# Supplementary material for: Pd-Catalyzed solvent-controlled site-selective arene C–H monoacyloxylation of pyrrolo[2,3-d]pyrimidine derivatives
Source: Royal Society of Chemistry journal article supplement (doi:10.1039/d1ob01486b), 2021-01-01

## Supporting Information

### **Pd-Catalyzed Solvent-controlled Direct Site-selective Arene C–H Monoacyloxylation of Pyrrolo[2,3-*d*]pyrimidine Derivatives**

Zhengtong Mao, Min Liu, Hongjie Qian, Yunfeng Jiang, Xingxian Zhang\*

*College of Pharmaceutical Science, Zhejiang University of Technology, Hangzhou  
310014, P. R. China*

#### **Table of Contents**

|                                                                  |      |
|------------------------------------------------------------------|------|
| 1. General information.....                                      | S2   |
| 2. Condition optimization.....                                   | S3   |
| 3. General procedure of the acetoxylation.....                   | S4   |
| 4. The supposed reaction mechanism.....                          | S8   |
| 5. Characterization of the products.....                         | S9   |
| 6. <sup>1</sup> H NMR, <sup>13</sup> C NMR and HRMS Spectra..... | S26  |
| 7. ESI-MS spectra for radical trapping experiment with BHT.....  | S116 |

## 1. General Information

All reagents were obtained from commercial suppliers and used without further purification. A series of substrates **1** were prepared according to the literature procedure.<sup>1</sup> 4-Chloro-7-methyl-7H-pyrrolo[2,3-*d*]pyrimidine is commercially available from Aladdin. Yields for all products were determined by the silica gel (200-300 mesh) column chromatography (eluent: petroleum ether 40-60/EtOAc), and the reactions were monitored by thin layer chromatography (TLC) on a glass plate coated with silica gel with fluorescent indicator (GF254) using UV light. The <sup>1</sup>H nuclear magnetic resonance (NMR) spectra were recorded on a Bruker ADNANCE 400 at 400 MHz, Bruker ADNANCE 500 at 500 MHz and Bruker ADNANCE 600 at 600 MHz using CDCl<sub>3</sub> as solvent with TMS as internal standard. <sup>13</sup>C NMR spectra were recorded on a Bruker AVANCE 400 at 101 MHz, Bruker AVANCE 500 at 126 MHz and Bruker AVANCE 600 at 151 MHz. Chemical shifts are given in ppm (δ) referenced to CDCl<sub>3</sub> with 7.26 for <sup>1</sup>H and 77.16 for <sup>13</sup>C, and to DMSO-*d*<sub>6</sub> with 2.50 for <sup>1</sup>H and 39.52 for <sup>13</sup>C. Signals are abbreviated as follows: s, singlet; d, doublet; t, triplet; q, quartet; m, multiplet, and coupling constants are expressed in hertz. Melting points were measured on a BUCHI B-540 and uncorrected. HRMS (ESI) was recorded using Agilent 6520 accurate-Mass Q-TOF LC/MS system (1200-6520/Agilent).

## 2. Condition Optimization

---

1. Mao, Z.; Liu, M.; Zhu, G.; Zhou, J.; Zhang, X., Transition-metal-free highly regioselective C–H acetoxylation of pyrrolo[2,3-*d*]pyrimidine derivatives. *Organic Chemistry Frontiers* 2020, 7, 2696-2702.

**Table S1.** Condition optimization<sup>a</sup>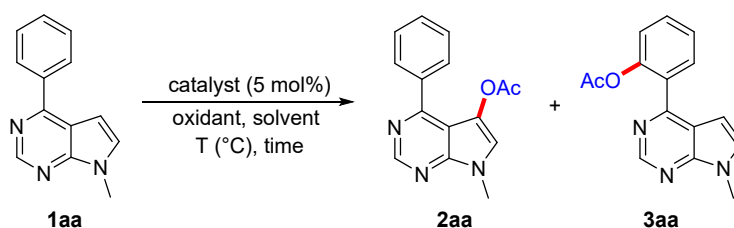

| Entry           | Catalyst                                           | Additive                                                | Solvent                      | T     | t(h) | 2aa(%) <sup>b</sup> | 3aa (%) <sup>b</sup> |
|-----------------|----------------------------------------------------|---------------------------------------------------------|------------------------------|-------|------|---------------------|----------------------|
| 1               | Pd(OAc) <sub>2</sub>                               | PIDA                                                    | Ac <sub>2</sub> O:HOAc = 1:1 | r.t.  | 20   | 30                  | 20                   |
| 2               | Pd(OAc) <sub>2</sub>                               | PIDA                                                    | HOAc                         | r.t.  | 20   | 85                  | -                    |
| 3               | /                                                  | PIDA                                                    | HOAc                         | r.t.  | 20   | 16                  | -                    |
| 4               | PdCl <sub>2</sub>                                  | PIDA                                                    | HOAc                         | r.t.  | 20   | 70                  | -                    |
| 5               | Pd(PPh <sub>3</sub> ) <sub>2</sub> Cl <sub>2</sub> | PIDA                                                    | HOAc                         | r.t.  | 20   | 50                  | -                    |
| 6               | Pd(MeCN) <sub>2</sub> Cl <sub>2</sub>              | PIDA                                                    | HOAc                         | r.t.  | 20   | 56                  | -                    |
| 7               | Pd(PPh <sub>3</sub> ) <sub>4</sub>                 | PIDA                                                    | HOAc                         | r.t.  | 20   | 53                  | -                    |
| 8               | Pd(OAc) <sub>2</sub>                               | PIDA                                                    | HOAc                         | 50 °C | 6    | 20                  | 56                   |
| 9               | Pd(OAc) <sub>2</sub>                               | PIDA                                                    | HOAc                         | 60 °C | 6    | 11                  | 50                   |
| 10              | Pd(OAc) <sub>2</sub>                               | PIDA                                                    | Ac <sub>2</sub> O            | 50 °C | 6    | -                   | 90                   |
| 11              | /                                                  | PIDA                                                    | Ac <sub>2</sub> O            | 50 °C | 6    | -                   | 30                   |
| 12              | Pd(PPh <sub>3</sub> ) <sub>2</sub> Cl <sub>2</sub> | PIDA                                                    | Ac <sub>2</sub> O            | 50 °C | 6    | -                   | 52                   |
| 13              | Pd(MeCN) <sub>2</sub> Cl <sub>2</sub>              | PIDA                                                    | Ac <sub>2</sub> O            | 50 °C | 6    | -                   | 56                   |
| 14              | Pd(PPh <sub>3</sub> ) <sub>4</sub>                 | PIDA                                                    | Ac <sub>2</sub> O            | 50 °C | 6    | -                   | 48                   |
| 15              | PdCl <sub>2</sub>                                  | PIDA                                                    | Ac <sub>2</sub> O            | 50 °C | 6    | 38                  | 23                   |
| 16              | Cu(OAc) <sub>2</sub>                               | PIDA                                                    | Ac <sub>2</sub> O            | 50 °C | 6    | -                   | 20                   |
| 17              | Co(OAc) <sub>2</sub>                               | PIDA                                                    | Ac <sub>2</sub> O            | 50 °C | 6    | -                   | 21                   |
| 18              | Pd(OAc) <sub>2</sub>                               | Cu(OAc) <sub>2</sub>                                    | Ac <sub>2</sub> O            | 50 °C | 6    | -                   | -                    |
| 19              | Pd(OAc) <sub>2</sub>                               | O <sub>2</sub> (1 atm)                                  | Ac <sub>2</sub> O            | 50 °C | 6    | -                   | -                    |
| 20              | Pd(OAc) <sub>2</sub>                               | AgOAc (200 mol%)                                        | Ac <sub>2</sub> O            | 50 °C | 6    | -                   | -                    |
| 21              | Pd(OAc) <sub>2</sub>                               | K <sub>2</sub> S <sub>2</sub> O <sub>8</sub> (300 mol%) | Ac <sub>2</sub> O            | 50 °C | 6    | -                   | -                    |
| 22              | Pd(OAc) <sub>2</sub>                               | PhI(OCOCF <sub>3</sub> ) <sub>2</sub> (PIFA)            | Ac <sub>2</sub> O            | 50 °C | 6    | -                   | -                    |
| 23 <sup>c</sup> | Pd(OAc) <sub>2</sub>                               | PIDA                                                    | HOAc                         | r.t.  | 20   | 80                  | -                    |
| 24 <sup>c</sup> | Pd(OAc) <sub>2</sub>                               | PIDA                                                    | Ac <sub>2</sub> O            | 50 °C | 6    | -                   | 86                   |

<sup>a</sup> Unless otherwise noted the reactions were performed on a 0.4 mmol scale of **1aa** using 1.2 equiv. of PIDA and 5 mol% of catalyst in solvent (4.0 mL) under air atmosphere. <sup>b</sup> Isolated yields. <sup>c</sup> 5 mmol gram scale.

## 2. General Procedures for the acetoxylation

### (1) General Procedures for the synthesis of **2**

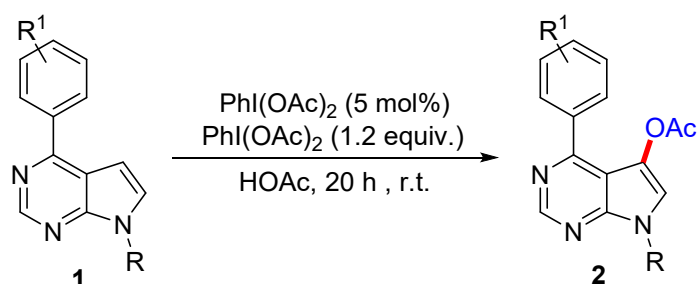

The reaction of 7-methyl-4-phenyl-7H-pyrrolo[2,3-d]pyrimidin-5-yl acetate **2aa** was exemplified here. Diacetoxyiodobenzene (155 mg, 0.48 mmol), HOAc (4 mL),  $\text{Pd}(\text{OAc})_2$  (4.5 mg, 0.02 mmol) and 7-methyl-4-phenyl-7H-pyrrolo[2,3-d]pyrimidine **1aa** (84 mg, 0.4 mmol) were added in a pressure vessel. The reaction mixture was stirred at room temperature for 20 h. After completion, the reaction was quenched with water (10 mL) and extracted with EA (3×20 mL). The organic layer was washed with saturated sodium bicarbonate (20 mL), brine (20 mL) and dried over anhydrous  $\text{Na}_2\text{SO}_4$ . After concentration in vacuo, the residue was purified by flash column chromatography (PE/EtOAc v/v 2:1) on silica gel to provide the desired product 7-methyl-4-phenyl-7H-pyrrolo[2,3-d]pyrimidin-5-yl acetate **2aa** (91 mg, 85% yield).

### (2) General Procedures for the synthesis of **3**:

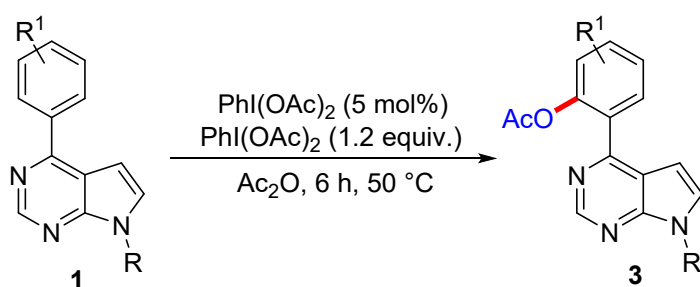

The reaction of 2-(7-methyl-7H-pyrrolo[2,3-d]pyrimidin-4-yl)phenyl acetate **3aa** was exemplified here. Diacetoxyiodobenzene (155 mg, 0.48 mmol),  $\text{Pd}(\text{OAc})_2$  (4.5 mg, 0.02 mmol),  $\text{Ac}_2\text{O}$  (4 mL) and 7-methyl-4-phenyl-7H-pyrrolo[2,3-d]pyrimidine **1aa** (84 mg, 0.4 mmol) were added in a pressure vessel. The reaction mixture was stirred at 50 °C for 6 h. After completion, it was then cooled to room temperature, the reaction was quenched with water (10 mL) and extracted with EA (3×20 mL). The organic layer

was washed with saturated sodium bicarbonate (20 mL), brine (20 mL) and dried over anhydrous  $\text{Na}_2\text{SO}_4$ . After concentration in vacuo, the residue was purified by flash column chromatography (PE/EtOAc v/v 2:1) on silica gel to provide the desired product 2-(7-methyl-7H-pyrrolo[2,3-*d*]pyrimidin-4-yl) phenyl acetate **3aa** (96 mg, 90% yield).

### (3) Preparation of compound 4

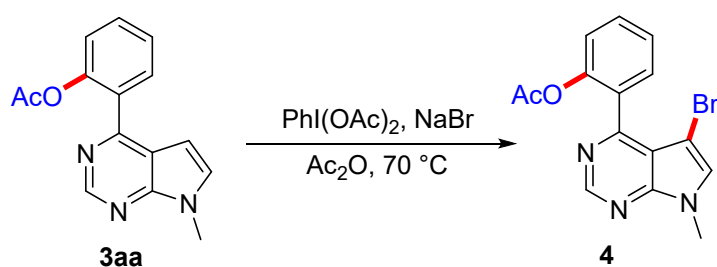

The reaction of 2-(5-bromo-7-methyl-7H-pyrrolo[2,3-*d*]pyrimidin-4-yl)phenyl acetate **4** was exemplified here.  $\text{PhI(OAc)}_2$  (934 mg, 2.9 mmol),  $\text{NaBr}$  (391 mg, 3.8 mmol), MeCN (20 mL) and **3aa** (507 mg, 1.9 mmol) were added in a 50 mL round-bottomed flask. The reaction mixture was stirred at 70 °C for 6 h. After completion, it was then cooled to room temperature, the reaction was quenched with water (10 mL) and extracted with EA (3×20 mL). The organic layer was washed with saturated sodium bicarbonate (20 mL), brine (20 mL) and dried over anhydrous  $\text{Na}_2\text{SO}_4$ . After concentration in vacuo, the residue was purified by flash silica gel chromatography using PE/EA (4:1) as eluents to afford the title compound **4** (427 mg, 65% yield).

### (4) Preparation of compound 5

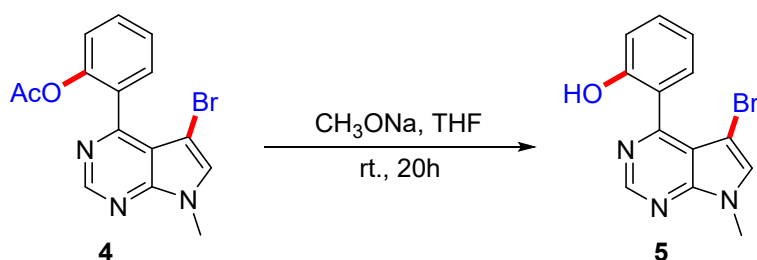

Compound **4** (170 mg, 0.5 mmol),  $\text{CH}_3\text{ONa}$  (33 mg, 0.6 mmol) and THF (5 mL) were added in a pressure vessel. The reaction mixture was stirred at room temperature for 20 h. After completion, the solvent was removed under reduced pressure and the residue was purified by silica gel chromatography using PE/EA (4:1) as eluents to afford the title compound **5** (110 mg, 73% yield).

### (5) Preparation of compound 6

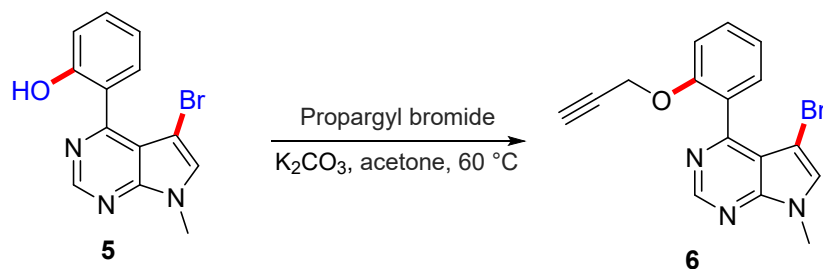

Compound **5** (80 mg, 0.26 mmol),  $K_2CO_3$  (43 mg, 0.3 mmol) and acetone (2 mL) were added in a pressure vessel. Propargyl bromide (47 mg, 0.4 mmol) was added and stirred at  $60\text{ }^\circ\text{C}$  for 6 h. After completion, the mixture was quenched by water (10 mL) and extracted with EtOAc (20 mL). The organic layer was washed with brine (10 mL). The organic phase was dried over anhydrous  $Na_2SO_4$  and concentrated in vacuo. The residue was purified by flash column chromatography (PE/EtOAc v/v 4:1) on silica gel to provide the desired product **6** (70 mg, 78% yield).

### (6) The competitive experiment 2

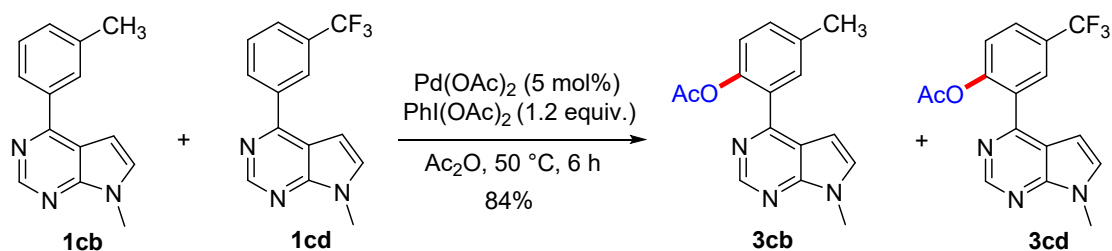

Compound **1cb** (89 mg, 0.4 mmol), compound **1cd** (111 mg, 0.4 mmol),  $PhI(OAc)_2$  (155 mg, 0.48 mmol),  $Pd(OAc)_2$  (4.5 mg, 0.02 mmol) and  $Ac_2O$  (4 mL) were added in a pressure vessel. The reaction mixture was stirred at  $50\text{ }^\circ\text{C}$  for 6 h. After completion, it was then cooled to room temperature, the reaction was quenched with water (10 mL) and extracted with EA ( $3 \times 20$  mL). The organic layer was washed with saturated sodium bicarbonate (20 mL), brine (20 mL) and dried over anhydrous  $Na_2SO_4$ . After concentration in vacuo, the residue was purified by flash column chromatography (PE/EtOAc v/v 4:1) on silica gel. Only product **3cb** (93 mg, 84% yield) was obtained.

### (7) Control experiment 3



#### 4. The supposed reaction mechanism

Based on the control experiments and the reported literatures<sup>1-3</sup>, we supposed a plausible pathway to explain this acetoxylation. The Pd(II)-complex **4/5** was formed by coordination **1aa** with Pd(OAc)<sub>2</sub>, followed by an oxidative addition of acetoxy radical in the presence of PIDA with HOAc or Ac<sub>2</sub>O to generate Pd (III) complex. Finally, the intramolecular acetoxy group transfer of Pd (III)-complex **6/7** produced the desired acetoxyated product **2aa/3aa**. However, the mechanism remains unclear. The investigations on the detailed mechanistic pathway are under way in our laboratory.

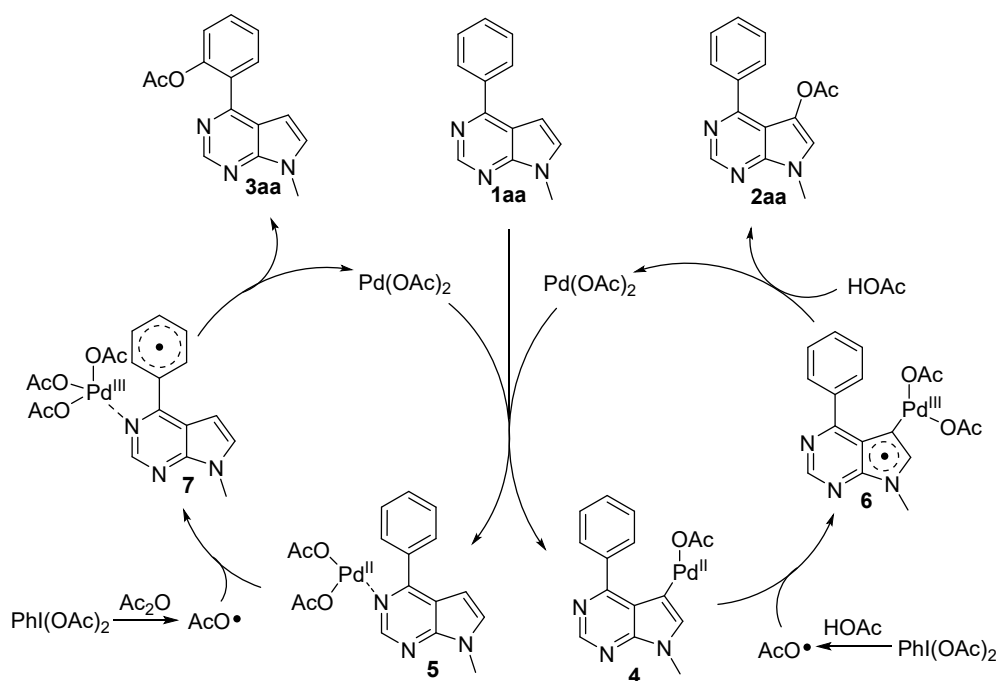

Reference :

1. Liu, Q.; Li, G.; Yi, H.; Wu, P.; Liu, J.; Lei, A. Pd-Catalyzed Direct and Selective C-H Functionalization: C3-Acetoxylation of Indoles. *Chem. Eur. J.* **2011**, *17*, 2353-2357.
2. K. K. Yu, Y. Guo, Y. H. Hu, Z. Xu, H. W. Liu, D. H. Liao, Y. F. Ji, Palladium-Catalyzed Diverse mono-Acyloxylation of 5-Alkyl-4-aryl-thiazole-2-carboxylates, *Asian. J. Org. Chem.*, 2016, **5**, 1219-1224.
3. S. K. Santra, A. Banerjee, N. Khatun, B. K. Patel, Ceric Ammonium Nitrate (CAN) Promoted PdII-Catalyzed Substrate-Directed o-Benzoylation and Decarboxylative o-Aroylation, *Eur. J. Org. Chem.* 2015, **2015**, 350-356.



#### 4. Characterization of the products

##### 7-methyl-4-phenyl-7H-pyrrolo[2,3-d]pyrimidin-5-yl acetate (2aa)

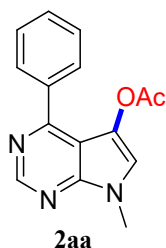

Yellow solid (90 mg, 84% yield) Mp: 128-131 °C. <sup>1</sup>H NMR (500 MHz, CDCl<sub>3</sub>) δ 8.98 (s, 1H), 7.89-7.82 (m, 2H), 7.52 (dd, *J* = 5.2, 2.0 Hz, 3H), 7.26 (s, 1H), 3.92 (s, 3H), 2.03 (s, 3H). <sup>13</sup>C NMR (126 MHz, CDCl<sub>3</sub>) δ 168.70, 158.54, 151.74, 148.28, 139.88, 134.88, 129.41, 128.82, 126.93, 119.15, 108.47, 31.07, 20.65. HRMS-ESI calculated for C<sub>15</sub>H<sub>14</sub>N<sub>3</sub>O<sub>2</sub> [M+H]<sup>+</sup> 268.1086, found 268.1082.

##### 4-phenyl-7-propyl-7H-pyrrolo[2,3-d]pyrimidin-5-yl acetate (2ab)

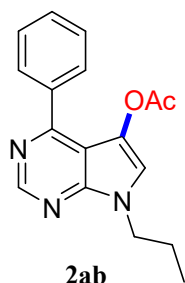

Yellow viscous oil (99 mg, 84% yield). <sup>1</sup>H NMR (500 MHz, CDCl<sub>3</sub>) δ 8.95 (s, 1H), 7.87-7.82 (m, 2H), 7.50 (p, *J* = 3.0, 2.4 Hz, 3H), 7.30 (s, 1H), 4.27 (t, *J* = 7.2 Hz, 2H), 2.02 (s, 3H), 1.92 (dt, *J* = 14.7, 7.4 Hz, 2H), 0.98 (t, *J* = 7.4 Hz, 3H). <sup>13</sup>C NMR (126 MHz, CDCl<sub>3</sub>) δ 168.56, 158.45, 151.59, 147.98, 137.71, 129.62, 129.41, 128.05, 126.89, 118.26, 108.59, 46.18, 23.47, 20.54, 11.27. HRMS-ESI calculated for C<sub>17</sub>H<sub>18</sub>N<sub>3</sub>O<sub>2</sub> [M+H]<sup>+</sup> 296.1394, found 296.1394.

##### 7-benzyl-4-phenyl-7H-pyrrolo[2,3-d]pyrimidin-5-yl acetate (2ac)

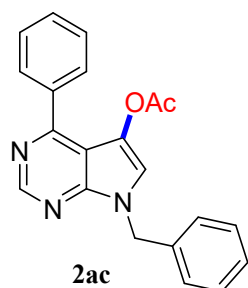

White solid (104 mg, 76% yield). Mp: 97-100 °C. <sup>1</sup>H NMR (500 MHz, CDCl<sub>3</sub>) δ 9.00 (s, 1H), 7.88-7.85 (m, 2H), 7.54-7.50 (m, 3H), 7.38-7.32 (m, 2H), 7.32-7.27 (m, 3H), 7.25 (s, 1H), 5.50 (s, 2H), 2.00 (s, 3H). <sup>13</sup>C NMR (101 MHz, CDCl<sub>3</sub>) δ 168.46, 158.64, 151.94, 148.30, 137.64, 136.35, 129.69, 129.42, 128.91, 128.11, 128.08, 127.79, 127.40, 118.09, 108.68, 47.87, 20.51. HRMS-ESI calculated for C<sub>21</sub>H<sub>18</sub>N<sub>3</sub>O<sub>2</sub> [M+H]<sup>+</sup> 344.1394, found 344.1394.

##### 4-phenyl-7-((2-(trimethylsilyl)ethoxy)methyl)-7H-pyrrolo[2,3-d]pyrimidin-5-yl acetate (2ad)

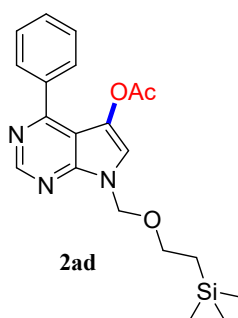

White solid (132 mg, 87% yield). Mp: 63-66 °C. <sup>1</sup>H NMR (500 MHz, CDCl<sub>3</sub>) δ 8.98 (s, 1H), 7.88-7.82 (m, 2H), 7.52 (dd, *J* = 5.1, 2.0 Hz, 3H), 7.43 (s, 1H), 5.70 (s, 2H), 3.64-3.58 (m, 2H), 2.02 (s, 3H), 1.00-0.90 (m, 2H), -0.02 (s, 9H). <sup>13</sup>C NMR (151 MHz, CDCl<sub>3</sub>) δ 168.35, 158.77, 152.13, 149.06, 137.51, 129.77, 129.44, 128.11, 128.03, 117.93, 108.90, 72.80, 66.73, 20.53, 17.75, -1.45. HRMS-ESI calculated for C<sub>20</sub>H<sub>26</sub>N<sub>3</sub>O<sub>3</sub>Si [M+H]<sup>+</sup> 384.1738, found 384.1737.

#### 4-phenyl-7*H*-pyrrolo[2,3-*d*]pyrimidin-5-yl acetate (2ae)

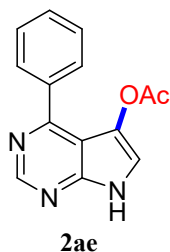

White solid (88 mg, 87% yield). Mp: 99-101 °C. <sup>1</sup>H NMR (500 MHz, CDCl<sub>3</sub>) δ 11.44 (s, 1H), 9.02 (s, 1H), 7.91-7.86 (m, 1H), 7.71 (dd, *J* = 11.5, 7.6 Hz, 1H), 7.54 (d, *J* = 3.4 Hz, 2H), 7.50 (d, *J* = 7.7 Hz, 1H), 7.41 (s, 1H), 2.04 (s, 3H). <sup>13</sup>C NMR (126 MHz, CDCl<sub>3</sub>) δ 167.41, 152.74, 152.36, 151.42, 132.35, 130.88, 130.00, 128.85, 127.88, 118.91, 104.92, 26.01. C<sub>14</sub>H<sub>11</sub>N<sub>3</sub>O<sub>2</sub>Na [M+Na]<sup>+</sup> 276.0743, found 276.0643.

#### 7-methyl-4-(*p*-tolyl)-7*H*-pyrrolo[2,3-*d*]pyrimidin-5-yl acetate (2ba)

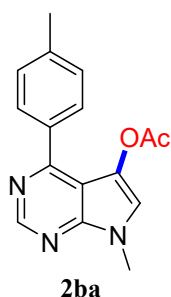

Yellow solid (99 mg, 88% yield). Mp: 155-157 °C. <sup>1</sup>H NMR (500 MHz, CDCl<sub>3</sub>) δ 8.95 (s, 1H), 7.80-7.73 (m, 2H), 7.32 (d, *J* = 7.9 Hz, 2H), 7.25 (s, 1H), 3.90 (s, 3H), 2.45 (s, 3H), 2.06 (s, 3H). <sup>13</sup>C NMR (126 MHz, CDCl<sub>3</sub>) δ 168.70, 158.54, 151.74, 148.28, 139.88, 134.88, 129.41, 128.82, 126.93, 119.15, 108.47, 31.07, 21.44, 20.65. HRMS-ESI calculated for C<sub>16</sub>H<sub>16</sub>N<sub>3</sub>O<sub>2</sub> [M+H]<sup>+</sup> 282.1242, found 282.1243.

#### 4-(4-(*tert*-butyl)phenyl)-7-methyl-7*H*-pyrrolo[2,3-*d*]pyrimidin-5-yl acetate (2bb)

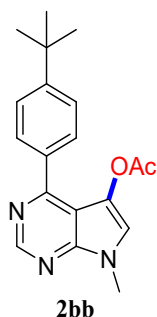

Yellow solid (107 mg, 83% yield). Mp: 110-112 °C. <sup>1</sup>H NMR (600 MHz, CDCl<sub>3</sub>) δ 8.85 (s, 1H), 7.69 (d, *J* = 8.2 Hz, 2H), 7.44 (d, *J* = 8.2 Hz, 2H), 7.14 (s, 1H), 3.80 (s, 3H), 1.92 (s, 3H), 1.29 (s, 9H). <sup>13</sup>C NMR (151 MHz, CDCl<sub>3</sub>) δ 168.75, 158.53, 153.07, 151.64, 148.25, 134.58, 129.18, 127.00, 125.12, 119.31, 108.62, 34.81, 31.29, 31.12, 20.52. HRMS-ESI calculated for C<sub>19</sub>H<sub>22</sub>N<sub>3</sub>O<sub>2</sub> [M+H]<sup>+</sup> 324.1707, found 324.1717.

#### 4-(4-methoxyphenyl)-7-methyl-7*H*-pyrrolo[2,3-*d*]pyrimidin-5-yl acetate (2bc)

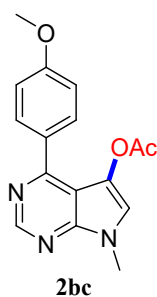

Yellow solid (108 mg, 91% yield). Mp: 138-141 °C. <sup>1</sup>H NMR (500 MHz, CDCl<sub>3</sub>) δ 8.93 (s, 1H), 7.90-7.83 (m, 2H), 7.25 (s, 1H), 7.08-6.99 (m, 2H), 3.90 (s, 6H), 2.10 (s, 3H). <sup>13</sup>C NMR (126 MHz, CDCl<sub>3</sub>) δ 168.70, 161.12, 158.14, 151.74, 148.29, 131.07, 130.25, 126.96, 119.03, 113.60, 108.24, 55.42, 31.11, 20.74. HRMS-ESI calculated for C<sub>16</sub>H<sub>16</sub>N<sub>3</sub>O<sub>3</sub> [M+H]<sup>+</sup> 298.1191, found 298.1192.

#### 4-(4-cyanophenyl)-7-methyl-7H-pyrrolo[2,3-d]pyrimidin-5-yl acetate (2bd)

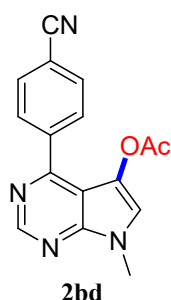

Yellow solid (77 mg, 66% yield). Mp:182-185 °C. <sup>1</sup>H NMR (500 MHz, CDCl<sub>3</sub>) δ 8.99 (s, 1H), 8.00 – 7.98 (m, 2H), 7.83 – 7.81 (m, 2H), 7.38 (s, 1H), 3.93 (s, 3H), 2.07 (s, 3H). <sup>13</sup>C NMR (126 MHz, CDCl<sub>3</sub>) δ 168.26, 163.57, 155.95, 151.78, 142.10, 132.33, 131.81, 130.40, 130.25, 126.56, 120.14, 113.34, 31.23, 20.64. HRMS-ESI calculated for C<sub>16</sub>H<sub>13</sub>N<sub>4</sub>O<sub>2</sub> [M+H]<sup>+</sup> 293.1038, found 293.1035.

#### 7-methyl-4-(4-(trifluoromethyl)phenyl)-7H-pyrrolo[2,3-d]pyrimidin-5-yl acetate (2be)

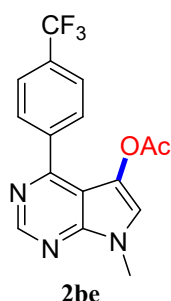

Yellow solid (103 mg, 77% yield). Mp:123-126 °C. <sup>1</sup>H NMR (400 MHz, CDCl<sub>3</sub>) δ 8.95 (s, 1H), 7.95 (d, *J* = 8.0 Hz, 2H), 7.75 (d, *J* = 8.1 Hz, 2H), 7.30 (s, 1H), 3.88 (s, 3H), 2.00 (s, 3H). <sup>13</sup>C NMR (101 MHz, CDCl<sub>3</sub>) δ 168.38, 156.57, 151.69, 148.26, 141.13, 131.49 (*J*<sub>C-F</sub> = 64.64 Hz), 129.88, 126.60, 124.94 (*J*<sub>C-F</sub> = 4.04 Hz), 124.04 (*J*<sub>C-F</sub> = 272.7 Hz), 119.88, 108.63, 31.08, 20.45. HRMS-ESI calculated for C<sub>16</sub>H<sub>13</sub>F<sub>3</sub>N<sub>3</sub>O<sub>2</sub> [M+H]<sup>+</sup> 366.0960, found 366.0950.

#### 4-(4-fluorophenyl)-7-methyl-7H-pyrrolo[2,3-d]pyrimidin-5-yl acetate (2bf)

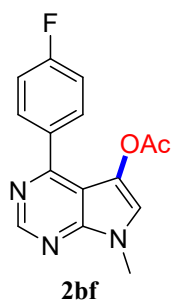

Yellow solid (93 mg, 81% yield). Mp:126-129 °C. <sup>1</sup>H NMR (500 MHz, CDCl<sub>3</sub>) δ 8.90 (s, 1H), 7.86 – 7.81 (m, 2H), 7.24 (s, 1H), 7.16 (t, *J* = 8.7 Hz, 2H), 3.84 (s, 3H), 2.03 (s, 3H). <sup>13</sup>C NMR (126 MHz, CDCl<sub>3</sub>) δ 168.53, 164.91, 162.93, 157.28, 151.75, 148.29, 131.52 (*J*<sub>C-F</sub> = 8.82 Hz), 126.80, 119.43, 115.19 (*J*<sub>C-F</sub> = 21.4 Hz), 108.44, 31.14, 20.64. HRMS-ESI calculated for C<sub>15</sub>H<sub>13</sub>FN<sub>3</sub>O<sub>2</sub> [M+H]<sup>+</sup> 286.0992, found 286.0983.

#### 4-(4-chlorophenyl)-7-methyl-7H-pyrrolo[2,3-d]pyrimidin-5-yl acetate (2bg)

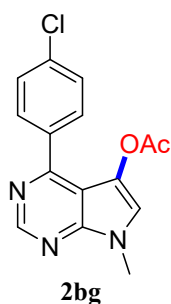

Yellow solid (110 mg, 90% yield). Mp:162-165 °C. <sup>1</sup>H NMR (500 MHz, CDCl<sub>3</sub>) δ 8.90 (s, 1H), 7.79 – 7.74 (m, 2H), 7.46 – 7.42 (m, 2H), 7.26 (s, 1H), 3.83 (s, 3H), 2.03 (s, 3H). <sup>13</sup>C NMR (126 MHz, CDCl<sub>3</sub>) δ 168.52, 157.07, 151.75, 148.31, 136.18, 136.06, 130.87, 128.35, 126.74, 119.56, 108.46, 31.15, 20.68. HRMS-ESI calculated for C<sub>15</sub>H<sub>13</sub>ClN<sub>3</sub>O<sub>2</sub> [M+H]<sup>+</sup> 302.0691, found 302.0680.

#### 4-(3-methoxyphenyl)-7-methyl-7H-pyrrolo[2,3-d]pyrimidin-5-yl acetate (2ca)

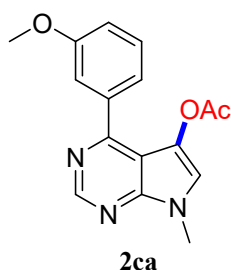

White solid (98 mg, 82% yield). Mp: 156-159 °C. <sup>1</sup>H NMR (400 MHz, CDCl<sub>3</sub>) δ 8.96 (s, 1H), 7.45-7.39 (m, 3H), 7.24 (s, 1H), 7.07-7.03 (m, 1H), 3.90 (s, 6H), 2.05 (s, 3H). <sup>13</sup>C NMR (101 MHz, CDCl<sub>3</sub>) δ 168.87, 159.43, 158.29, 151.69, 148.36, 138.92, 129.15, 126.83, 121.91, 119.52, 115.72, 114.57, 108.66, 55.39, 31.13, 20.49. HRMS-ESI calculated for C<sub>16</sub>H<sub>16</sub>N<sub>3</sub>O<sub>3</sub> [M+H]<sup>+</sup> 298.1186, found 298.1181.

#### 7-methyl-4-(m-tolyl)-7H-pyrrolo[2,3-d]pyrimidin-5-yl acetate (2cb)

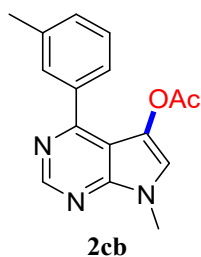

Yellow solid (90 mg, 80% yield). Mp: 99-102 °C. <sup>1</sup>H NMR (600 MHz, CDCl<sub>3</sub>) δ 8.88 (s, 1H), 7.59 (d, *J* = 2.1 Hz, 1H), 7.55 (d, *J* = 7.7 Hz, 1H), 7.31 (t, *J* = 7.6 Hz, 1H), 7.23 (d, *J* = 7.5 Hz, 1H), 7.16 (s, 1H), 3.83-3.81 (m, 3H), 2.38 (s, 3H), 1.95 (s, 3H). <sup>13</sup>C NMR (151 MHz, CDCl<sub>3</sub>) δ 168.73, 158.69, 151.76, 148.30, 137.80, 137.59, 130.52, 130.01, 127.97, 126.92, 126.64, 119.28, 108.61, 31.11, 21.46, 20.50. HRMS-ESI calculated for C<sub>16</sub>H<sub>16</sub>N<sub>3</sub>O<sub>2</sub> [M+H]<sup>+</sup> 282.1237, found 282.1241.

#### 7-methyl-4-(3-(trifluoromethyl)phenyl)-7H-pyrrolo[2,3-d]pyrimidin-5-yl acetate (2cc)

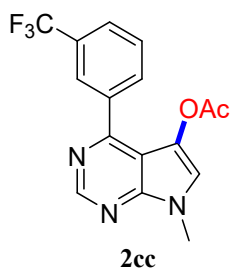

Yellow solid (99 mg, 74% yield). Mp: 123-125 °C. <sup>1</sup>H NMR (500 MHz, CDCl<sub>3</sub>) δ 8.98 (s, 1H), 8.18-8.10 (m, 2H), 7.78 (d, *J* = 7.8 Hz, 1H), 7.67 (t, *J* = 7.8 Hz, 1H), 7.39 (s, 1H), 3.92 (s, 3H), 2.06 (s, 3H). <sup>13</sup>C NMR (126 MHz, CDCl<sub>3</sub>) δ 168.43, 156.55, 151.74, 148.23, 138.48, 132.84, 130.45 (*J*<sub>C-F</sub> = 32.76 Hz), 128.84, 126.72, 126.56 (*J*<sub>C-F</sub> = 7.53 Hz), 126.40 (*J*<sub>C-F</sub> = 7.56 Hz), 124.08 (*J*<sub>C-F</sub> = 136.71 Hz), 119.77, 108.42, 31.17, 20.39. HRMS-ESI calculated for C<sub>16</sub>H<sub>13</sub>F<sub>3</sub>N<sub>3</sub>O<sub>2</sub> [M+H]<sup>+</sup> 336.0960, found 336.0947.

#### 4-(3-cyanophenyl)-7-methyl-7H-pyrrolo[2,3-d]pyrimidin-5-yl acetate (2cd)

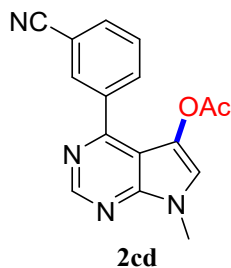

Yellow solid (98 mg, 84% yield). Mp: 120-122 °C. <sup>1</sup>H NMR (500 MHz, CDCl<sub>3</sub>) δ 8.99 (s, 1H), 8.21 (t, *J* = 1.4 Hz, 1H), 8.17 (dt, *J* = 7.9, 1.3 Hz, 1H), 7.80 (dt, *J* = 7.7, 1.4 Hz, 1H), 7.66 (t, *J* = 7.8 Hz, 1H), 7.42 (s, 1H), 3.93 (s, 3H), 2.14 (s, 3H). <sup>13</sup>C NMR (126 MHz, CDCl<sub>3</sub>) δ 168.17, 155.49, 151.68, 148.21, 138.77, 133.84, 133.34, 133.01, 129.15, 126.55, 120.08, 118.41, 112.32, 108.38, 31.24, 20.63. HRMS-ESI calculated for C<sub>16</sub>H<sub>13</sub>N<sub>4</sub>O<sub>2</sub> [M+H]<sup>+</sup> 293.1038, found 293.1036.

#### 4-(3-chlorophenyl)-7-methyl-7H-pyrrolo[2,3-d]pyrimidin-5-yl acetate (2ce)

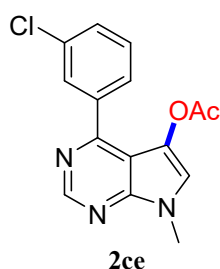

White solid (95 mg, 79% yield). Mp: 117-119 °C.  $^1\text{H}$  NMR (500 MHz,  $\text{CDCl}_3$ )  $\delta$  8.95 (s, 1H), 7.87 (d,  $J = 1.9$  Hz, 1H), 7.80 (dt,  $J = 7.0, 1.7$  Hz, 1H), 7.50-7.43 (m, 2H), 7.32 (s, 1H), 3.90 (s, 3H), 2.12 (s, 3H).  $^{13}\text{C}$  NMR (126 MHz,  $\text{CDCl}_3$ )  $\delta$  168.49, 156.64, 151.67, 148.26, 139.37, 133.87, 129.71, 129.53, 127.62, 126.66, 119.65, 108.41, 31.11, 20.52 (one  $\text{sp}^2$  signal were not observed because of overlapping). HRMS-ESI calculated for  $\text{C}_{15}\text{H}_{13}\text{ClN}_3\text{O}_2$   $[\text{M}+\text{H}]^+$  302.0691, found 302.0689.

#### 7-methyl-4-(o-tolyl)-7H-pyrrolo[2,3-d]pyrimidin-5-yl acetate (2da)

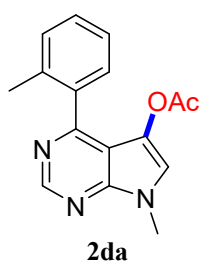

Yellow viscous oil (90 mg, 80% yield).  $^1\text{H}$  NMR (500 MHz,  $\text{CDCl}_3$ )  $\delta$  8.97 (s, 1H), 7.32-7.30 (m, 1H), 7.30-7.28 (m, 3H), 7.14 (s, 1H), 3.91 (s, 3H), 2.24 (s, 3H), 1.72 (s, 3H).  $^{13}\text{C}$  NMR (126 MHz,  $\text{CDCl}_3$ )  $\delta$  169.02, 159.31, 151.77, 148.00, 136.82, 136.47, 130.27, 129.36, 128.89, 127.15, 125.26, 119.24, 110.15, 31.03, 19.79, 19.57. HRMS-ESI calculated for  $\text{C}_{16}\text{H}_{16}\text{N}_3\text{O}_2$   $[\text{M}+\text{H}]^+$  282.1242, found 282.1032.

#### 4-(2-methoxyphenyl)-7-methyl-7H-pyrrolo[2,3-d]pyrimidin-5-yl acetate (2db)

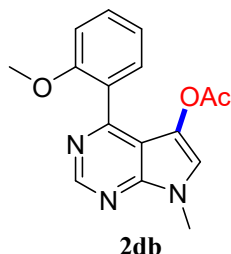

Yellow viscous oil (97 mg, 82% yield).  $^1\text{H}$  NMR (500 MHz,  $\text{CDCl}_3$ )  $\delta$  8.98 (s, 1H), 7.49-7.41 (m, 2H), 7.16 (s, 1H), 7.09 (td,  $J = 7.5, 1.0$  Hz, 1H), 7.02 (dd,  $J = 8.2, 1.0$  Hz, 1H), 3.89 (s, 3H), 3.76 (s, 3H), 1.84 (s, 3H).  $^{13}\text{C}$  NMR (126 MHz,  $\text{CDCl}_3$ )  $\delta$  168.76, 157.14, 156.28, 151.91, 147.61, 130.79, 130.63, 127.35, 127.00, 120.56, 119.13, 110.79, 110.65, 55.60, 31.00, 20.09. HRMS-ESI calculated for  $\text{C}_{16}\text{H}_{16}\text{N}_3\text{O}_3$   $[\text{M}+\text{H}]^+$  298.1191, found 298.1189.

#### 4-(2-chlorophenyl)-7-methyl-7H-pyrrolo[2,3-d]pyrimidin-5-yl acetate (2dc)

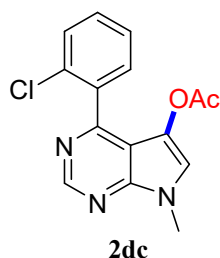

Yellow viscous oil (85 mg, 70% yield).  $^1\text{H}$  NMR (500 MHz,  $\text{CDCl}_3$ )  $\delta$  8.94 (s, 1H), 7.47 (dd,  $J = 7.4, 1.7$  Hz, 1H), 7.43 – 7.40 (m, 1H), 7.37–7.40 (m, 2H), 7.22 (s, 1H), 3.84 (s, 3H), 1.79 (s, 3H).  $^{13}\text{C}$  NMR (126 MHz,  $\text{CDCl}_3$ )  $\delta$  168.52, 156.03, 151.79, 147.58, 136.56, 133.08, 130.99, 130.20, 129.43, 126.97, 126.58, 119.56, 110.13, 31.06, 20.06. HRMS-ESI calculated for  $\text{C}_{15}\text{H}_{13}\text{ClN}_3\text{O}_2$   $[\text{M}+\text{H}]^+$  302.0696, found 302.0685.

#### 2-(5-acetoxy-7-methyl-7H-pyrrolo[2,3-d]pyrimidin-4-yl)phenyl acetate (2dd)

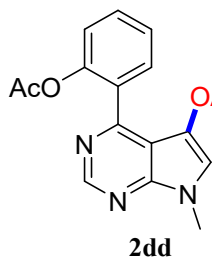

Yellow viscous oil (114 mg, 87% yield).  $^1\text{H}$  NMR (500 MHz,  $\text{CDCl}_3$ )  $\delta$  8.96 (s, 1H), 7.59-7.57 (m, 1H), 7.54-7.49 (m, 1H), 7.39-7.37 (m, 1H), 7.34-7.32 (m, 1H), 7.26 (s, 1H), 3.91 (s, 3H), 1.99 (s, 3H), 1.93 (s, 3H).  $^{13}\text{C}$  NMR (126 MHz,  $\text{CDCl}_3$ )  $\delta$  168.77, 168.70, 155.06, 151.70, 148.40, 147.78, 131.17, 130.30, 130.28, 126.84, 125.46, 122.69, 119.58, 109.74, 31.06, 20.75, 20.29. HRMS-ESI calculated for  $\text{C}_{17}\text{H}_{16}\text{N}_3\text{O}_4$   $[\text{M}+\text{H}]^+$  326.1141, found 326.1135.

#### 2-(5-acetoxy-7-methyl-7H-pyrrolo[2,3-d]pyrimidin-4-yl)-1,3-phenylene diacetate (2de)

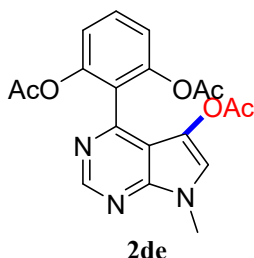

Yellow oil (123 mg, 80% yield).  $^1\text{H}$  NMR (500 MHz,  $\text{CDCl}_3$ )  $\delta$  8.97 (s, 1H), 7.52 (t,  $J = 8.3$  Hz, 1H), 7.30 (s, 1H), 7.27 (d,  $J = 3.3$  Hz, 2H), 3.91 (s, 3H), 1.92 (s, 3H), 1.91 (s, 6H).  $^{13}\text{C}$  NMR (126 MHz,  $\text{CDCl}_3$ )  $\delta$  168.63, 168.26, 151.70, 151.07, 149.15, 147.35, 129.79, 126.70, 123.63, 119.92, 119.69, 110.56, 31.08, 20.67, 20.23. HRMS-ESI calculated for  $\text{C}_{19}\text{H}_{18}\text{N}_3\text{O}_6$   $[\text{M}+\text{H}]^+$  384.1190, found 384.1189.

#### 4-(3,4-difluorophenyl)-7-methyl-7H-pyrrolo[2,3-d]pyrimidin-5-yl acetate (2e)

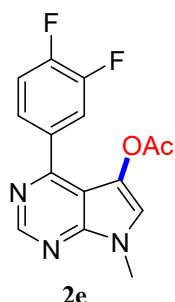

Yellow solid (97 mg, 80% yield). Mp: 145-148 °C.  $^1\text{H}$  NMR (500 MHz,  $\text{CDCl}_3$ )  $\delta$  8.95 (s, 1H), 7.80-7.76 (m, 1H), 7.72-7.65 (m, 1H), 7.35 (s, 1H), 7.33-7.29 (m, 1H), 3.92 (s, 3H), 2.15 (s, 3H).  $^{13}\text{C}$  NMR (126 MHz,  $\text{CDCl}_3$ )  $\delta$  168.41, 155.86, 151.78 ( $J_{\text{C-F}} = 146.16$  Hz), 151.67, 149.79 ( $J_{\text{C-F}} = 180.18$  Hz), 148.35, 134.69, 126.59, 125.98 ( $J_{\text{C-F}} = 6.3$  Hz), 119.78, 118.84 ( $J_{\text{C-F}} = 18.90$  Hz), 117.10 ( $J_{\text{C-F}} = 8.82$  Hz), 108.28, 31.18, 20.60; HRMS-ESI calculated for  $\text{C}_{15}\text{H}_{12}\text{F}_2\text{N}_3\text{O}_2$   $[\text{M}+\text{H}]^+$  304.0897, found 304.0889.

#### 4-(3,5-difluorophenyl)-7-methyl-7H-pyrrolo[2,3-d]pyrimidin-5-yl acetate (2f)

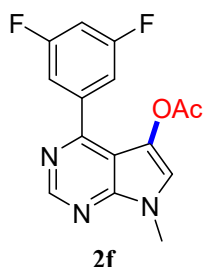

Yellow solid (91 mg, 75% yield). Mp: 146-148 °C.  $^1\text{H}$  NMR (500 MHz,  $\text{CDCl}_3$ )  $\delta$  8.97 (s, 1H), 7.52-7.44 (m, 2H), 7.36 (s, 1H), 7.01-6.93 (m, 1H), 3.93 (s, 3H), 2.16 (s, 3H).  $^{13}\text{C}$  NMR (126 MHz,  $\text{CDCl}_3$ )  $\delta$  168.49, 162.73 ( $J_{\text{C-F}} = 236.88$  Hz), 155.57, 151.66, 148.47, 140.88, 126.51, 120.09, 112.63 ( $J_{\text{C-F}} = 26.8$  Hz), 108.37, 105.01 ( $J_{\text{C-F}} = 25.2$  Hz), 31.22, 20.47. HRMS-ESI calculated for  $\text{C}_{15}\text{H}_{12}\text{F}_2\text{N}_3\text{O}_2$   $[\text{M}+\text{H}]^+$  304.0897, found 304.0893.

**4-(4'-(tert-butyl)-[1,1'-biphenyl]-2-yl)-7-methyl-7H-pyrrolo[2,3-d]pyrimidin-5-yl acetate (2g)**

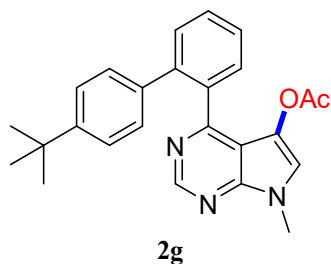

White amorphous solid (140 mg, 88% yield). Mp: 133-136 °C. <sup>1</sup>H NMR (500 MHz, CDCl<sub>3</sub>) δ 8.79 (s, 1H), 7.54-7.50 (m, 2H), 7.49-7.43 (m, 2H), 7.15 (d, *J* = 8.4 Hz, 2H), 7.07 (d, *J* = 6.6 Hz, 2H), 7.03 (s, 1H), 3.83 (s, 3H), 1.81 (s, 3H), 1.23 (s, 9H). <sup>13</sup>C NMR (126 MHz, CDCl<sub>3</sub>) δ 168.89, 159.59, 151.55, 149.40, 147.65, 141.30, 137.37, 135.96, 130.21, 130.17, 129.09, 128.77, 126.97, 126.44, 124.73, 118.91, 110.42, 34.32, 31.22, 30.90, 19.99. HRMS-ESI calculated for C<sub>25</sub>H<sub>25</sub>N<sub>3</sub>O<sub>2</sub> [M+H]<sup>+</sup> 400.2020, found 400.2022.

**7-methyl-4-(naphthalen-1-yl)-7H-pyrrolo[2,3-d]pyrimidin-5-yl acetate (2h)**

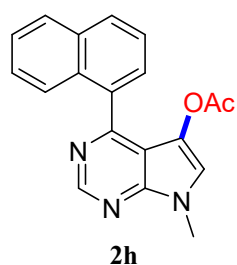

Yellow viscous solid (109 mg, 86% yield). Mp: 148-150 °C. <sup>1</sup>H NMR (500 MHz, CDCl<sub>3</sub>) δ 9.07 (s, 1H), 7.98 (d, *J* = 7.4 Hz, 1H), 7.92 (d, *J* = 8.4 Hz, 1H), 7.80 (d, *J* = 8.5 Hz, 1H), 7.64-7.59 (m, 2H), 7.54-7.49 (m, 1H), 7.44-7.42 (m, 1H), 7.21 (s, 1H), 3.93 (s, 3H), 1.36 (s, 3H). <sup>13</sup>C NMR (126 MHz, CDCl<sub>3</sub>) δ 168.41, 157.97, 151.92, 147.76, 134.99, 133.40, 131.30, 129.48, 128.06, 127.81, 126.91, 126.52, 126.02, 125.60, 124.92, 119.48, 110.70, 31.04, 19.52. HRMS-ESI calculated for C<sub>19</sub>H<sub>16</sub>N<sub>3</sub>O<sub>2</sub> [M+H]<sup>+</sup> 318.1242, found 318.1241.

**7-methyl-4-(thiophen-2-yl)-7H-pyrrolo[2,3-d]pyrimidin-5-yl acetate (2i)**

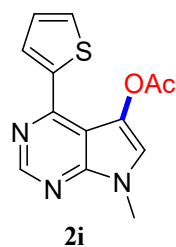

Yellow solid (85 mg, 78% yield). Mp: 144-146 °C. <sup>1</sup>H NMR (500 MHz, CDCl<sub>3</sub>) δ 8.81 (s, 1H), 8.02 (dd, *J* = 3.8, 1.1 Hz, 1H), 7.55 (dd, *J* = 5.1, 1.1 Hz, 1H), 7.34 (s, 1H), 7.17 (dd, *J* = 5.0, 3.8 Hz, 1H), 3.83 (s, 3H), 2.29 (s, 3H). <sup>13</sup>C NMR (126 MHz, CDCl<sub>3</sub>) δ 168.27, 151.25, 148.34, 135.82, 130.13, 129.85, 129.17, 127.79, 126.72, 119.99, 119.45, 31.15, 21.05. HRMS-ESI calculated for C<sub>13</sub>H<sub>12</sub>N<sub>3</sub>O<sub>2</sub>S [M+H]<sup>+</sup> 274.0645, found 274.0645.

**7-methyl-4-phenyl-7H-pyrrolo[2,3-d]pyrimidin-5-yl propionate (2j)**

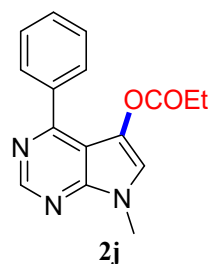

White solid (68mg, 60% yield). Mp: 93-96 °C. <sup>1</sup>H NMR (500 MHz, CDCl<sub>3</sub>) δ 8.94 (s, 1H), 7.82 (dd, *J* = 6.3, 3.0 Hz, 2H), 7.47 (dd, *J* = 4.7, 1.9 Hz, 3H), 7.24 (s, 1H), 3.86 (s, 3H), 2.30 (q, *J* = 7.5 Hz, 2H), 0.99 (t, *J* = 7.5 Hz, 3H). <sup>13</sup>C NMR (126 MHz, CDCl<sub>3</sub>) δ 172.07, 158.36, 151.58, 148.14, 137.66, 129.54, 129.35, 127.97, 126.88, 119.20, 108.59, 30.97, 27.14, 8.51. HRMS-ESI calculated for C<sub>16</sub>H<sub>16</sub>N<sub>3</sub>O<sub>2</sub> [M+H]<sup>+</sup> 282.1237, found 282.1238.

### 7-methyl-4-(naphthalen-1-yl)-7H-pyrrolo[2,3-d]pyrimidin-5-yl propionate (2k)

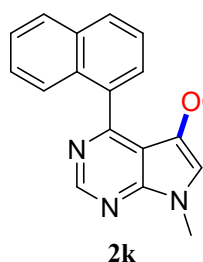

White amorphous solid (80 mg, 60% yield). Mp: 130-133 °C. <sup>1</sup>H NMR (500 MHz, CDCl<sub>3</sub>) δ 9.06 (s, 1H), 7.95 (dd, *J* = 26.7, 7.9 Hz, 2H), 7.77 (d, *J* = 8.5 Hz, 1H), 7.64-7.56 (m, 2H), 7.55-7.47 (m, 1H), 7.42 (t, *J* = 7.6 Hz, 1H), 7.24 (s, 1H), 3.94 (s, 3H), 1.60 (q, *J* = 7.5 Hz, 2H), 0.62 (t, *J* = 7.5 Hz, 3H). <sup>13</sup>C NMR (126 MHz, CDCl<sub>3</sub>) δ 171.86, 158.01, 151.95, 147.75, 135.23, 133.43, 131.33, 129.43, 128.07, 127.75, 127.06, 126.50, 126.00, 125.63, 124.96, 119.41, 110.86, 31.11, 26.42, 8.13. HRMS-ESI calculated for C<sub>20</sub>H<sub>18</sub>N<sub>3</sub>O<sub>2</sub> [M+H]<sup>+</sup> 332.1394, found 332.1398.

### 7-methyl-4-(thiophen-2-yl)-7H-pyrrolo[2,3-d]pyrimidin-5-yl propionate (2l)

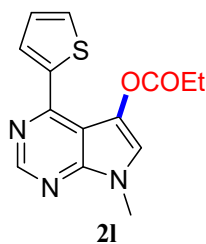

White solid (69 mg, 60% yield). Mp: 139-141 °C. <sup>1</sup>H NMR (400 MHz, CDCl<sub>3</sub>) δ 8.90 (s, 1H), 8.03 (dt, *J* = 3.0, 1.0 Hz, 1H), 7.73 (dt, *J* = 5.0, 1.0 Hz, 1H), 7.43-7.41 (m, 1H), 7.31 (s, 1H), 3.89 (s, 3H), 2.52 (q, *J* = 7.5 Hz, 2H), 1.16 (t, *J* = 7.5 Hz, 3H). <sup>13</sup>C NMR (101 MHz, CDCl<sub>3</sub>) δ 172.10, 153.17, 151.59, 148.33, 139.68, 128.57, 127.75, 126.92, 125.36, 119.28, 108.03, 31.08, 27.53, 8.77. HRMS-ESI calculated for C<sub>14</sub>H<sub>14</sub>N<sub>3</sub>O<sub>2</sub>S [M+H]<sup>+</sup> 288.0801, found 288.0802.

### 2-(7-methyl-7H-pyrrolo[2,3-d]pyrimidin-4-yl)phenyl acetate (3aa)

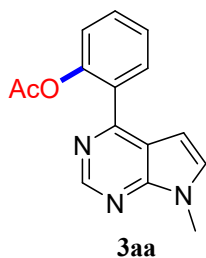

Yellow oil (95 mg, 89% yield). <sup>1</sup>H NMR (500 MHz, CDCl<sub>3</sub>) δ 8.97 (s, 1H), 7.79-7.78 (m, 1H), 7.63-7.53 (m, 1H), 7.42 (t, *J* = 1.2 Hz, 1H), 7.28 (t, *J* = 4.9 Hz, 1H), 7.22 (d, *J* = 3.6 Hz, 1H), 6.57 (d, *J* = 3.6 Hz, 1H), 3.93 (s, 3H), 2.07 (s, 3H). <sup>13</sup>C NMR (126 MHz, CDCl<sub>3</sub>) δ 169.30, 155.67, 151.50, 151.26, 148.38, 131.24, 130.54, 129.89, 126.15, 123.45, 117.16, 100.26, 31.22, 20.94 (one sp<sup>2</sup> signal were not observed because of overlapping). HRMS-ESI calculated for C<sub>15</sub>H<sub>14</sub>N<sub>3</sub>O<sub>2</sub> [M+H]<sup>+</sup> 268.1086, found 268.1085.

### 2-(7-propyl-7H-pyrrolo[2,3-d]pyrimidin-4-yl)phenyl acetate (3ab)

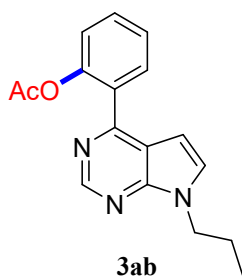

Yellow oil (98 mg, 83% yield). <sup>1</sup>H NMR (600 MHz, CDCl<sub>3</sub>) δ 8.94 (s, 1H), 7.79 (d, *J* = 7.6 Hz, 1H), 7.51 (t, *J* = 7.8 Hz, 1H), 7.39 (t, *J* = 7.5 Hz, 1H), 7.27 (t, *J* = 8.7 Hz, 1H), 7.24 (d, *J* = 3.5 Hz, 1H), 6.55 (d, *J* = 3.5 Hz, 1H), 4.28-4.24 (m, 2H), 2.05 (s, 3H), 1.92 (h, *J* = 7.3 Hz, 2H), 0.95 (t, *J* = 7.4 Hz, 3H). <sup>13</sup>C NMR (151 MHz, CDCl<sub>3</sub>) δ 169.31, 155.54, 151.17, 151.06, 148.35, 131.23, 130.86, 130.49, 128.99, 126.14, 123.44, 117.17, 100.10, 46.32, 23.55, 20.92, 11.30. HRMS-ESI calculated for C<sub>17</sub>H<sub>18</sub>N<sub>3</sub>O<sub>2</sub> [M+H]<sup>+</sup> 296.1394, found 296.1393.



### 2-(7-tosyl-7H-pyrrolo[2,3-d]pyrimidin-4-yl)phenyl acetate (3ac)

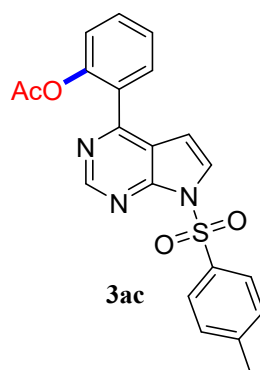

Yellow oil (142 mg, 87% yield).  $^1\text{H}$  NMR (600 MHz,  $\text{CDCl}_3$ )  $\delta$  8.99 (s, 1H), 8.06 (d,  $J = 8.4$  Hz, 2H), 7.68 (d,  $J = 4.0$  Hz, 1H), 7.58 (d,  $J = 7.7$  Hz, 1H), 7.45 (t,  $J = 7.8$  Hz, 1H), 7.31 (t,  $J = 7.6$  Hz, 1H), 7.26 (d,  $J = 8.2$  Hz, 2H), 7.19 (d,  $J = 2.3$  Hz, 1H), 6.59 (d,  $J = 4.0$  Hz, 1H), 2.33 (s, 3H), 1.94 (s, 3H).  $^{13}\text{C}$  NMR (151 MHz,  $\text{CDCl}_3$ )  $\delta$  169.09, 156.92, 153.01, 151.59, 148.23, 146.04, 134.74, 131.22, 131.12, 129.96, 129.75, 128.39, 126.78, 126.35, 123.62, 119.13, 104.42, 21.73, 20.86. HRMS-ESI calculated for  $\text{C}_{21}\text{H}_{18}\text{N}_3\text{O}_4\text{S}$   $[\text{M}+\text{H}]^+$  408.1013, found 408.1011.

### 2-(7-benzyl-7H-pyrrolo[2,3-d]pyrimidin-4-yl)phenyl acetate (3ad)

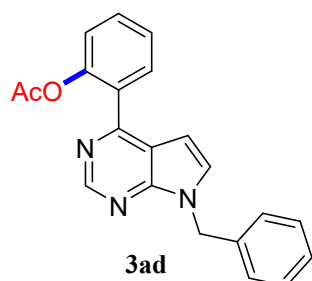

Yellow oil (115 mg, 84% yield).  $^1\text{H}$  NMR (500 MHz,  $\text{CDCl}_3$ )  $\delta$  9.00 (s, 1H), 7.81 (dd,  $J = 7.7, 1.7$  Hz, 1H), 7.53 (td,  $J = 7.9, 1.6$  Hz, 1H), 7.42 (td,  $J = 7.6, 1.0$  Hz, 1H), 7.38-7.31 (m, 3H), 7.31-7.28 (m, 1H), 7.28-7.27 (m, 1H), 7.26 (s, 1H), 7.22 (d,  $J = 3.6$  Hz, 1H), 6.60 (d,  $J = 3.6$  Hz, 1H), 5.51 (s, 2H), 2.08 (s, 3H).  $^{13}\text{C}$  NMR (101 MHz,  $\text{CDCl}_3$ )  $\delta$  169.36, 155.76, 151.46, 148.37, 136.76, 131.26, 130.77, 130.61, 128.97, 128.92, 128.82, 128.05, 127.66, 126.20, 123.50, 117.10, 100.90, 48.02, 20.96. HRMS-ESI calculated for  $\text{C}_{21}\text{H}_{18}\text{N}_3\text{O}_2$   $[\text{M}+\text{H}]^+$  344.1394, found 344.1397.

### 2-(7-((2-(trimethylsilyl)ethoxy)methyl)-7H-pyrrolo[2,3-d]pyrimidin-4-yl)phenyl acetate (3ae)

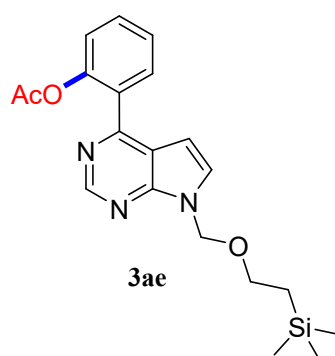

Yellow oil (121 mg, 79% yield).  $^1\text{H}$  NMR (600 MHz,  $\text{CDCl}_3$ )  $\delta$  8.99 (s, 1H), 7.79 (dd,  $J = 7.7, 1.6$  Hz, 1H), 7.54 (td,  $J = 7.8, 1.6$  Hz, 1H), 7.42 (t,  $J = 7.2$  Hz, 1H), 7.39 (d,  $J = 3.7$  Hz, 1H), 7.30-7.27 (m, 1H), 6.63 (d,  $J = 3.7$  Hz, 1H), 5.70 (s, 2H), 3.61-3.57 (m, 2H), 2.06 (s, 3H), 0.96-0.92 (m, 2H), -0.04 (s, 9H).  $^{13}\text{C}$  NMR (151 MHz,  $\text{CDCl}_3$ )  $\delta$  169.21, 155.85, 152.02, 151.60, 148.33, 131.23, 130.69, 130.57, 128.77, 126.20, 123.45, 117.23, 101.65, 72.90, 66.64, 20.90, 17.73, -1.44. HRMS-ESI calculated for  $\text{C}_{20}\text{H}_{26}\text{N}_3\text{O}_3\text{Si}$   $[\text{M}+\text{H}]^+$  384.1738, found 384.1744.

### 2-(7-acetyl-7H-pyrrolo[2,3-d]pyrimidin-4-yl)phenyl acetate (3af)

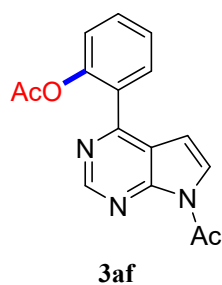

Yellow oil (91 mg, 77% yield).  $^1\text{H}$  NMR (400 MHz,  $\text{CDCl}_3$ )  $\delta$  9.07 (s, 1H), 8.03 (d,  $J = 4.1$  Hz, 1H), 7.75 (dd,  $J = 7.7, 1.6$  Hz, 1H), 7.58 (td,  $J = 7.9, 1.6$  Hz, 1H), 7.45 (td,  $J = 7.6, 1.0$  Hz, 1H), 7.30 (d,  $J = 8.1$  Hz, 1H), 6.72 (d,  $J = 4.1$  Hz, 1H), 3.12 (s, 3H), 2.09 (s, 3H).  $^{13}\text{C}$  NMR (101 MHz,  $\text{CDCl}_3$ )  $\delta$  169.15, 168.65, 156.64, 152.58, 152.27, 148.22, 131.17, 131.16, 129.92, 126.41, 125.99, 123.56, 119.94, 105.04, 26.00, 20.95. HRMS-ESI calculated for  $\text{C}_{16}\text{H}_{14}\text{N}_3\text{O}_3\text{Na}$   $[\text{M}+\text{H}]^+$  296.1030, found 296.1022.

### 5-methyl-2-(7-methyl-7H-pyrrolo[2,3-d]pyrimidin-4-yl)phenyl acetate (3ba)

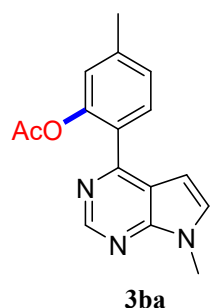

Yellow oil (99 mg, 88% yield).  $^1\text{H}$  NMR (500 MHz,  $\text{CDCl}_3$ )  $\delta$  8.94 (s, 1H), 7.68 (d,  $J = 7.8$  Hz, 1H), 7.23-7.20 (m, 1H), 7.19 (d,  $J = 3.5$  Hz, 1H), 7.08 (s, 1H), 6.56 (d,  $J = 3.6$  Hz, 1H), 3.90 (s, 3H), 2.45 (s, 3H), 2.06 (s, 3H).  $^{13}\text{C}$  NMR (126 MHz,  $\text{CDCl}_3$ )  $\delta$  169.36, 155.71, 151.41, 151.16, 148.21, 141.13, 130.98, 129.68, 127.88, 126.95, 123.91, 117.02, 100.28, 31.13, 21.26, 20.90. HRMS-ESI calculated for  $\text{C}_{16}\text{H}_{16}\text{N}_3\text{O}_2$   $[\text{M}+\text{H}]^+$  282.1242, found 282.1249.

### 5-(tert-butyl)-2-(7-methyl-7H-pyrrolo[2,3-d]pyrimidin-4-yl)phenyl acetate (3bb)

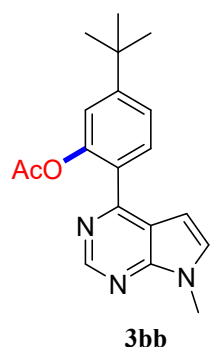

Yellow oil (97 mg, 75% yield).  $^1\text{H}$  NMR (500 MHz,  $\text{CDCl}_3$ )  $\delta$  8.95 (s, 1H), 7.73 (d,  $J = 8.1$  Hz, 1H), 7.43 (dd,  $J = 8.1, 1.9$  Hz, 1H), 7.25 (d,  $J = 1.9$  Hz, 1H), 7.20 (d,  $J = 3.6$  Hz, 1H), 6.60 (dd,  $J = 3.5, 0.7$  Hz, 1H), 3.91 (d,  $J = 0.9$  Hz, 3H), 2.07 (s, 3H), 1.38 (s, 9H).  $^{13}\text{C}$  NMR (126 MHz,  $\text{CDCl}_3$ )  $\delta$  169.31, 155.78, 154.46, 151.45, 151.18, 148.16, 130.77, 129.63, 128.81, 127.84, 123.23, 120.39, 116.90, 100.36, 34.90, 31.14, 20.96. HRMS-ESI calculated for  $\text{C}_{19}\text{H}_{22}\text{N}_3\text{O}_2$   $[\text{M}+\text{H}]^+$  324.1707, found 324.1712.

### 5-methoxy-2-(7-methyl-7H-pyrrolo[2,3-d]pyrimidin-4-yl)phenyl acetate (3bc)

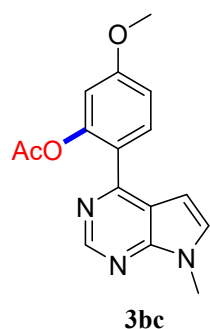

Yellow oil (107 mg, 90% yield).  $^1\text{H}$  NMR (500 MHz,  $\text{CDCl}_3$ )  $\delta$  8.94 (s, 1H), 7.75 (d,  $J = 8.6$  Hz, 1H), 7.20 (d,  $J = 3.5$  Hz, 1H), 6.97-6.95 (m, 1H), 6.81 (d,  $J = 2.5$  Hz, 1H), 6.59 (d,  $J = 3.5$  Hz, 1H), 3.91 (s, 3H), 3.89 (s, 3H), 2.09 (s, 3H).  $^{13}\text{C}$  NMR (126 MHz,  $\text{CDCl}_3$ )  $\delta$  161.43, 155.62, 151.23, 149.55, 132.11, 130.89, 129.58, 128.83, 123.34, 116.88, 112.17, 109.08, 100.38, 55.64, 29.71, 20.98. HRMS-ESI calculated for  $\text{C}_{16}\text{H}_{16}\text{N}_3\text{O}_3$   $[\text{M}+\text{H}]^+$  298.1191, found 298.1188.

### 5-cyano-2-(7-methyl-7H-pyrrolo[2,3-d]pyrimidin-4-yl)phenyl acetate (3bd)

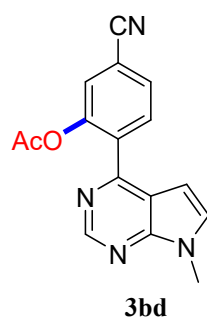

Yellow oil (79 mg, 68% yield).  $^1\text{H}$  NMR (500 MHz,  $\text{CDCl}_3$ )  $\delta$  8.99 (s, 1H), 7.91 (d,  $J = 8.0$  Hz, 1H), 7.71 (dd,  $J = 8.0, 1.5$  Hz, 1H), 7.60 (d,  $J = 1.5$  Hz, 1H), 7.31-7.26 (m, 1H), 6.52 (d,  $J = 3.6$  Hz, 1H), 3.95 (s, 3H), 2.09 (s, 3H).  $^{13}\text{C}$  NMR (101 MHz,  $\text{CDCl}_3$ )  $\delta$  168.63, 153.46, 151.62, 151.23, 148.53, 135.66, 132.22, 130.83, 129.71, 127.41, 117.62, 117.04, 114.05, 99.71, 31.35, 20.80. HRMS-ESI calculated for  $\text{C}_{16}\text{H}_{13}\text{N}_4\text{O}_2$   $[\text{M}+\text{H}]^+$  293.1033, found 293.1042.

### 2-(7-methyl-7H-pyrrolo[2,3-d]pyrimidin-4-yl)-5-(trifluoromethyl)phenyl acetate (3be)

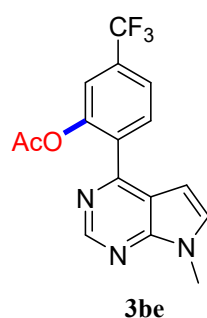

Yellow oil (88 mg, 66% yield).  $^1\text{H}$  NMR (500 MHz,  $\text{CDCl}_3$ )  $\delta$  8.99 (s, 1H), 7.91 (d,  $J = 8.0$  Hz, 1H), 7.67 (dd,  $J = 8.1$  Hz, 1H), 7.56 (s, 1H), 7.26 (d,  $J = 3.6$  Hz, 1H), 6.54 (d,  $J = 3.6$  Hz, 1H), 3.94 (s, 3H), 2.08 (s, 3H).  $^{13}\text{C}$  NMR (126 MHz,  $\text{CDCl}_3$ )  $\delta$  168.75, 154.12, 151.61, 151.26, 148.51, 134.41, 132.55 ( $J_{\text{C-F}} = 34.0$  Hz), 131.89, 130.48, 124.48, 122.92 ( $J_{\text{C-F}} = 3.8$  Hz), 120.93 ( $J_{\text{C-F}} = 3.8$  Hz), 117.10, 99.86, 31.26, 20.78. HRMS-ESI calculated for  $\text{C}_{16}\text{H}_{13}\text{F}_3\text{N}_3\text{O}_2$   $[\text{M}+\text{H}]^+$  336.0960, found 336.0966.

### 5-fluoro-2-(7-methyl-7H-pyrrolo[2,3-d]pyrimidin-4-yl)phenyl acetate (3bf)

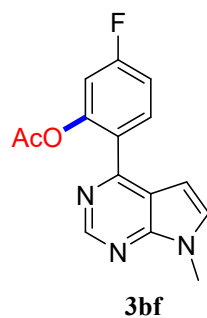

Yellow oil (89 mg, 78% yield).  $^1\text{H}$  NMR (500 MHz,  $\text{CDCl}_3$ )  $\delta$  8.94 (s, 1H), 7.76 (dd,  $J = 8.6, 6.3$  Hz, 1H), 7.21 (d,  $J = 3.6$  Hz, 1H), 7.13-7.09 (m, 1H), 7.03 (dd,  $J = 9.1, 2.5$  Hz, 1H), 6.52 (d,  $J = 3.5$  Hz, 1H), 3.90 (s, 3H), 2.05 (s, 3H).  $^{13}\text{C}$  NMR (126 MHz,  $\text{CDCl}_3$ )  $\delta$  168.79, 163.36 ( $J_{\text{C-F}} = 252$  Hz), 154.79, 151.24, 149.38 ( $J_{\text{C-F}} = 11.34$  Hz), 132.42 ( $J_{\text{C-F}} = 8.8$  Hz), 130.04, 127.16, 119.66, 117.06, 113.41 ( $J_{\text{C-F}} = 21.4$  Hz), 111.36 ( $J_{\text{C-F}} = 25.2$  Hz), 100.06, 31.24, 20.85. HRMS-ESI calculated for  $\text{C}_{15}\text{H}_{13}\text{FN}_3\text{O}_2$   $[\text{M}+\text{H}]^+$  286.0992, found 286.0993.

### 5-chloro-2-(7-methyl-7H-pyrrolo[2,3-d]pyrimidin-4-yl)phenyl acetate (3bg)

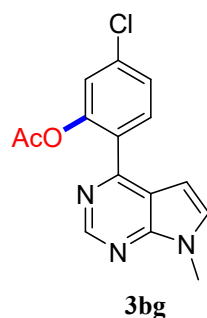

Yellow oil (81 mg, 67% yield).  $^1\text{H}$  NMR (500 MHz,  $\text{CDCl}_3$ )  $\delta$  8.99 (s, 1H), 8.08 (d,  $J = 2.0$  Hz, 1H), 7.78 (dd,  $J = 8.5$  Hz, 1H), 7.41 (d,  $J = 8.5$  Hz, 1H), 7.26 (d,  $J = 3.6$  Hz, 1H), 6.54 (d,  $J = 3.6$  Hz, 1H), 3.93 (s, 3H), 2.08 (s, 3H).  $^{13}\text{C}$  NMR (126 MHz,  $\text{CDCl}_3$ )  $\delta$  168.68, 153.97, 151.56, 151.24, 150.84, 131.58, 130.51, 128.65, 128.42, 127.43, 124.18, 117.06, 99.79, 31.24, 20.83. HRMS-ESI calculated for  $\text{C}_{15}\text{H}_{13}\text{ClN}_3\text{O}_2$   $[\text{M}+\text{H}]^+$  302.0691, found 302.0680.

#### 4-(7-methyl-7H-pyrrolo[2,3-d]pyrimidin-4-yl)-[1,1'-biphenyl]-3-yl acetate (3bh)

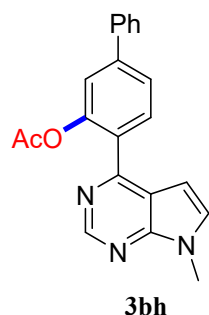

Yellow oil (87 mg, 63% yield).  $^1\text{H}$  NMR (600 MHz,  $\text{CDCl}_3$ )  $\delta$  9.00 (s, 1H), 7.89 (d,  $J = 8.0$  Hz, 1H), 7.69-7.65 (m, 3H), 7.52-7.47 (m, 3H), 7.41 (t,  $J = 7.4$  Hz, 1H), 7.24 (d,  $J = 3.5$  Hz, 1H), 6.64 (d,  $J = 3.5$  Hz, 1H), 3.94 (s, 3H), 2.12 (s, 3H).  $^{13}\text{C}$  NMR (151 MHz,  $\text{CDCl}_3$ )  $\delta$  169.32, 155.39, 151.51, 151.24, 148.75, 143.82, 139.55, 131.65, 129.96, 129.52, 128.93, 128.08, 127.22, 124.78, 122.06, 117.07, 100.32, 31.24, 21.00. HRMS-ESI calculated for  $\text{C}_{21}\text{H}_{18}\text{N}_3\text{O}_2$   $[\text{M}+\text{H}]^+$  344.1394, found 344.1389.

#### 4-methoxy-2-(7-methyl-7H-pyrrolo[2,3-d]pyrimidin-4-yl)phenyl acetate (3ca)

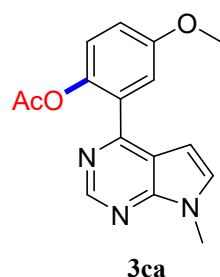

Yellow oil (101 mg, 85% yield).  $^1\text{H}$  NMR (500 MHz,  $\text{CDCl}_3$ )  $\delta$  8.96 (s, 1H), 7.29 (d,  $J = 3.1$  Hz, 1H), 7.21 (d,  $J = 3.6$  Hz, 1H), 7.18 (d,  $J = 8.9$  Hz, 1H), 7.06-7.03 (m, 1H), 6.58 (d,  $J = 3.5$  Hz, 1H), 3.91 (s, 3H), 3.86 (s, 3H), 2.03 (s, 3H).  $^{13}\text{C}$  NMR (126 MHz,  $\text{CDCl}_3$ )  $\delta$  169.63, 157.31, 155.45, 151.46, 151.21, 141.82, 131.45, 129.92, 124.23, 117.07, 116.16, 115.75, 100.27, 55.76, 31.19, 20.84. ESI calculated for  $\text{C}_{16}\text{H}_{16}\text{N}_3\text{O}_3$   $[\text{M}+\text{H}]^+$  298.1191, found 298.1191.

#### 4-methyl-2-(7-methyl-7H-pyrrolo[2,3-d]pyrimidin-4-yl)phenyl acetate (3cb)

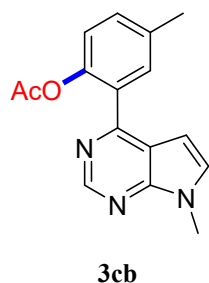

Yellow oil (96 mg, 85% yield).  $^1\text{H}$  NMR (600 MHz,  $\text{CDCl}_3$ )  $\delta$  8.98 (s, 1H), 7.59 (d,  $J = 1.8$  Hz, 1H), 7.33 (dd,  $J = 8.2, 2.0$  Hz, 1H), 7.22 (d,  $J = 3.5$  Hz, 1H), 7.16 (d,  $J = 8.2$  Hz, 1H), 6.57 (d,  $J = 3.5$  Hz, 1H), 3.92 (s, 3H), 2.44 (s, 3H), 2.04 (s, 3H).  $^{13}\text{C}$  NMR (151 MHz,  $\text{CDCl}_3$ )  $\delta$  169.48, 155.63, 151.37, 151.17, 146.08, 135.93, 131.59, 131.22, 130.29, 129.89, 123.06, 117.13, 100.40, 31.23, 20.94, 20.92. HRMS-ESI calculated for  $\text{C}_{16}\text{H}_{16}\text{N}_3\text{O}_2$   $[\text{M}+\text{H}]^+$  282.1237, found 282.1233.

#### 4-cyano-2-(7-methyl-7H-pyrrolo[2,3-d]pyrimidin-4-yl)phenyl acetate (3cc)

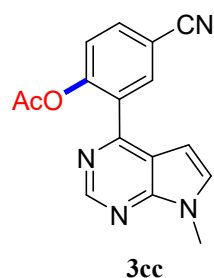

Yellow oil (76 mg, 65% yield).  $^1\text{H}$  NMR (500 MHz,  $\text{CDCl}_3$ )  $\delta$  8.98 (s, 1H), 8.11 (d,  $J = 2.0$  Hz, 1H), 7.82 (dd,  $J = 8.4, 2.1$  Hz, 1H), 7.42 (d,  $J = 8.4$  Hz, 1H), 7.29 (d,  $J = 3.6$  Hz, 1H), 6.53 (d,  $J = 3.5$  Hz, 1H), 3.95 (s, 3H), 2.09 (s, 3H).  $^{13}\text{C}$  NMR (126 MHz,  $\text{CDCl}_3$ )  $\delta$  168.39, 153.12, 151.67, 151.64, 151.27, 135.38, 134.00, 132.44, 130.77, 124.86, 117.89, 117.00, 110.39, 99.62, 31.32, 20.85. HRMS-ESI calculated for  $\text{C}_{16}\text{H}_{13}\text{N}_4\text{O}_2$   $[\text{M}+\text{H}]^+$  293.1038, found 293.1032.

**2-(7-methyl-7H-pyrrolo[2,3-d]pyrimidin-4-yl)-4-(trifluoromethyl)phenyl acetate (3cd)**

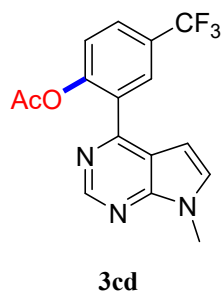

Yellow oil (102 mg, 76% yield). <sup>1</sup>H NMR (400 MHz, CDCl<sub>3</sub>) δ 8.99 (s, 1H), 8.09 (d, *J* = 2.3 Hz, 1H), 7.79 (dd, *J* = 8.5, 2.3 Hz, 1H), 7.42 (d, *J* = 8.5 Hz, 1H), 7.27 (d, *J* = 3.6 Hz, 1H), 6.55 (d, *J* = 3.5 Hz, 1H), 3.94 (s, 3H), 2.09 (s, 3H). <sup>13</sup>C NMR (101 MHz, CDCl<sub>3</sub>) δ 168.72, 153.99, 151.59, 151.27, 150.86 (*J*<sub>C-F</sub> = 1.01 Hz), 131.61, 130.51, 128.65 (*J*<sub>C-F</sub> = 8.08 Hz), 128.41, 127.44 (*J*<sub>C-F</sub> = 7.07 Hz), 124.21, 123.71 (*J*<sub>C-F</sub> = 273.71 Hz), 117.06, 99.80, 31.27, 20.87. HRMS-ESI calculated for C<sub>16</sub>H<sub>13</sub>F<sub>3</sub>N<sub>3</sub>O<sub>2</sub> [M+H]<sup>+</sup> 336.0960, found 336.0956.

**4-bromo-2-(7-methyl-7H-pyrrolo[2,3-d]pyrimidin-4-yl)phenyl acetate (3ce)**

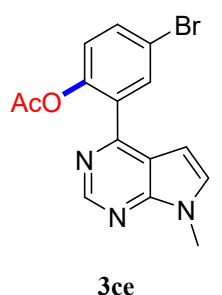

Yellow oil (116 mg, 84% yield). <sup>1</sup>H NMR (400 MHz, CDCl<sub>3</sub>) δ 8.97 (s, 1H), 7.92 (d, *J* = 2.5 Hz, 1H), 7.64 (dd, *J* = 8.6, 2.5 Hz, 1H), 7.25 (d, *J* = 3.6 Hz, 1H), 7.17 (d, *J* = 8.6 Hz, 1H), 6.56 (d, *J* = 3.5 Hz, 1H), 3.93 (s, 3H), 2.06 (s, 3H). <sup>13</sup>C NMR (101 MHz, CDCl<sub>3</sub>) δ 168.93, 153.99, 151.54, 151.22, 147.40, 133.93, 133.36, 132.70, 130.33, 125.18, 119.19, 117.02, 99.97, 31.26, 20.85. HRMS-ESI calculated for C<sub>15</sub>H<sub>13</sub>BrN<sub>3</sub>O<sub>2</sub> [M+H]<sup>+</sup> 346.0186, found 346.0179.

**4-chloro-2-(7-methyl-7H-pyrrolo[2,3-d]pyrimidin-4-yl)phenyl acetate (3cf)**

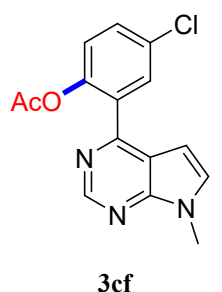

Yellow oil (99 mg, 82% yield). <sup>1</sup>H NMR (500 MHz, CDCl<sub>3</sub>) δ 8.97 (s, 1H), 7.77 (d, *J* = 2.6 Hz, 1H), 7.48 (dd, *J* = 8.7, 2.6 Hz, 1H), 7.25 (d, *J* = 3.6 Hz, 1H), 7.22 (d, *J* = 8.7 Hz, 1H), 6.57 (d, *J* = 3.6 Hz, 1H), 3.93 (s, 3H), 2.06 (s, 3H). <sup>13</sup>C NMR (126 MHz, CDCl<sub>3</sub>) δ 169.04, 154.10, 151.55, 151.22, 146.83, 132.32, 131.57, 131.01, 130.38, 130.32, 124.85, 117.00, 99.96, 31.26, 20.86. HRMS-ESI calculated for C<sub>15</sub>H<sub>13</sub>ClN<sub>3</sub>O<sub>2</sub> [M+H]<sup>+</sup> 302.0691, found 302.0677.

**3-methoxy-2-(7-methyl-7H-pyrrolo[2,3-d]pyrimidin-4-yl)phenyl acetate (3da)**

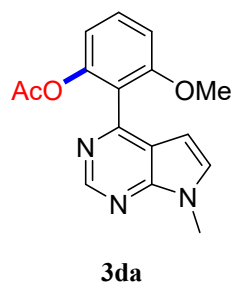

Yellow oil (74 mg, 62% yield). <sup>1</sup>H NMR (500 MHz, CDCl<sub>3</sub>) δ 8.98 (s, 1H), 7.45 (t, *J* = 8.3 Hz, 1H), 7.15 (d, *J* = 3.5 Hz, 1H), 6.95 (d, *J* = 8.5 Hz, 1H), 6.88 (dd, *J* = 8.2, 0.8 Hz, 1H), 6.32 (d, *J* = 3.5 Hz, 1H), 3.91 (s, 3H), 3.75 (s, 3H), 1.89 (s, 3H). <sup>13</sup>C NMR (126 MHz, CDCl<sub>3</sub>) δ 169.06, 158.19, 153.35, 151.04, 151.01, 149.41, 130.36, 129.63, 120.23, 118.99, 115.51, 108.87, 100.36, 56.03, 31.11, 20.65. HRMS-ESI calculated for C<sub>16</sub>H<sub>16</sub>N<sub>3</sub>O<sub>3</sub> [M+H]<sup>+</sup> 298.1186, found 298.1197.

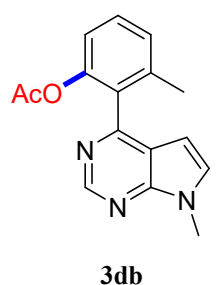

**3-methyl-2-(7-methyl-7H-pyrrolo[2,3-d]pyrimidin-4-yl)phenyl acetate (3db)**

Yellow oil (64 mg, 57% yield).  $^1\text{H NMR}$  (500 MHz,  $\text{CDCl}_3$ )  $\delta$  8.91 (s, 1H), 7.38 – 7.32 (m, 1H), 7.30 – 7.26 (m, 3H), 7.14 (s, 1H), 3.89 (s, 3H), 2.22 (s, 3H), 1.70 (s, 3H).  $^{13}\text{C NMR}$  (126 MHz,  $\text{CDCl}_3$ )  $\delta$  168.94, 159.03, 151.46, 147.94, 136.53, 136.45, 130.27, 129.35, 128.97, 127.18, 125.28, 119.47, 110.13, 31.05, 19.75, 19.55. HRMS-ESI calculated for  $\text{C}_{16}\text{H}_{16}\text{N}_3\text{O}_2$   $[\text{M}+\text{H}]^+$  282.1237, found 282.1243.

### 3-chloro-2-(7-methyl-7H-pyrrolo[2,3-d]pyrimidin-4-yl)phenyl acetate (3dc)

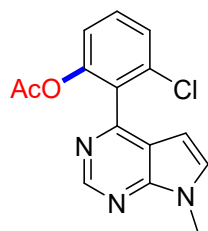

3dc

Yellow oil (52 mg, 43% yield).  $^1\text{H NMR}$  (400 MHz,  $\text{CDCl}_3$ )  $\delta$  9.01 (s, 1H), 7.46 (s, 1H), 7.45 (s, 1H), 7.23-7.18 (m, 2H), 6.34 (d,  $J = 3.6$  Hz, 1H), 3.94 (s, 3H), 1.88 (s, 3H).  $^{13}\text{C NMR}$  (101 MHz,  $\text{CDCl}_3$ )  $\delta$  168.82, 153.36, 151.20, 151.11, 149.44, 133.95, 130.36, 130.28, 130.21, 127.45, 121.83, 118.36, 99.95, 31.21, 20.56. HRMS-ESI calculated for  $\text{C}_{15}\text{H}_{13}\text{ClN}_3\text{O}_2$   $[\text{M}+\text{H}]^+$  302.0691, found 302.0685.

### 3-fluoro-2-(7-methyl-7H-pyrrolo[2,3-d]pyrimidin-4-yl)phenyl acetate (3dd)

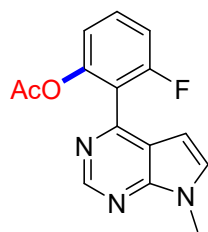

3dd

Yellow oil (64 mg, 56% yield).  $^1\text{H NMR}$  (400 MHz,  $\text{CDCl}_3$ )  $\delta$  8.99 (s, 1H), 7.48 (q,  $J = 7.9$  Hz, 1H), 7.21 (d,  $J = 3.1$  Hz, 1H), 7.15 (t,  $J = 8.8$  Hz, 1H), 7.09 (d,  $J = 8.2$  Hz, 1H), 6.42 (s, 1H), 3.90 (s, 3H), 1.99 (s, 3H).  $^{13}\text{C NMR}$  (101 MHz,  $\text{CDCl}_3$ )  $\delta$  168.93, 161.70, 159.20, 150.96, 150.85 ( $J_{\text{C-F}} = 1.01$  Hz), 149.47 ( $J_{\text{C-F}} = 6.06$  Hz), 130.71 ( $J_{\text{C-F}} = 10.1$  Hz), 130.37, 119.64 ( $J_{\text{C-F}} = 17.17$  Hz), 119.27 ( $J_{\text{C-F}} = 3.03$  Hz), 118.70, 113.64 ( $J_{\text{C-F}} = 22.22$  Hz), 100.04 ( $J_{\text{C-F}} = 4.04$  Hz), 31.18, 20.67. HRMS-ESI calculated for  $\text{C}_{15}\text{H}_{13}\text{FN}_3\text{O}_2$   $[\text{M}+\text{H}]^+$  286.0986, found 286.0983.

### 2-(7-methyl-7H-pyrrolo[2,3-d]pyrimidin-4-yl)-1,3-phenylene diacetate (3df)

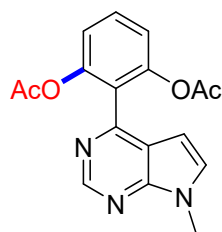

3df

Yellow oil (88 mg, 68% yield).  $^1\text{H NMR}$  (500 MHz,  $\text{CDCl}_3$ )  $\delta$  8.96 (s, 1H), 7.51 (t,  $J = 8.3$  Hz, 1H), 7.19 (d,  $J = 2.9$  Hz, 2H), 7.17 (s, 1H), 6.36 (d,  $J = 3.5$  Hz, 1H), 3.90 (s, 3H), 1.90 (s, 6H).  $^{13}\text{C NMR}$  (126 MHz,  $\text{CDCl}_3$ )  $\delta$  168.71, 152.01, 151.07, 150.93, 149.15, 130.29, 130.04, 124.21, 120.68, 118.47, 99.93, 31.17, 20.65. HRMS-ESI calculated for  $\text{C}_{17}\text{H}_{16}\text{N}_3\text{O}_4$   $[\text{M}+\text{H}]^+$  326.1135, found 326.1143.

### 4,5-difluoro-2-(7-methyl-7H-pyrrolo[2,3-d]pyrimidin-4-yl)phenyl acetate (3e)

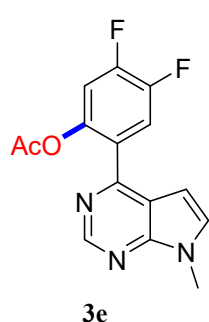

Yellow oil (88 mg, 73% yield).  $^1\text{H}$  NMR (500 MHz,  $\text{CDCl}_3$ )  $\delta$  8.96 (s, 1H), 7.31 – 7.28 (m, 1H), 7.26 (d,  $J = 3.6$  Hz, 1H), 7.10 – 7.05 (m, 1H), 6.56 (d,  $J = 3.6$  Hz, 1H), 3.93 (s, 3H), 2.12 (s, 3H).  $^{13}\text{C}$  NMR (126 MHz,  $\text{CDCl}_3$ )  $\delta$  168.06, 159.72 ( $J_{\text{C-F}} = 248.22$  Hz), 155.13 ( $J_{\text{C-F}} = 253.26$  Hz), 153.16 ( $J_{\text{C-F}} = 3.78$  Hz), 151.63, 151.14, 133.85 ( $J_{\text{C-F}} = 8.82$  Hz), 132.93 ( $J_{\text{C-F}} = 13.86$  Hz), 130.58, 117.05, 112.90 ( $J_{\text{C-F}} = 23.94$  Hz), 105.80 ( $J_{\text{C-F}} = 26.46$  Hz), 99.79, 31.25, 20.27. HRMS-ESI calculated for  $\text{C}_{15}\text{H}_{12}\text{F}_2\text{N}_3\text{O}_2$   $[\text{M}+\text{H}]^+ 304.0897$ , found 304.0893.

### 2,4-difluoro-6-(7-methyl-7H-pyrrolo[2,3-d]pyrimidin-4-yl)phenyl acetate (3f)

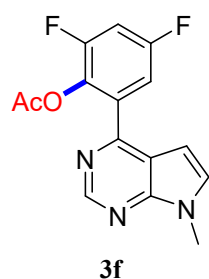

Yellow oil (85 mg, 70% yield).  $^1\text{H}$  NMR (500 MHz,  $\text{CDCl}_3$ )  $\delta$  8.94 (s, 1H), 7.62 (dd,  $J = 10.5, 8.6$  Hz, 1H), 7.25 (t,  $J = 3.6$  Hz, 1H), 7.14 (dd,  $J = 10.4, 6.9$  Hz, 1H), 6.54 (d,  $J = 3.6$  Hz, 1H), 3.92 (s, 3H), 2.05 (s, 3H).  $^{13}\text{C}$  NMR (126 MHz,  $\text{CDCl}_3$ )  $\delta$  168.41, 151.62, 151.57, 151.22, 147.99 ( $J_{\text{C-F}} = 54.18$  Hz), 130.41, 126.58, 119.95, 119.68 ( $J_{\text{C-F}} = 84.42$  Hz), 113.58 ( $J_{\text{C-F}} = 75.60$  Hz), 112.47, 109.48, 99.82, 31.13, 20.64. HRMS-ESI calculated for  $\text{C}_{15}\text{H}_{11}\text{F}_2\text{N}_3\text{O}_2$   $[\text{M}+\text{H}]^+ 304.0897$ , found 304.0893.

### 1-(7-methyl-7H-pyrrolo[2,3-d]pyrimidin-4-yl)naphthalen-2-yl acetate (3g)

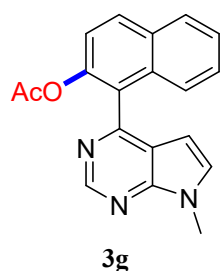

Yellow oil (94 mg, 74% yield).  $^1\text{H}$  NMR (500 MHz,  $\text{CDCl}_3$ )  $\delta$  9.10 (s, 1H), 8.02 (d,  $J = 8.9$  Hz, 1H), 7.93 (d,  $J = 8.8$  Hz, 1H), 7.49 (dd,  $J = 7.8, 6.3$  Hz, 2H), 7.40 (d,  $J = 8.9$  Hz, 2H), 7.17 (d,  $J = 3.6$  Hz, 1H), 6.22 (d,  $J = 3.6$  Hz, 1H), 3.97 (s, 3H), 1.95 (s, 3H).  $^{13}\text{C}$  NMR (126 MHz,  $\text{CDCl}_3$ )  $\delta$  169.36, 154.78, 151.37, 151.14, 146.18, 132.16, 131.77, 130.53, 130.13, 128.16, 126.96, 125.85, 125.83, 125.65, 121.80, 119.29, 100.21, 31.23, 20.77. HRMS-ESI calculated for  $\text{C}_{19}\text{H}_{16}\text{N}_3\text{O}_2$   $[\text{M}+\text{H}]^+ 318.1237$ , found 318.1248.

### 2-(7-methyl-7H-pyrrolo[2,3-d]pyrimidin-4-yl)thiophen-3-yl acetate (3h)

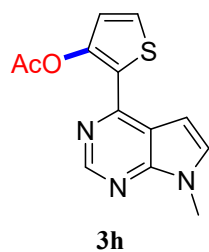

Yellow oil (84 mg, 77% yield).  $^1\text{H}$  NMR (400 MHz,  $\text{CDCl}_3$ )  $\delta$  8.88 (s, 1H), 7.50 (d,  $J = 5.4$  Hz, 1H), 7.23 (d,  $J = 3.6$  Hz, 1H), 7.06 (d,  $J = 5.4$  Hz, 1H), 6.84 (d,  $J = 3.6$  Hz, 1H), 3.90 (s, 3H), 2.30 (s, 3H).  $^{13}\text{C}$  NMR (101 MHz,  $\text{CDCl}_3$ )  $\delta$  168.56, 151.84, 151.02, 149.91, 145.79, 129.65, 127.19, 123.73, 120.37, 114.97, 100.61, 31.22, 21.05. HRMS-ESI calculated for  $\text{C}_{13}\text{H}_{12}\text{N}_3\text{O}_2\text{S}$   $[\text{M}+\text{H}]^+ 274.0645$ , found 274.0647.

### 2-(7-methyl-7H-pyrrolo[2,3-d]pyrimidin-4-yl)phenyl propionate (3k)

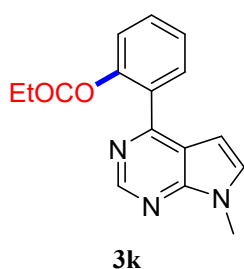

Yellow oil (88 mg, 78% yield).  $^1\text{H}$  NMR (400 MHz,  $\text{CDCl}_3$ )  $\delta$  8.94 (s, 1H), 7.80-7.66 (m, 1H), 7.50 (t,  $J = 7.8$  Hz, 1H), 7.38 (t,  $J = 7.6$  Hz, 1H), 7.25 (d,  $J = 8.1$  Hz, 1H), 7.18 (d,  $J = 3.5$  Hz, 1H), 6.53 (d,  $J = 3.5$  Hz, 1H), 3.88 (s, 3H), 2.33 (q,  $J = 7.6$  Hz, 2H), 1.02 (t,  $J = 7.6$  Hz, 3H).  $^{13}\text{C}$  NMR (101 MHz,  $\text{CDCl}_3$ )  $\delta$  172.66, 155.64, 151.35, 151.11, 148.40, 131.14, 130.75, 130.48, 129.97, 126.00, 123.44, 117.16, 100.25, 31.18, 27.53, 8.76. HRMS-ESI calculated for  $\text{C}_{16}\text{H}_{16}\text{N}_3\text{O}_2$   $[\text{M}+\text{H}]^+$  282.1237, found 282.1240.

**2-(7-methyl-7H-pyrrolo[2,3-d]pyrimidin-4-yl)thiophen-3-yl propionate (3l)**

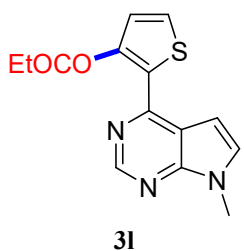

Yellow oil (80 mg, 70% yield).  $^1\text{H}$  NMR (500 MHz,  $\text{CDCl}_3$ )  $\delta$  8.87 (s, 1H), 7.49 (d,  $J = 5.4$  Hz, 1H), 7.21 (d,  $J = 3.6$  Hz, 1H), 7.05 (d,  $J = 5.4$  Hz, 1H), 6.82 (d,  $J = 3.6$  Hz, 1H), 3.88 (s, 3H), 2.60 (q,  $J = 7.5$  Hz, 2H), 1.19 (d,  $J = 7.5$  Hz, 3H).  $^{13}\text{C}$  NMR (126 MHz,  $\text{CDCl}_3$ )  $\delta$  172.03, 151.76, 150.87, 149.87, 145.99, 129.70, 127.18, 123.77, 115.00, 100.72, 31.23, 27.64, 8.82. HRMS-ESI calculated for  $\text{C}_{14}\text{H}_{14}\text{N}_3\text{O}_2\text{S}$   $[\text{M}+\text{H}]^+$  288.0801, found 288.0798.

**2-(5-bromo-7-methyl-7H-pyrrolo[2,3-d]pyrimidin-4-yl)phenyl acetate (4)**

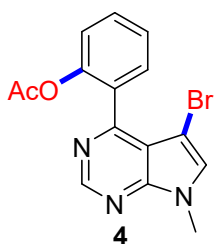

Colorless liquid (427 mg, 65% yield).  $^1\text{H}$  NMR (400 MHz,  $\text{CDCl}_3$ )  $\delta$  8.96 (s, 1H), 7.53 (td,  $J = 7.7, 1.5$  Hz, 2H), 7.38 (td,  $J = 7.4, 1.2$  Hz, 1H), 7.35 – 7.30 (m, 1H), 7.27 (s, 1H), 3.91 (s, 3H), 1.98 (s, 3H).  $^{13}\text{C}$  NMR (101 MHz,  $\text{CDCl}_3$ )  $\delta$  168.84, 156.57, 151.39, 150.59, 148.57, 132.10, 130.52, 129.95, 129.13, 125.26, 122.59, 115.36, 87.80, 31.33, 20.77. HRMS-ESI calculated for  $\text{C}_{15}\text{H}_{12}\text{BrN}_3\text{O}_2$   $[\text{M}+\text{H}]^+$  345.0113, found 346.0186.

**2-(5-bromo-7-methyl-7H-pyrrolo[2,3-d]pyrimidin-4-yl)phenol (5)**

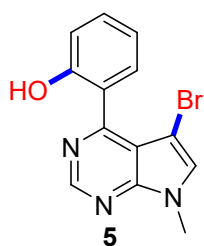

White solid (110 mg, 73% yield). Mp: 122–125 °C.  $^1\text{H}$  NMR (400 MHz,  $\text{CDCl}_3$ )  $\delta$  8.87 (s, 1H), 7.91 (dd,  $J = 7.8, 1.8$  Hz, 1H), 7.48 – 7.40 (m, 1H), 7.38 (s, 1H), 7.11 (d,  $J = 8.2$  Hz, 1H), 7.03 (td,  $J = 7.5, 1.3$  Hz, 1H), 3.93 (s, 3H).  $^{13}\text{C}$  NMR (101 MHz,  $\text{CDCl}_3$ )  $\delta$  158.29, 158.25, 151.47, 149.21, 134.43, 132.48, 131.25, 118.62, 118.44, 117.41, 113.16, 87.67, 31.47. HRMS-ESI calculated for  $\text{C}_{13}\text{H}_{10}\text{BrN}_3\text{O}$   $[\text{M}+\text{H}]^+$  304.0080, found 304.0076.

**5-bromo-7-methyl-4-(2-(prop-2-yn-1-yloxy)phenyl)-7H-pyrrolo[2,3-d]pyrimidine**

(6)



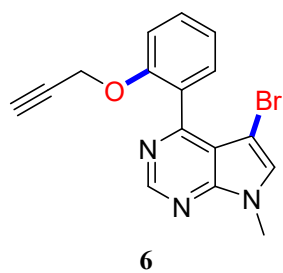

White solid (70 mg, 78% yield). Mp: 103–105 °C. <sup>1</sup>H NMR (400 MHz, CDCl<sub>3</sub>) δ 8.99 (s, 1H), 7.51-7.49 (m, 1H), 7.44 (dd, *J* = 7.5, 1.7 Hz, 1H), 7.22 (s, 1H), 7.20-7.13 (m, 2H), 4.65 (d, *J* = 2.4 Hz, 2H), 3.91 (s, 3H), 2.45 (t, *J* = 2.4 Hz, 1H). <sup>13</sup>C NMR (101 MHz, CDCl<sub>3</sub>) δ 157.39, 155.63, 151.76, 150.14, 131.01, 130.59, 129.18, 126.60, 121.26, 116.14, 112.34, 88.55, 78.53, 75.58, 56.33, 31.21. HRMS-ESI calculated for C<sub>16</sub>H<sub>13</sub>BrN<sub>3</sub>O [M+Na]<sup>+</sup> 364.0056, found 364.0064.

### 3-acetoxy-2-(7-methyl-7H-pyrrolo[2,3-d]pyrimidin-4-yl)phenyl propionate (9)

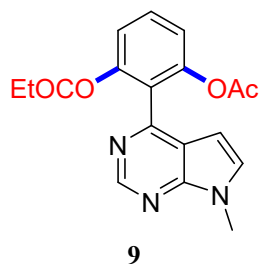

Yellow oil (79 mg, 65% yield). <sup>1</sup>H NMR (400 MHz, CDCl<sub>3</sub>) δ 8.94 (s, 1H), 7.50 (t, *J* = 8.2 Hz, 1H), 7.20-7.17 (m, 2H), 7.16-7.12 (m, 1H), 6.34 (d, *J* = 3.6 Hz, 1H), 3.89 (s, 3H), 2.15 (qd, *J* = 7.6, 4.0 Hz, 2H), 1.89 (s, 3H), 0.87 (t, *J* = 7.5 Hz, 3H). <sup>13</sup>C NMR (101 MHz, CDCl<sub>3</sub>) δ 172.20, 168.82, 152.00, 150.97, 150.87, 149.18, 149.10, 130.38, 130.08, 124.16, 120.73, 120.59, 118.51, 99.98, 31.22, 27.39, 20.69, 8.65. HRMS-ESI calculated for C<sub>18</sub>H<sub>18</sub>N<sub>3</sub>O<sub>4</sub> [M+H]<sup>+</sup> 340.1292, found 340.1295.

## 5. NMR Spectra of Compounds

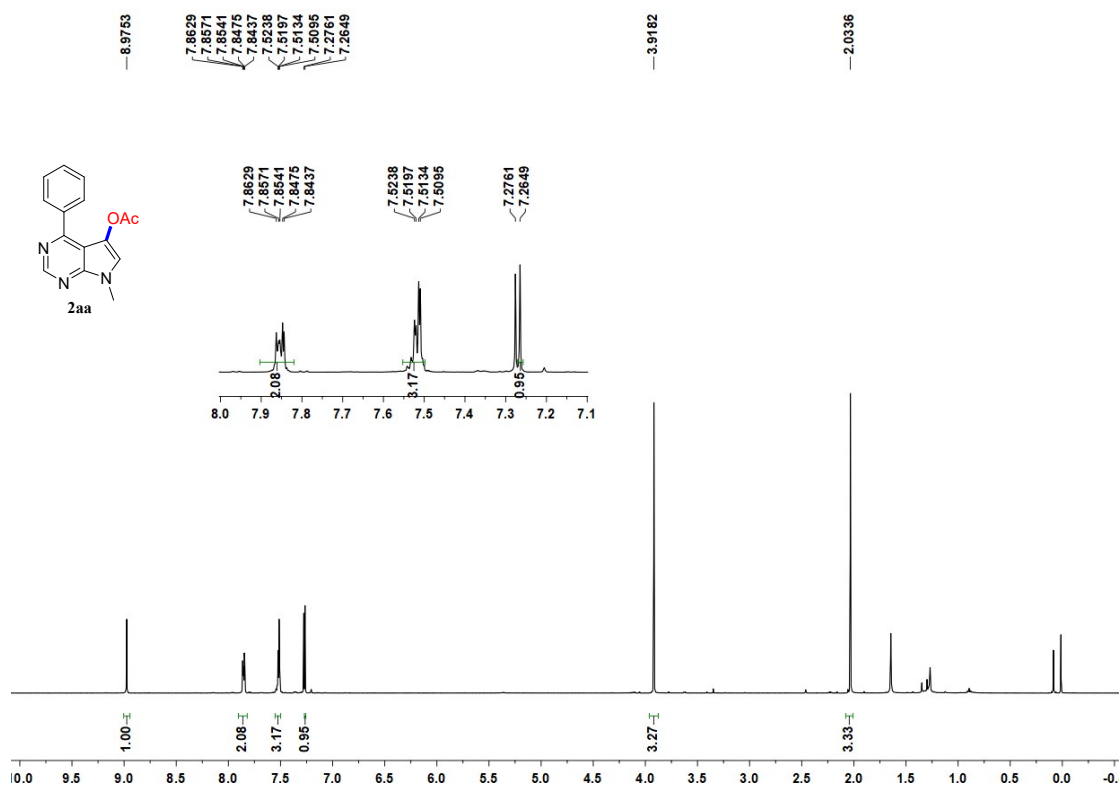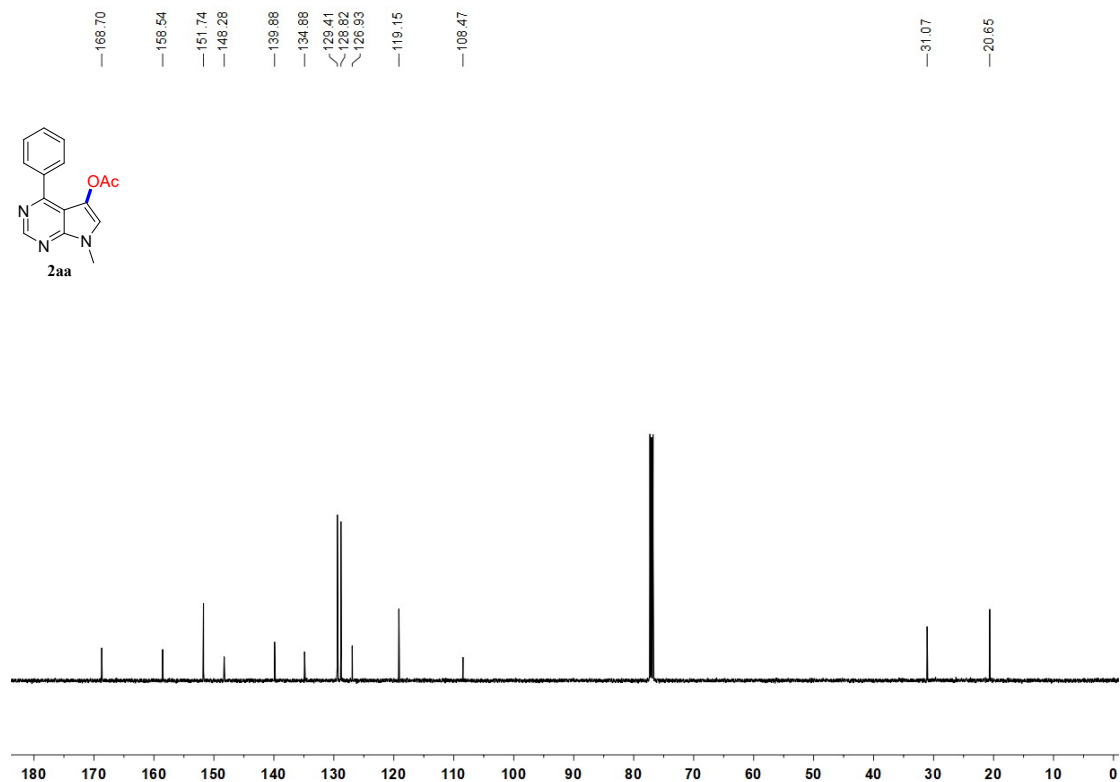

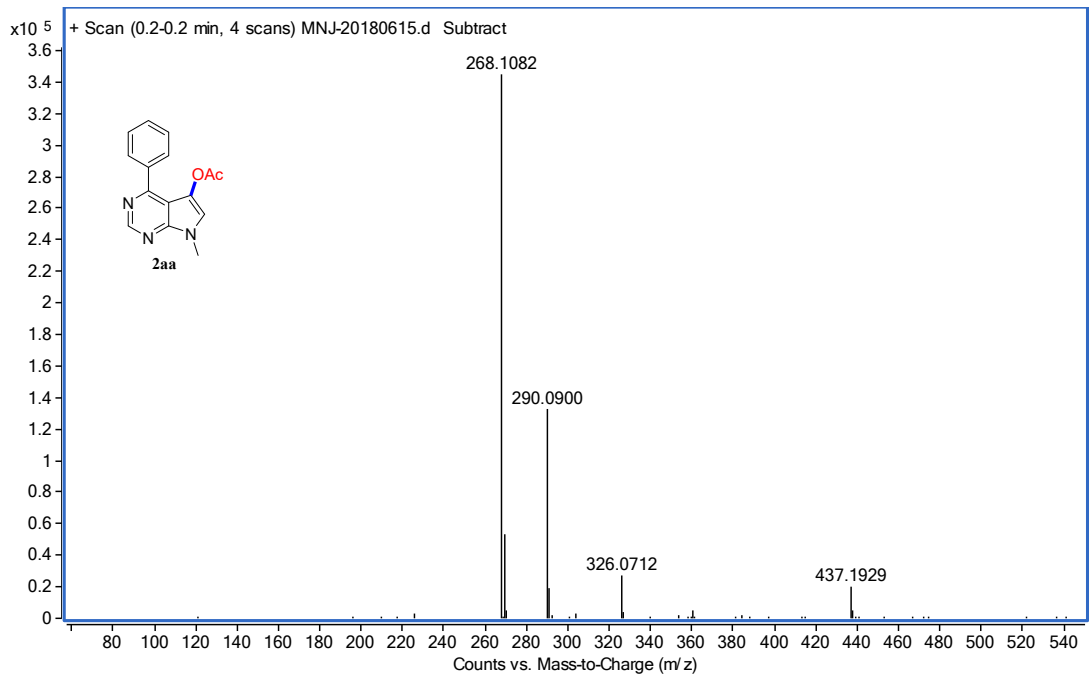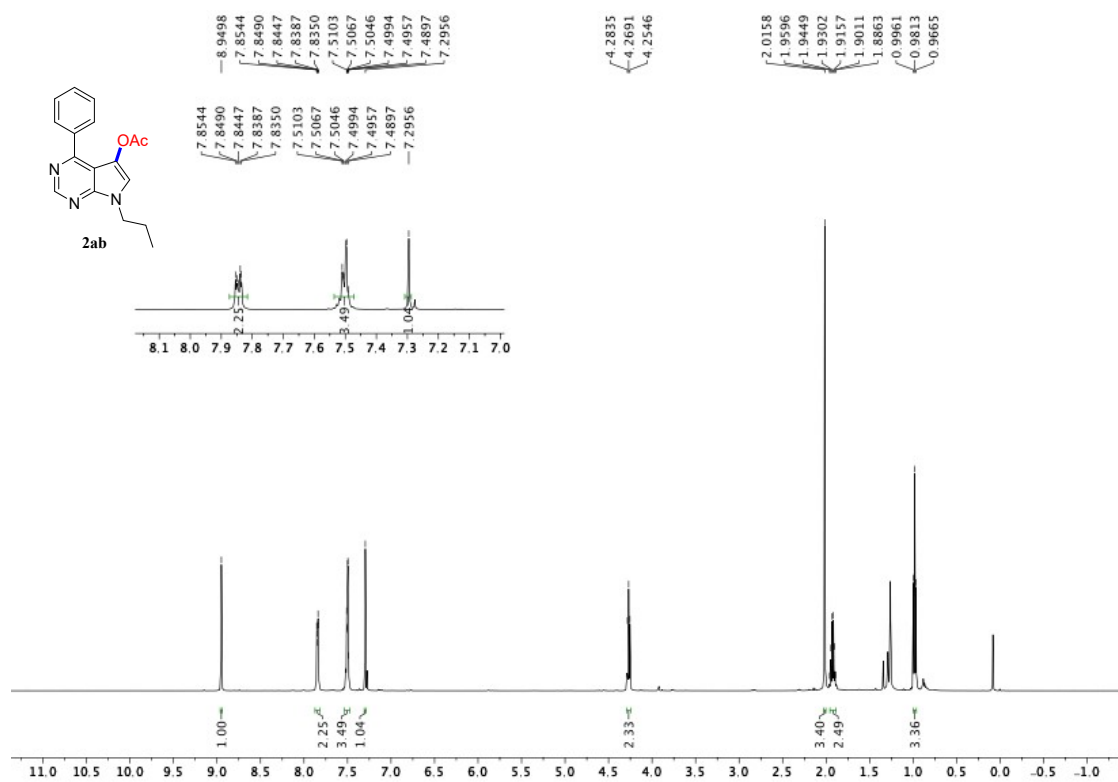

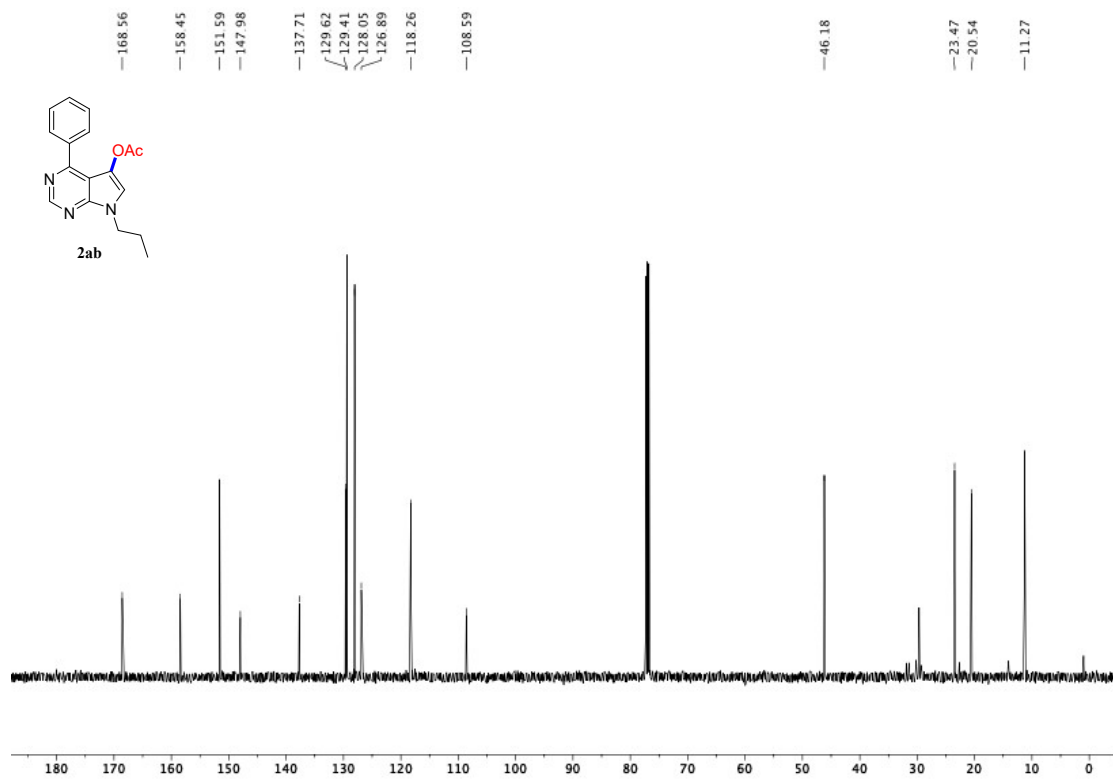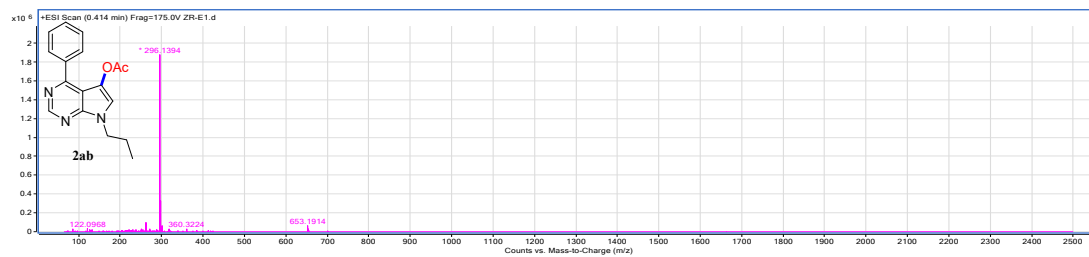

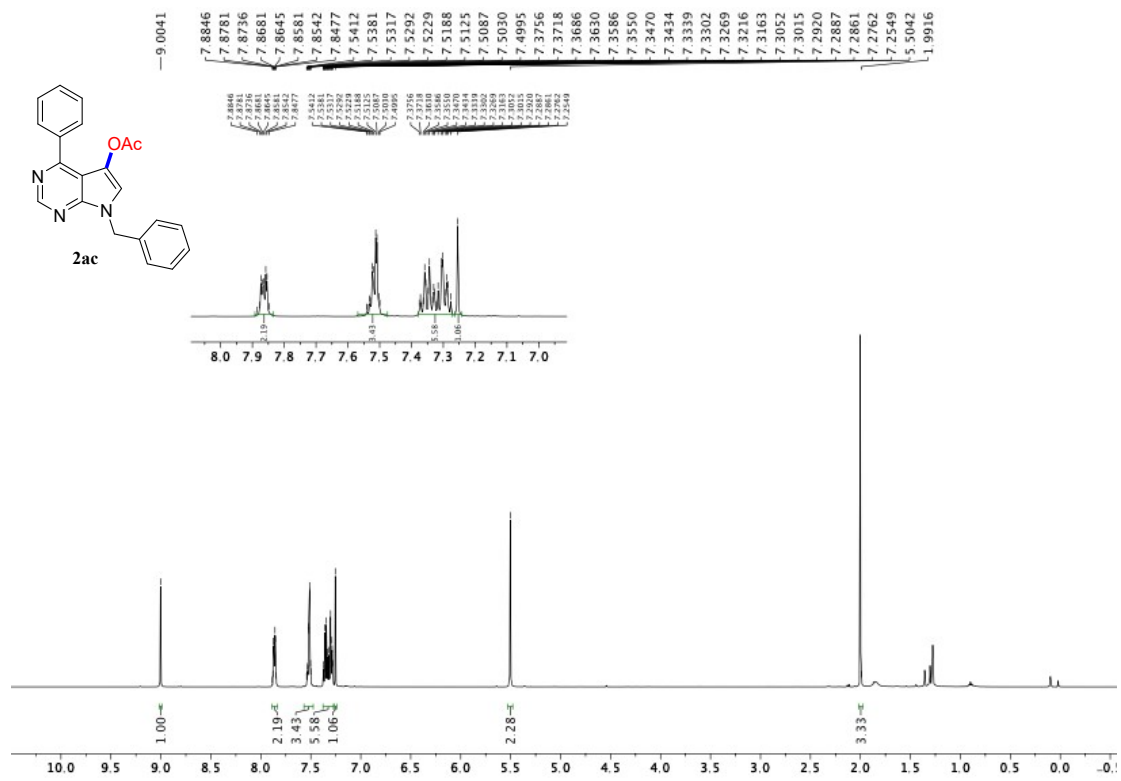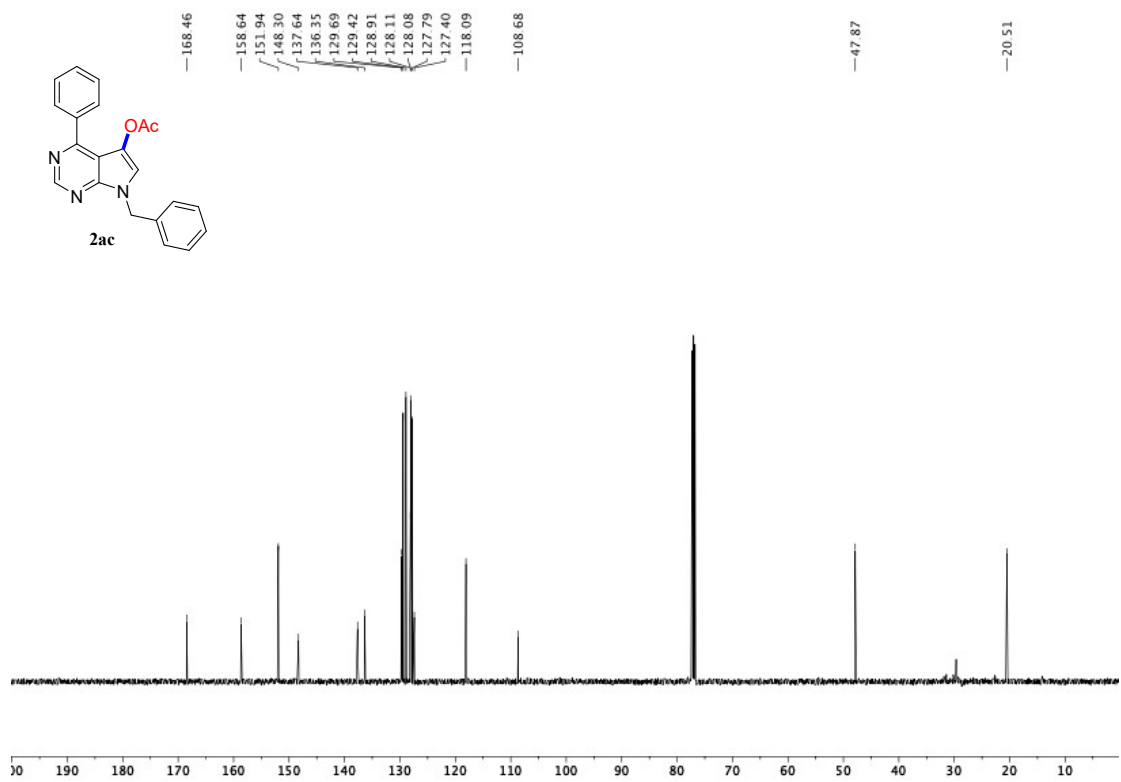

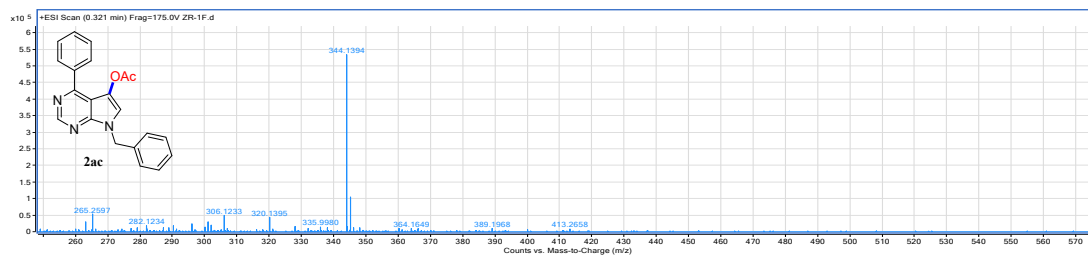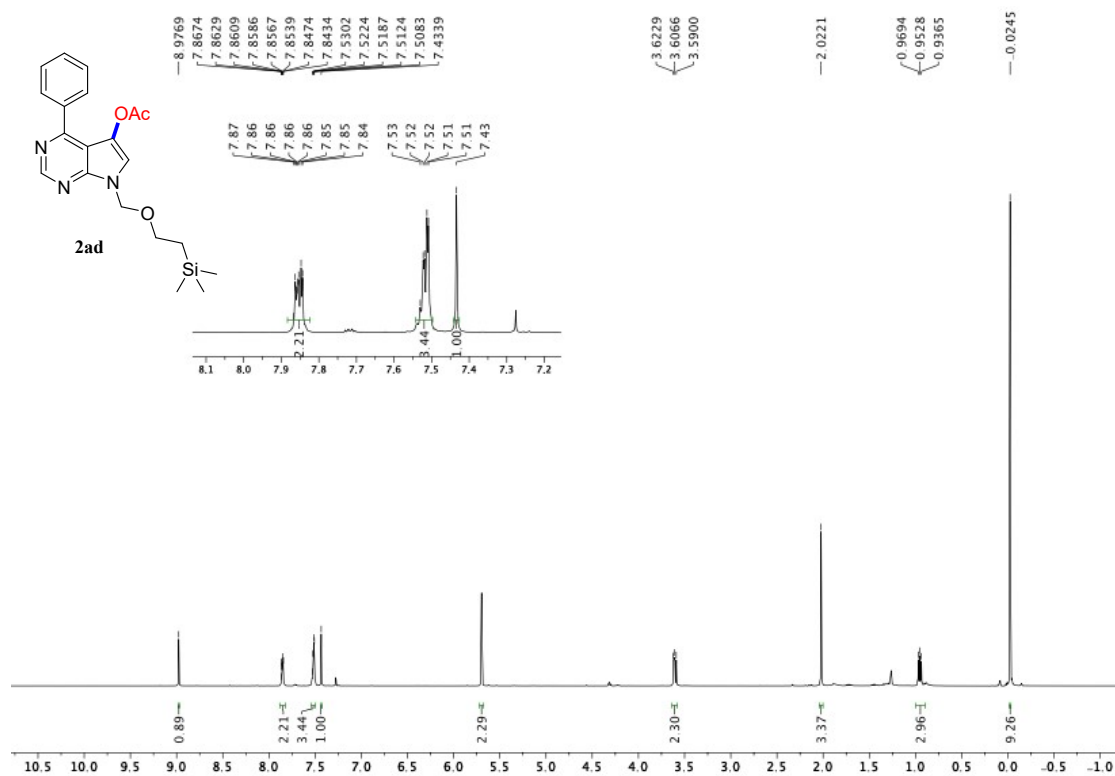

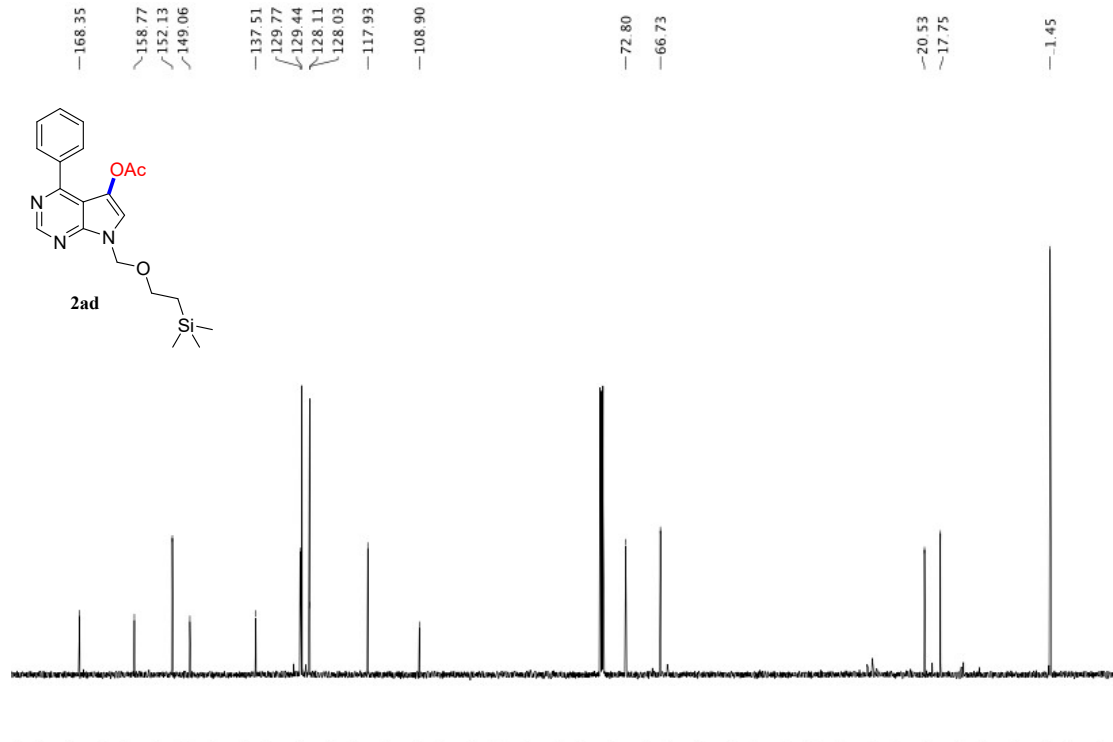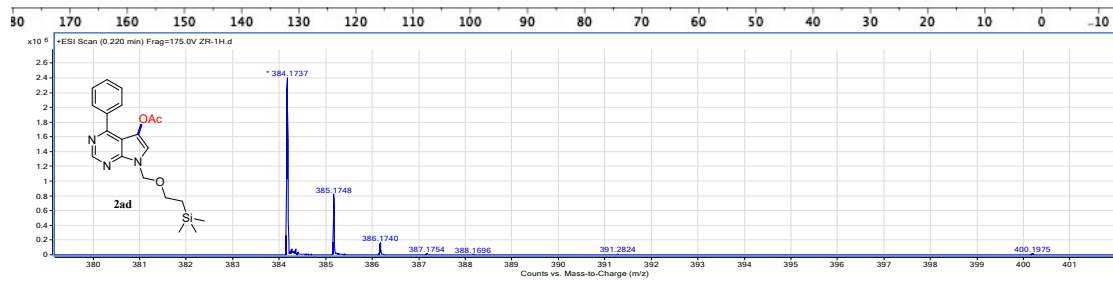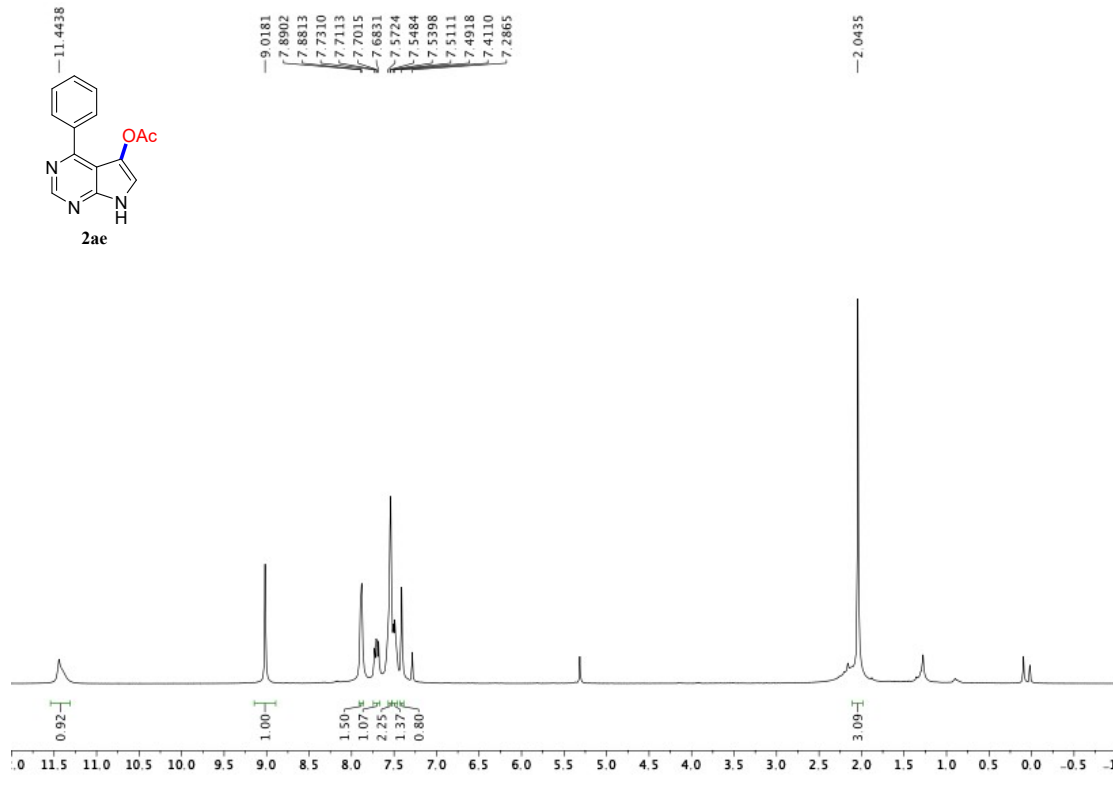

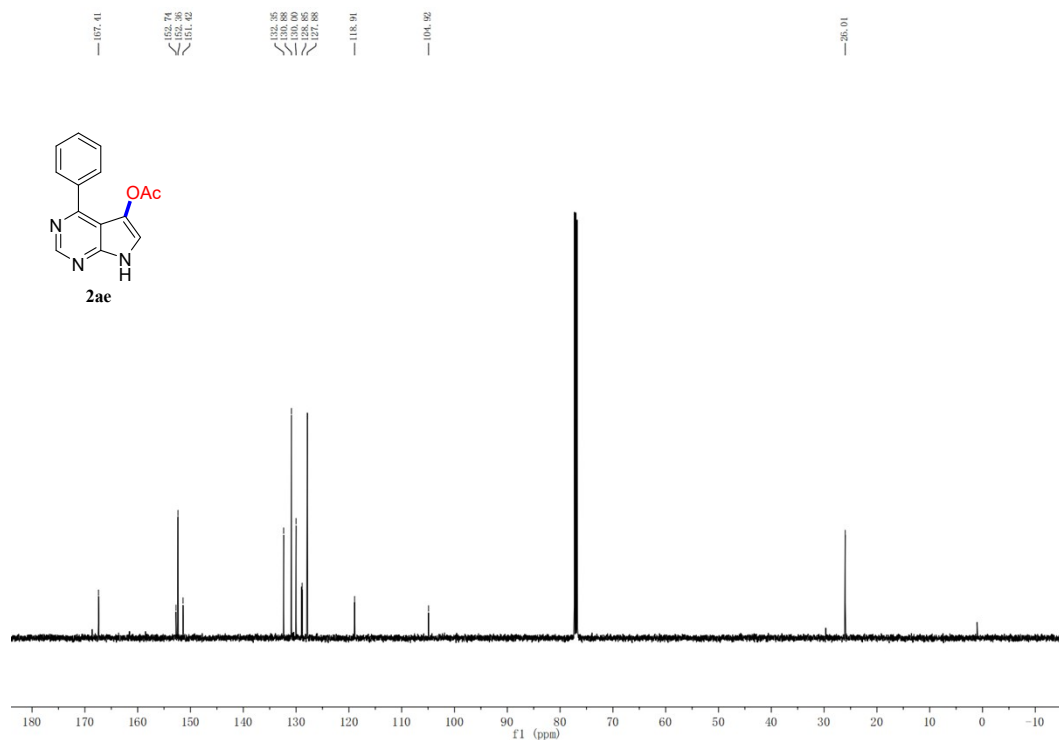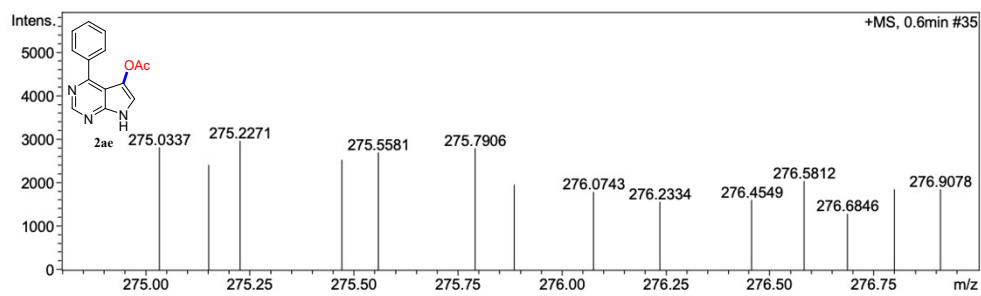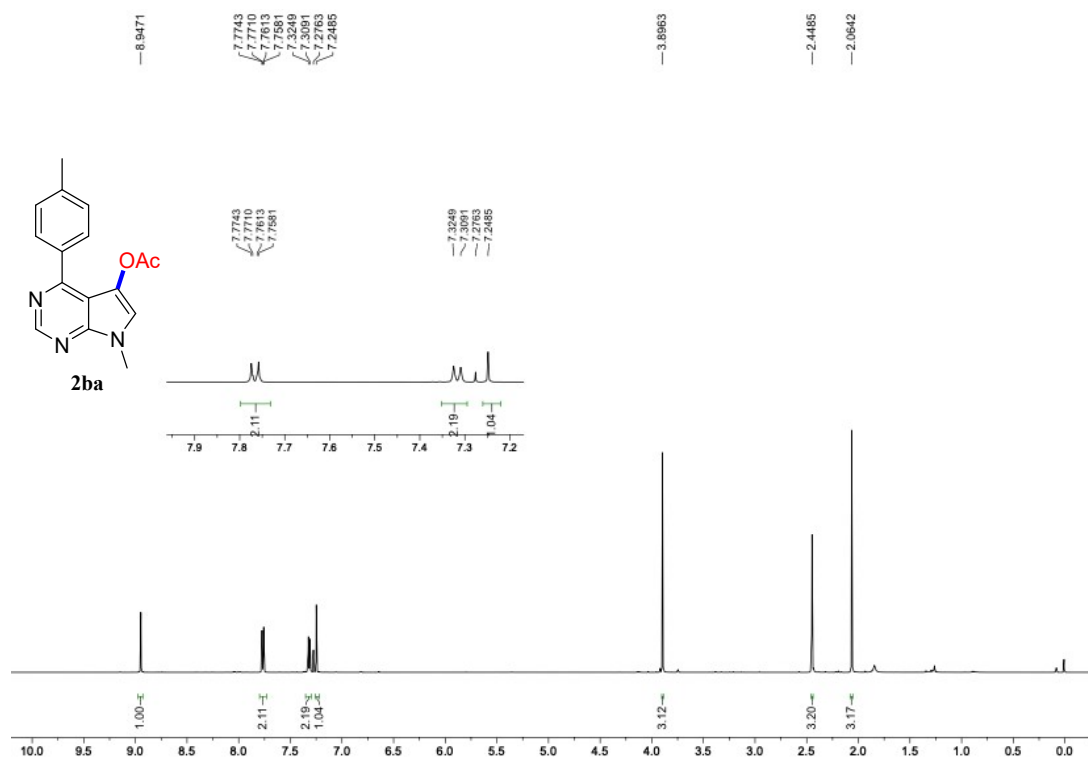



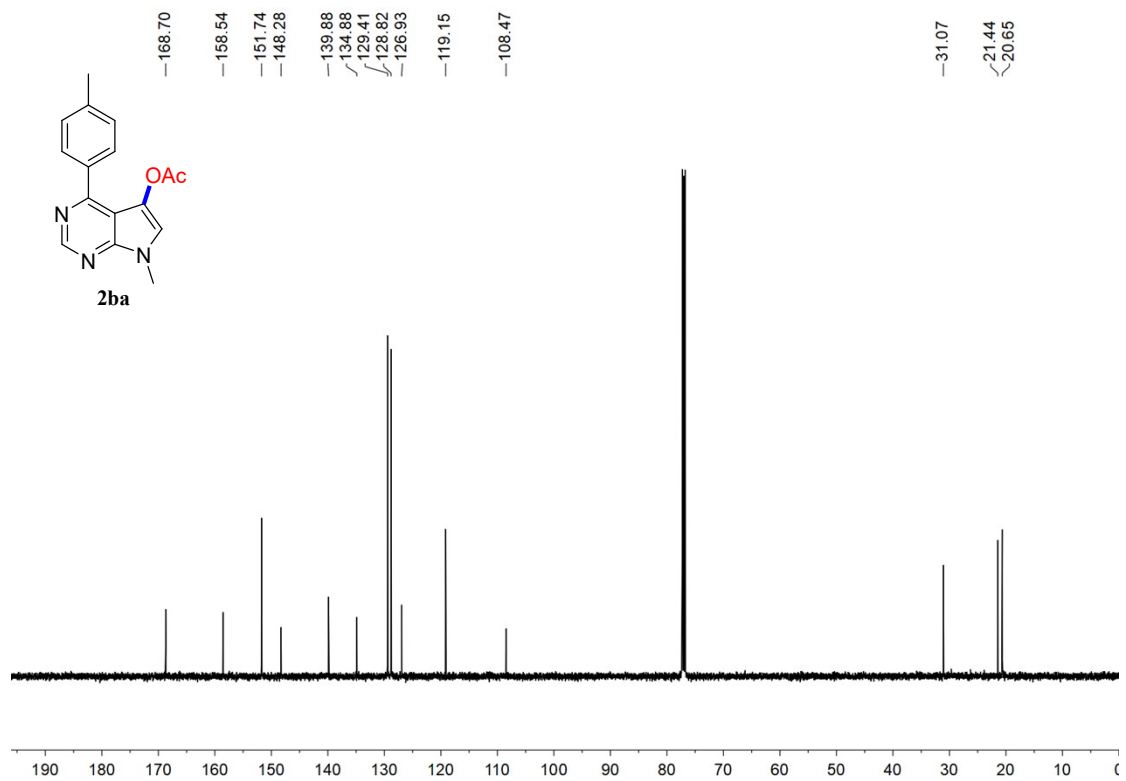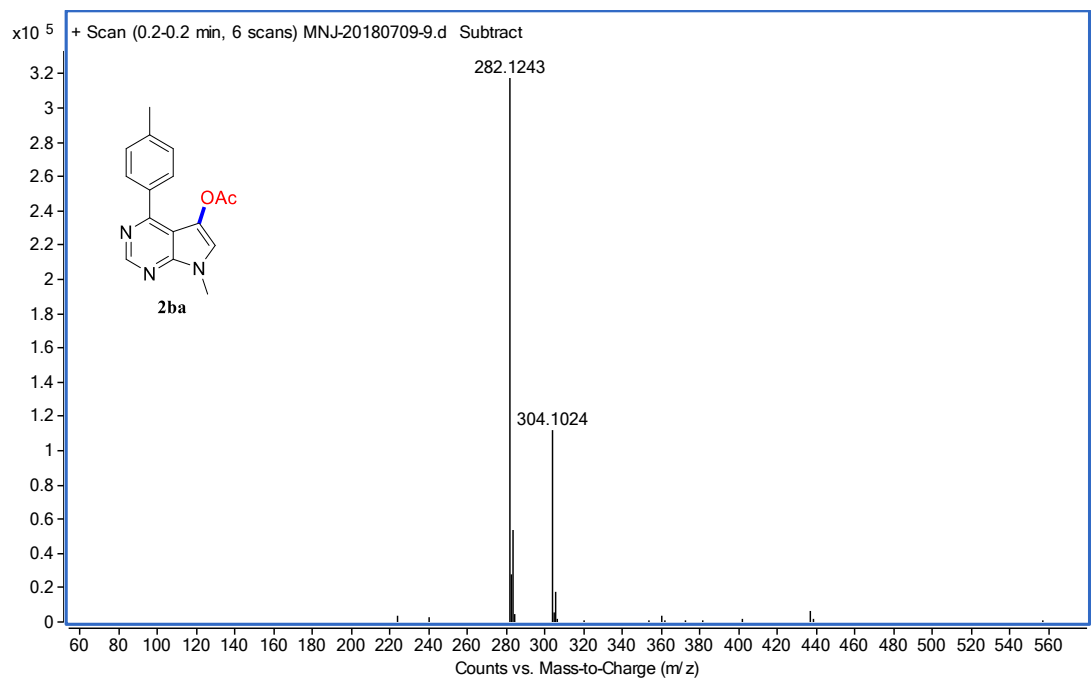

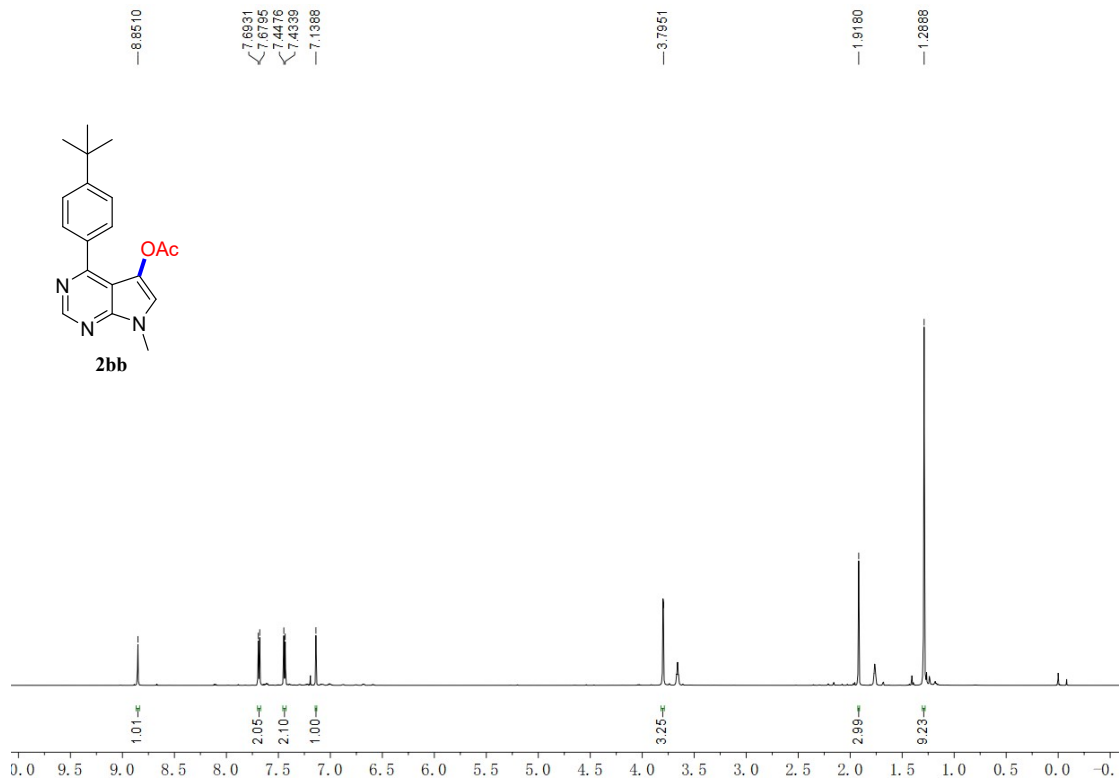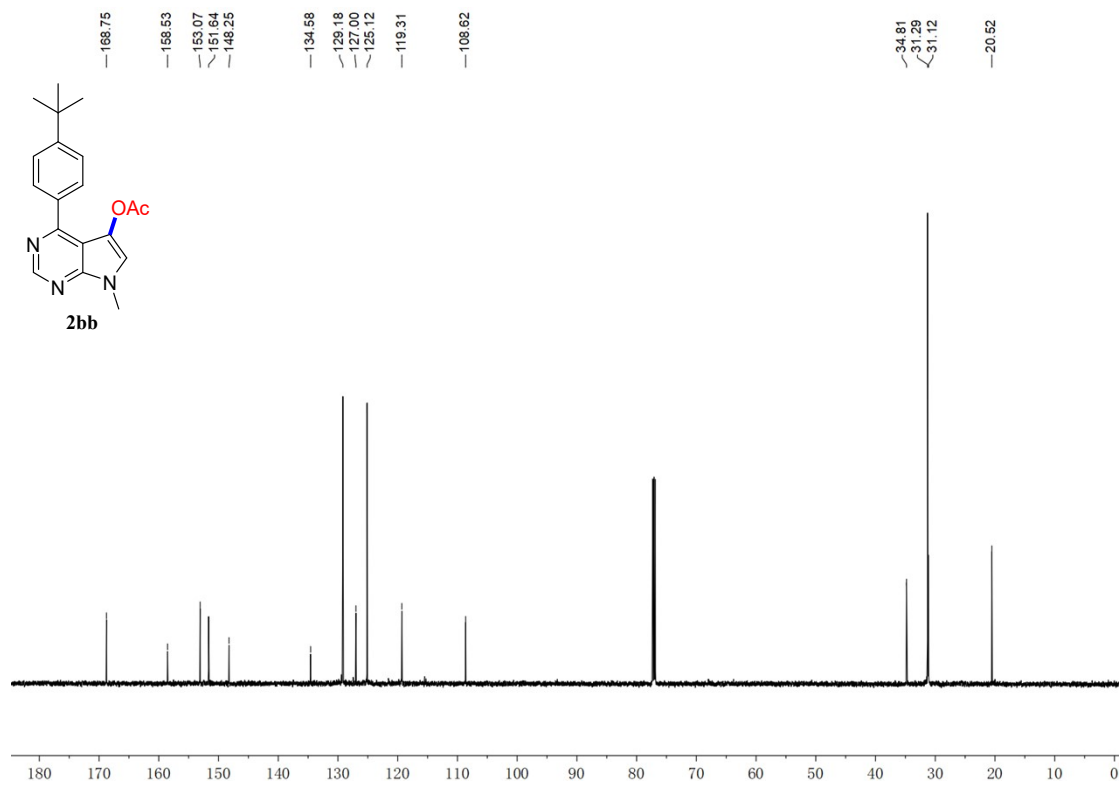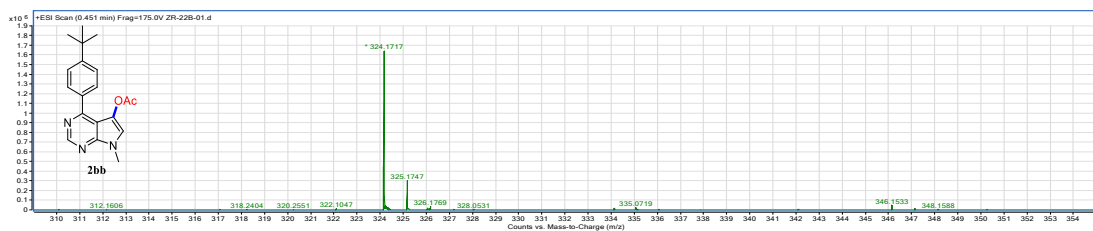

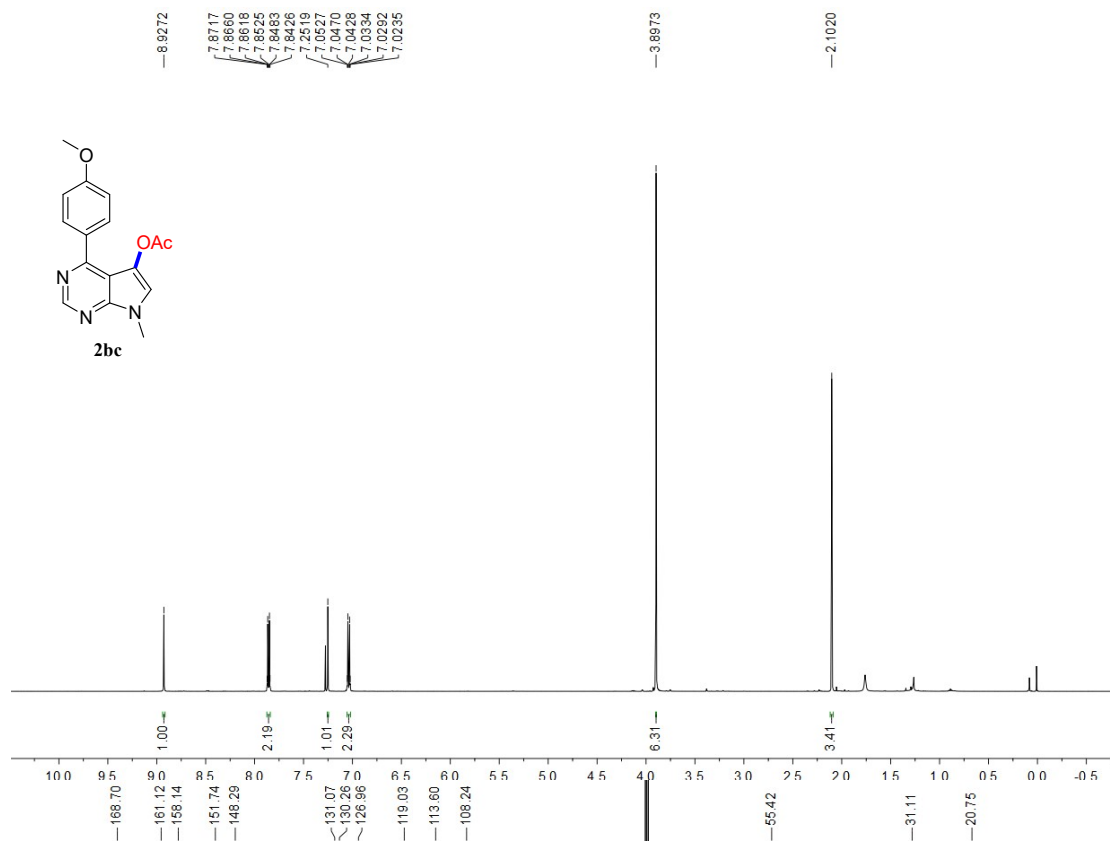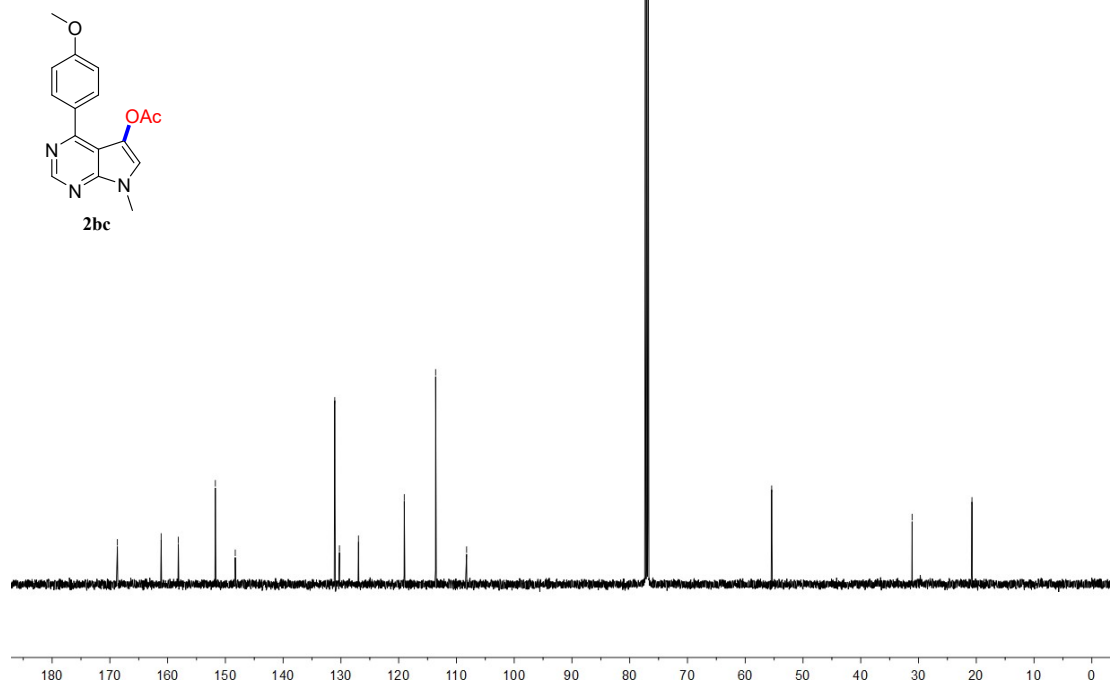

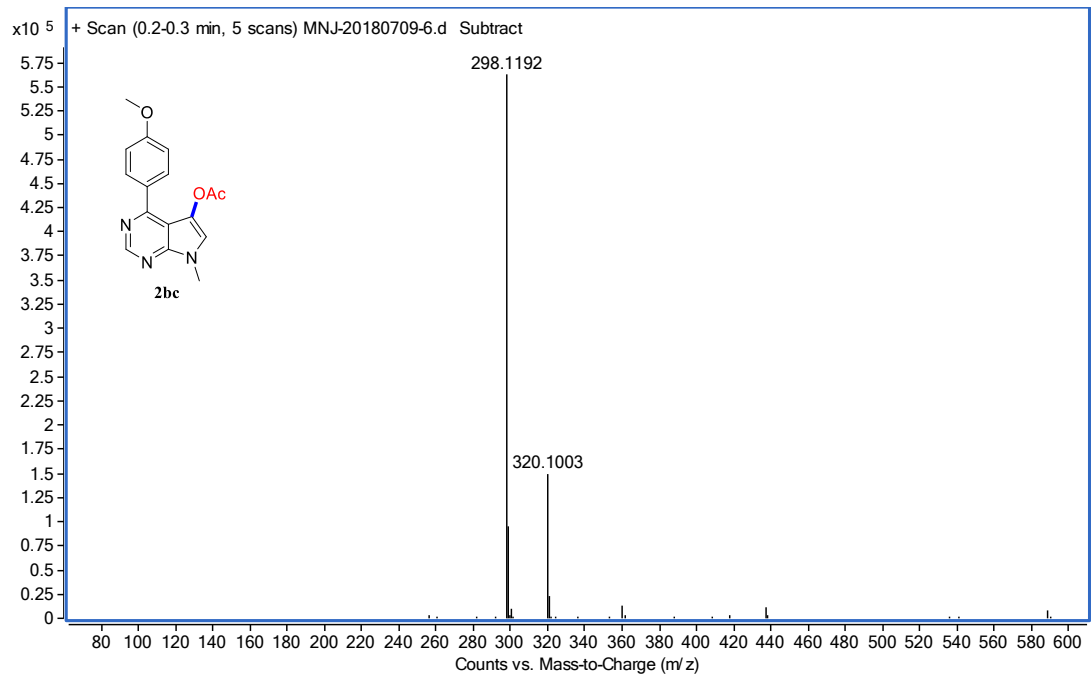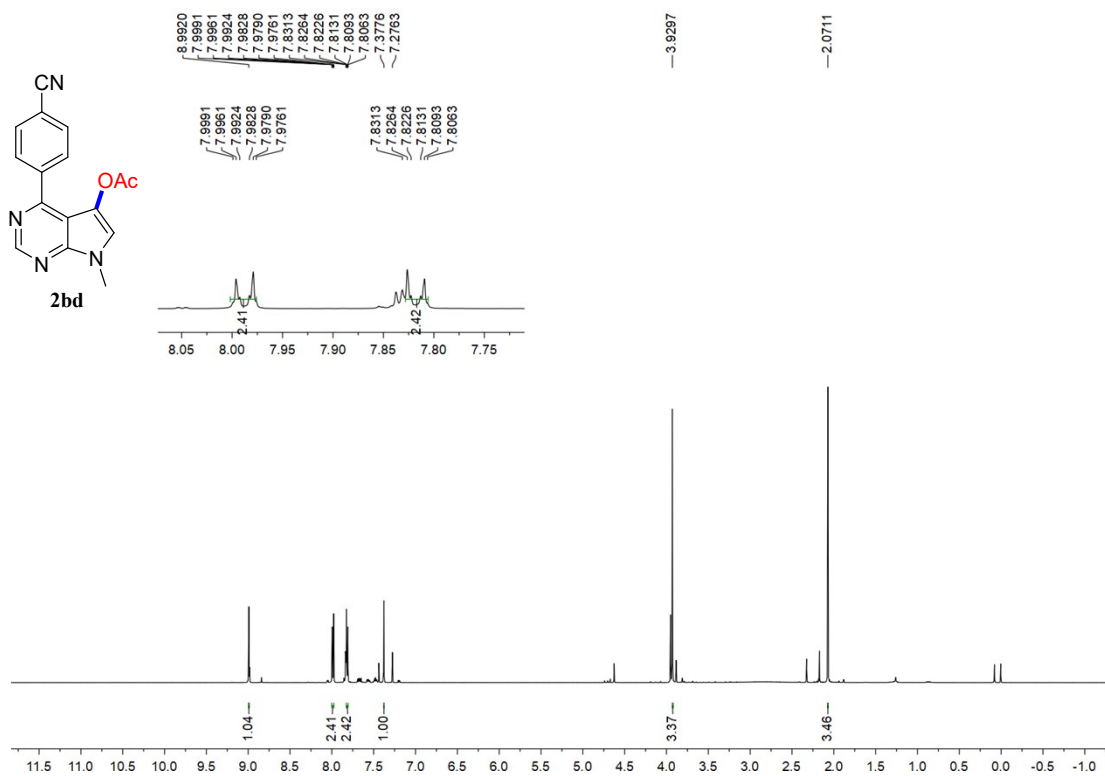

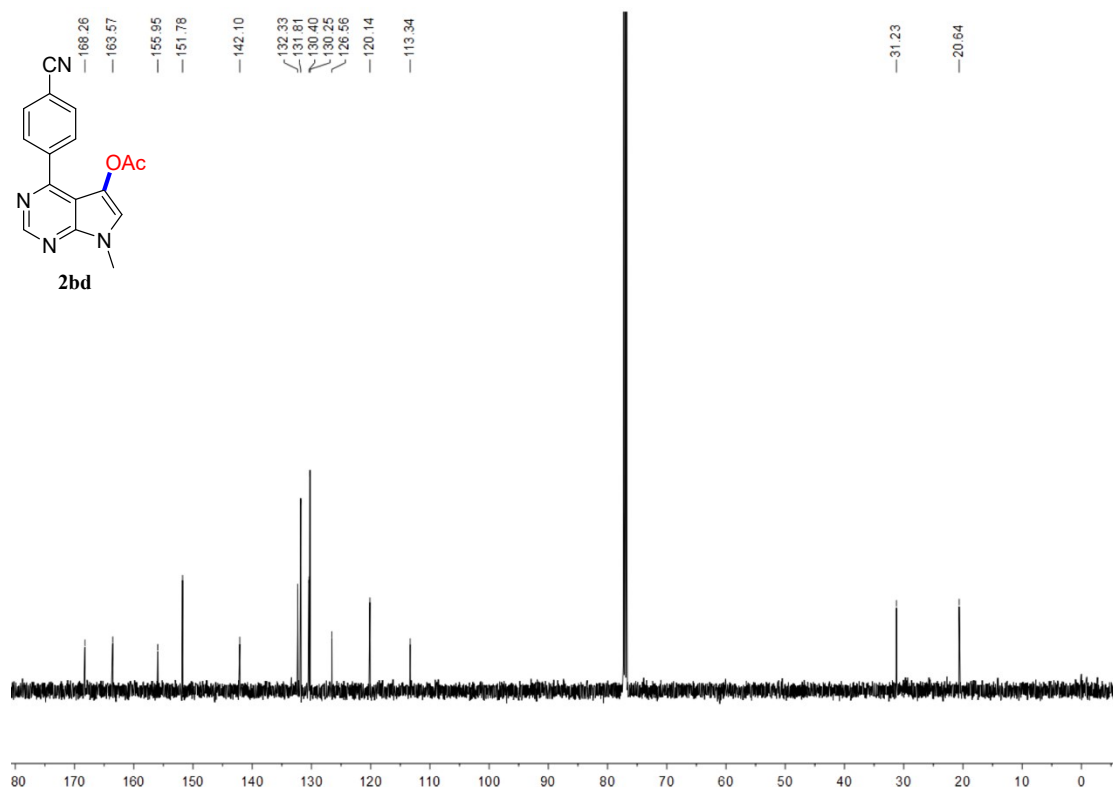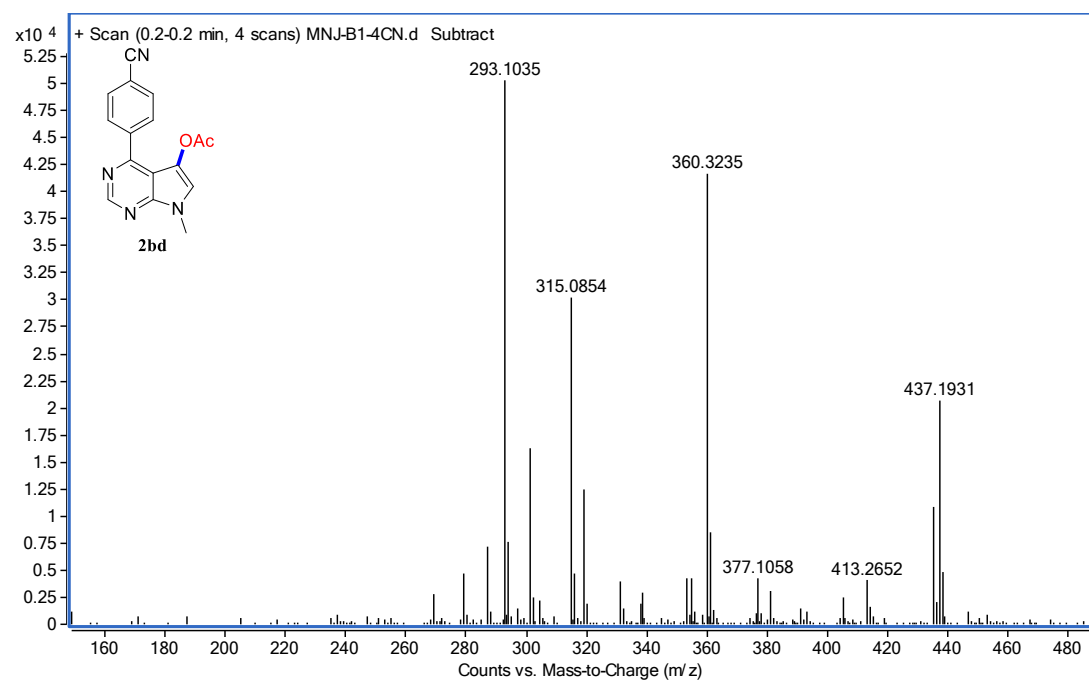

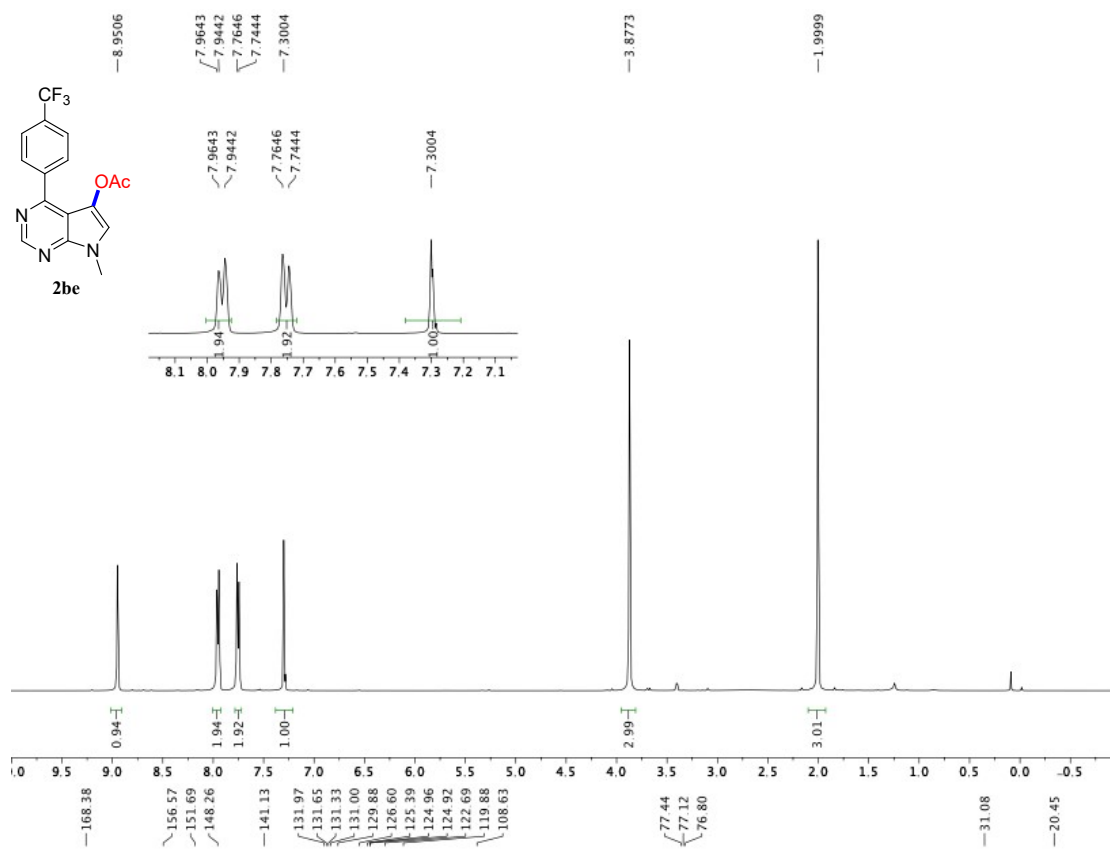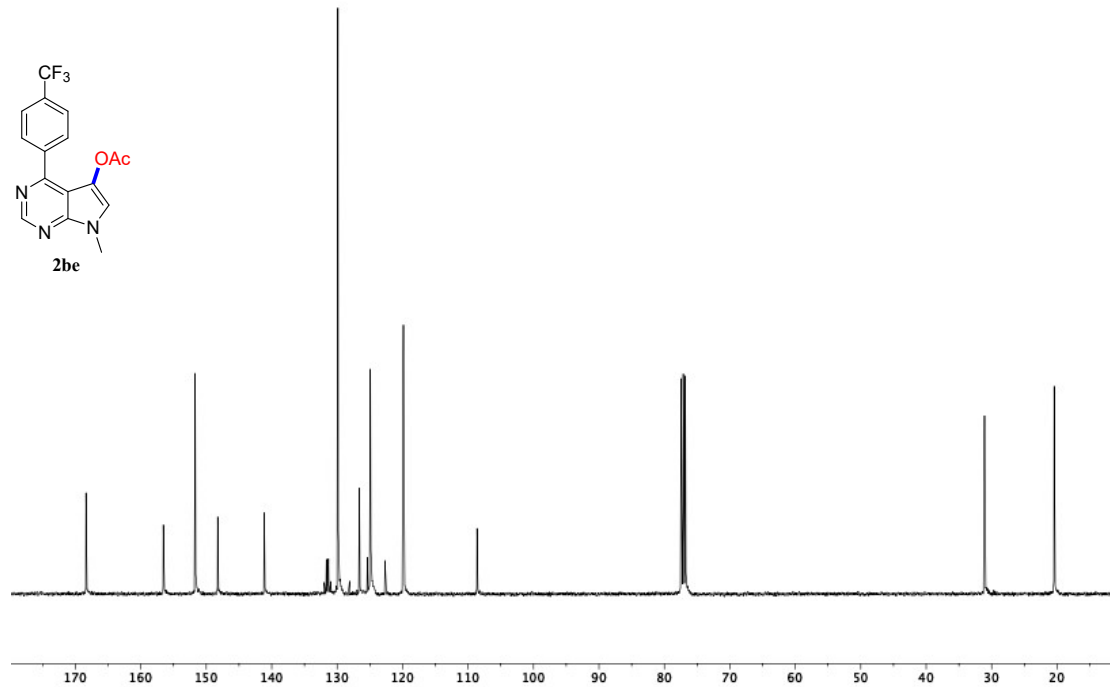

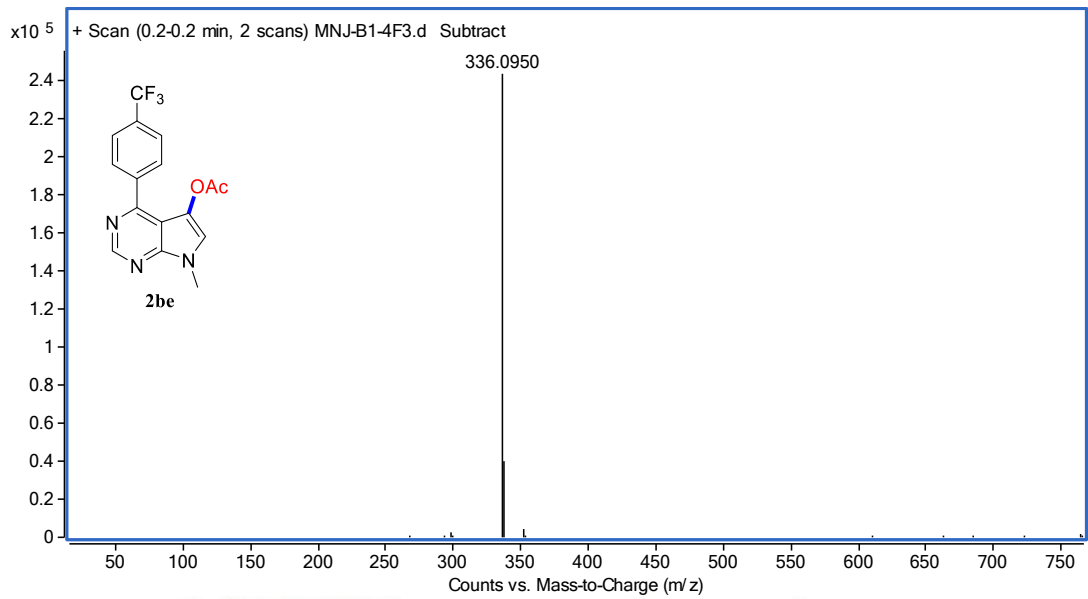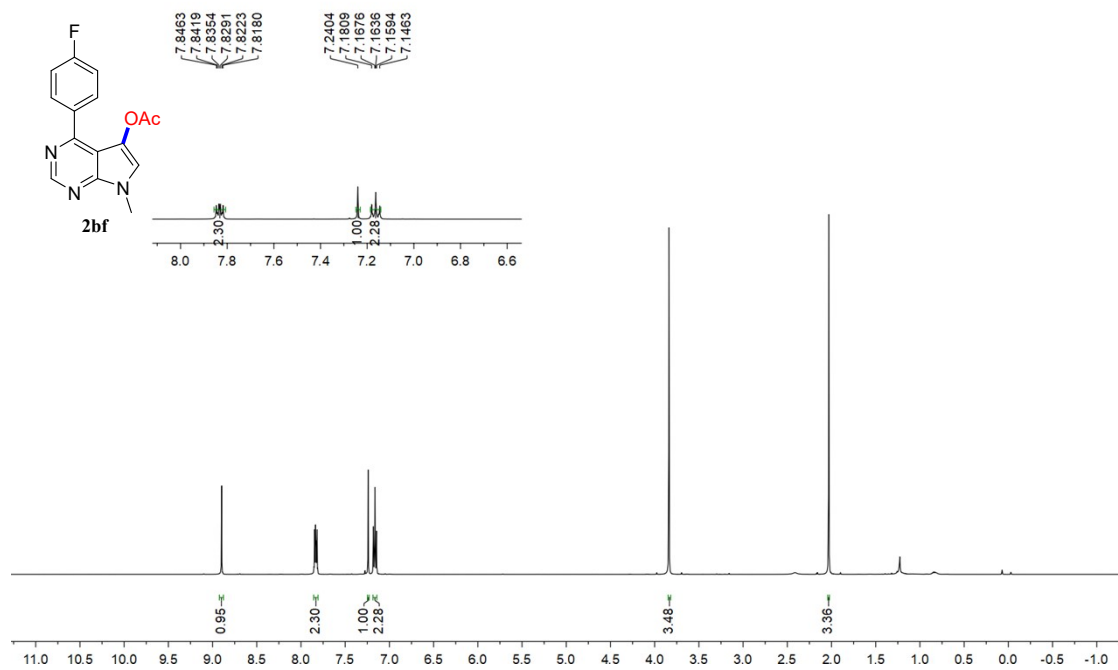

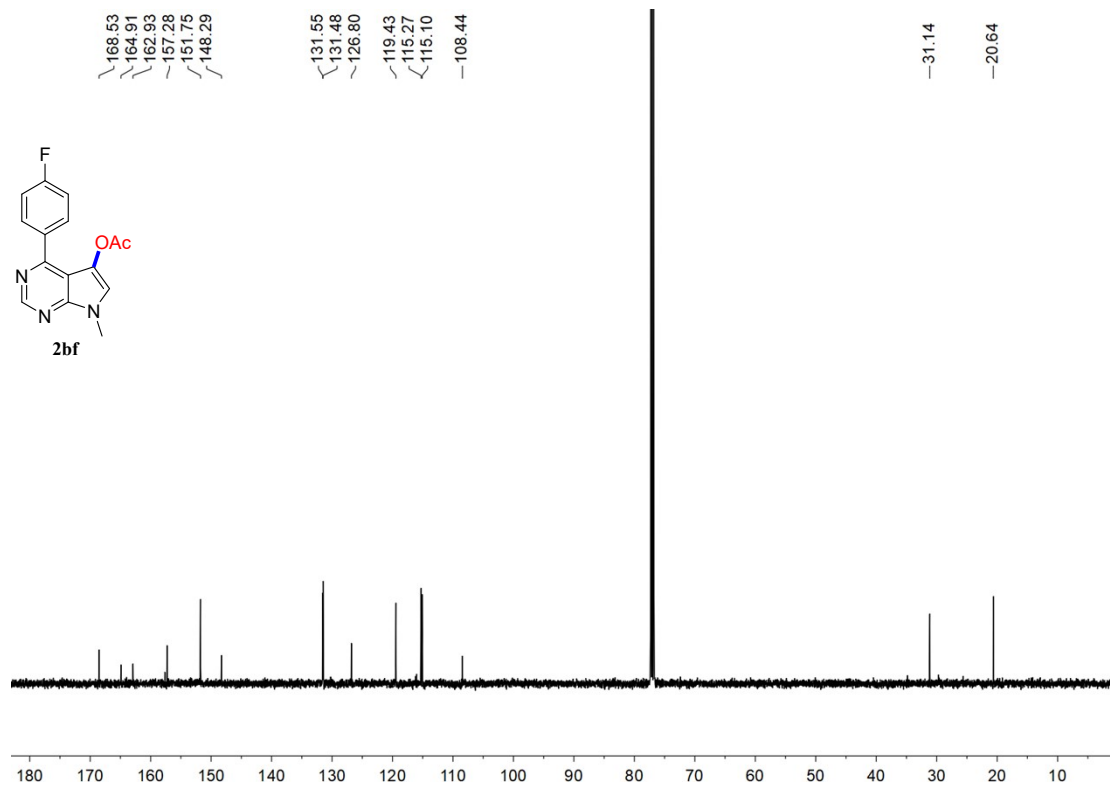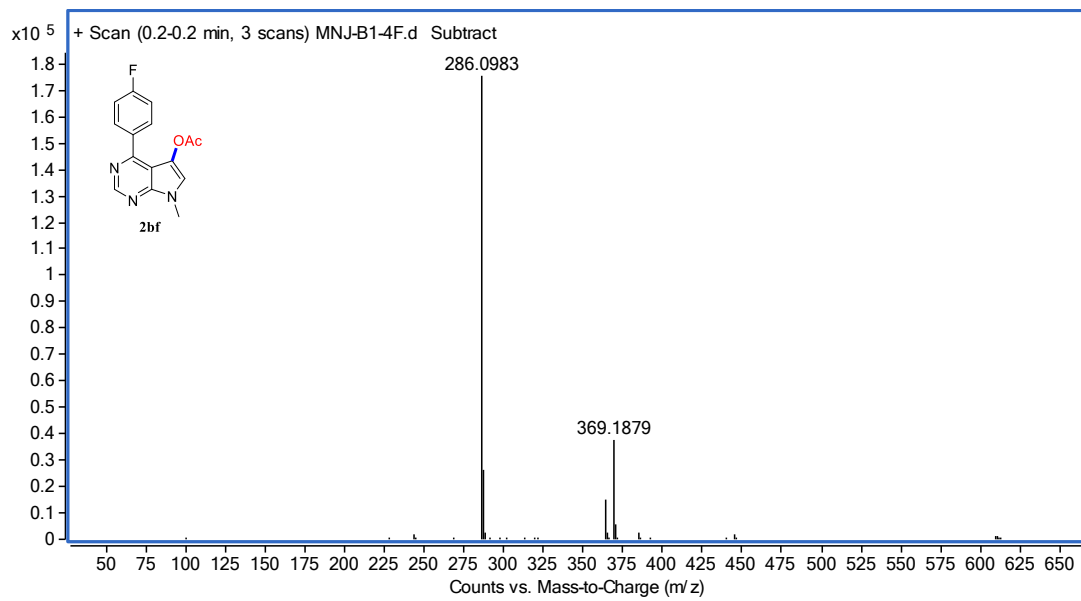



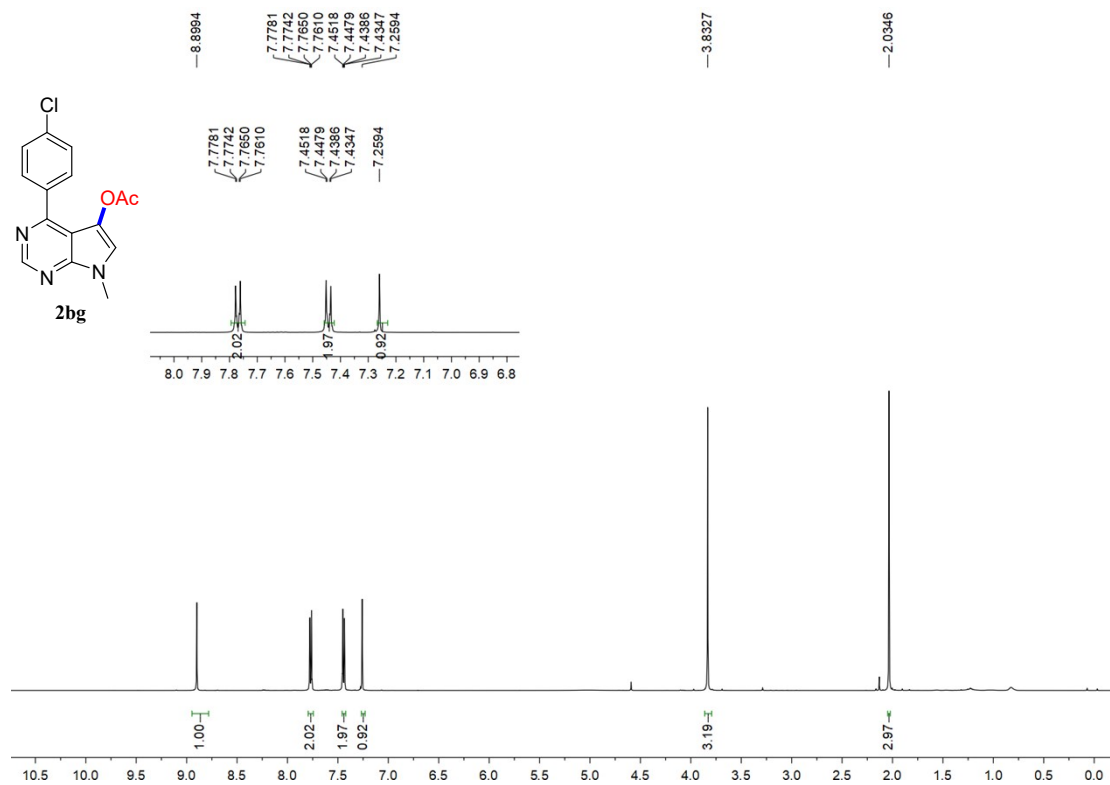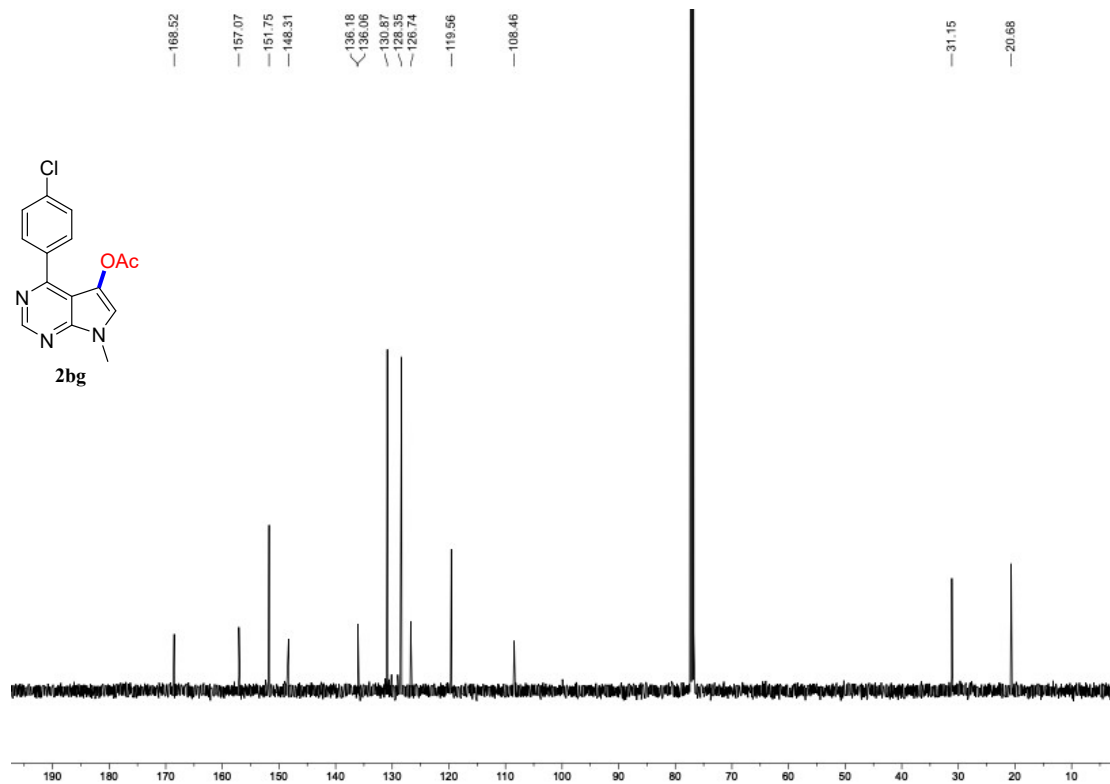

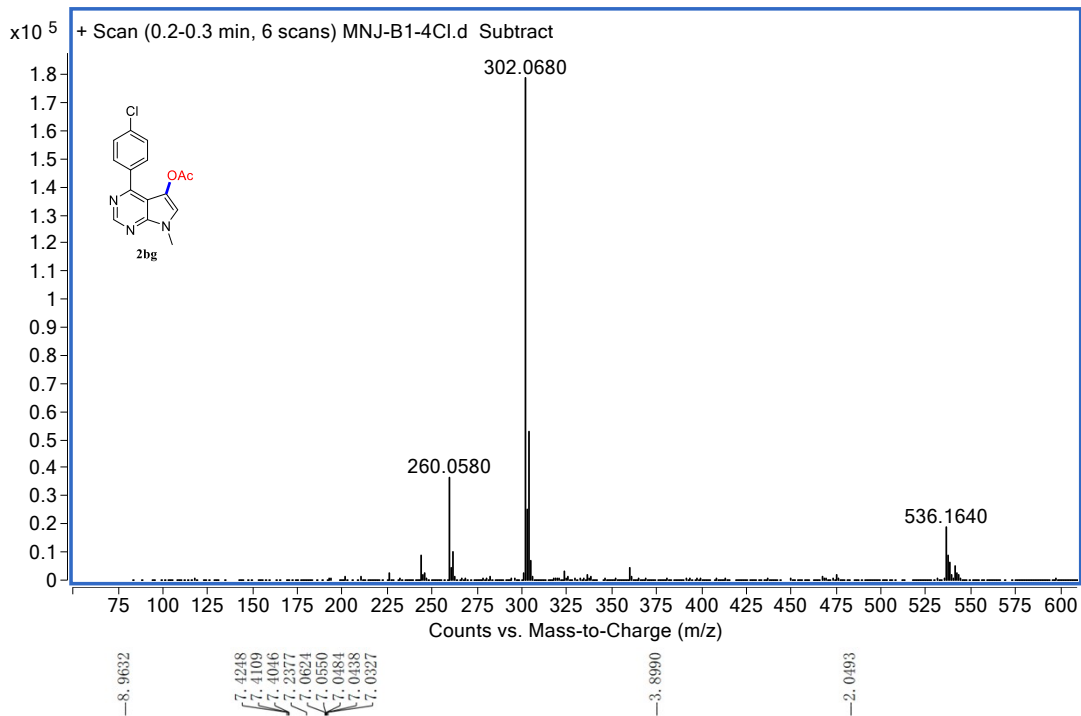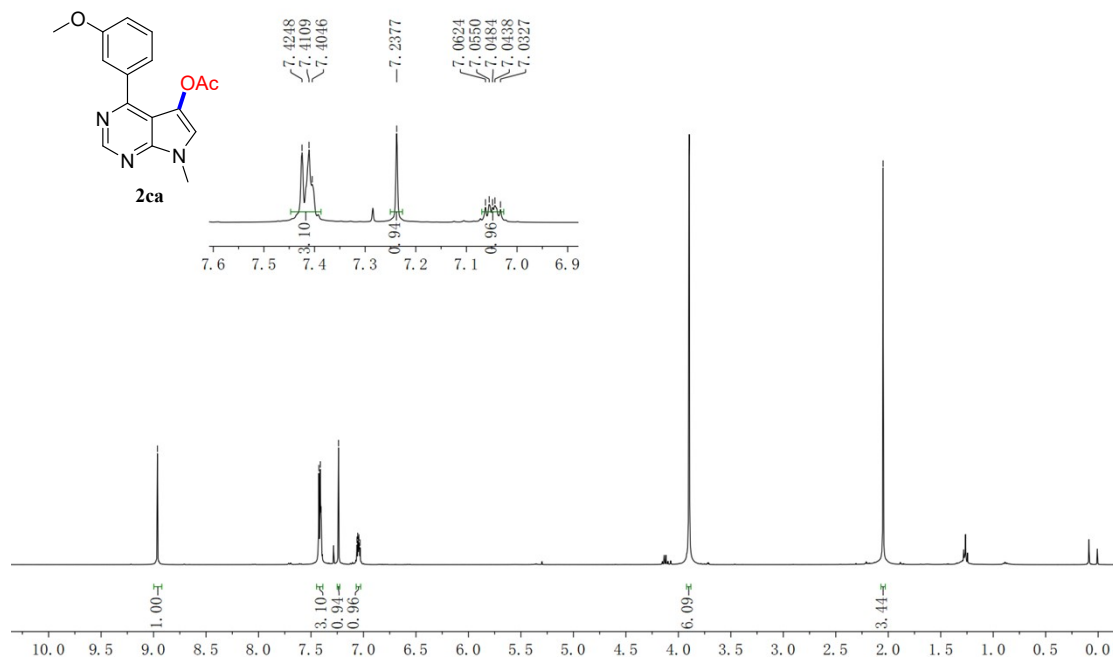

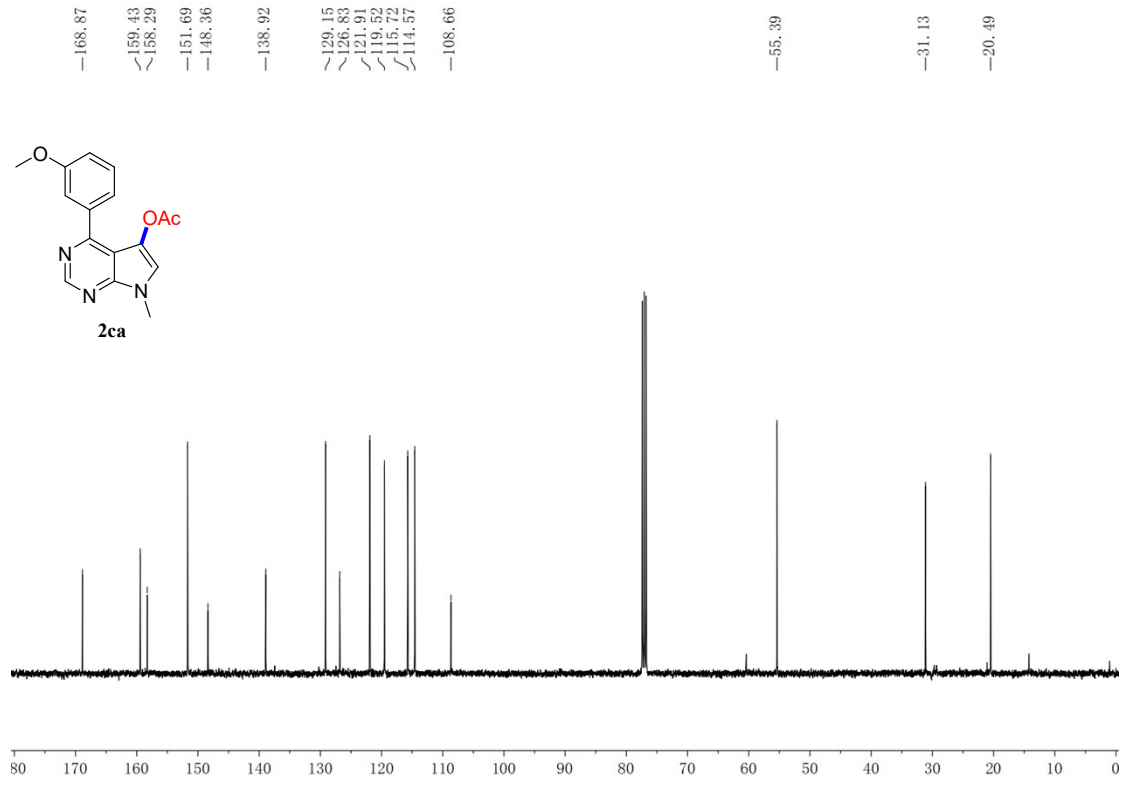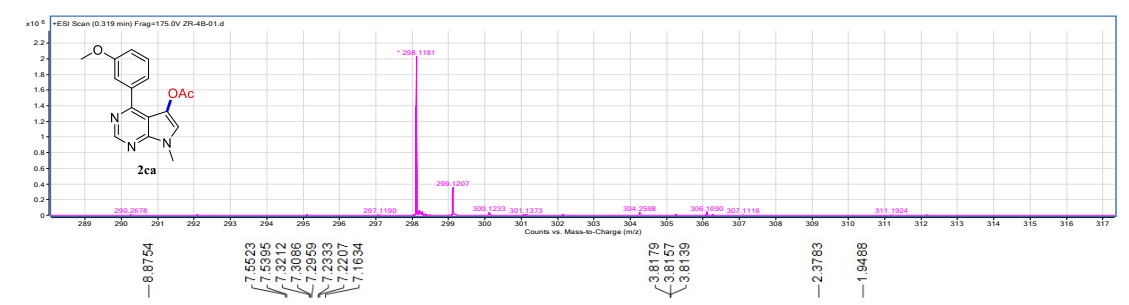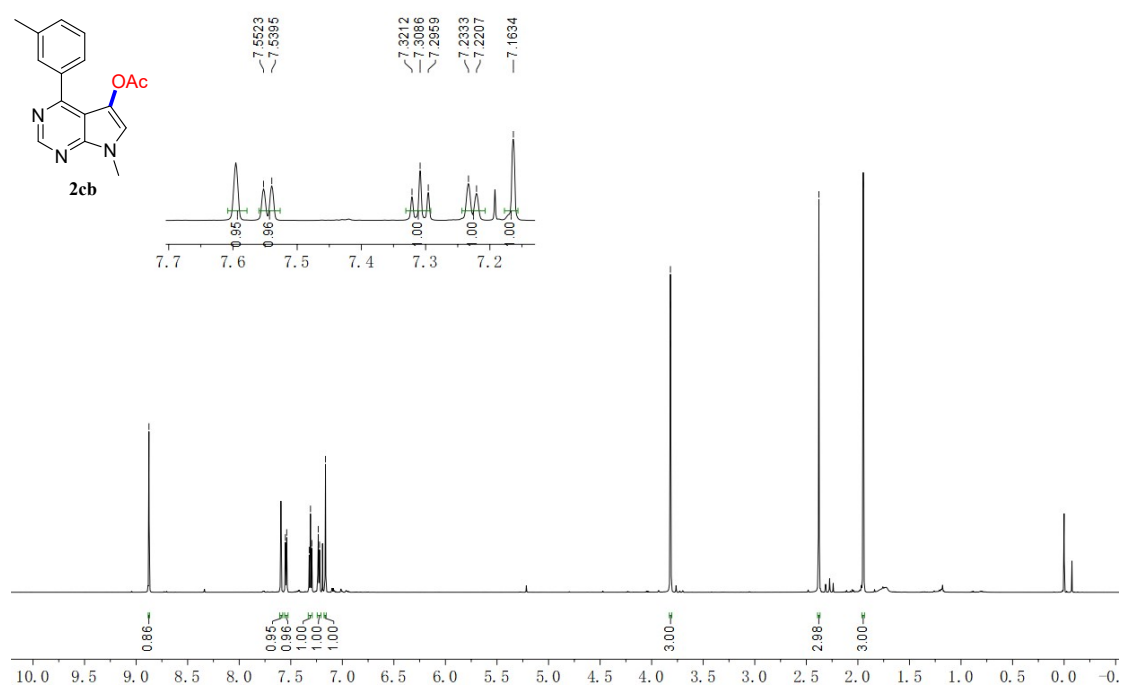

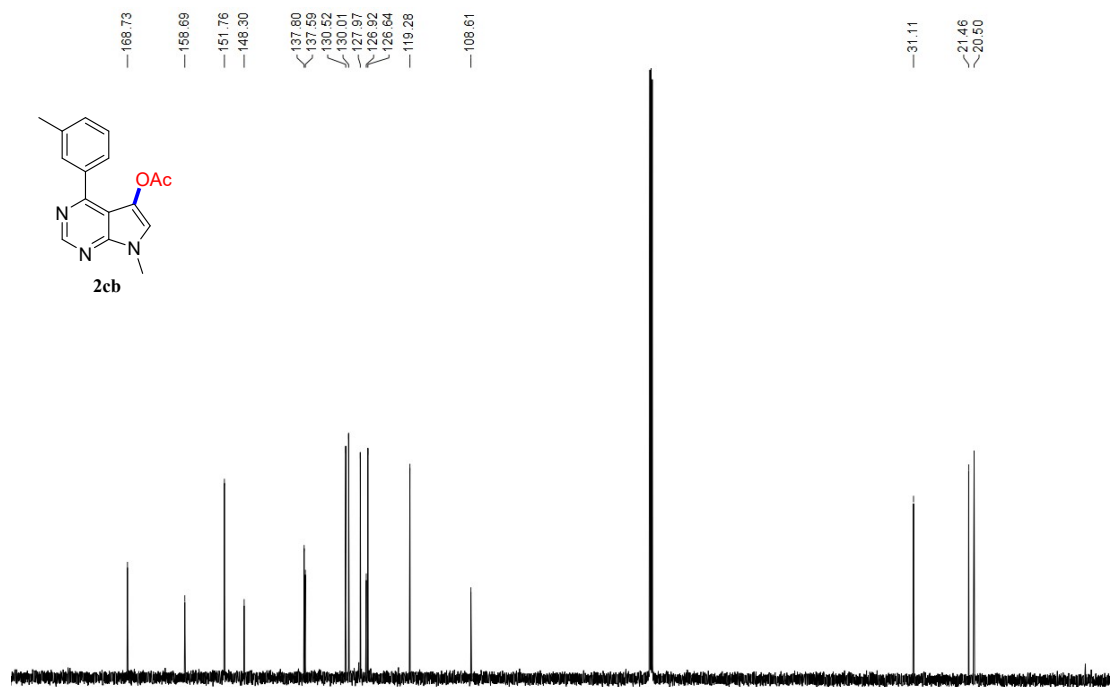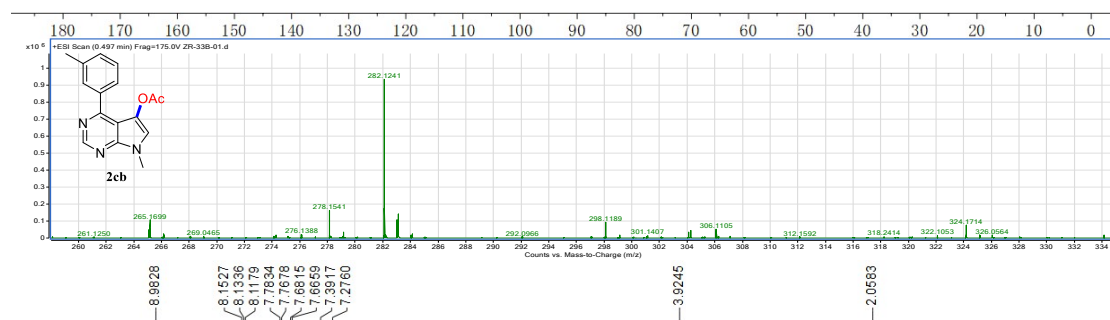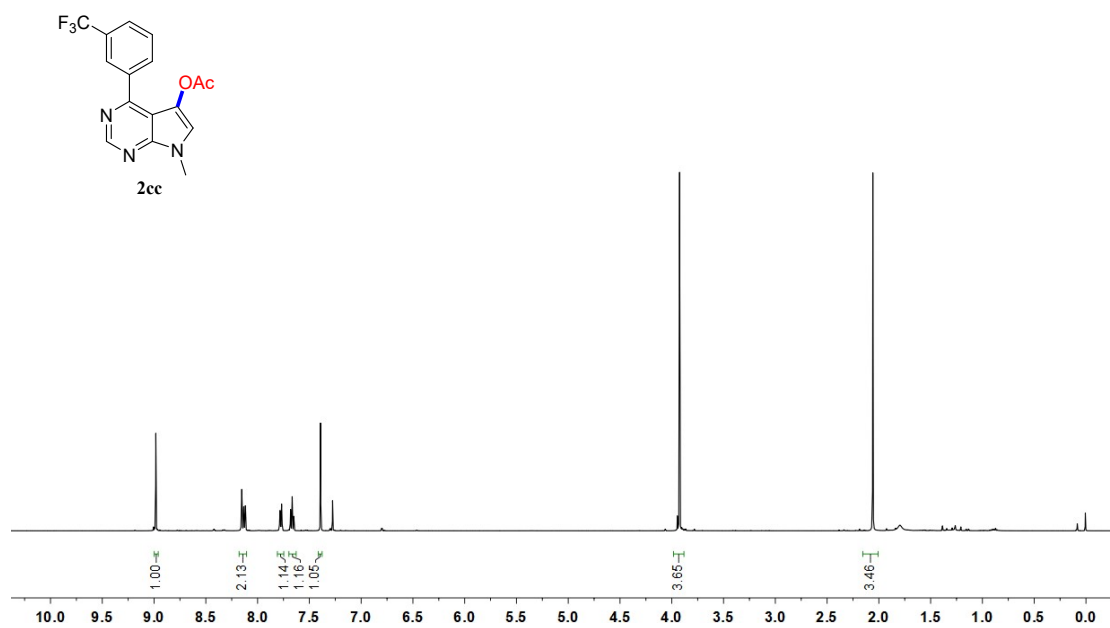

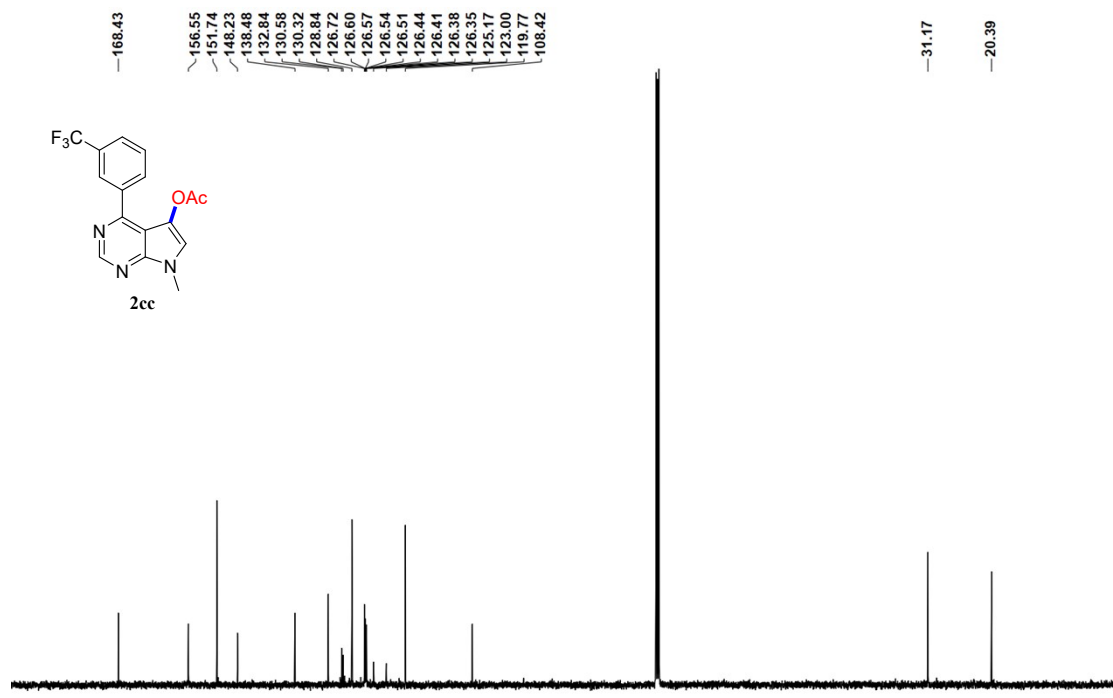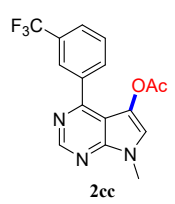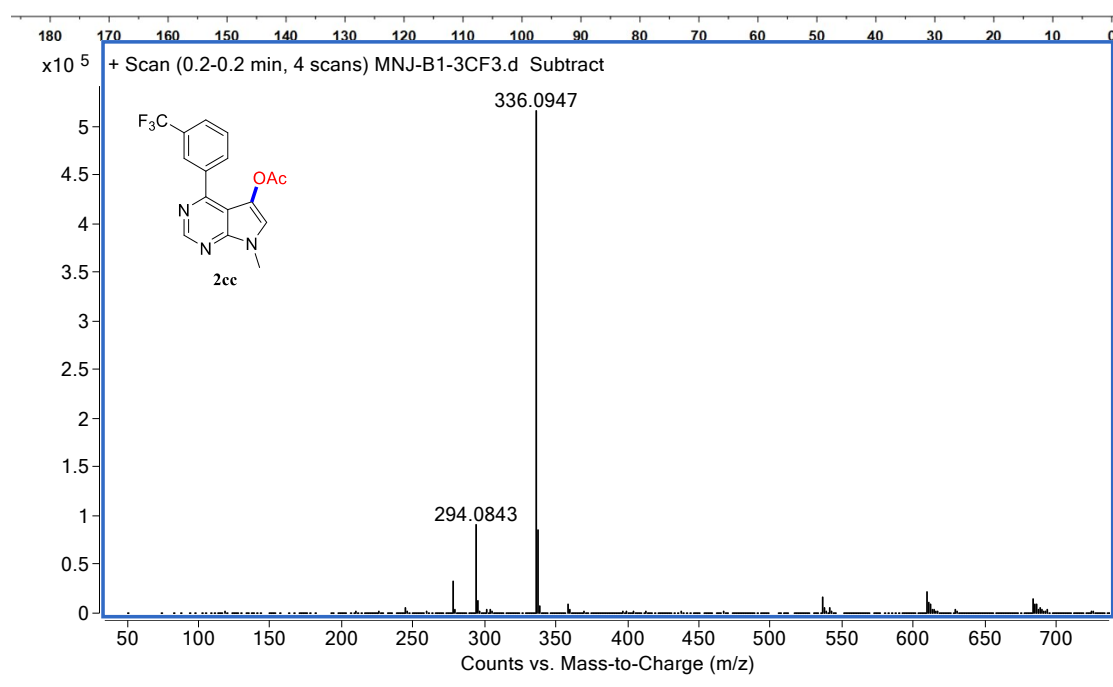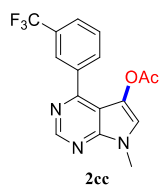

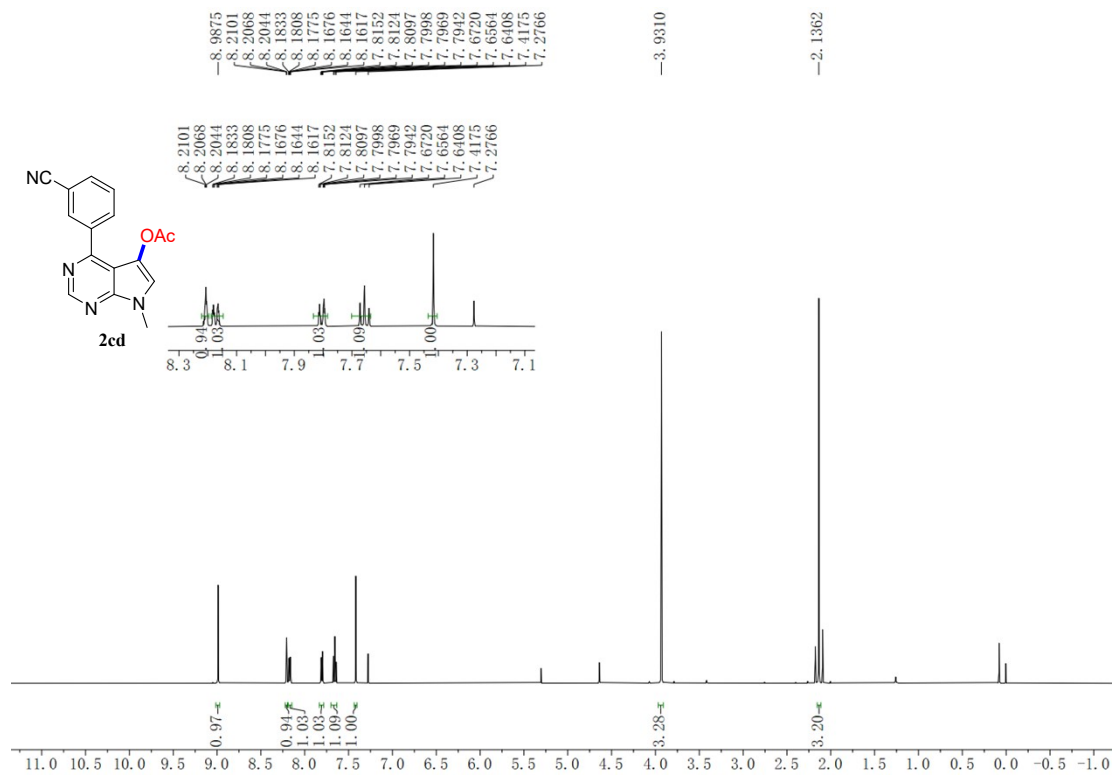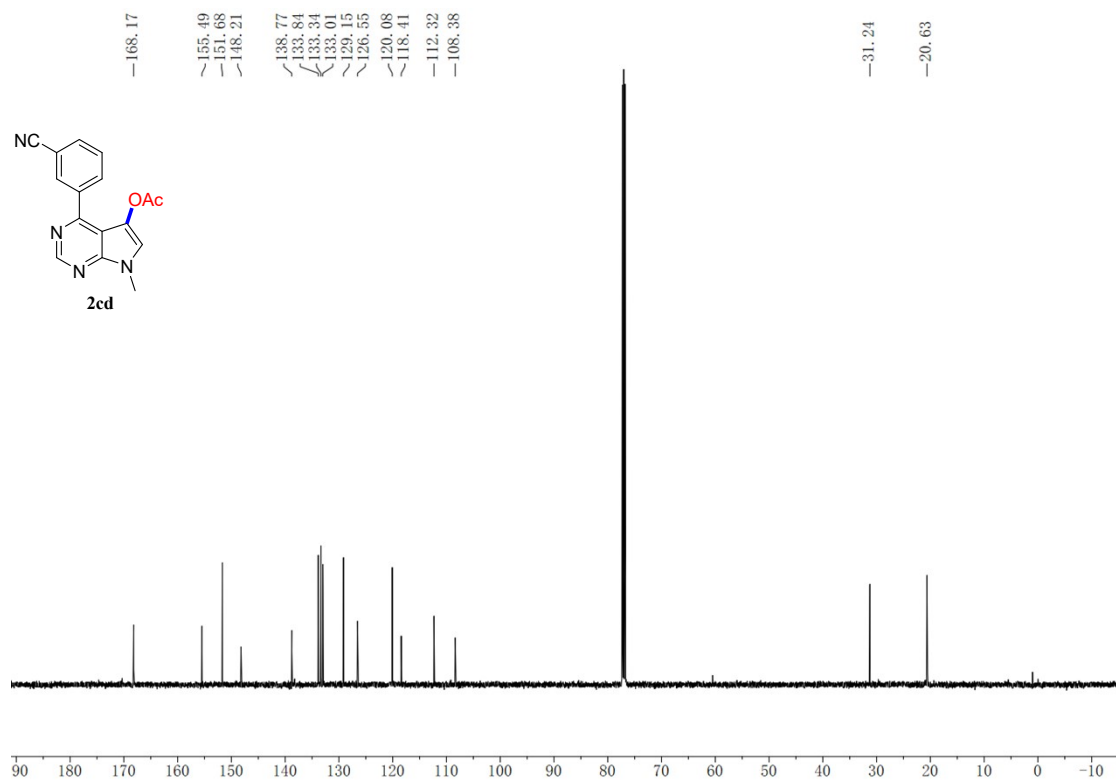

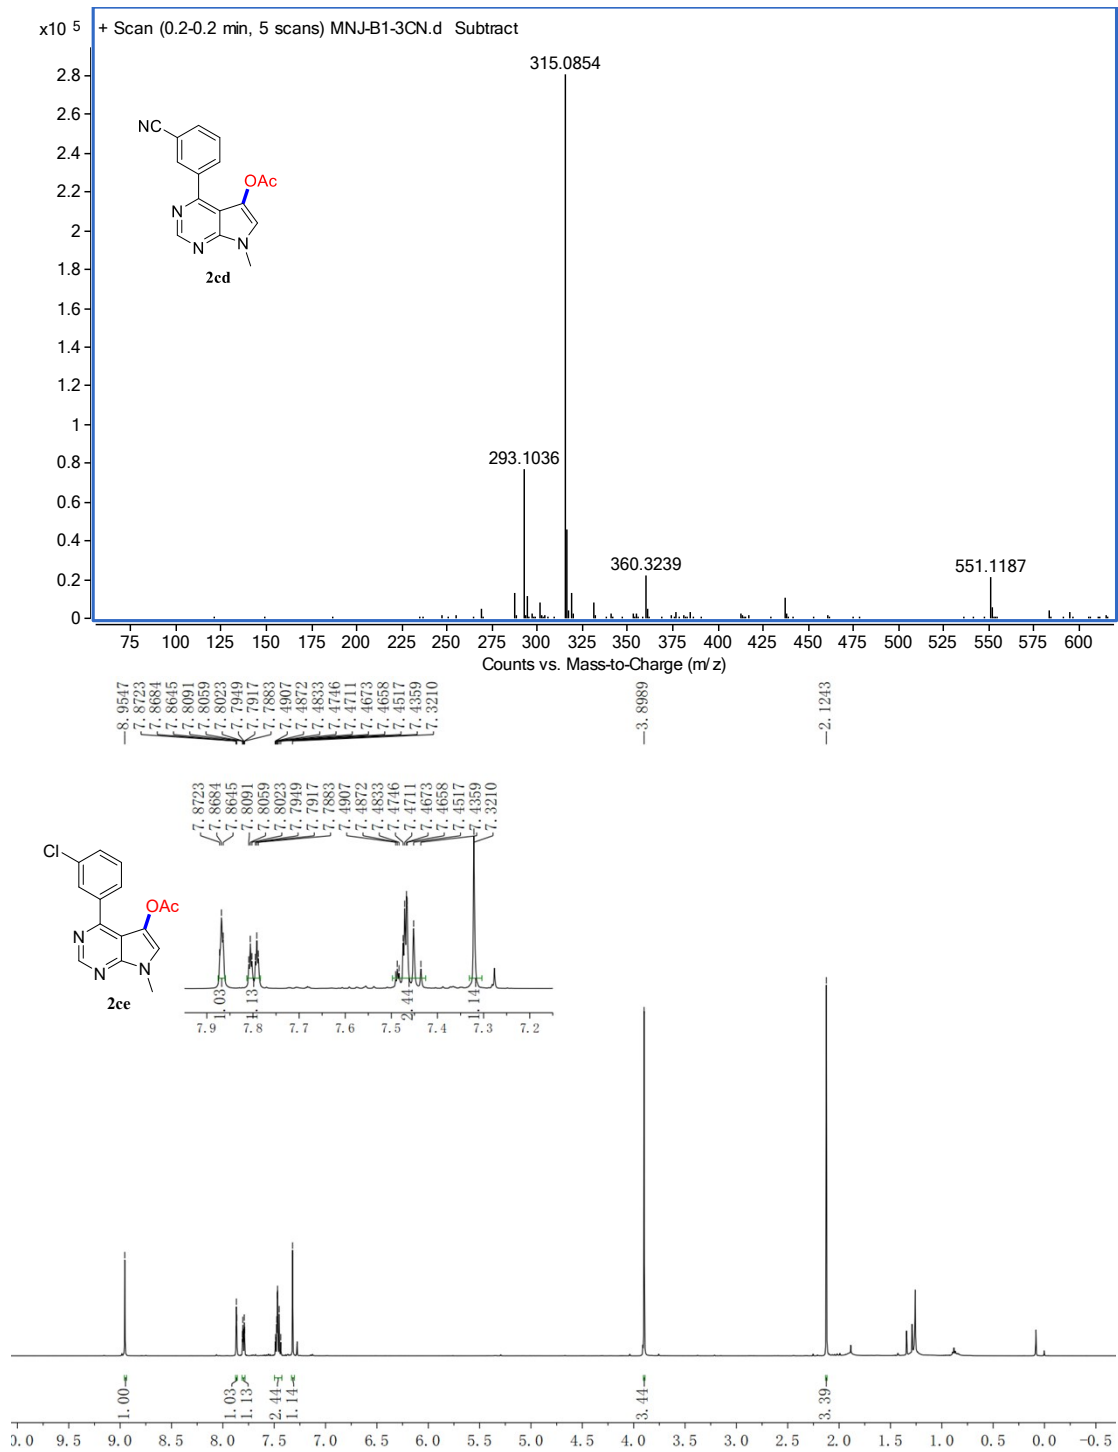

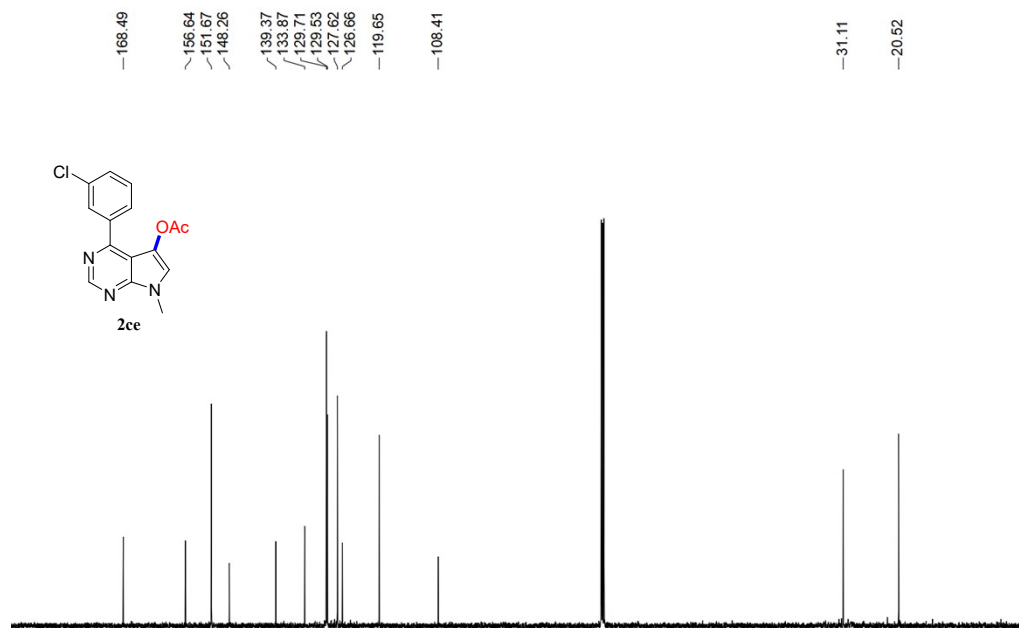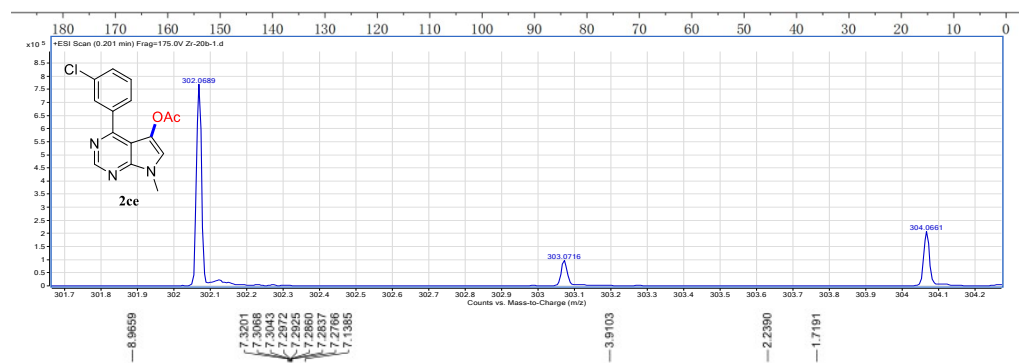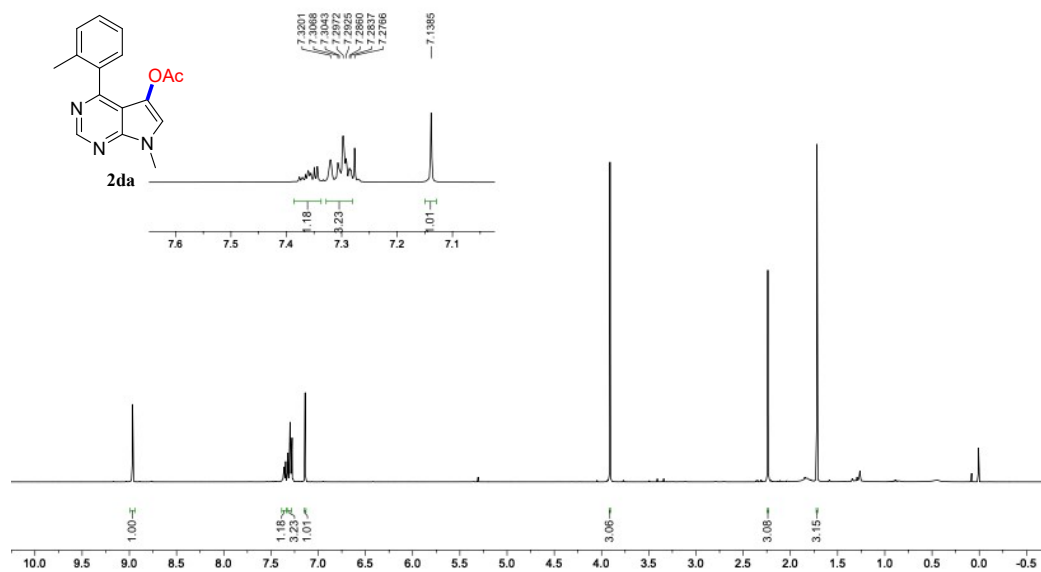



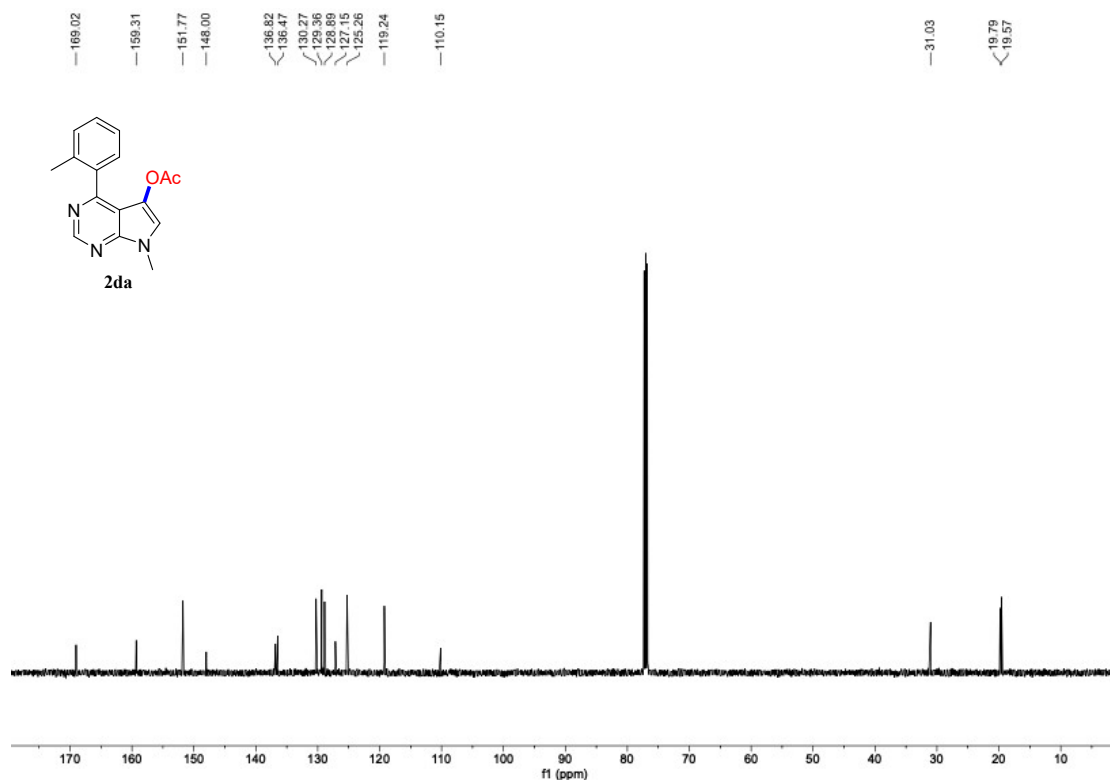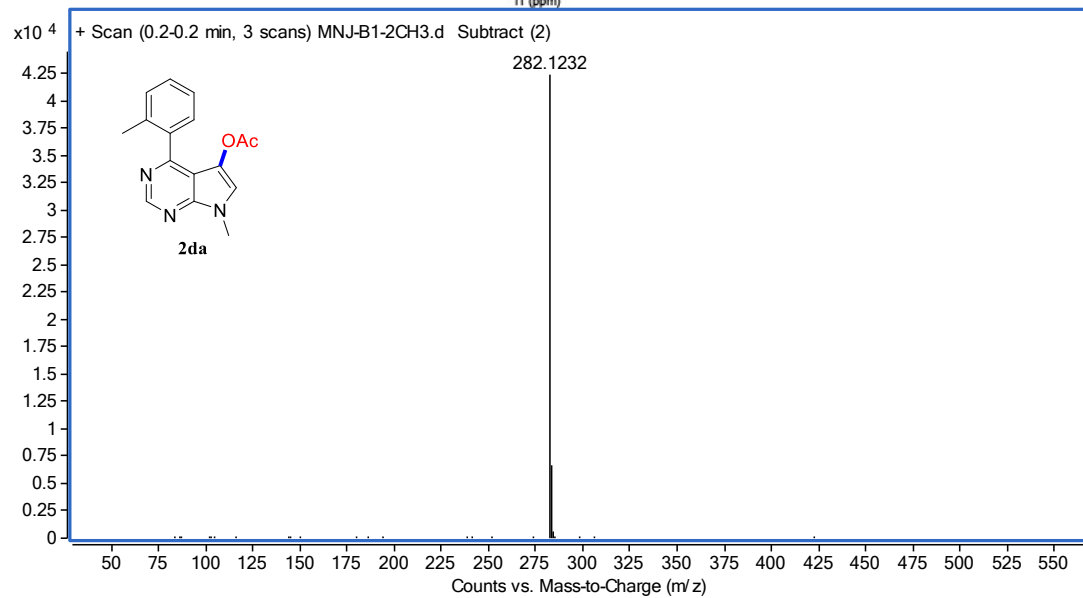

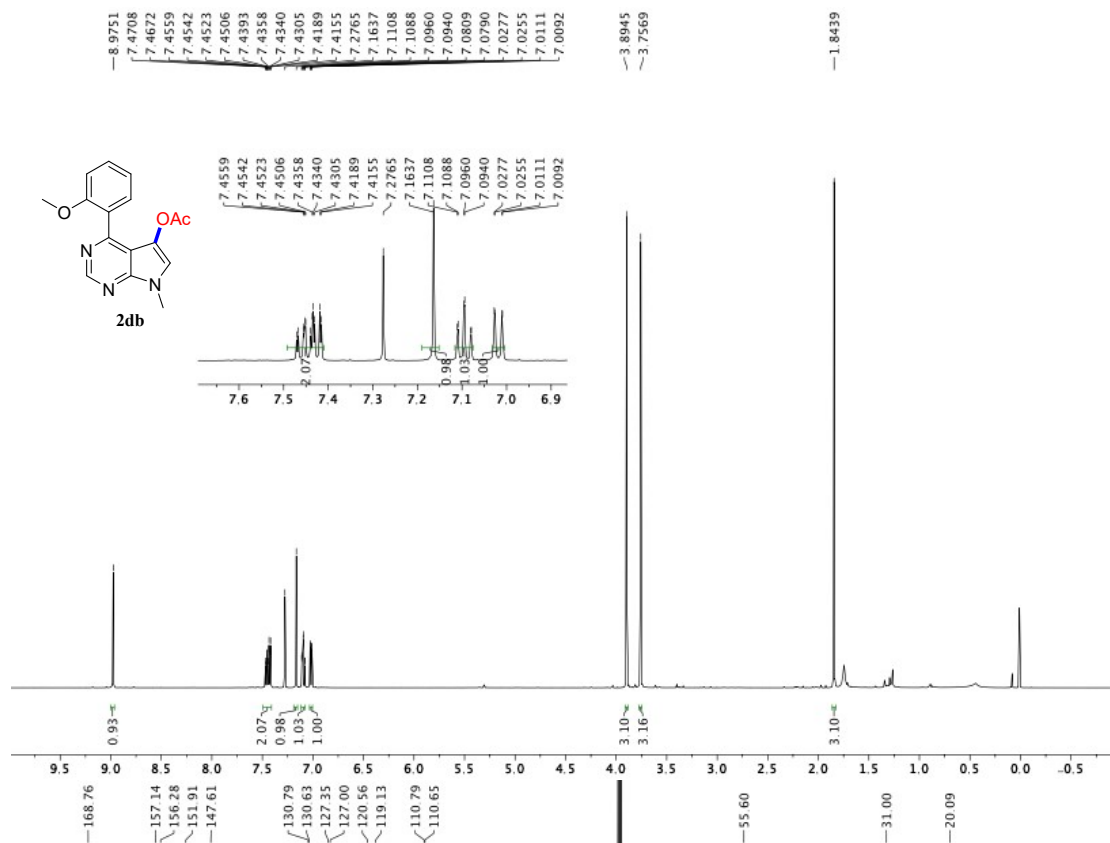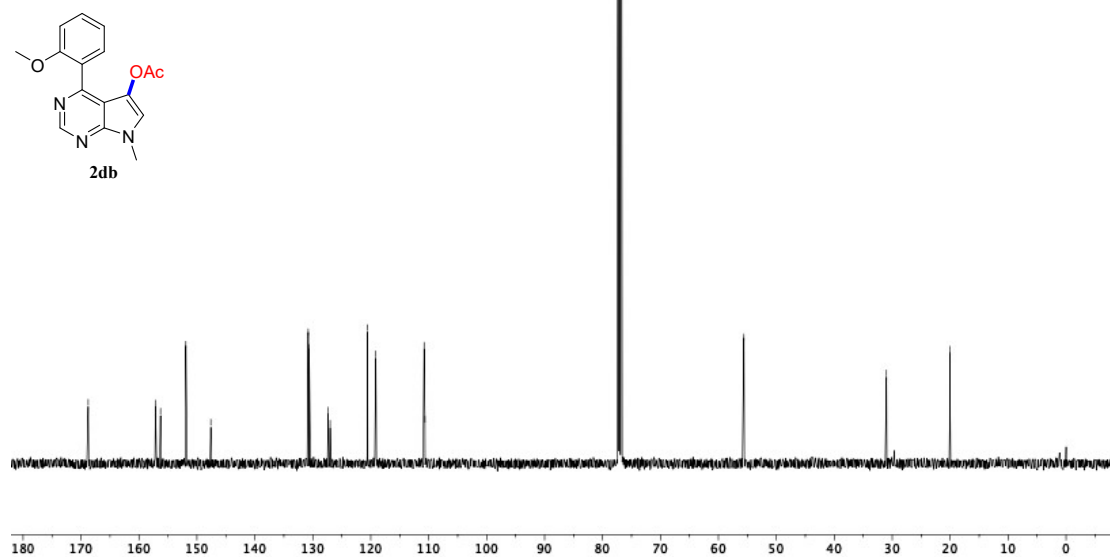

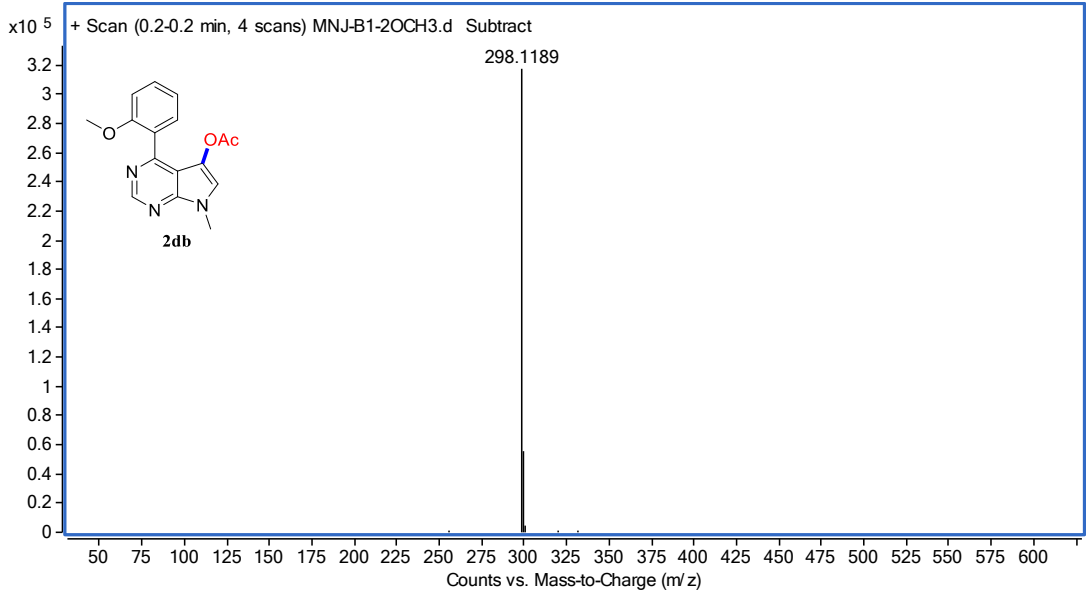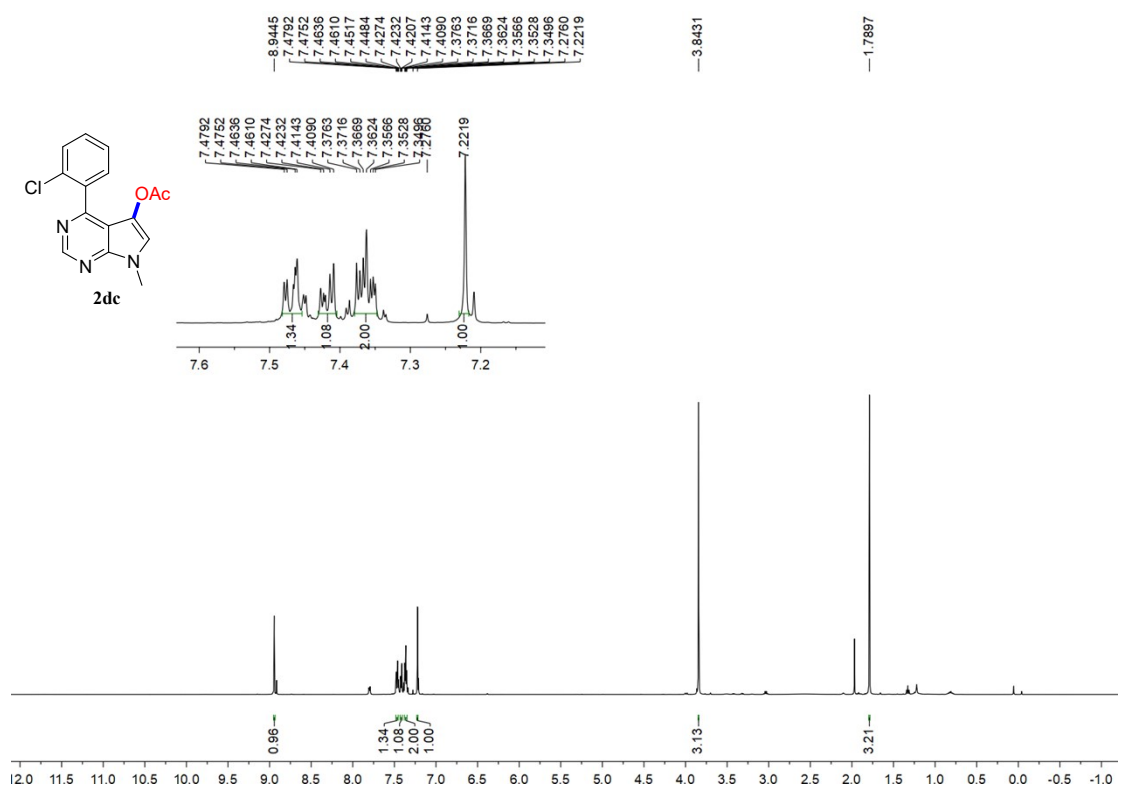

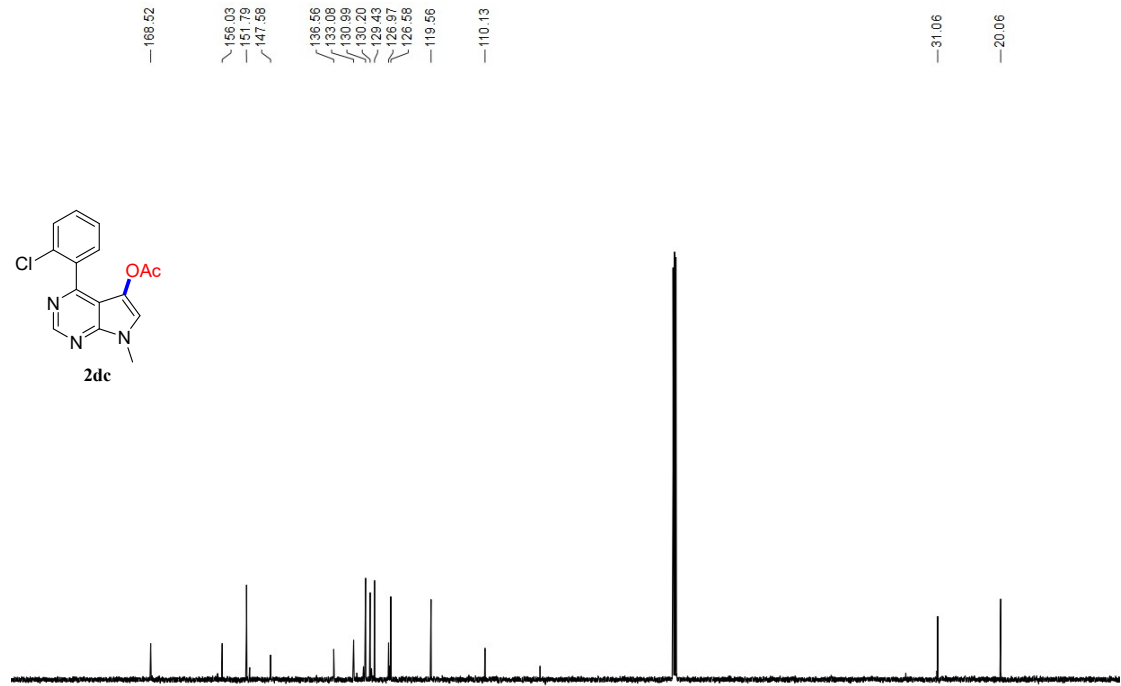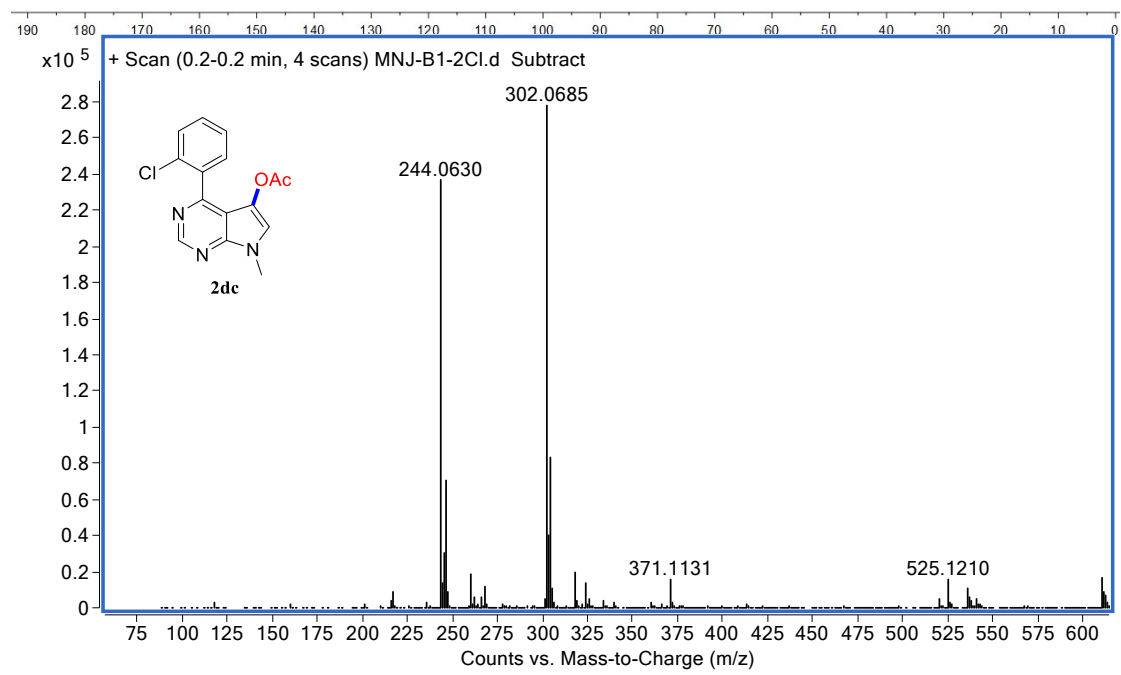

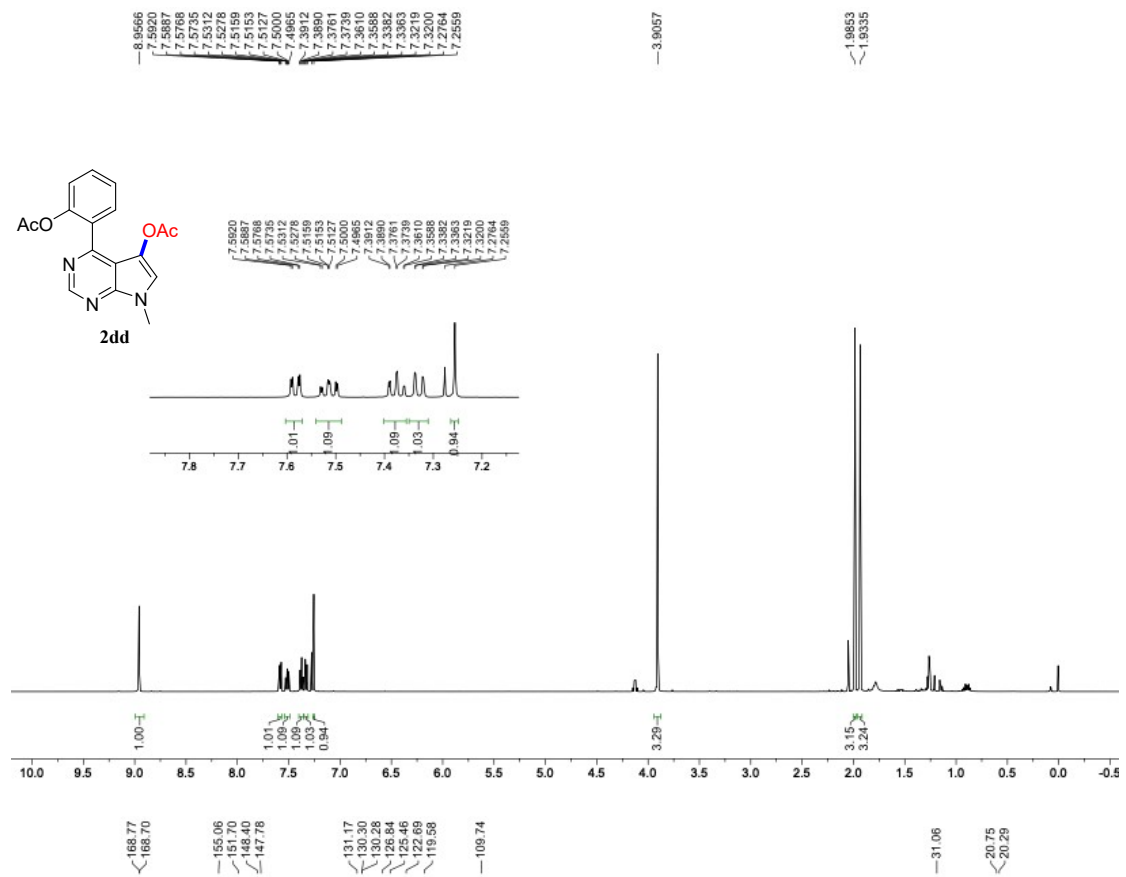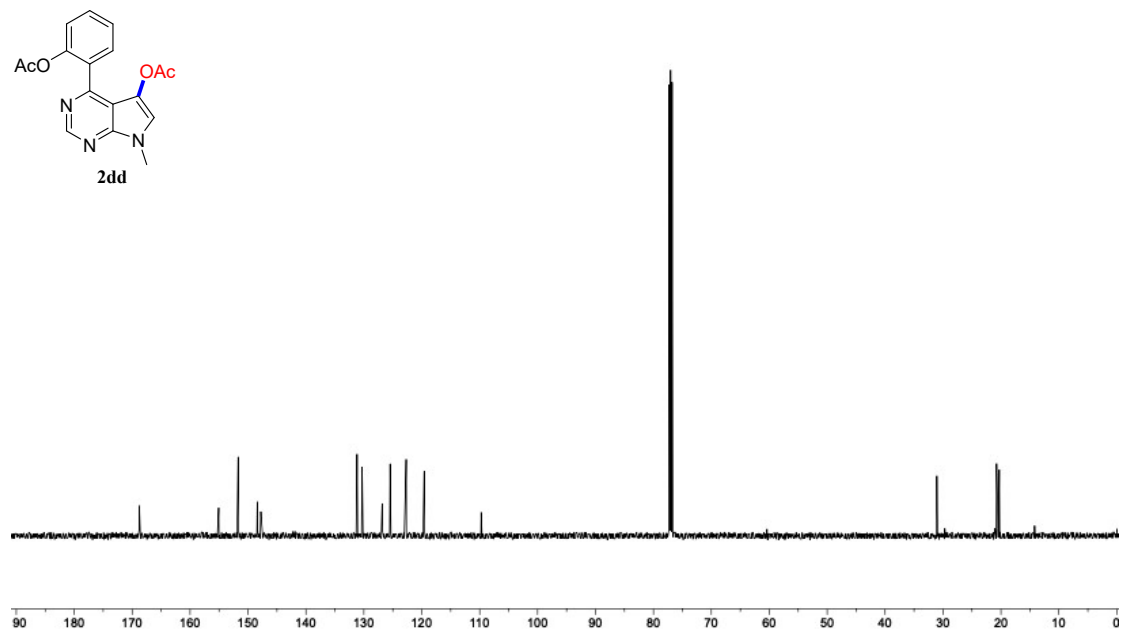

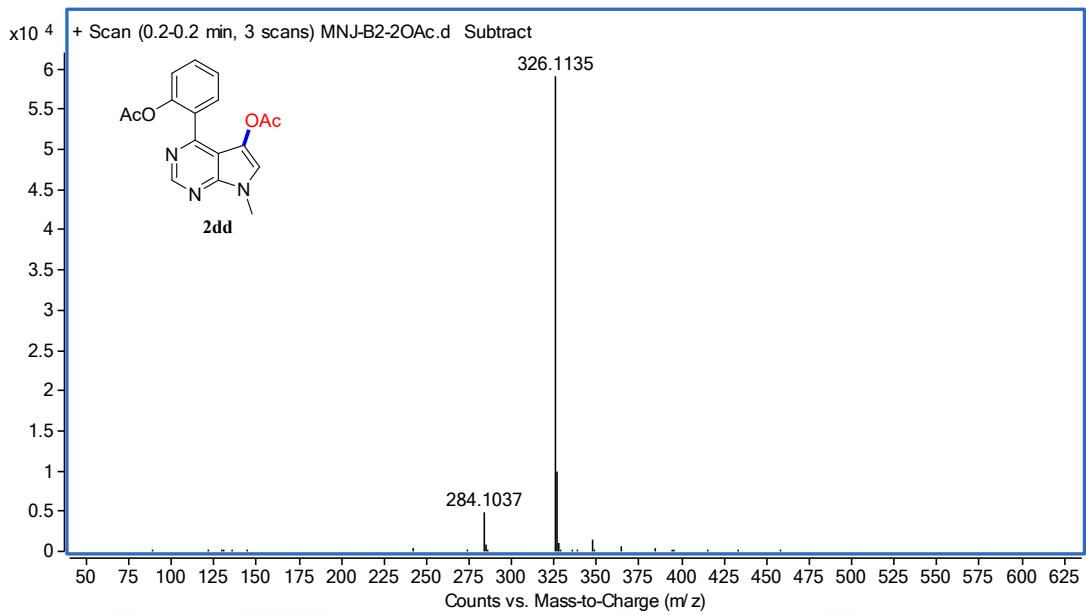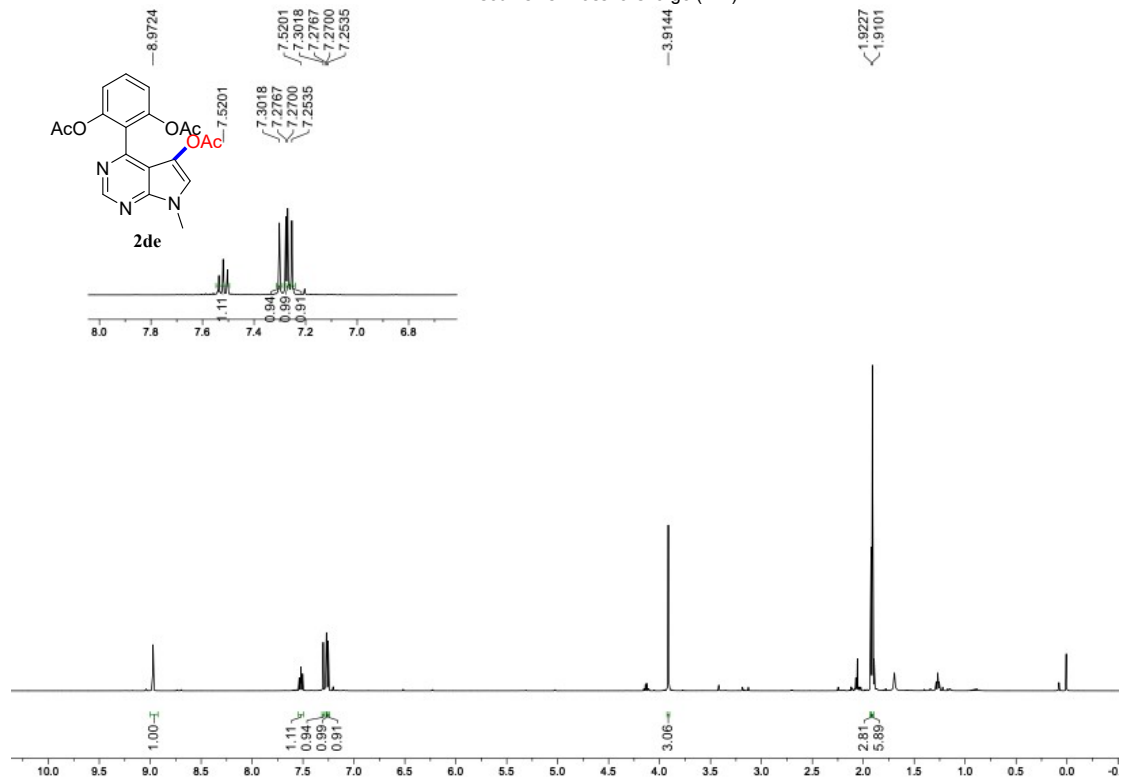

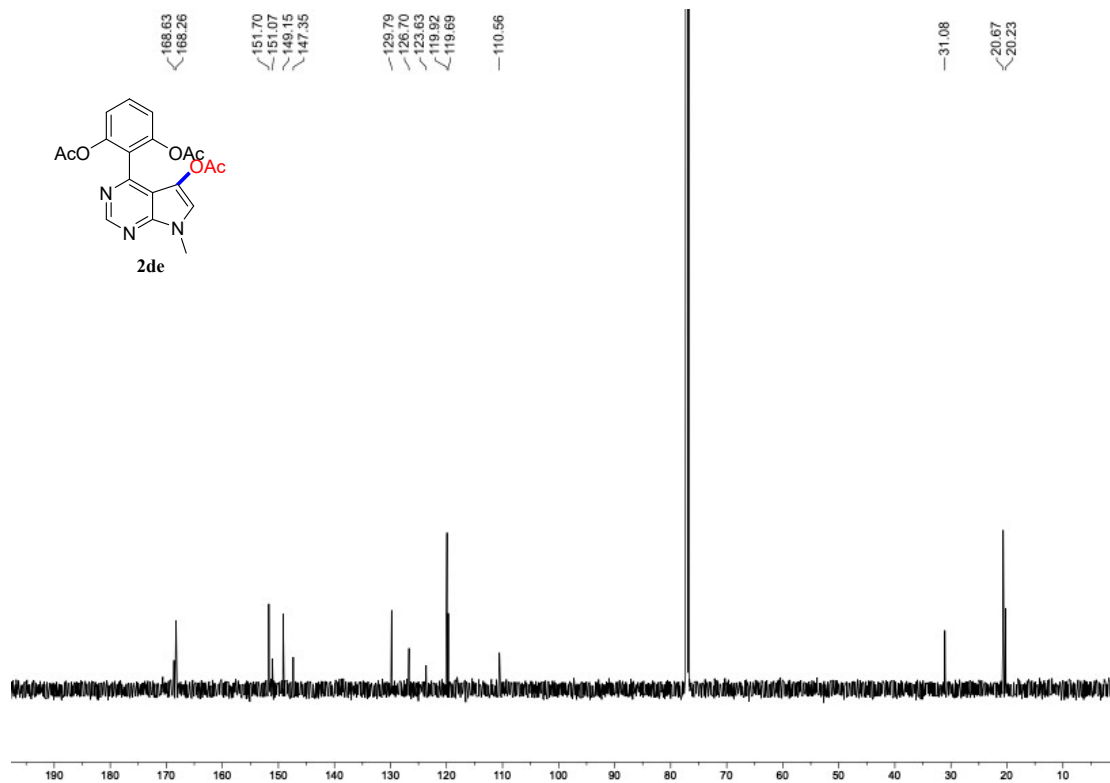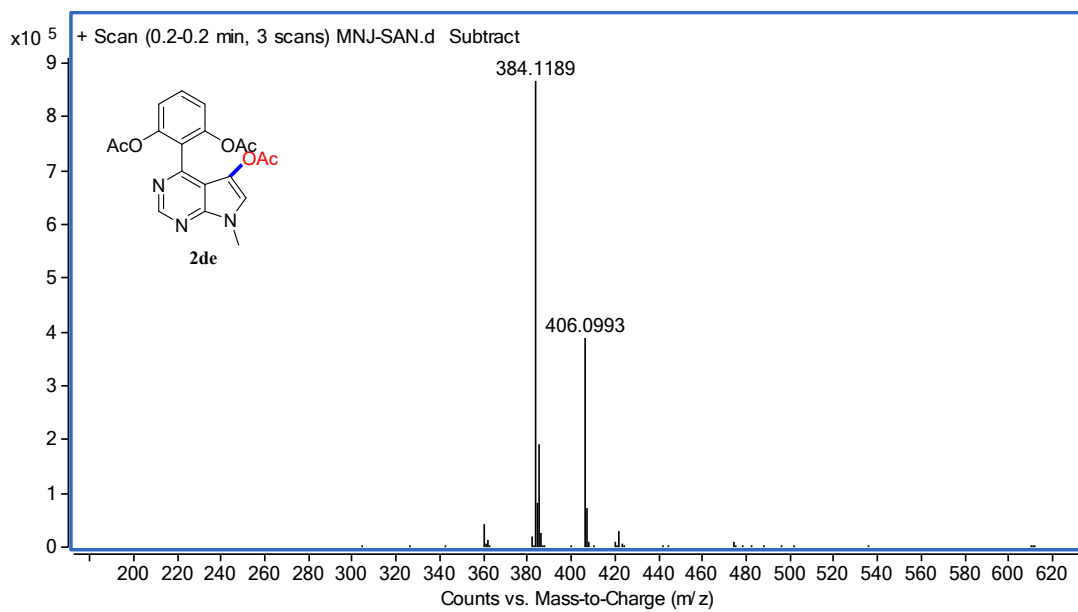

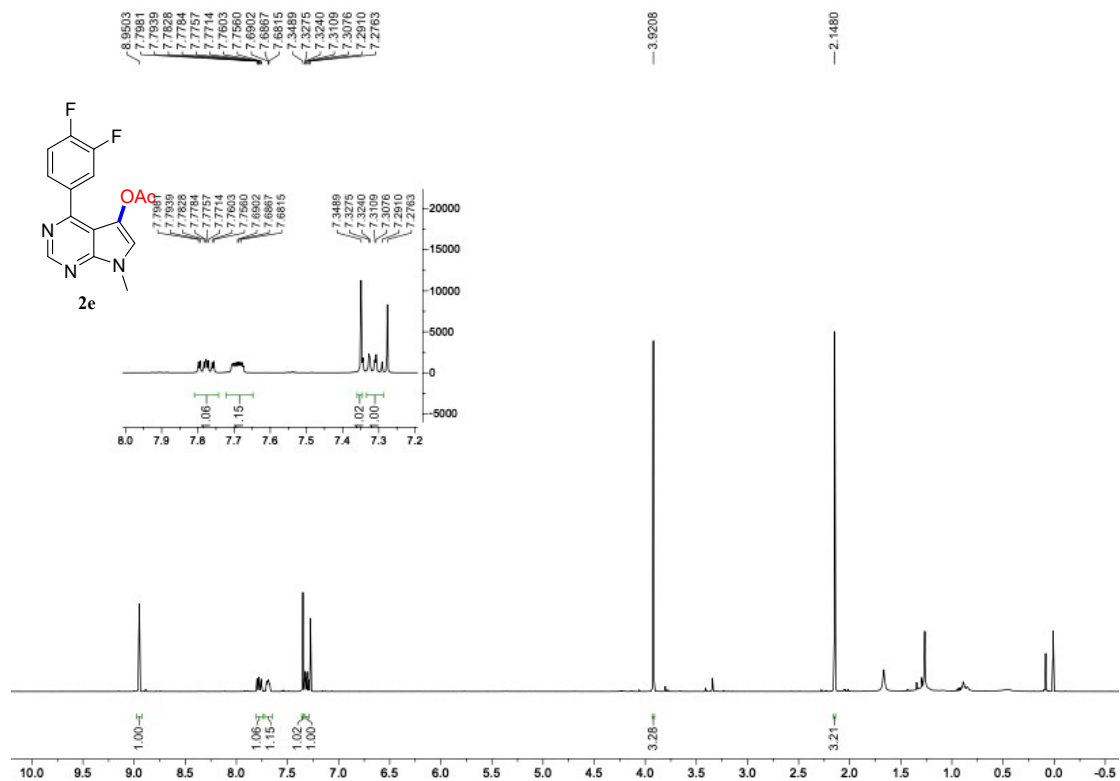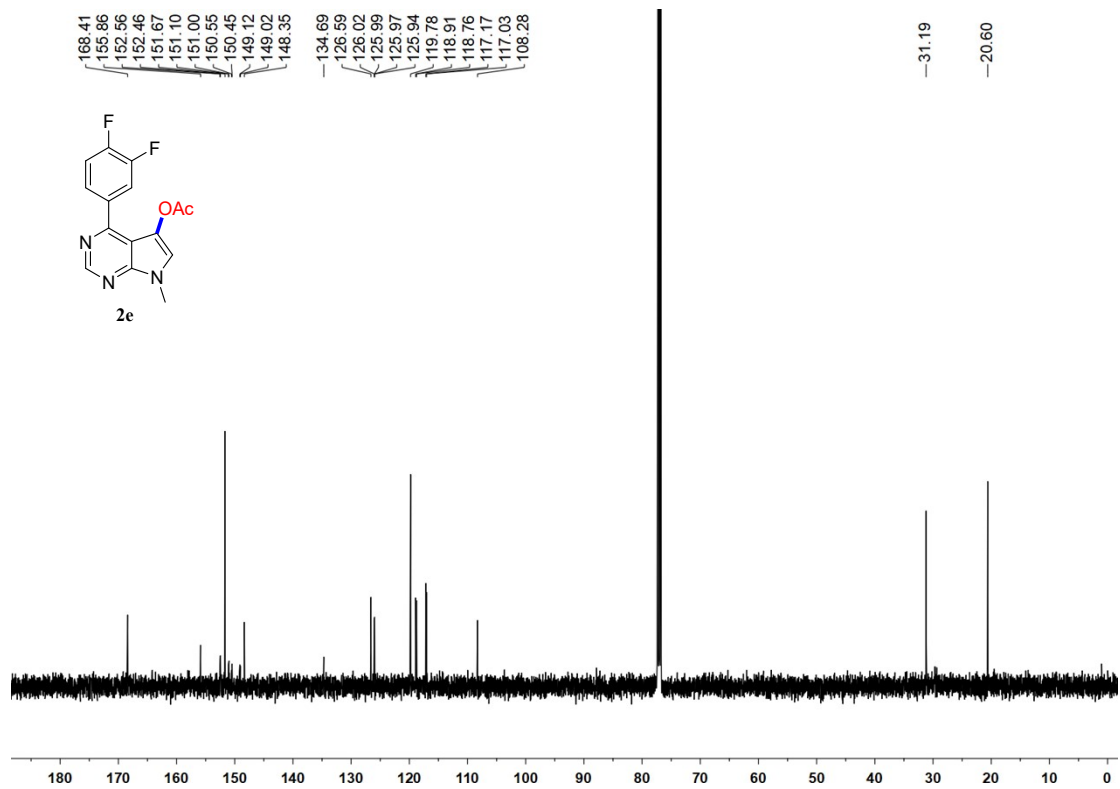



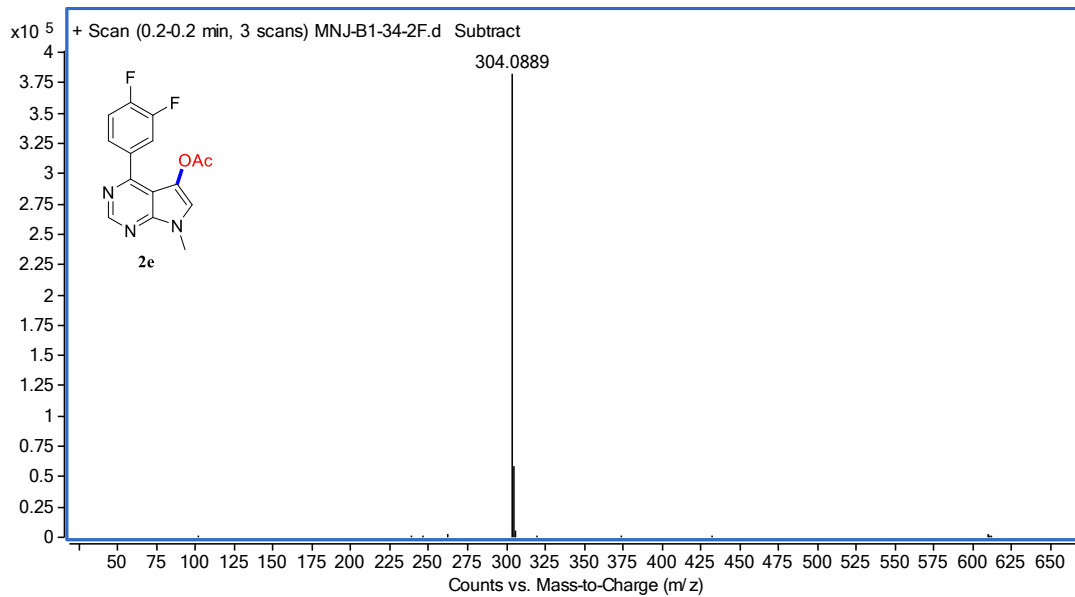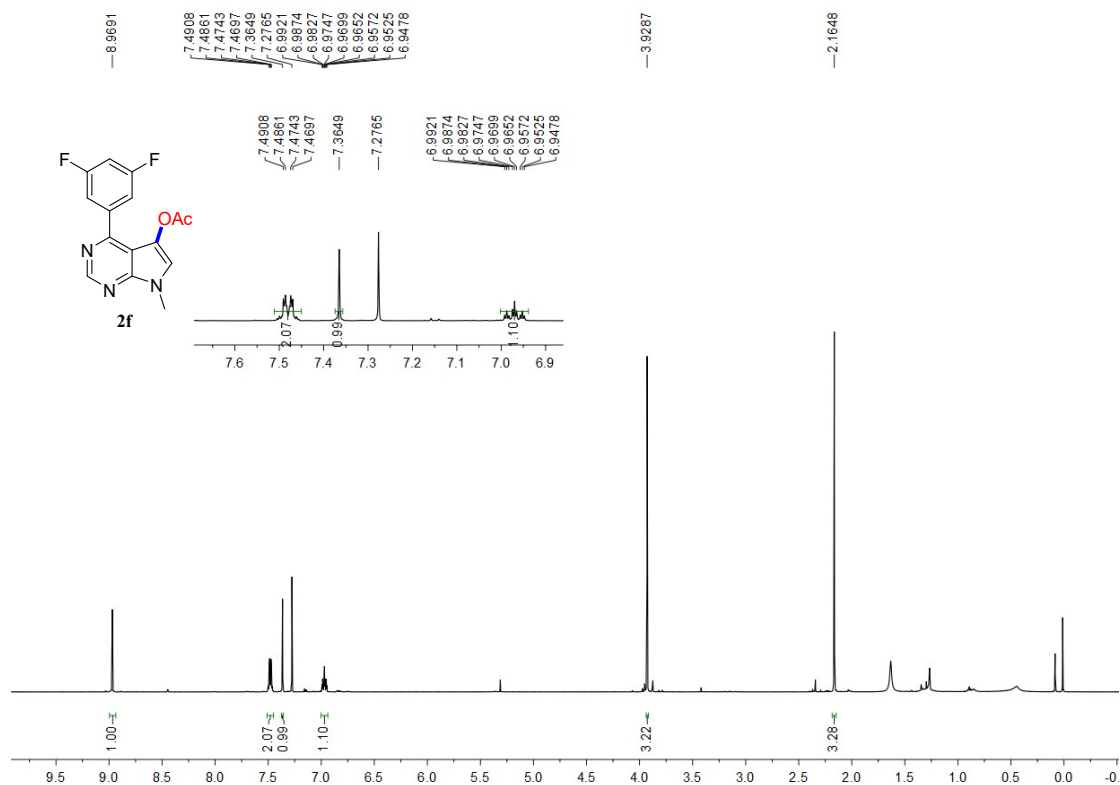

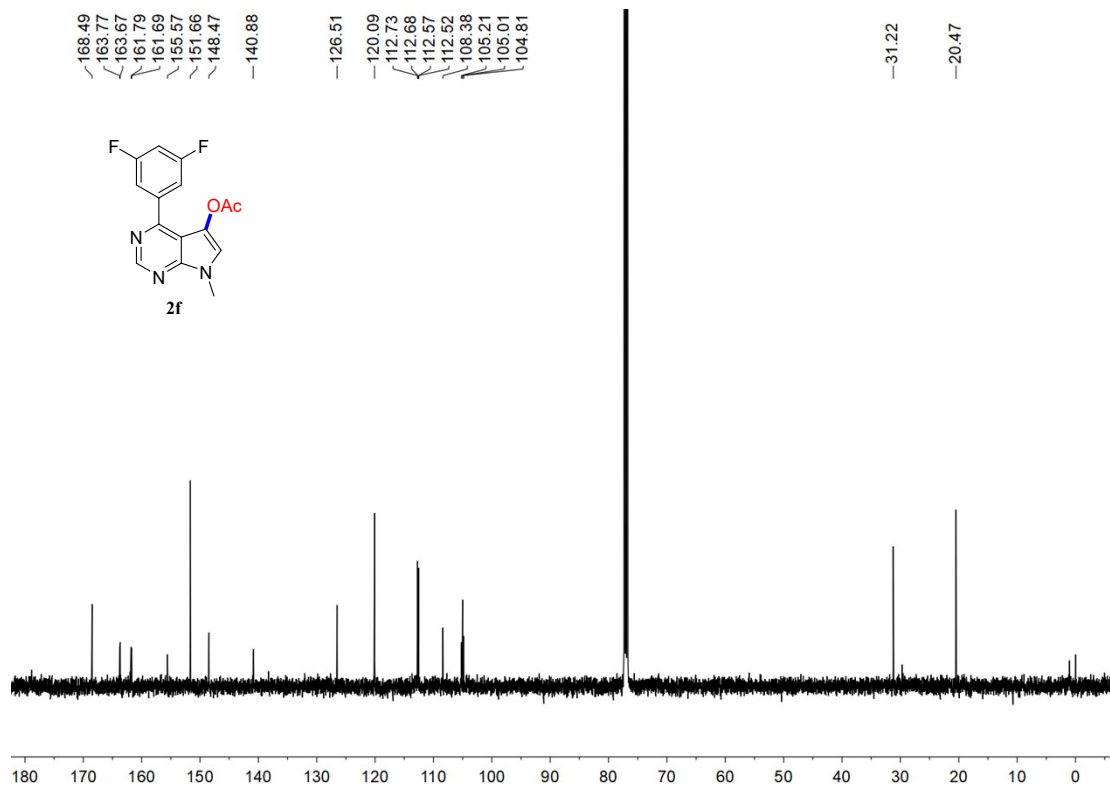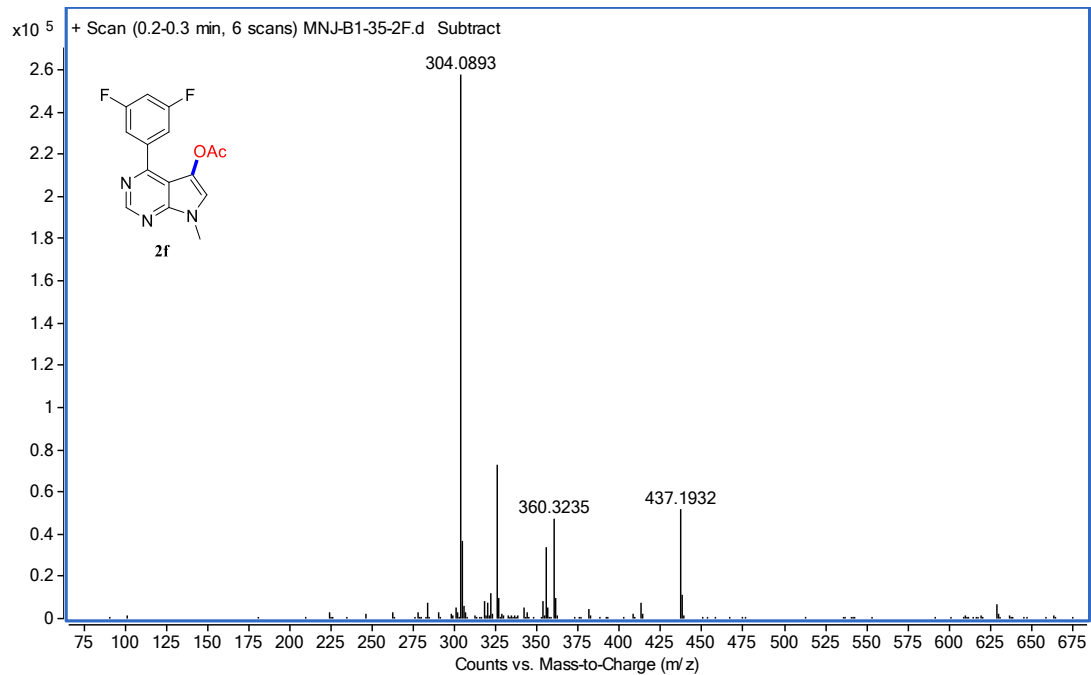

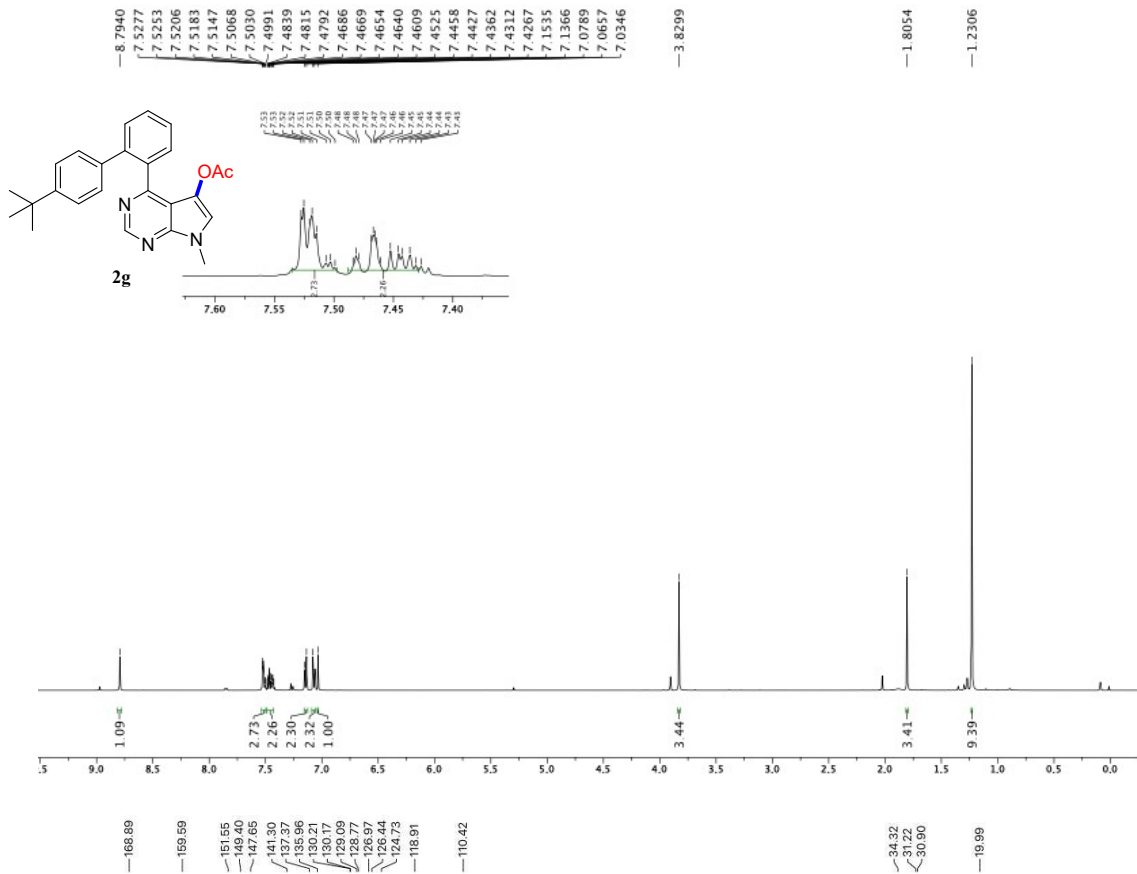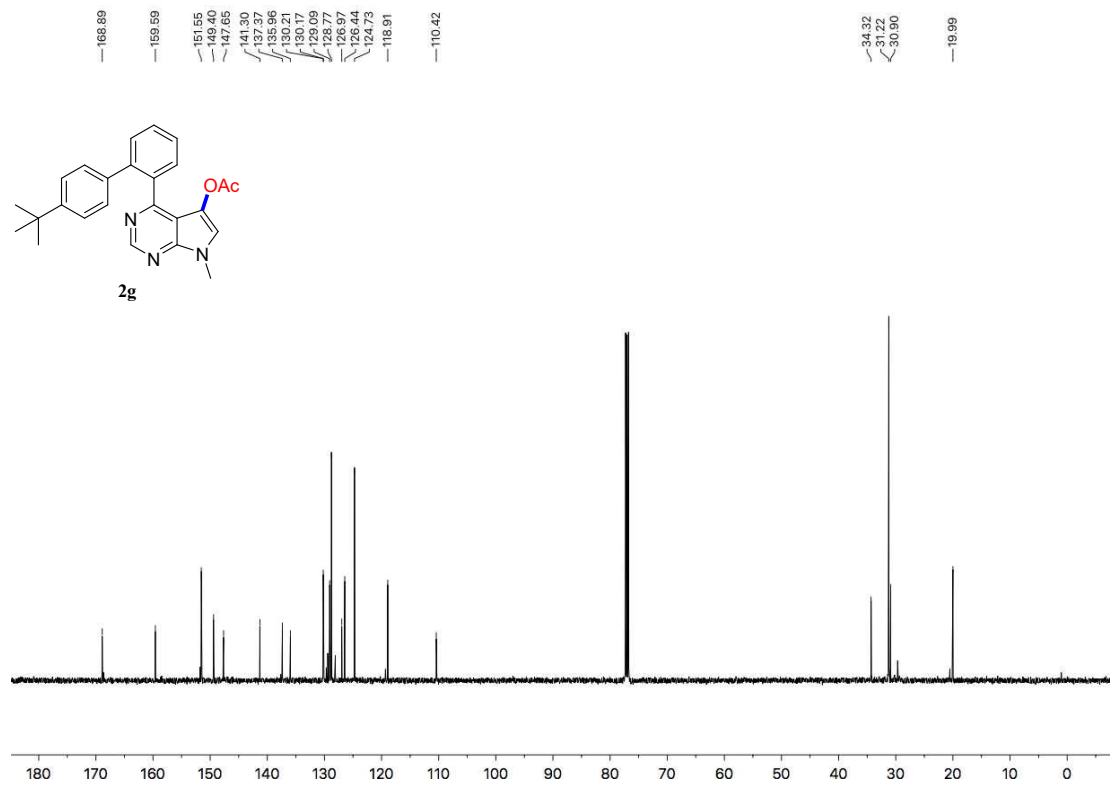

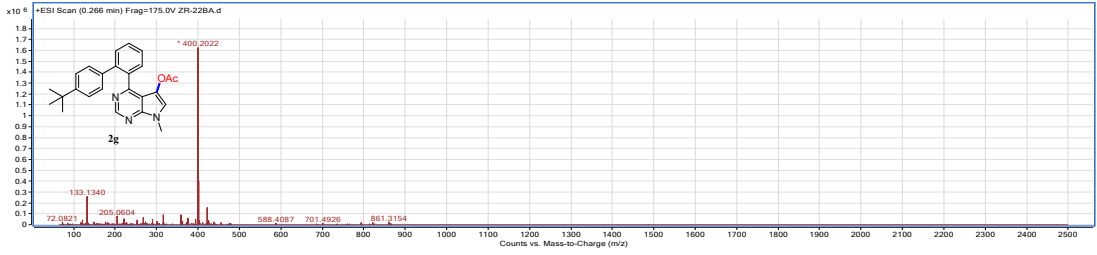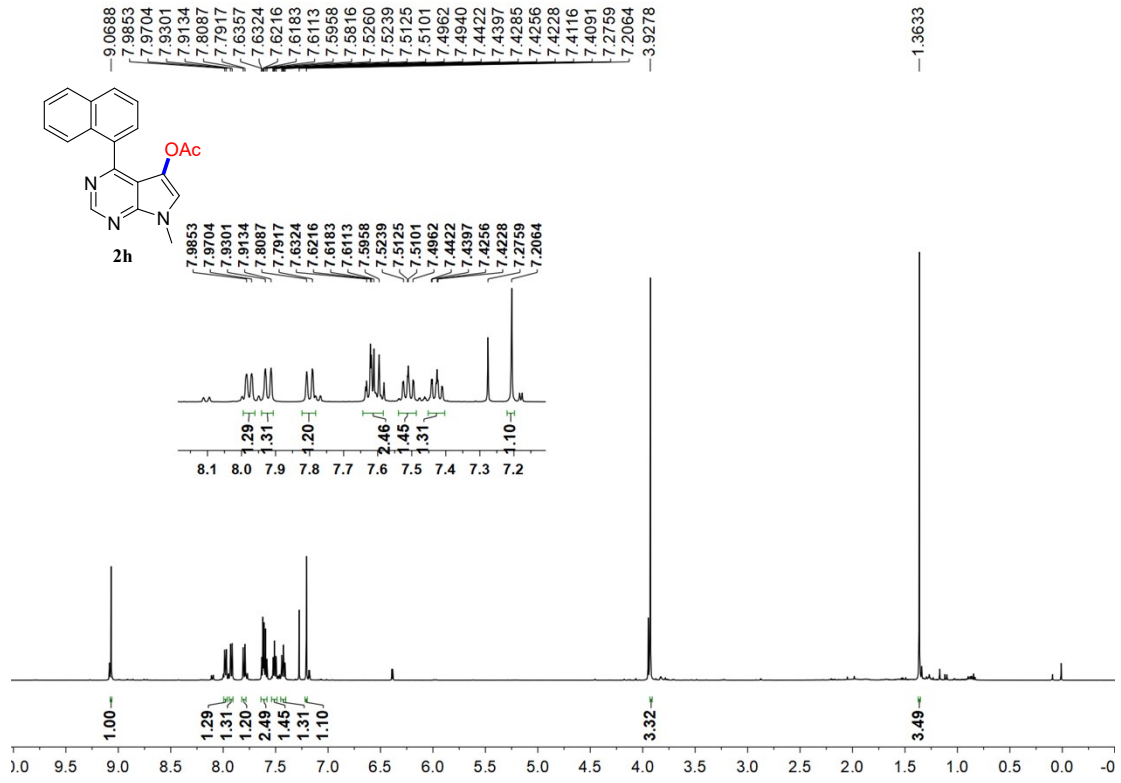

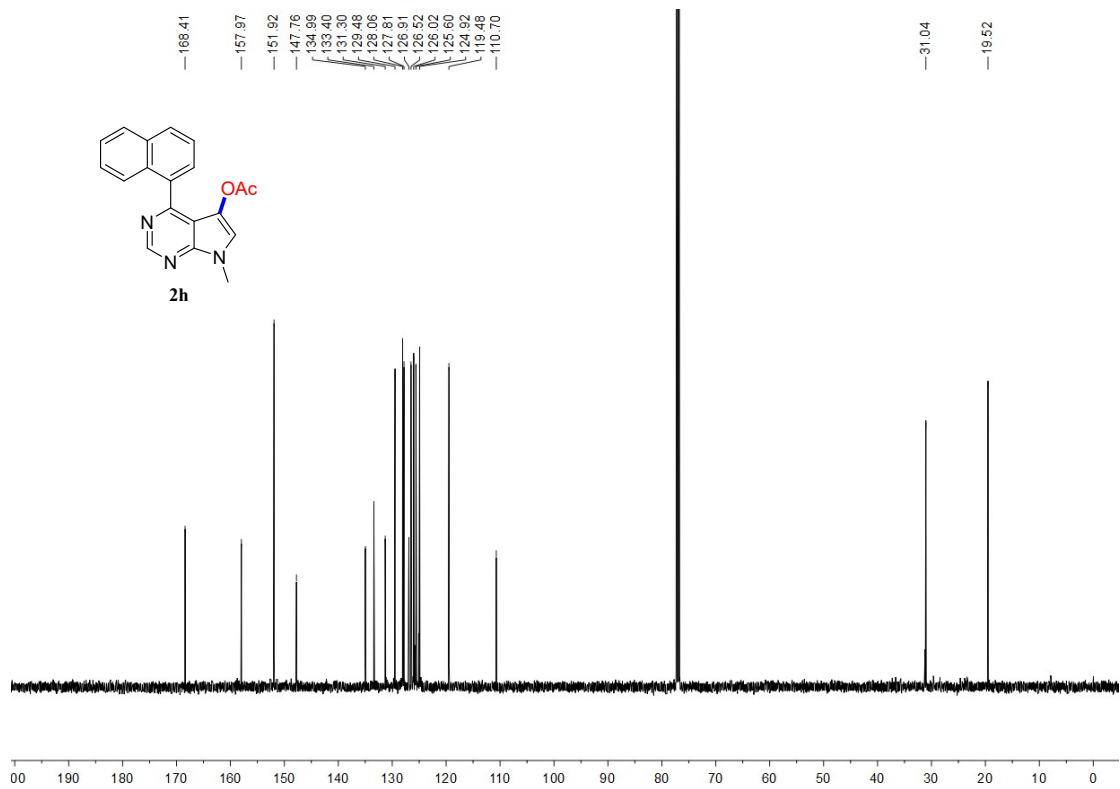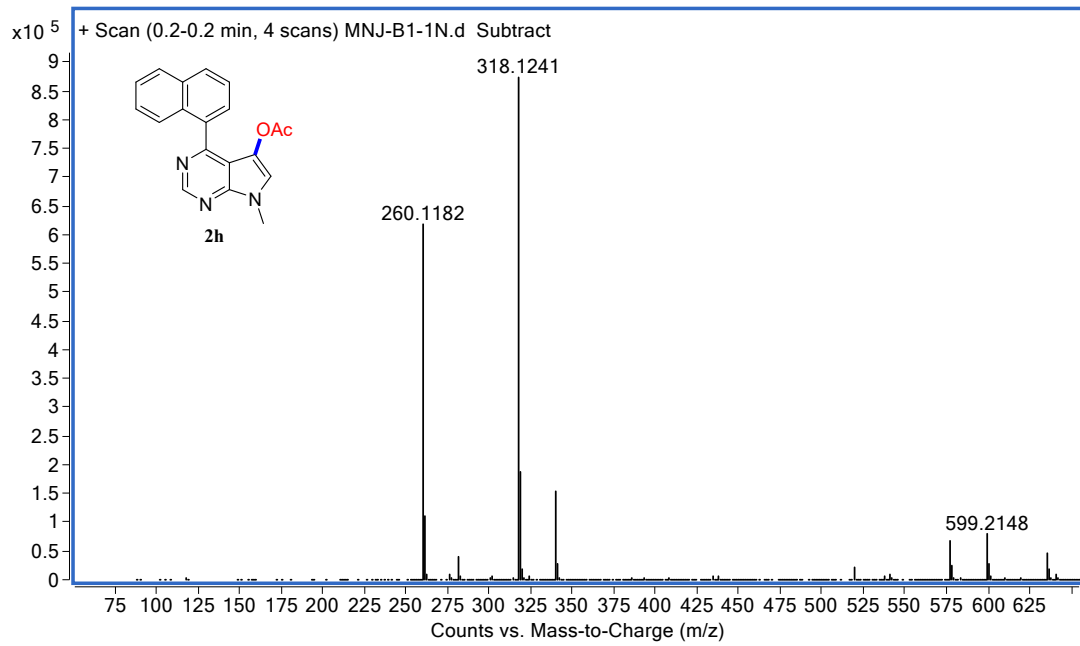

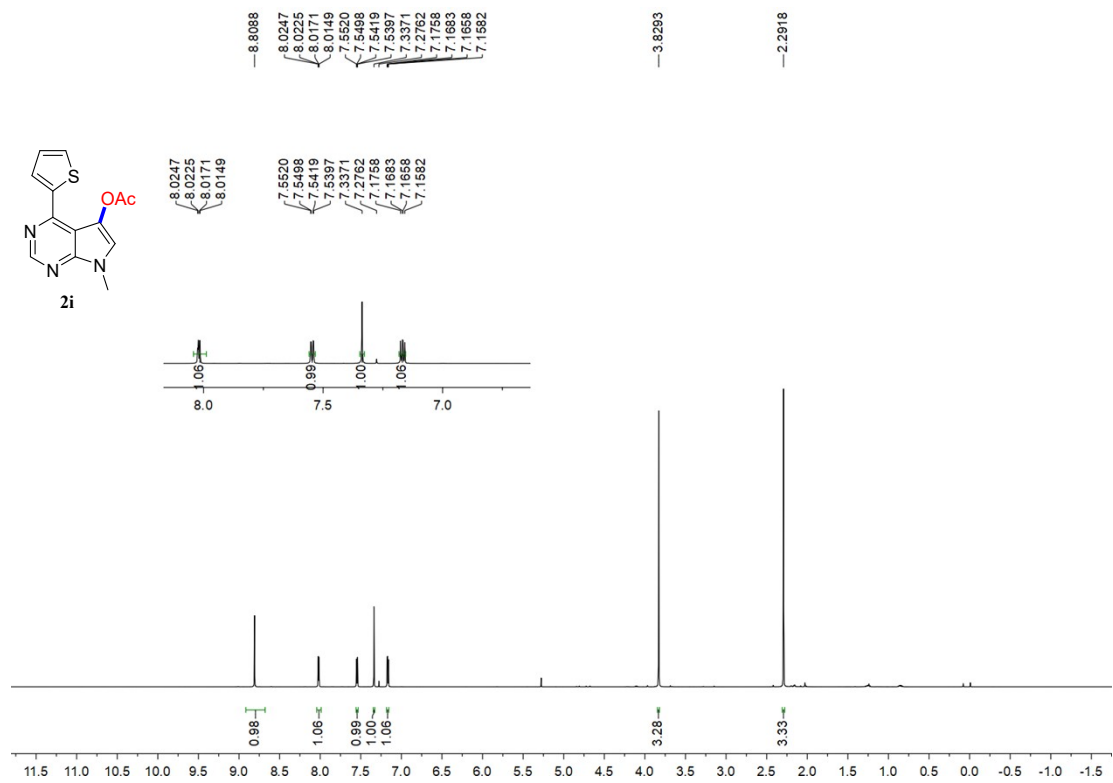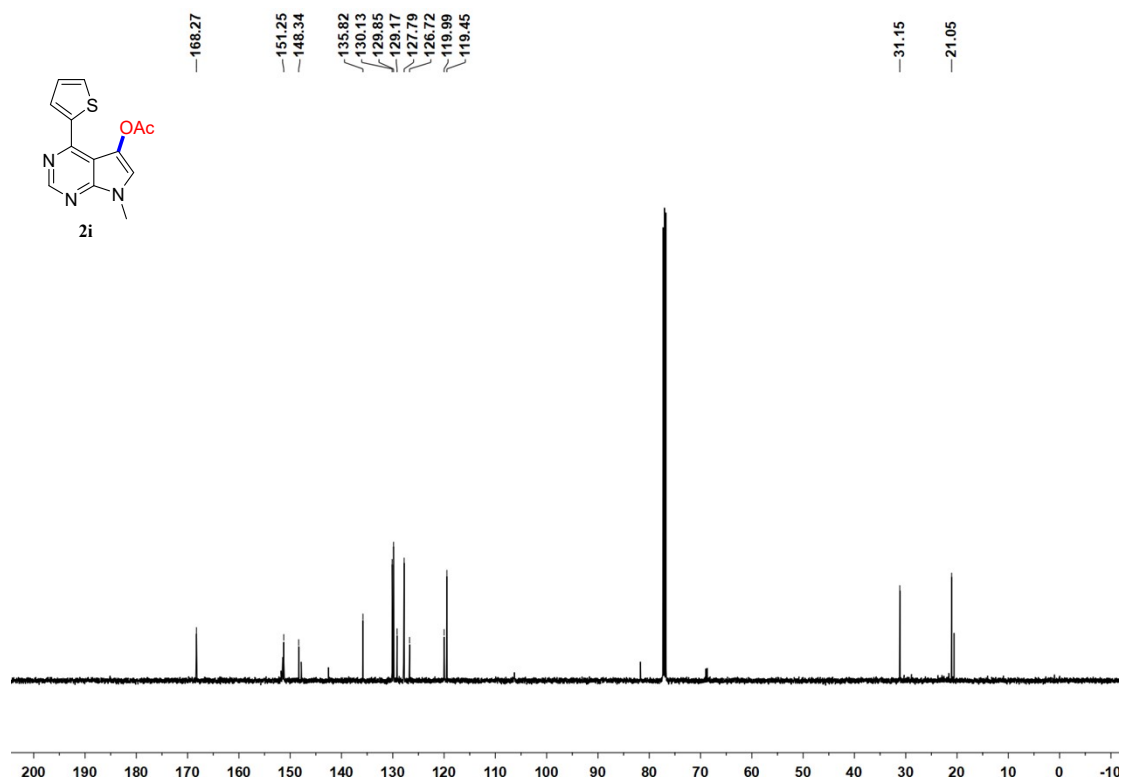

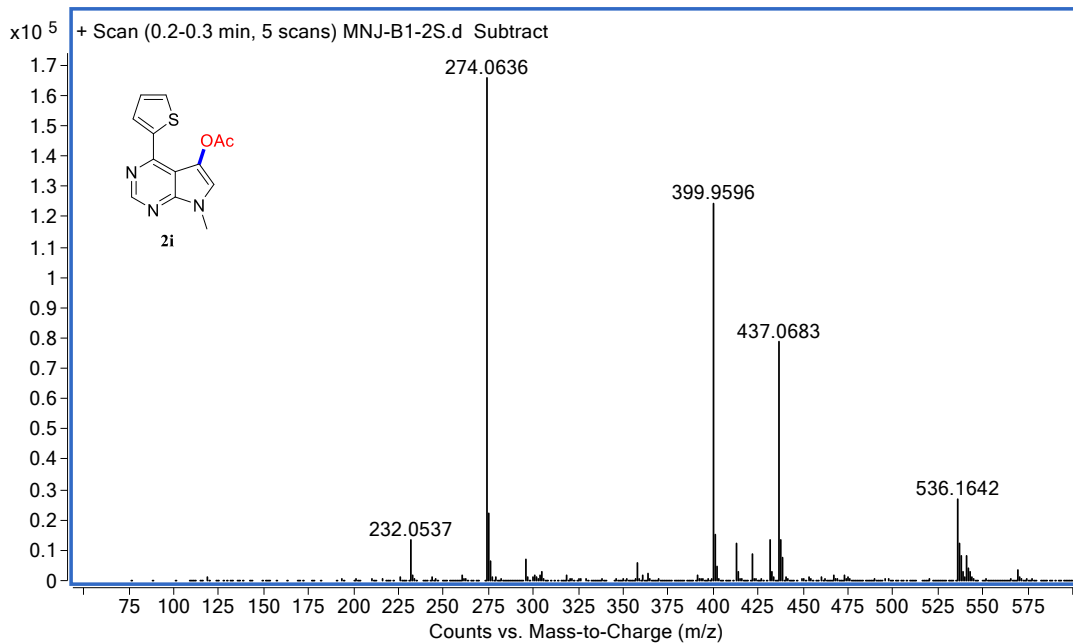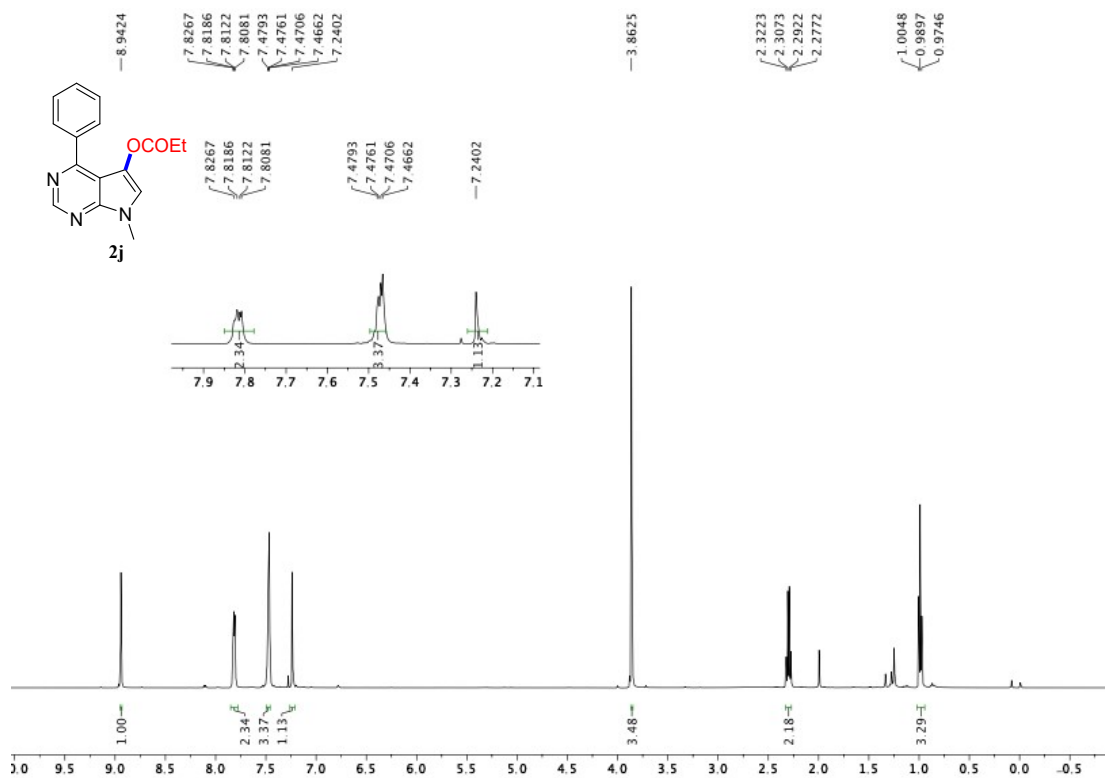

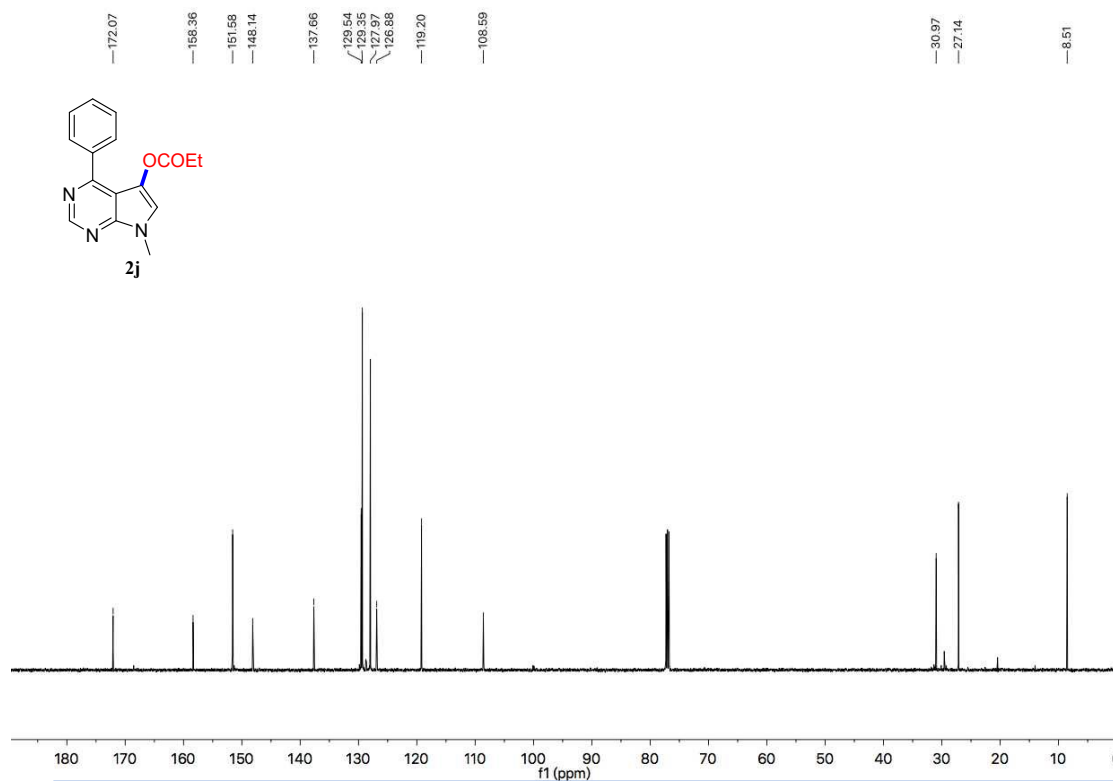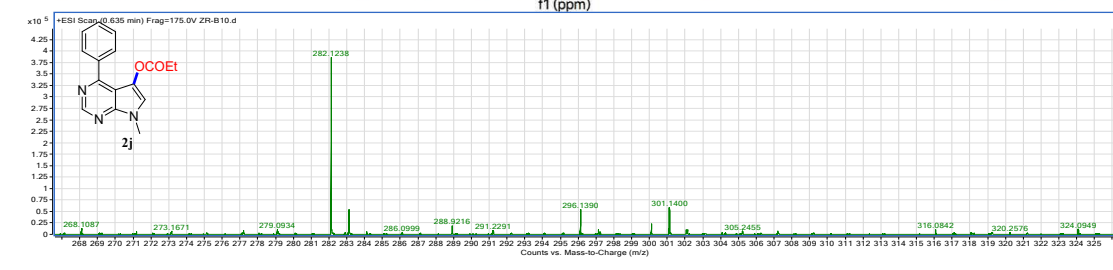



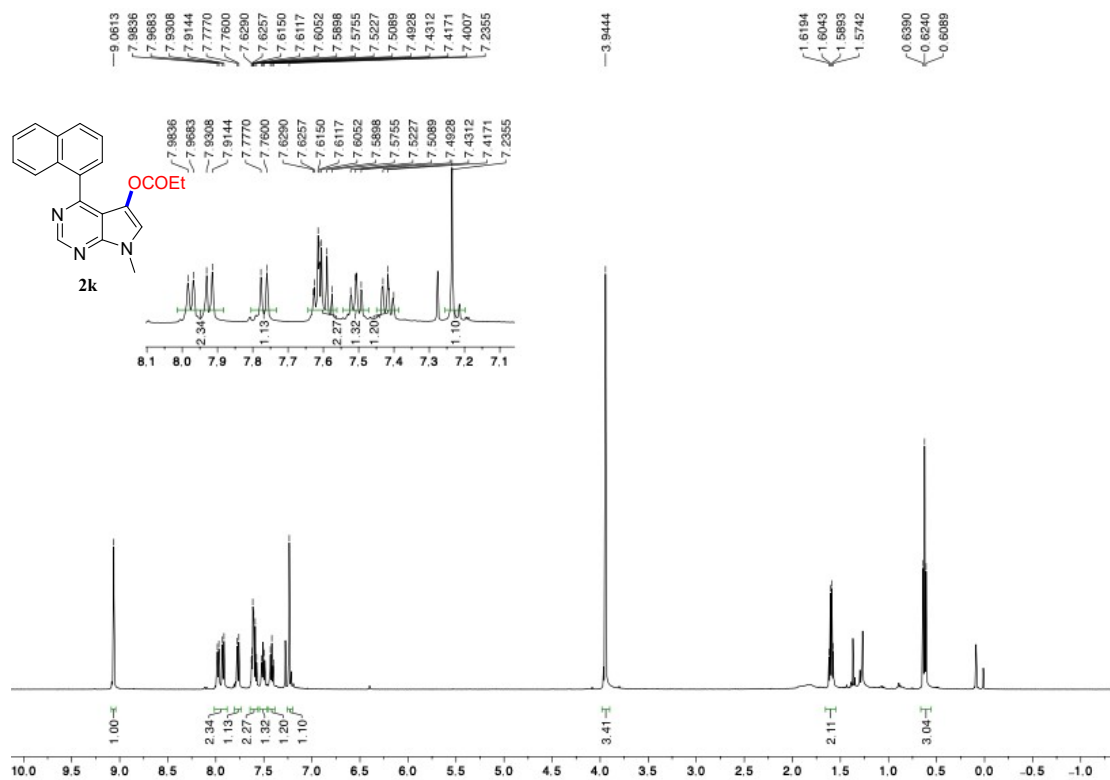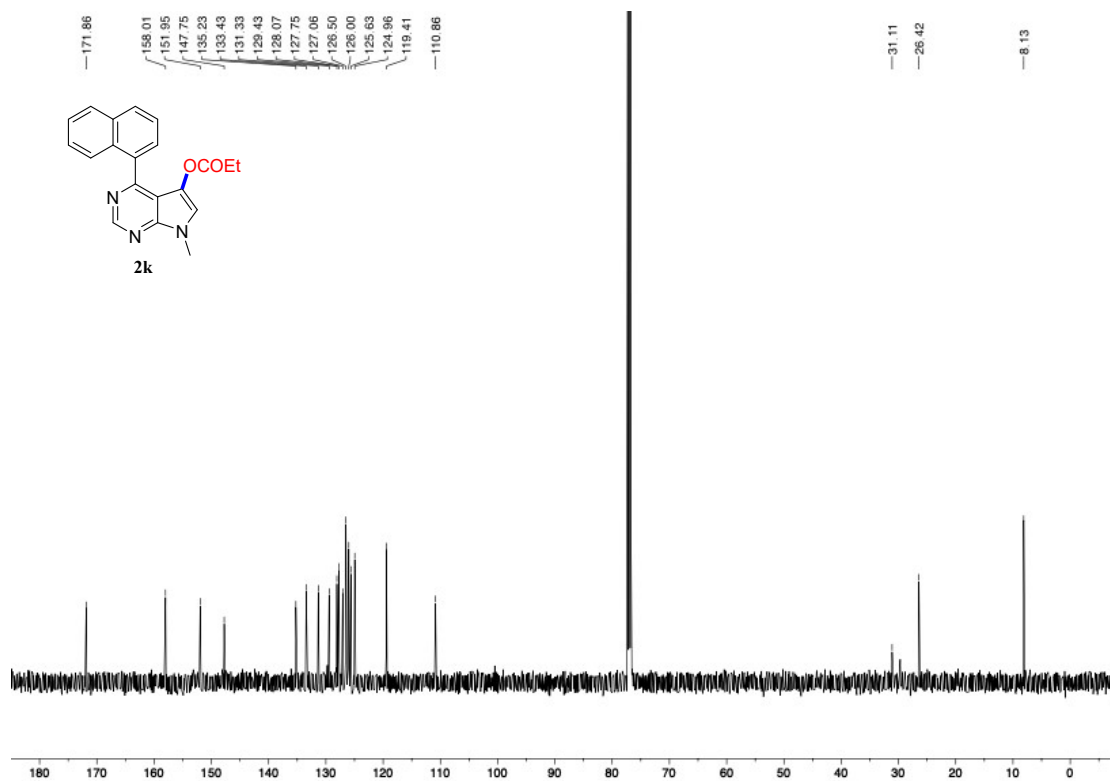

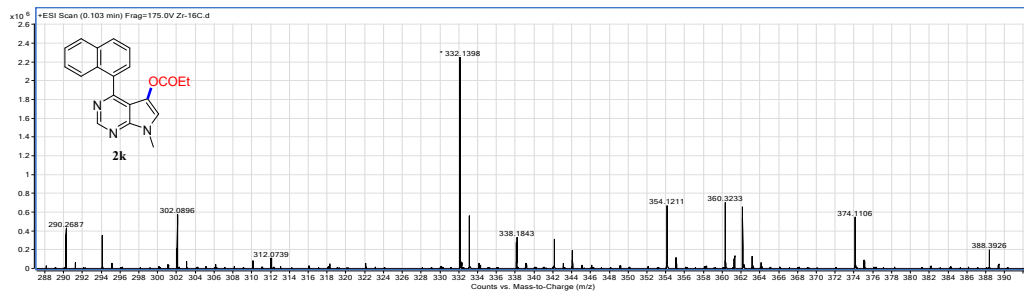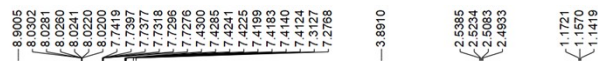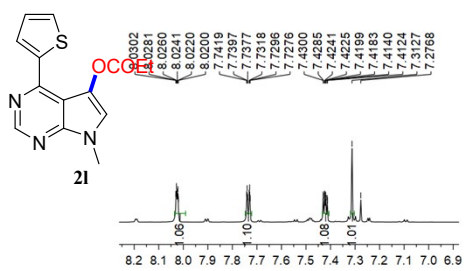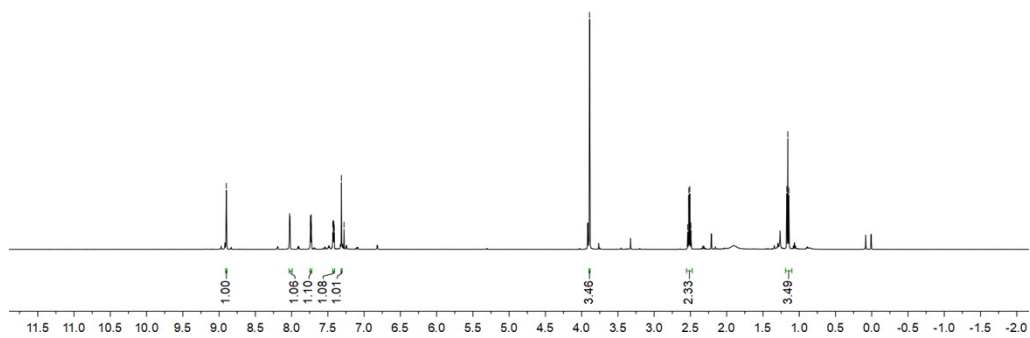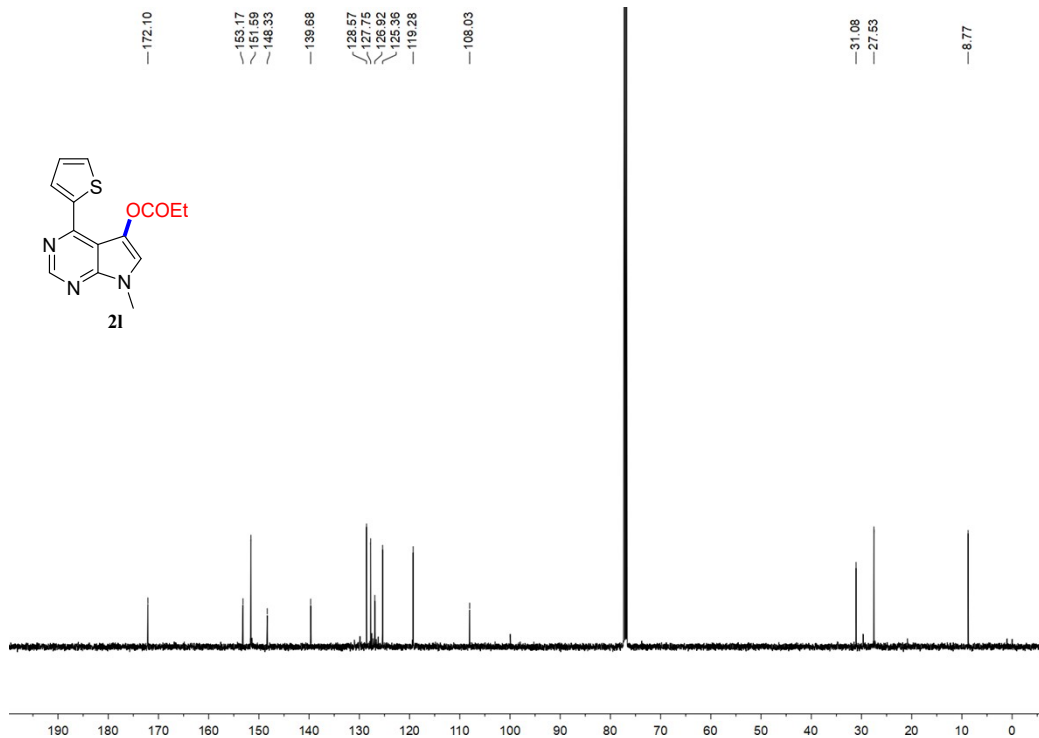

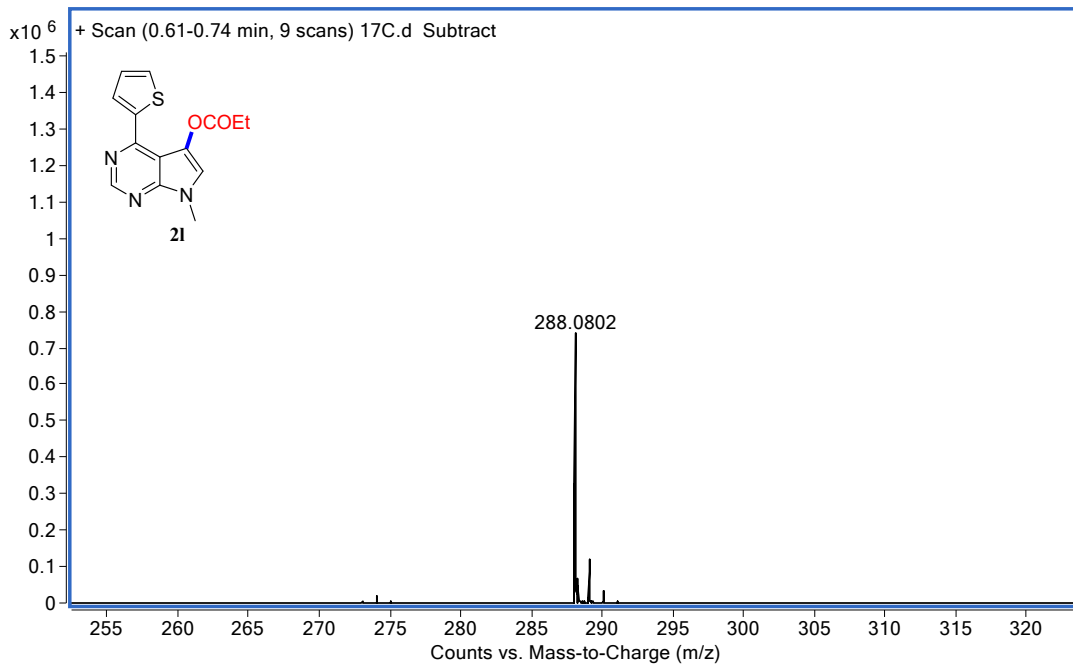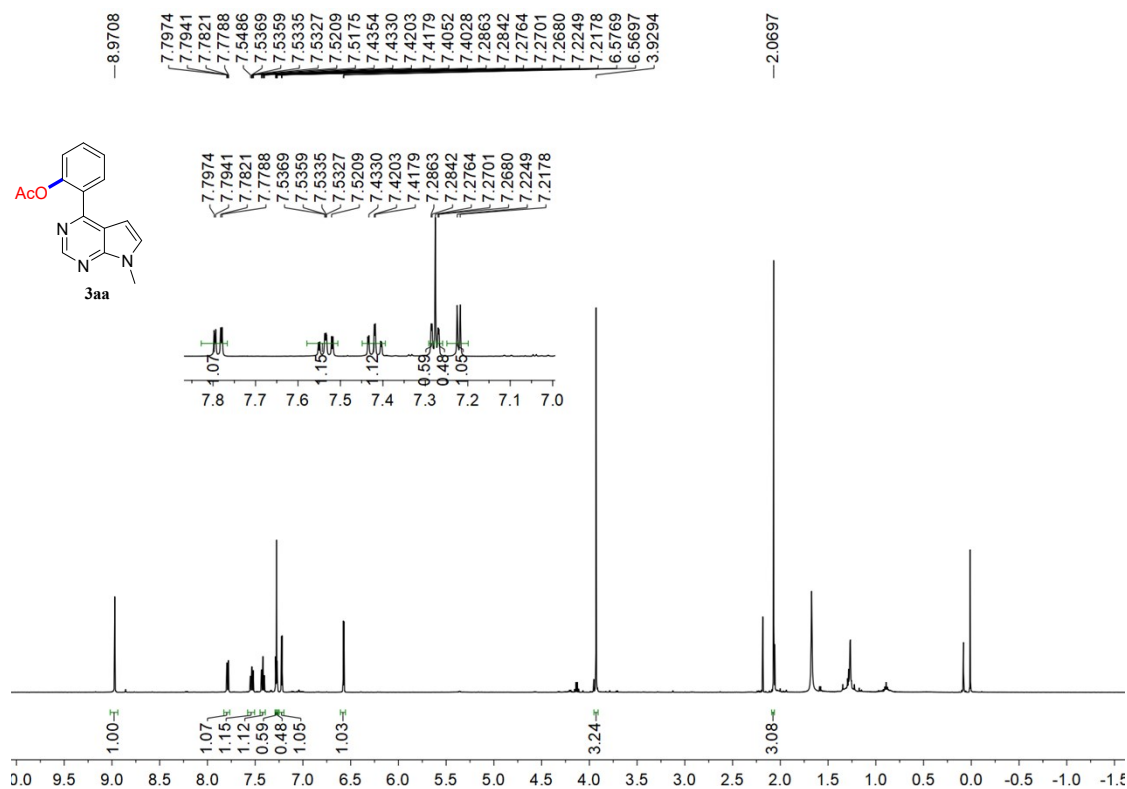

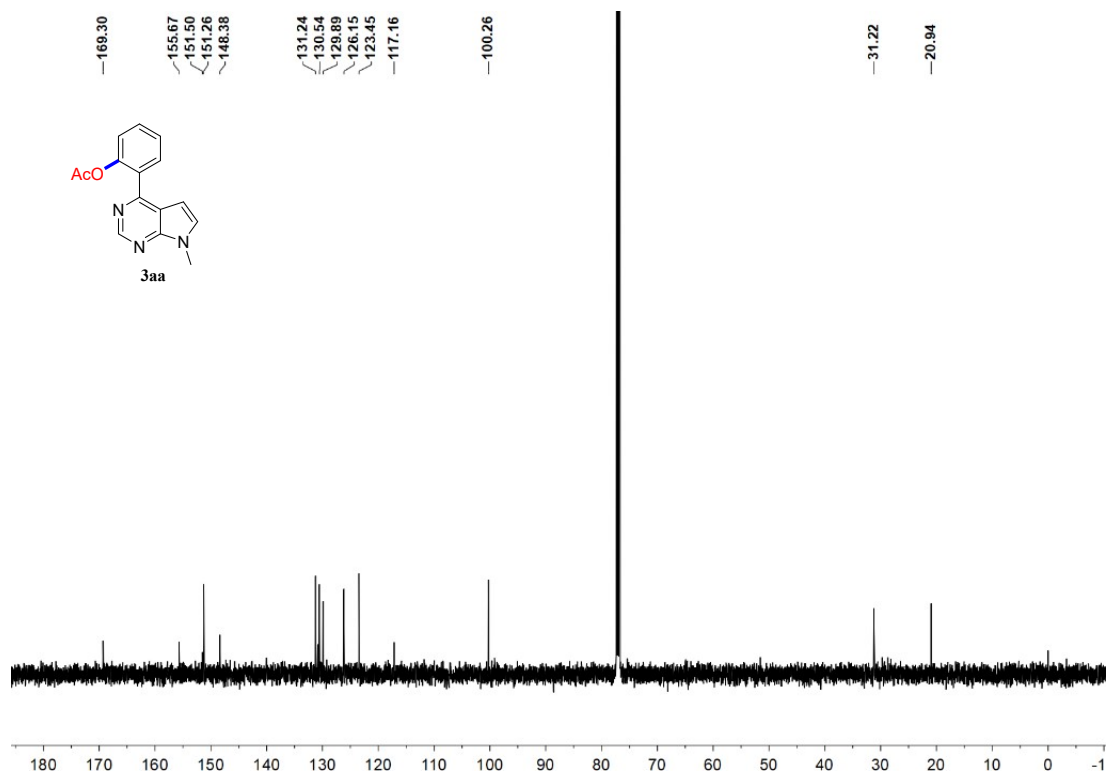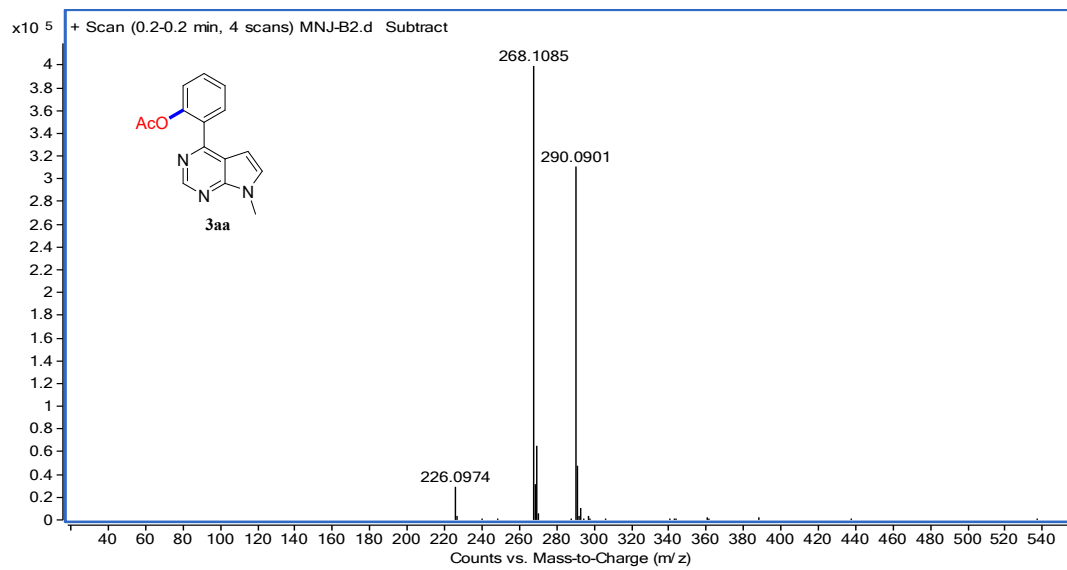

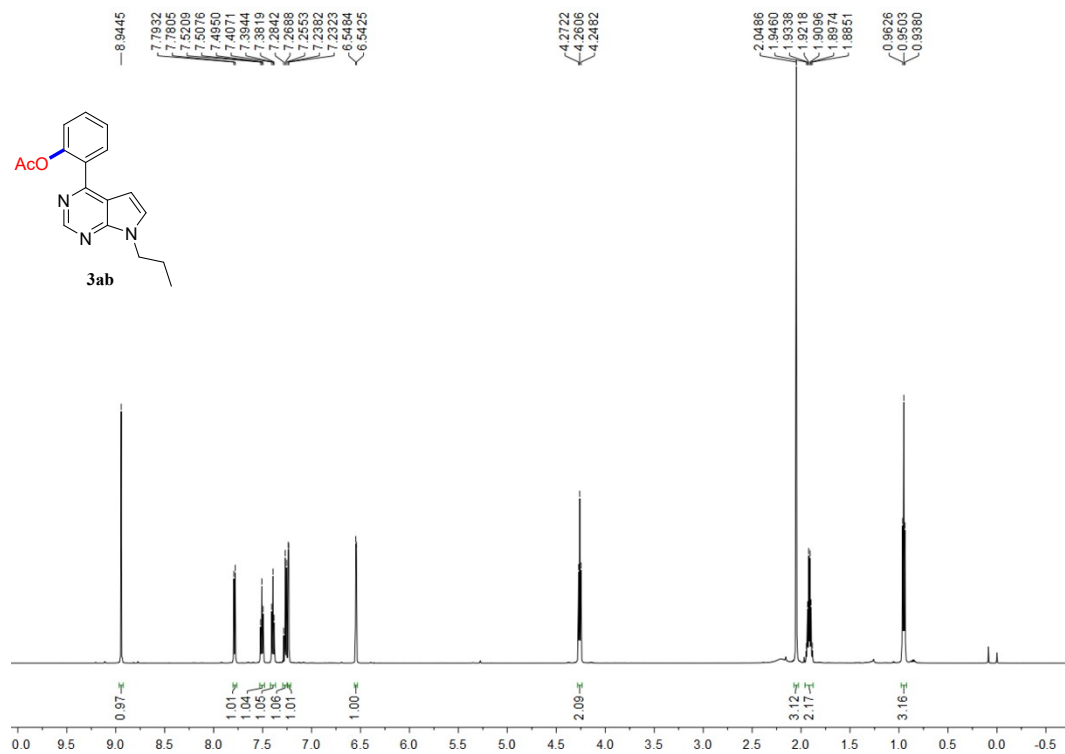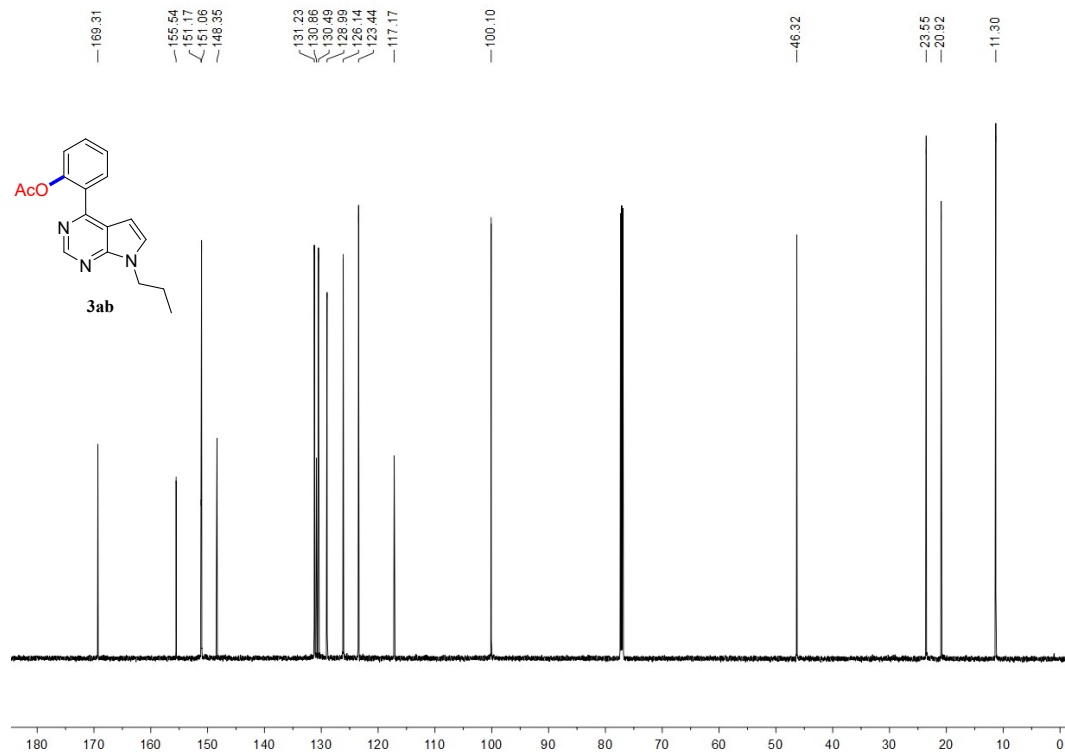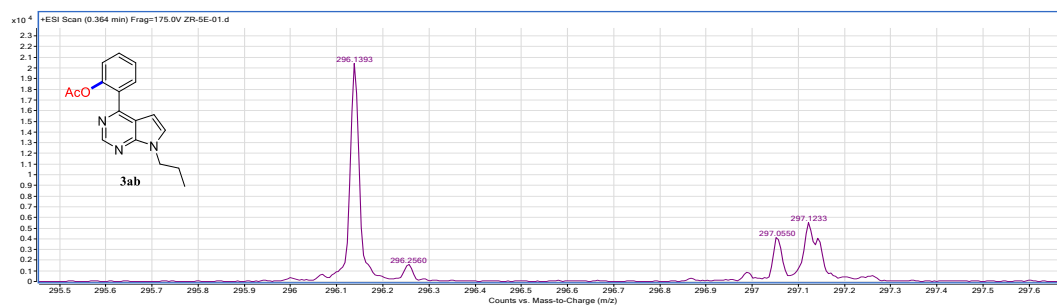

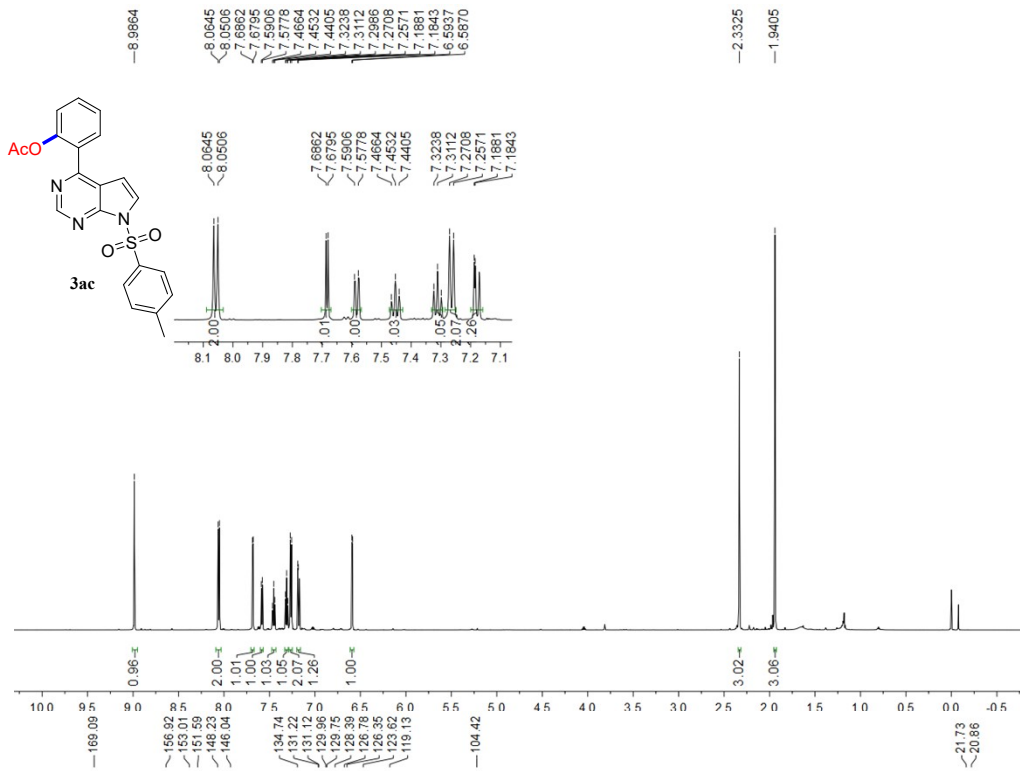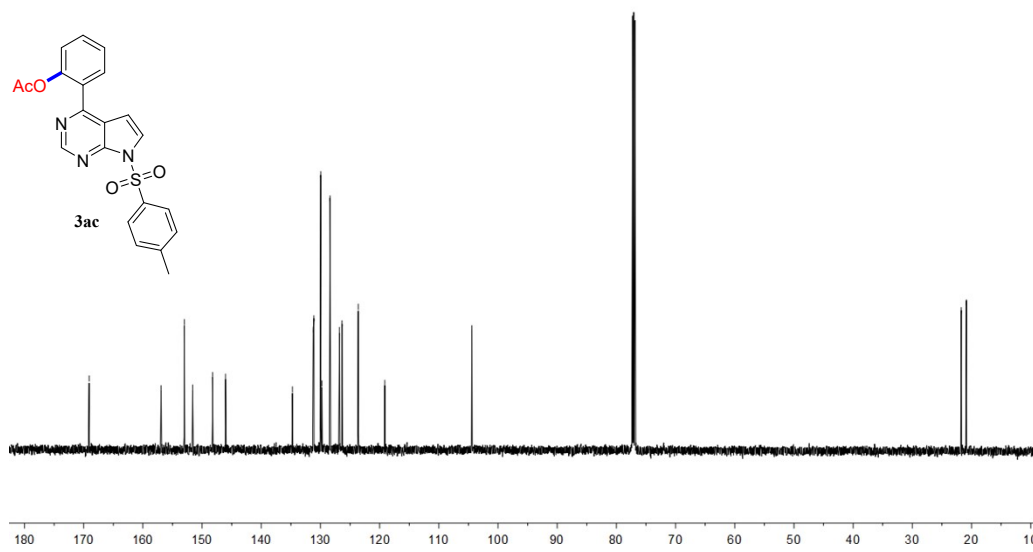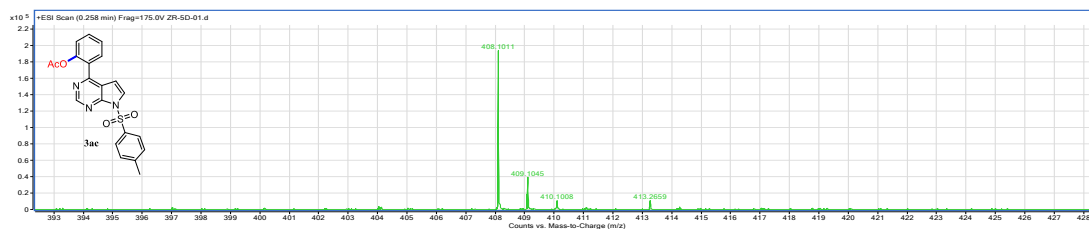

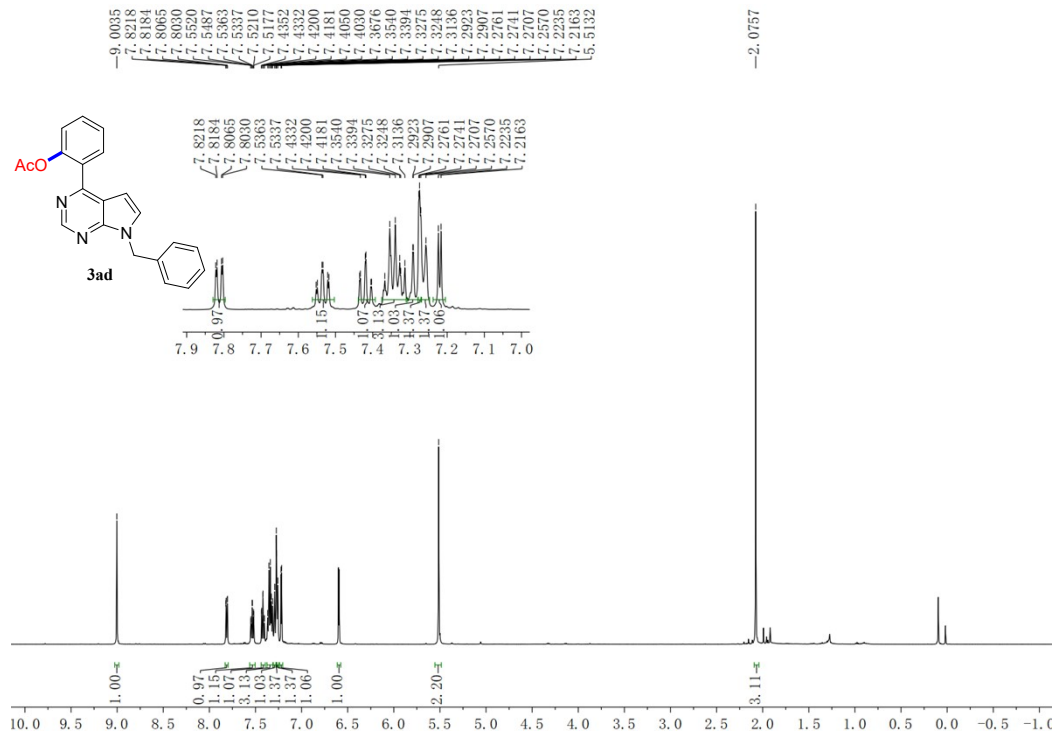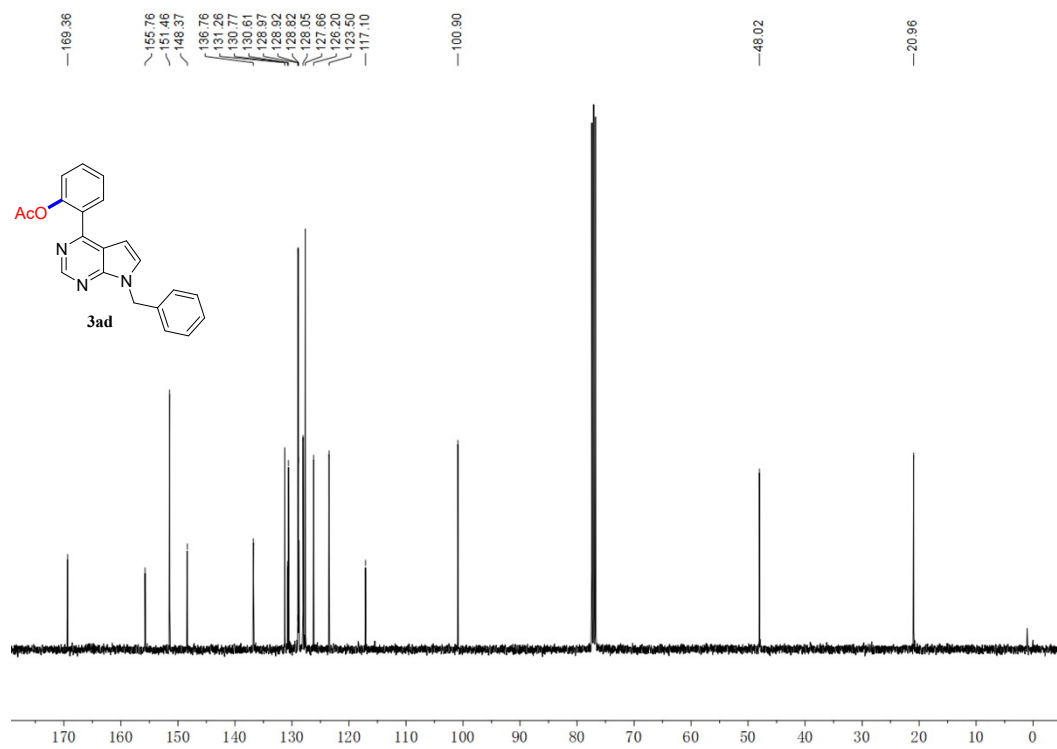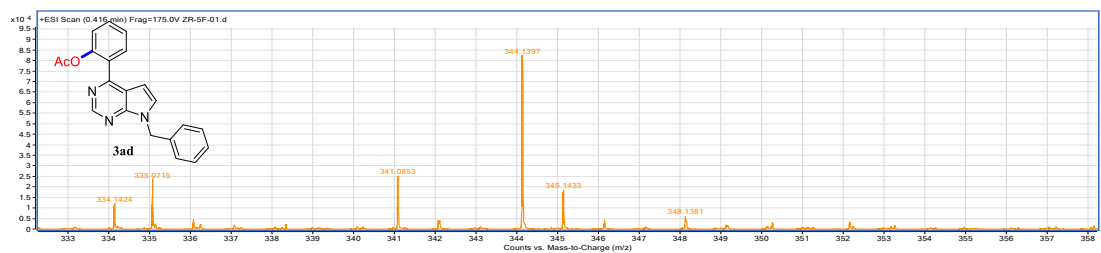

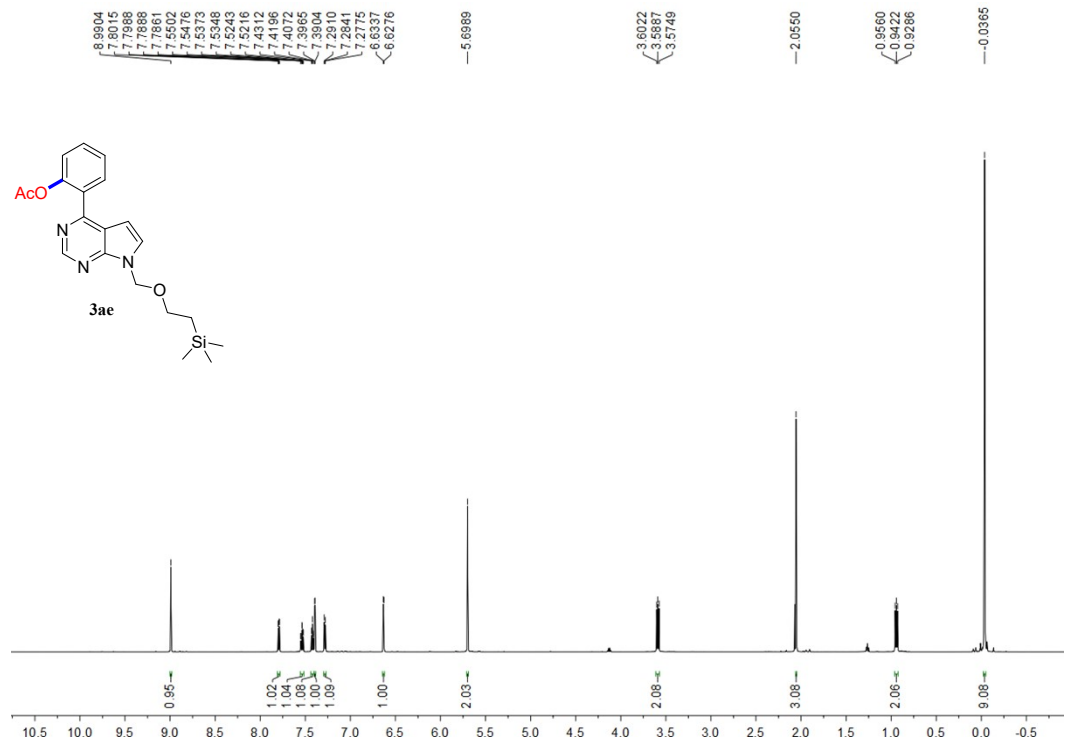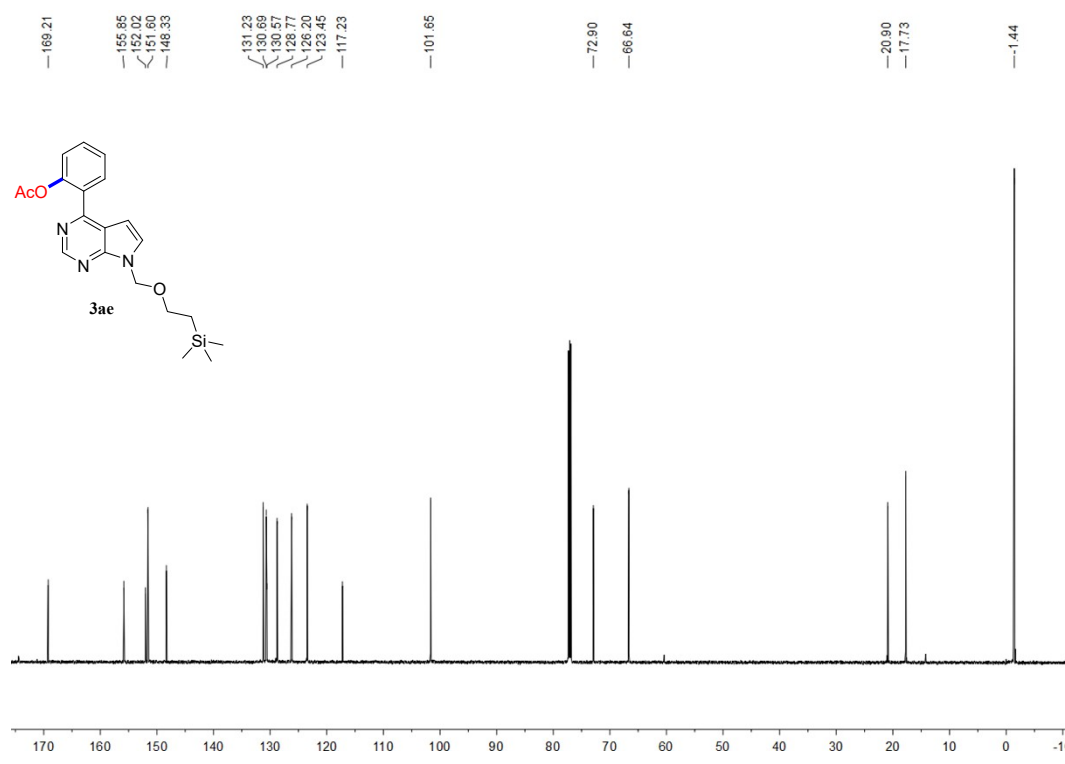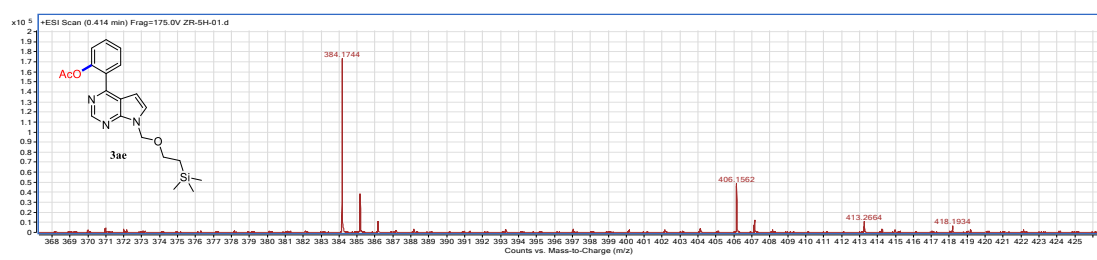



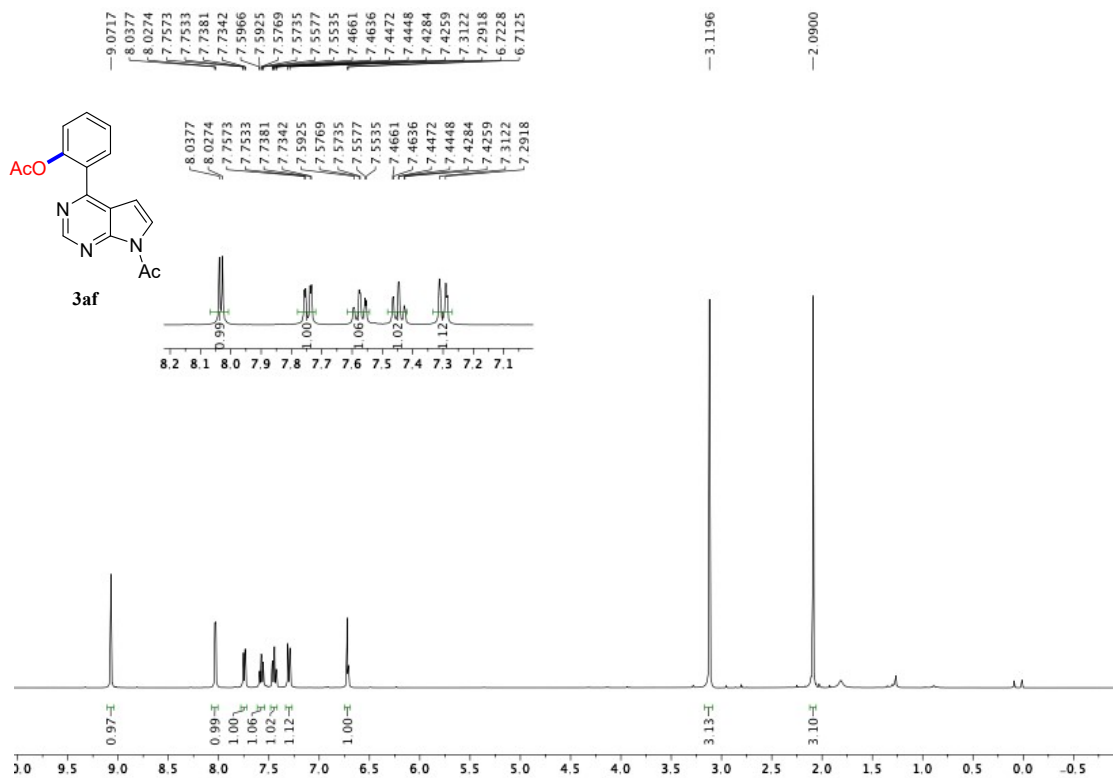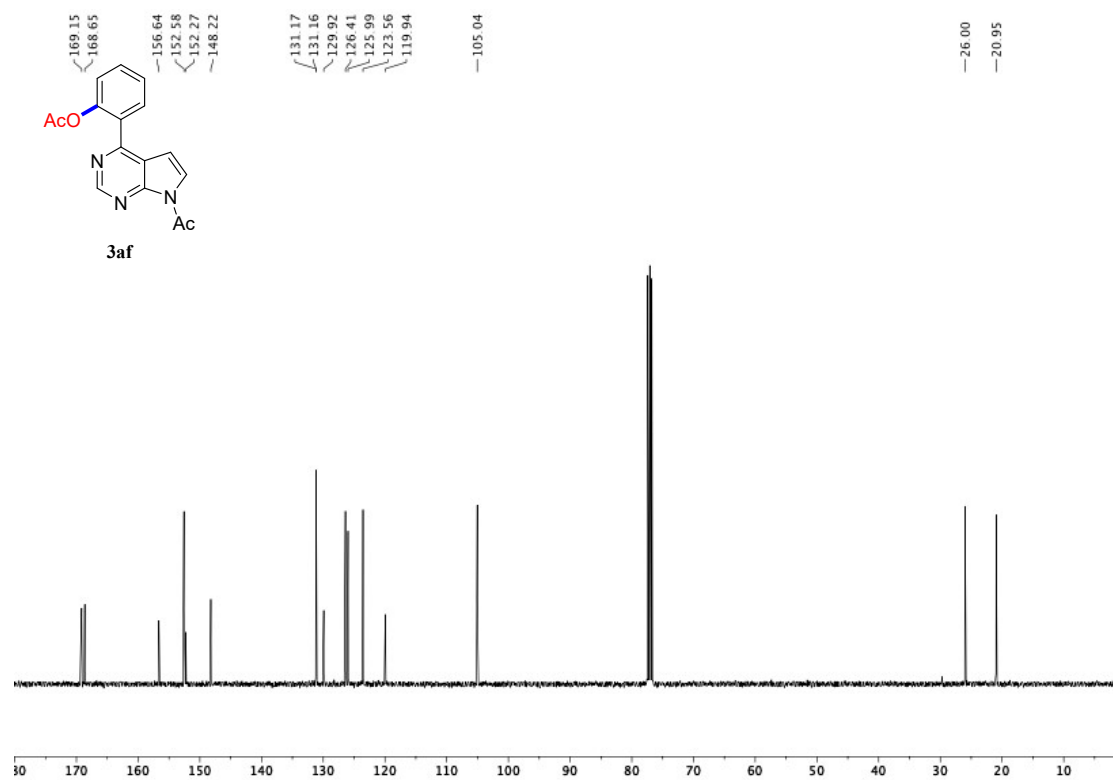

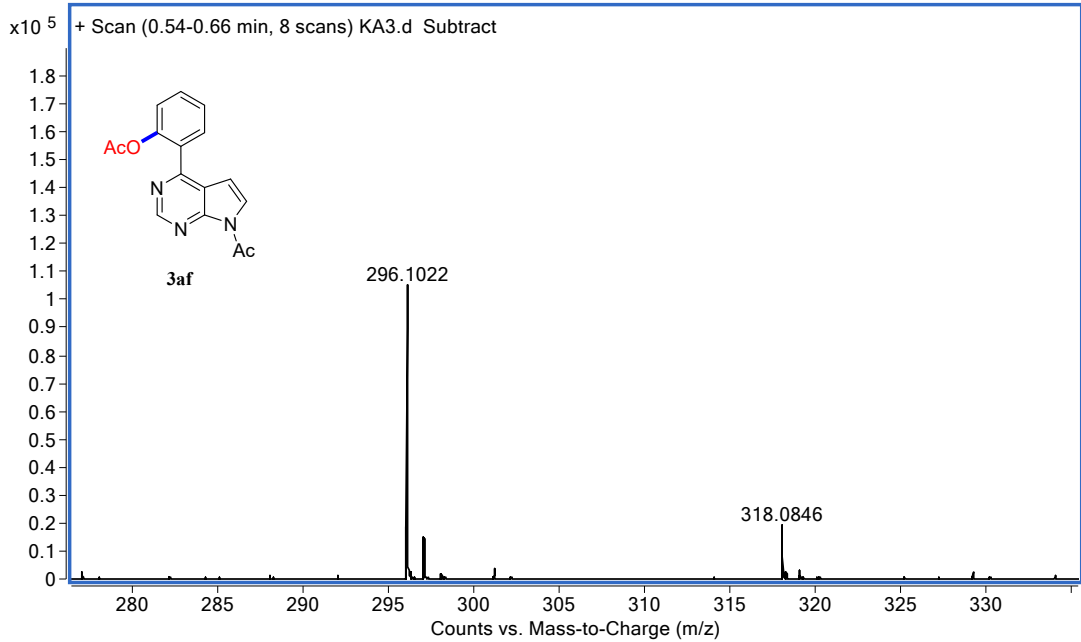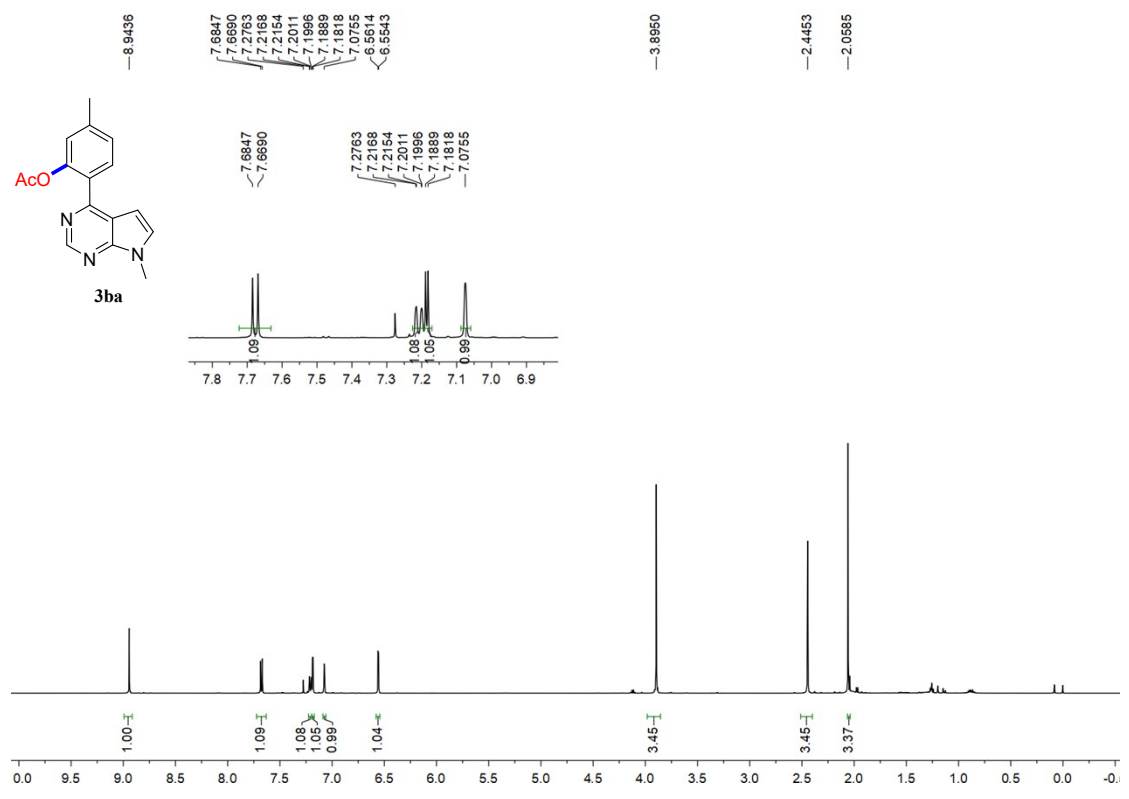

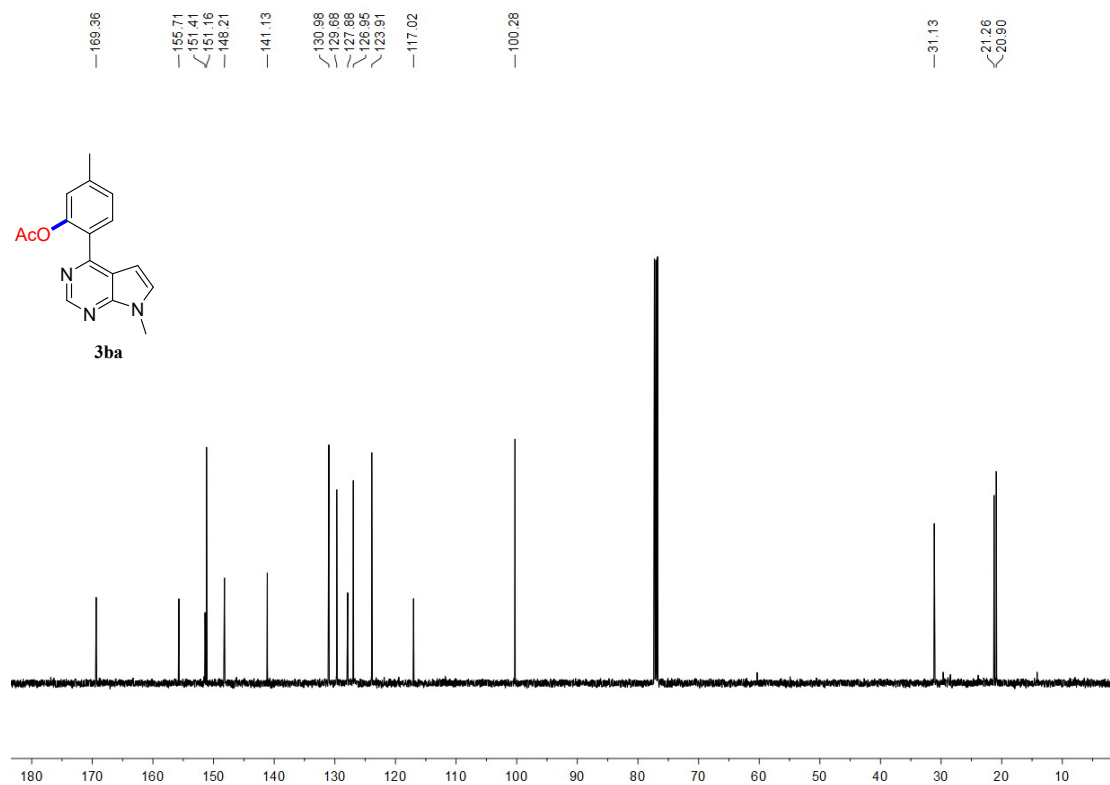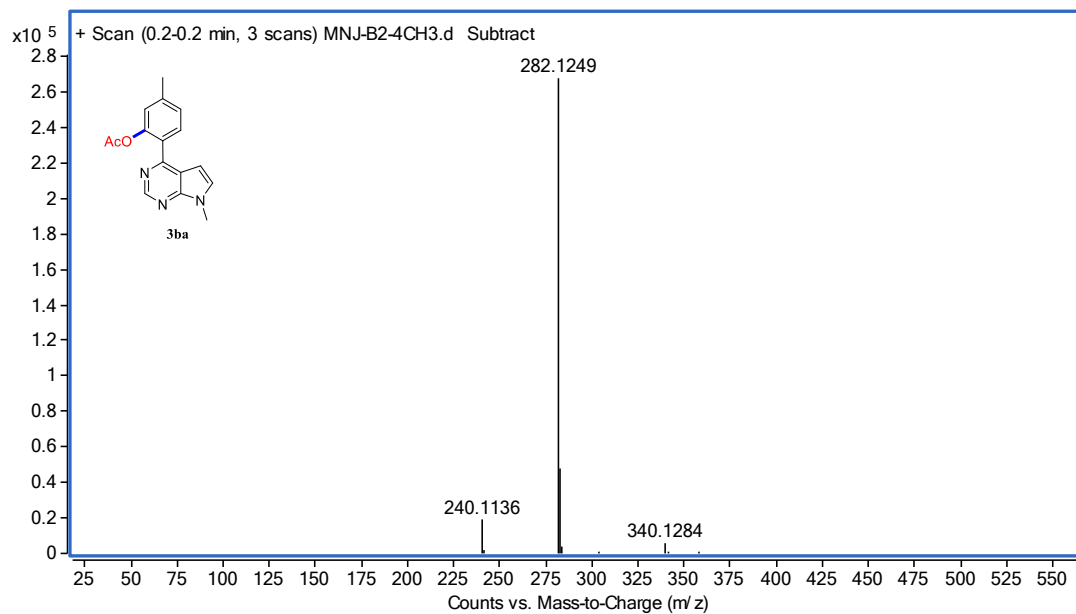

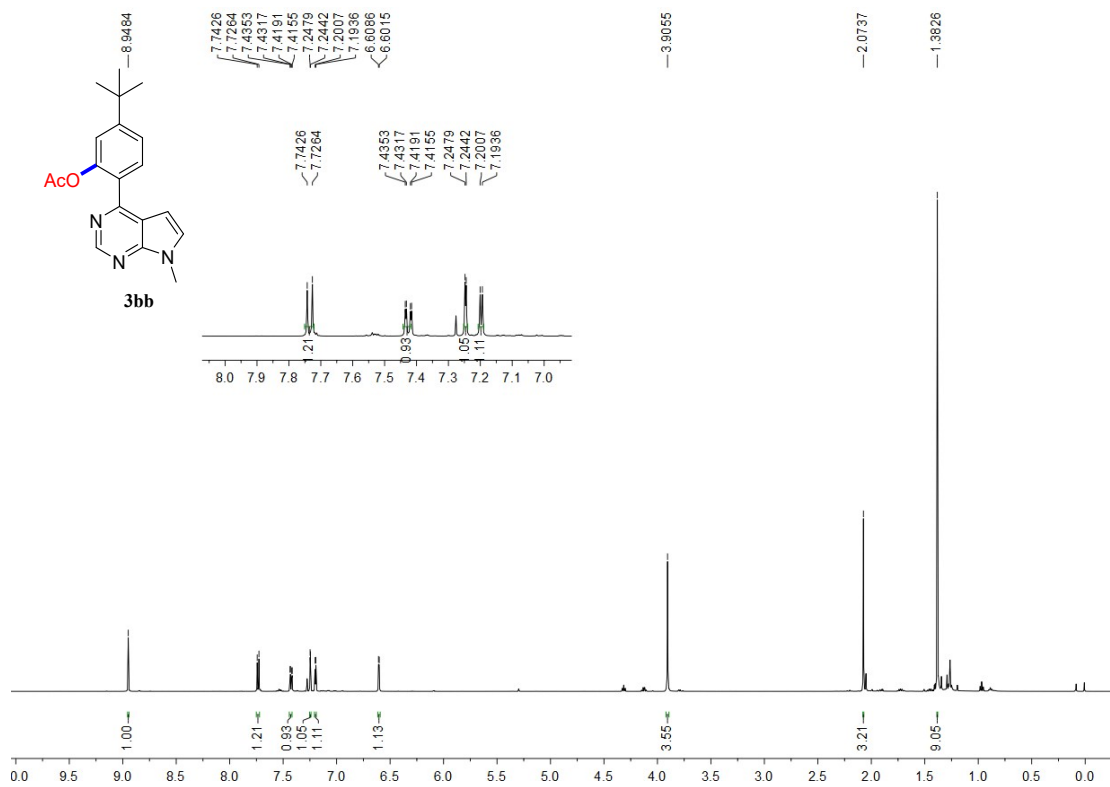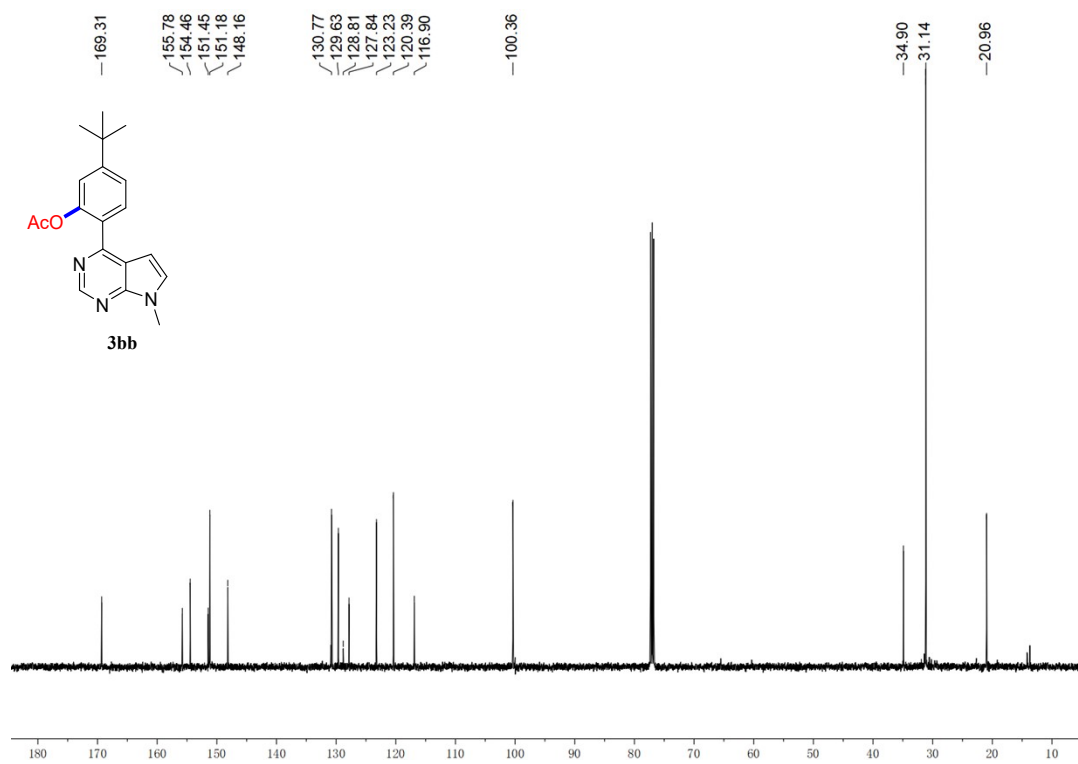

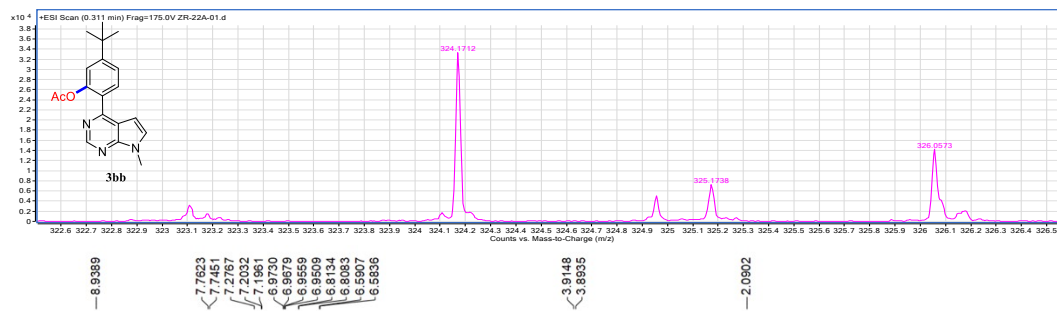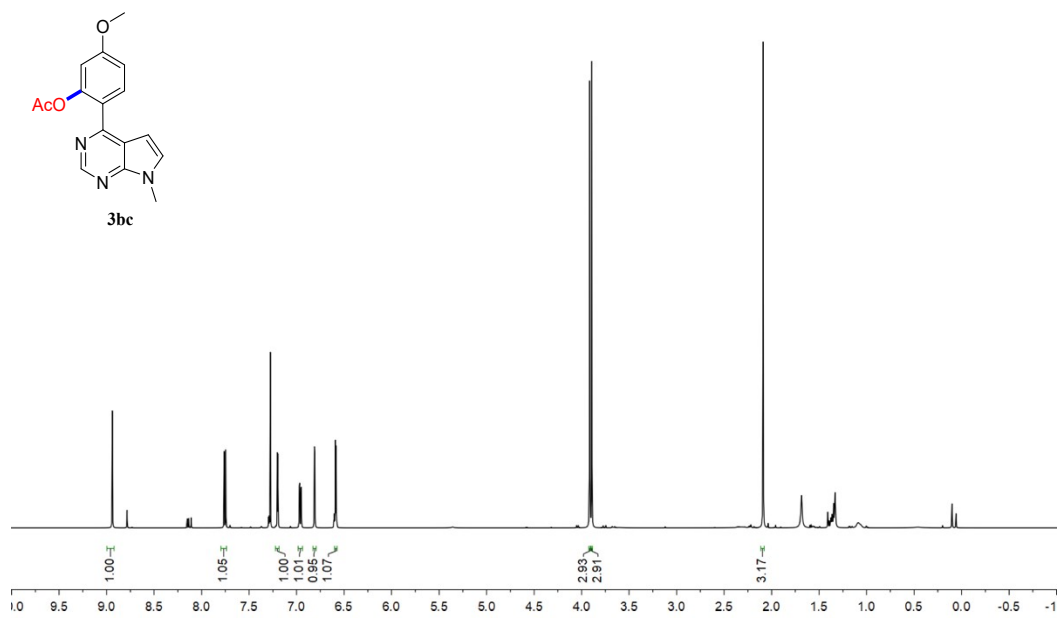

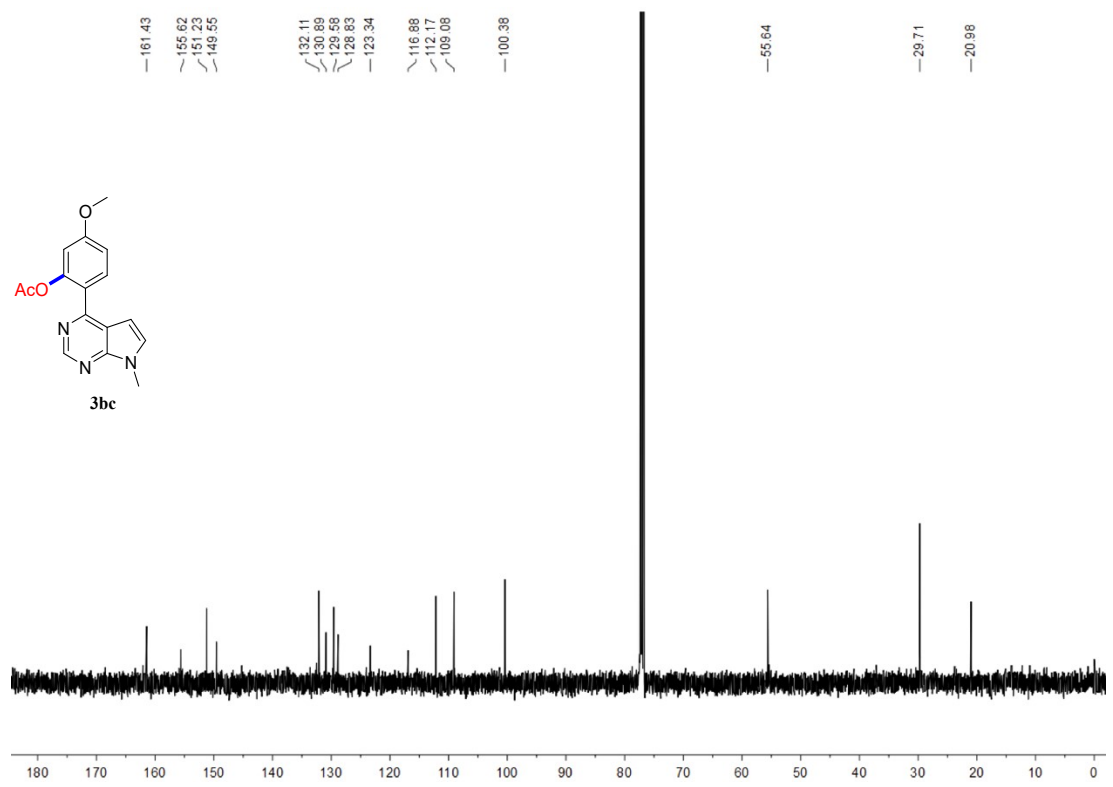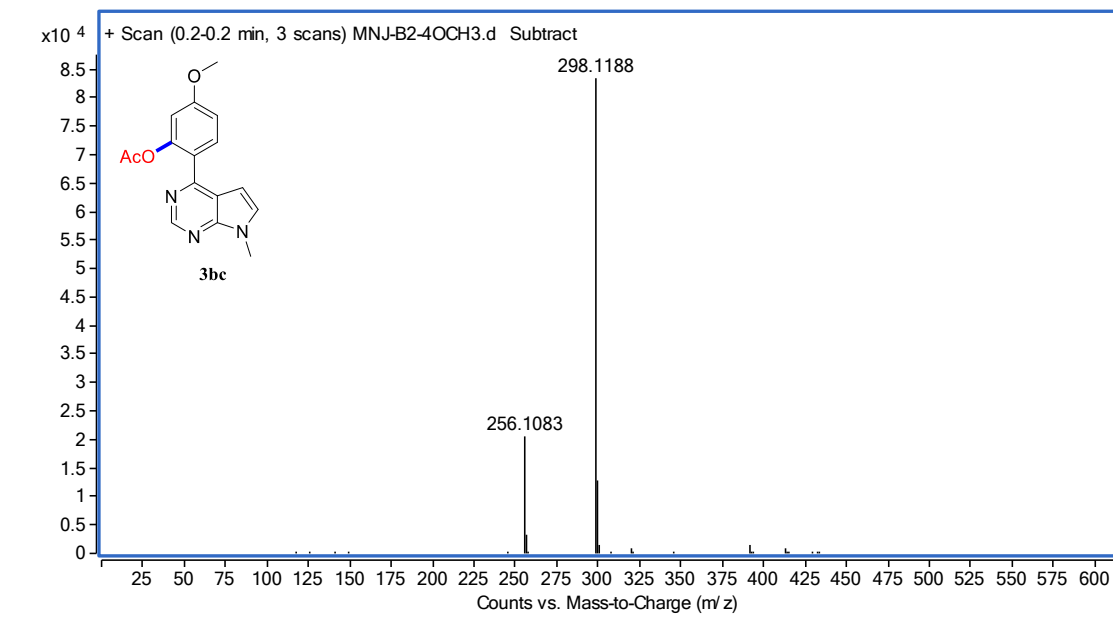

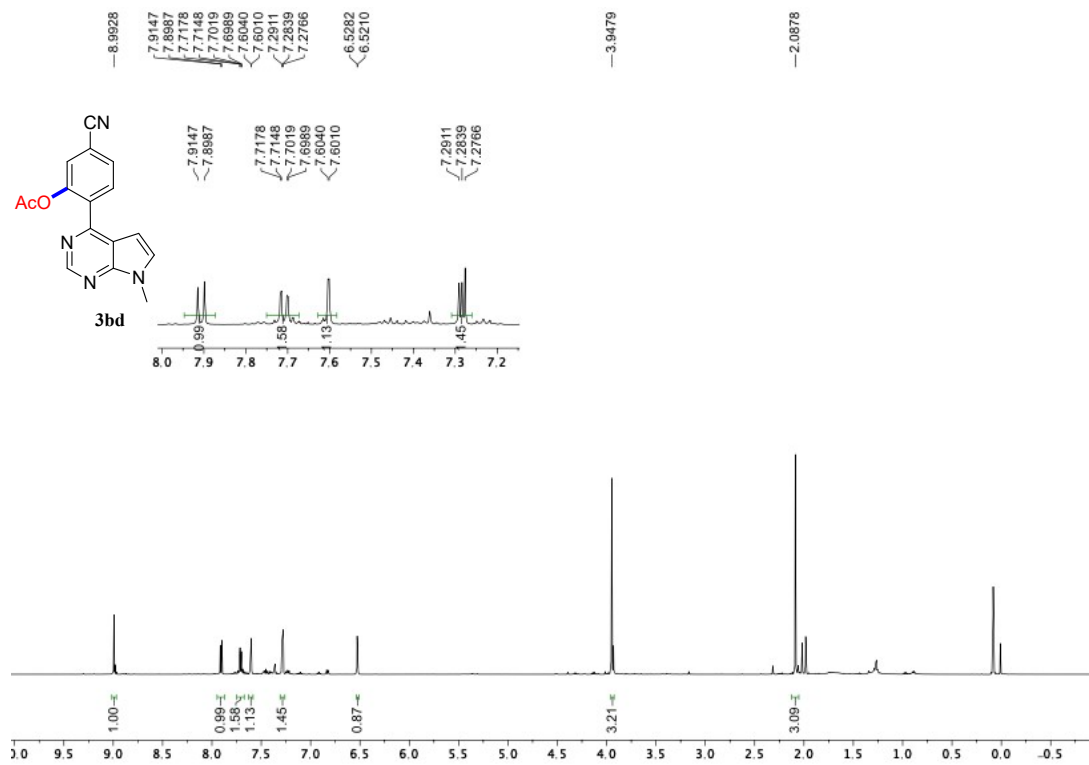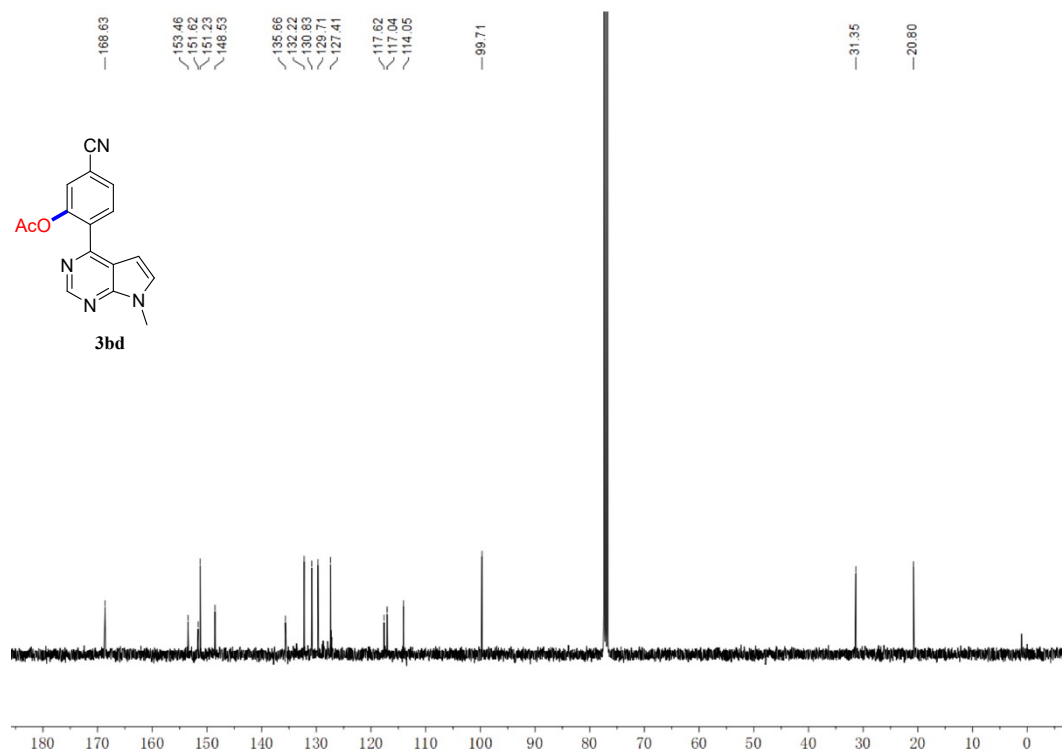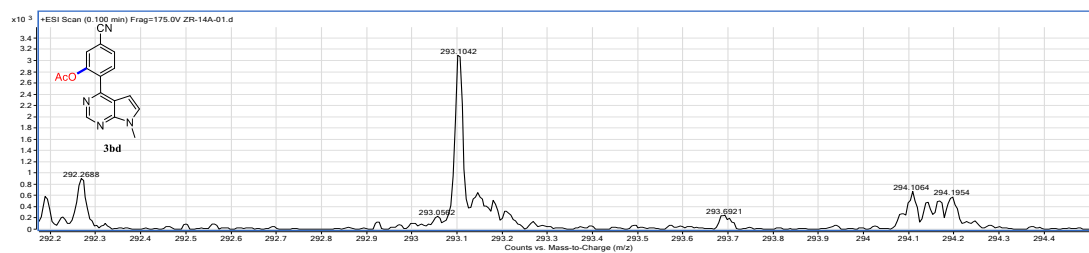

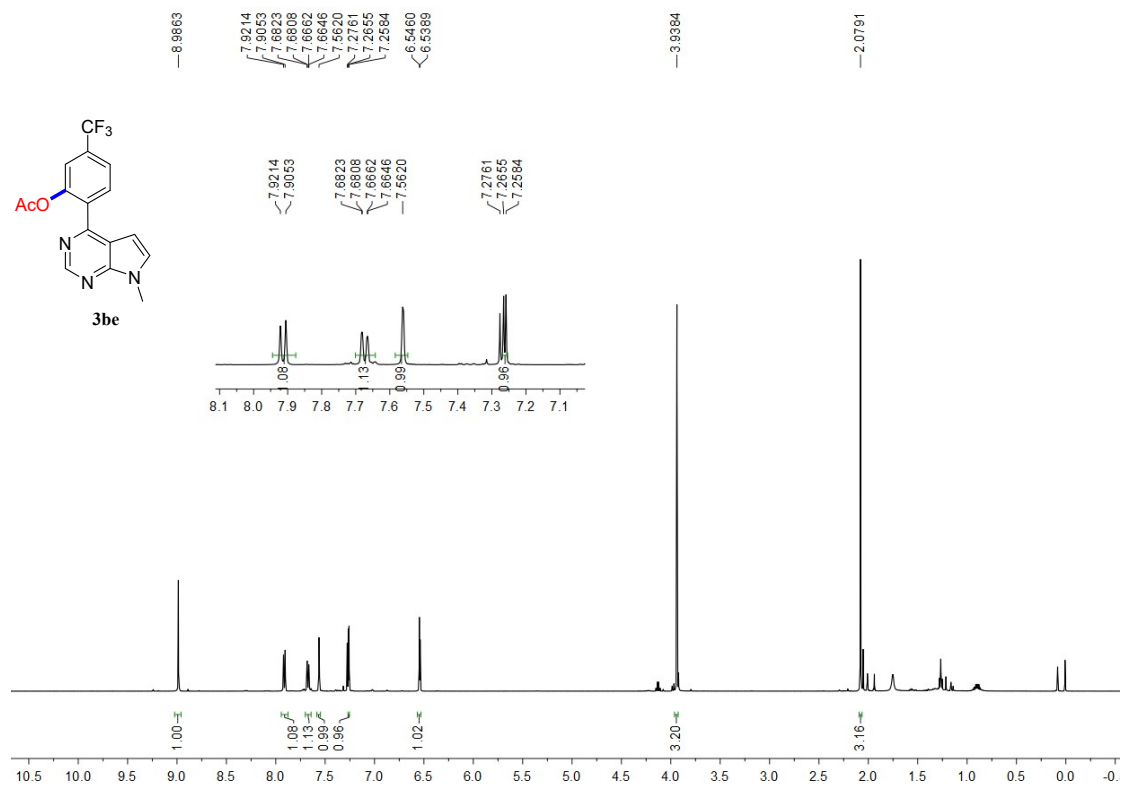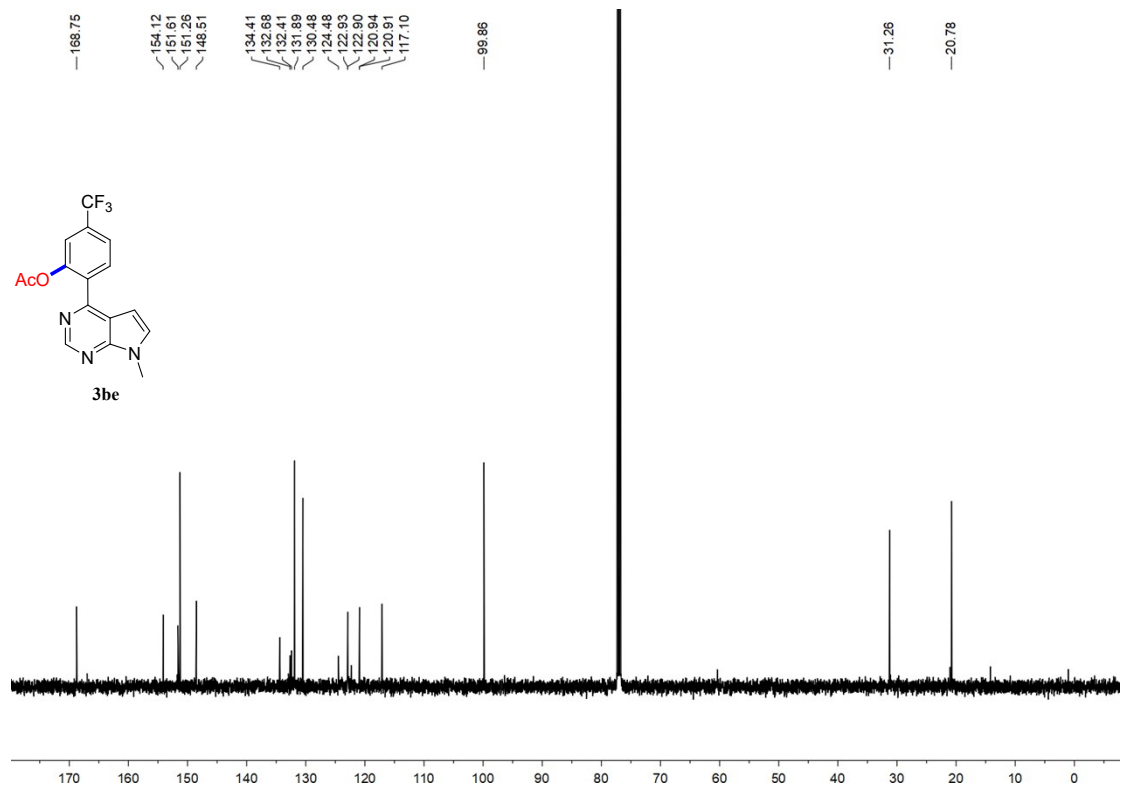



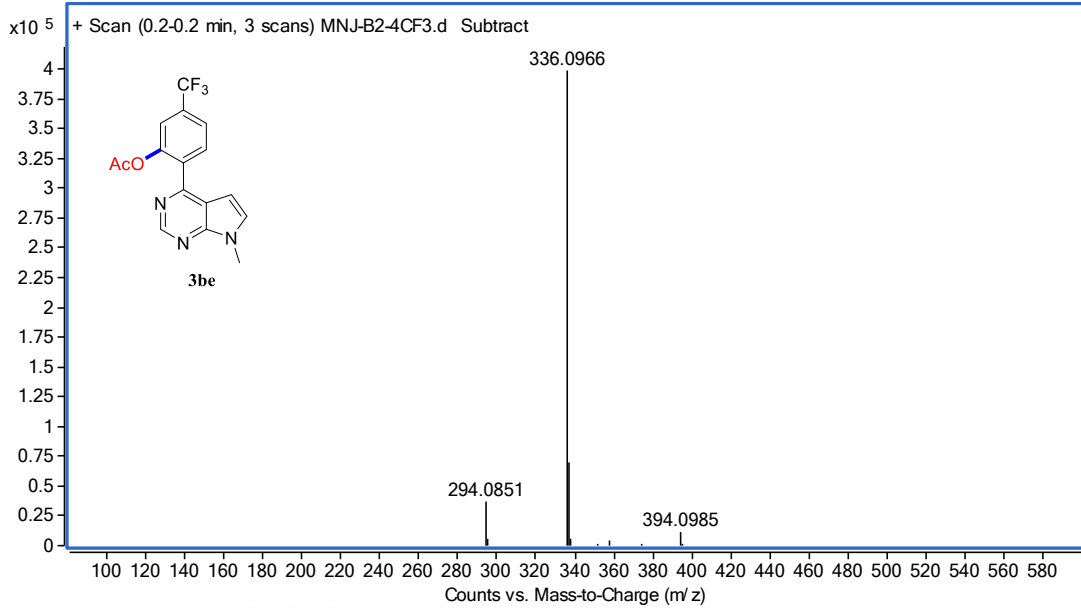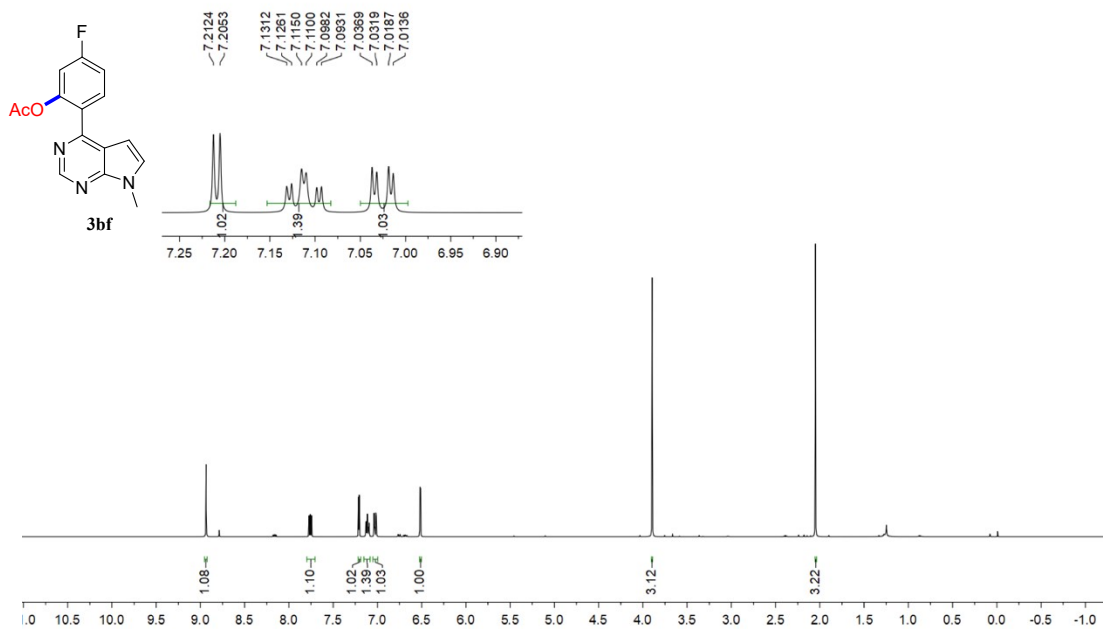

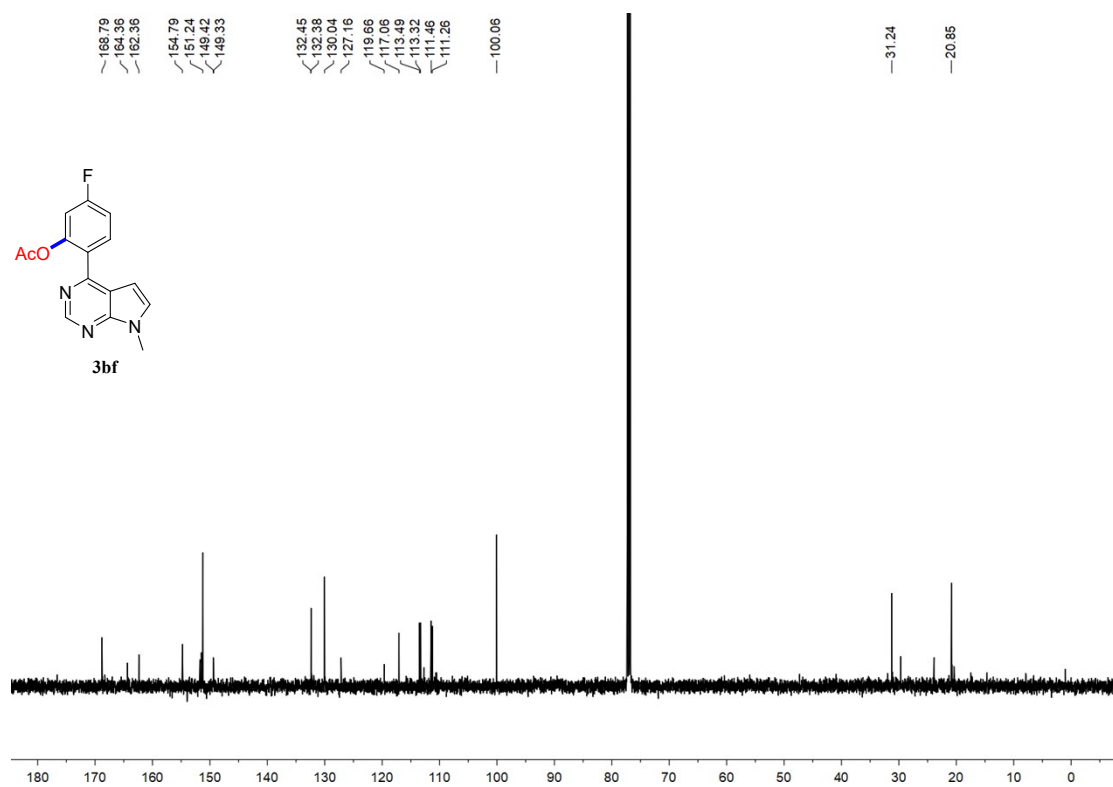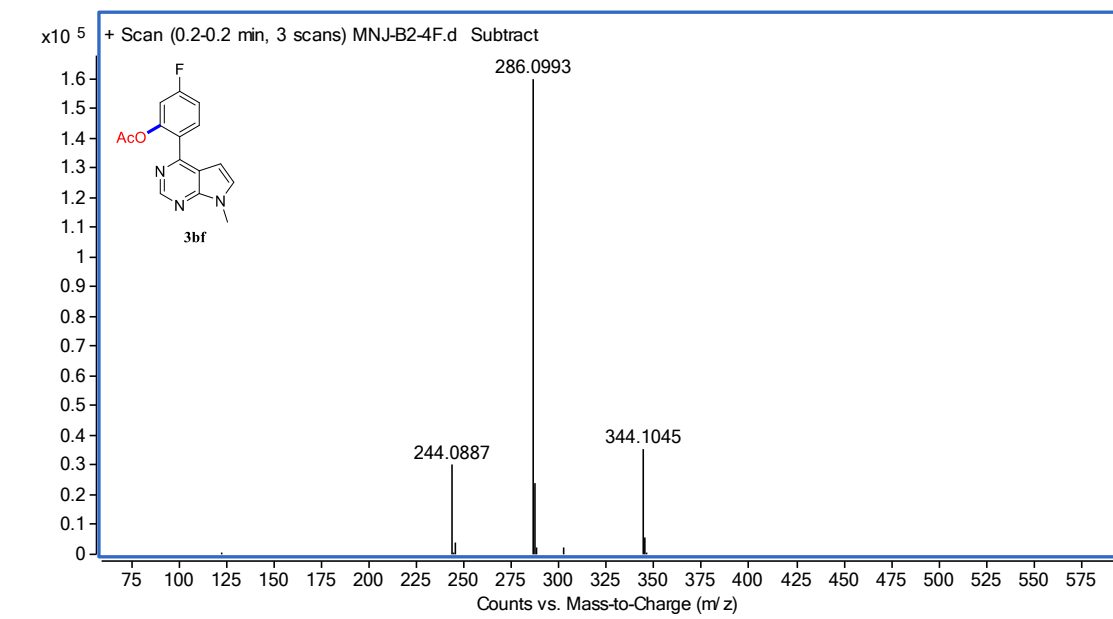

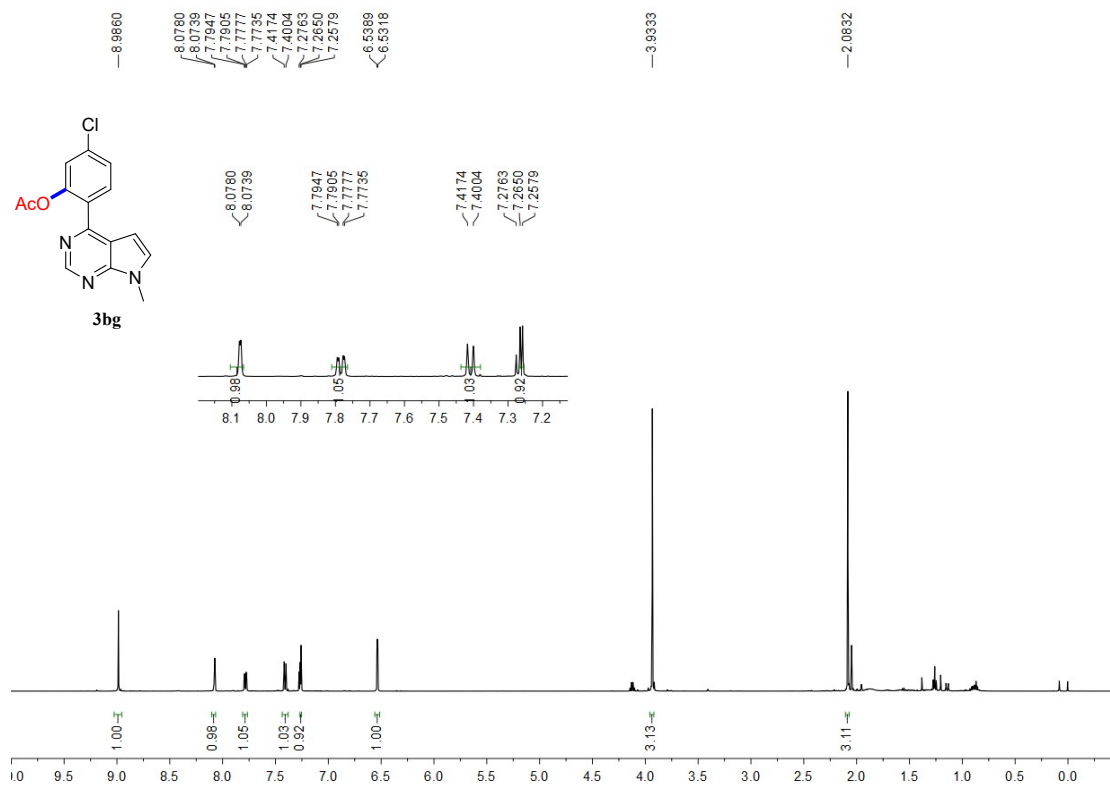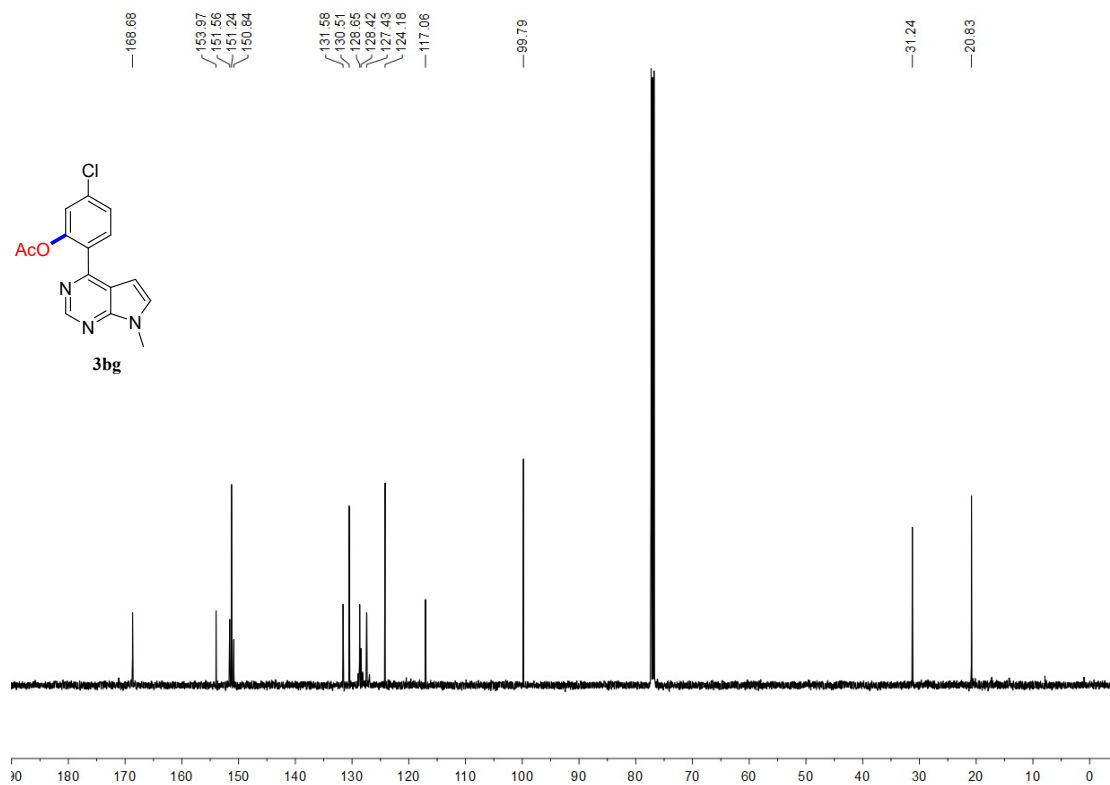

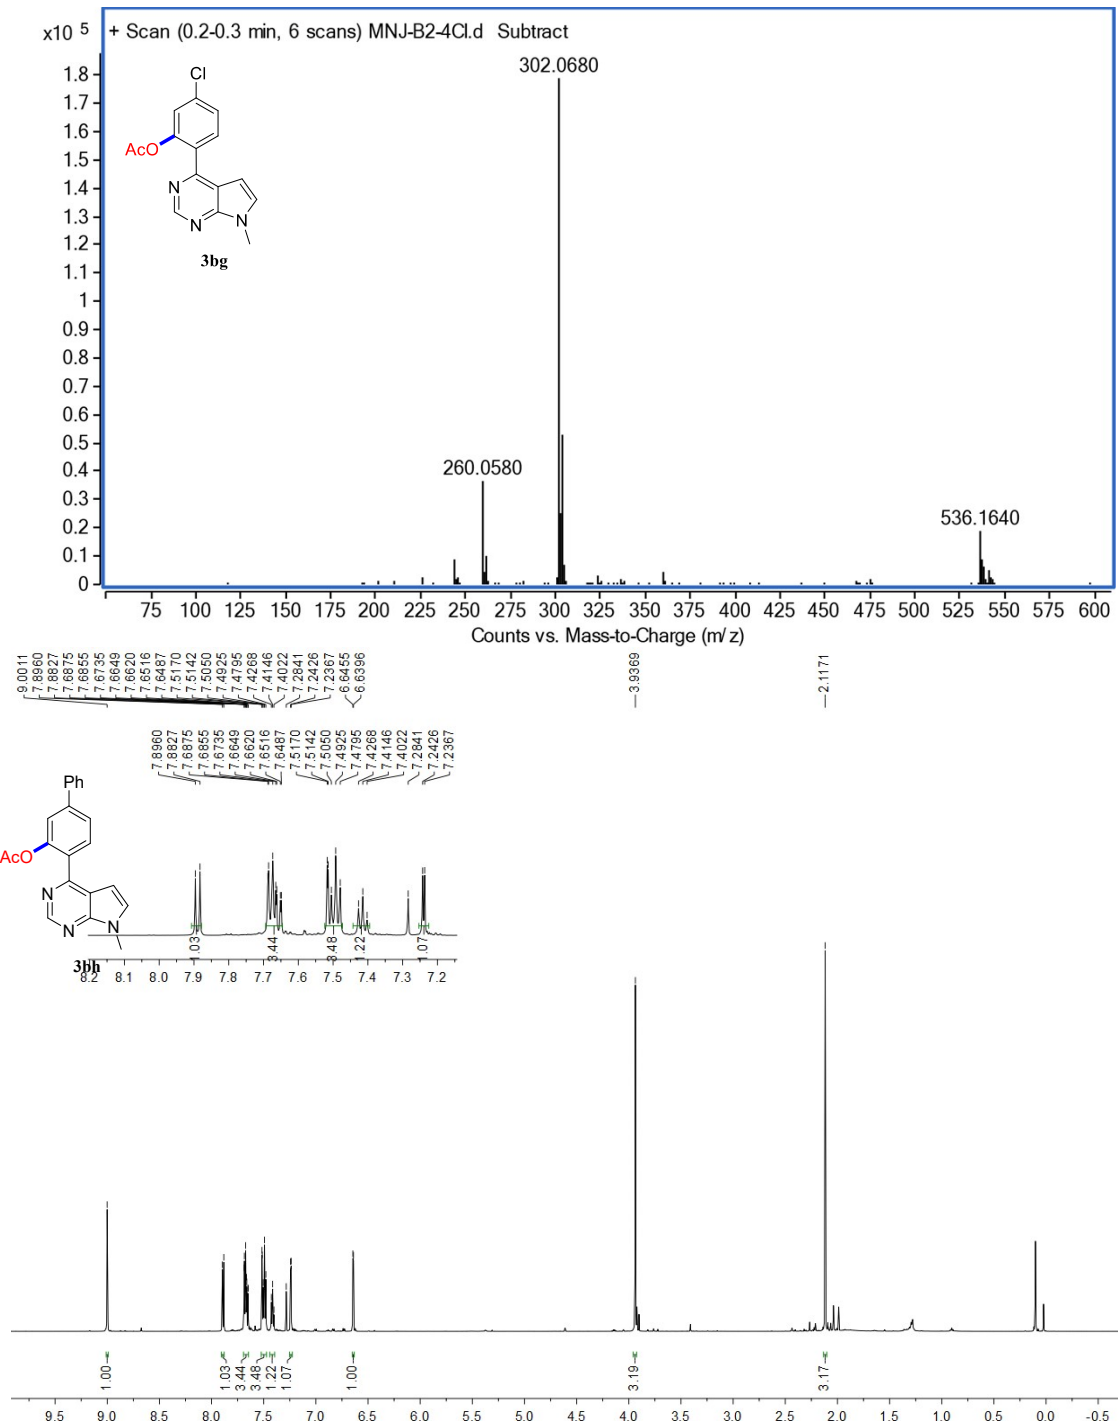

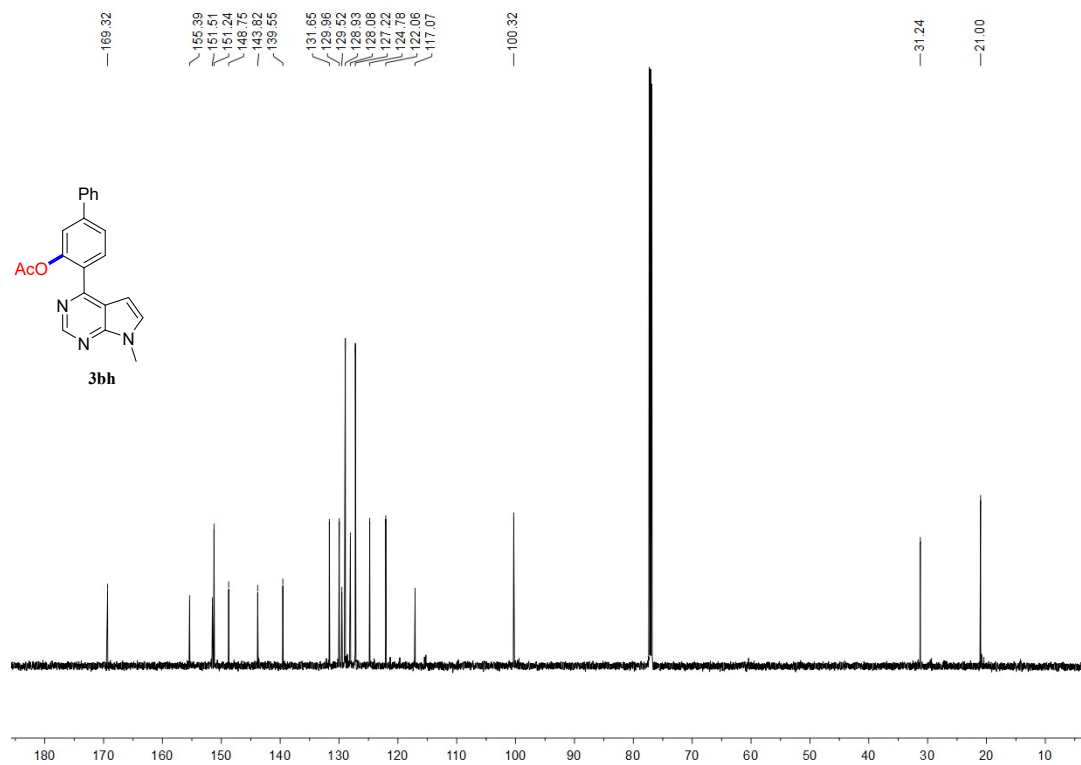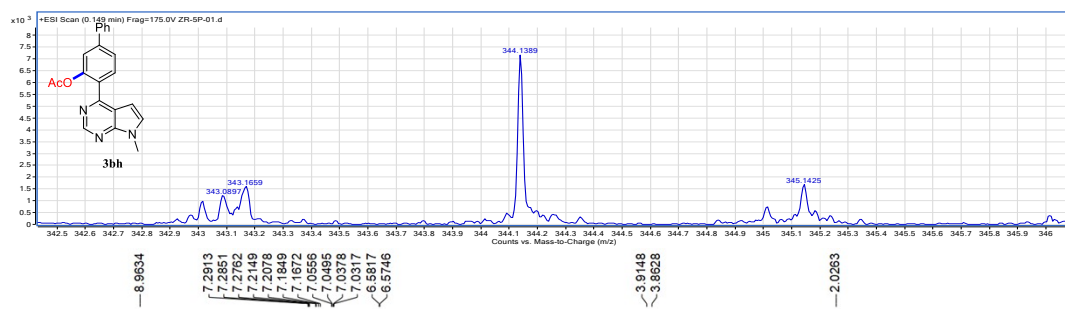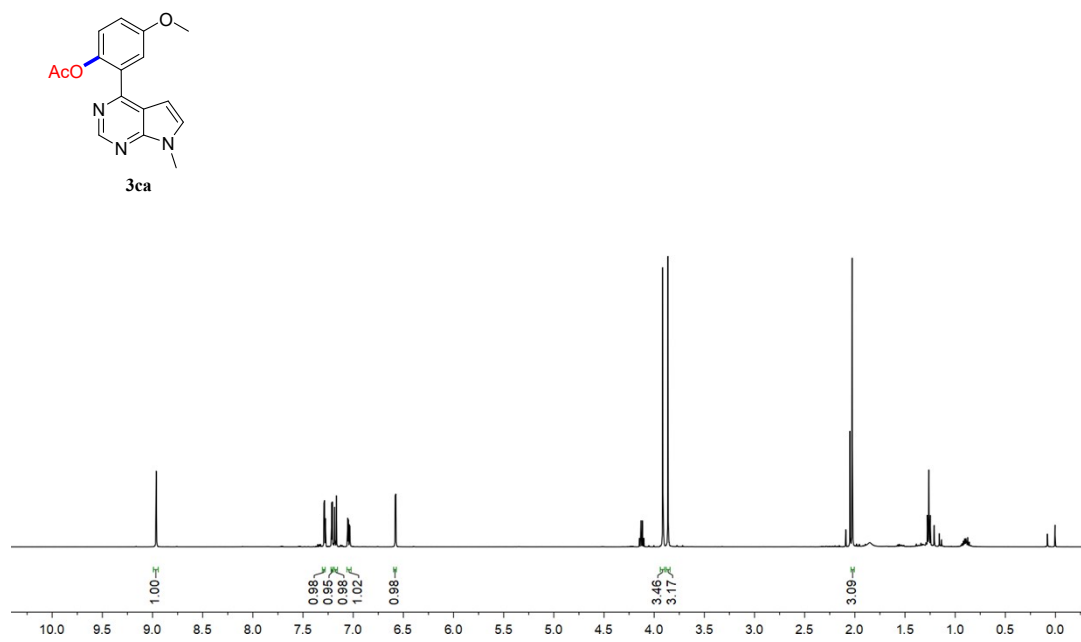

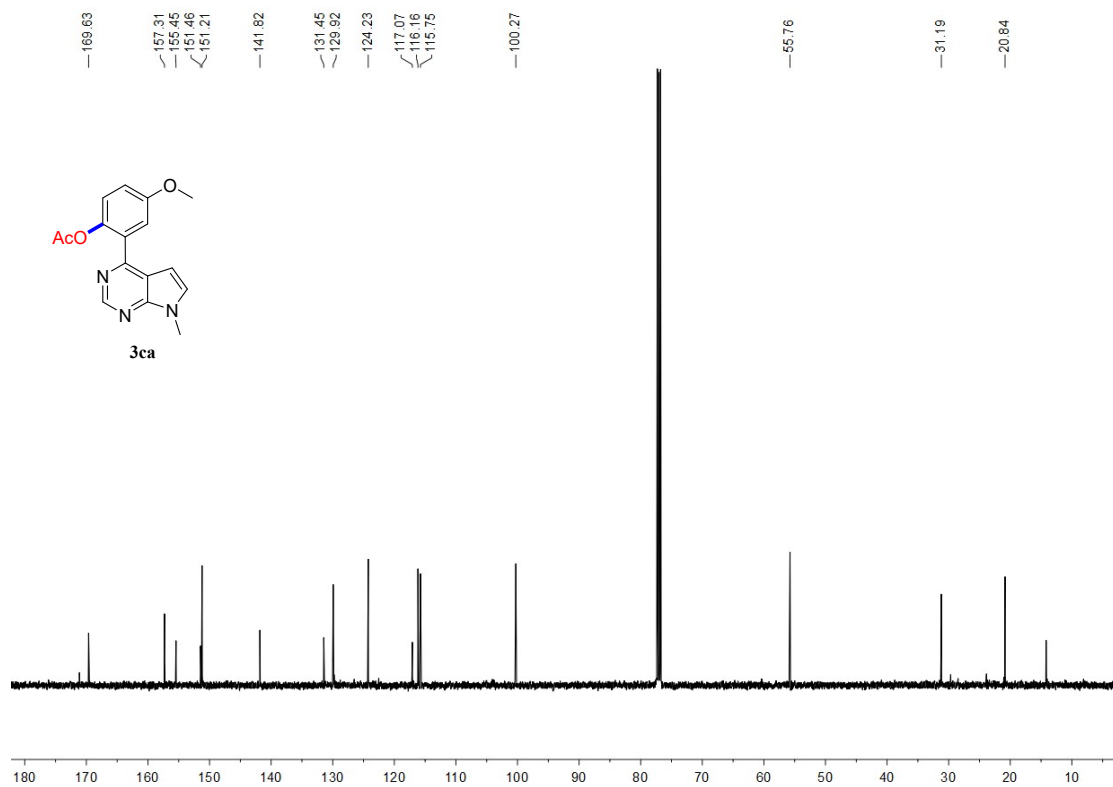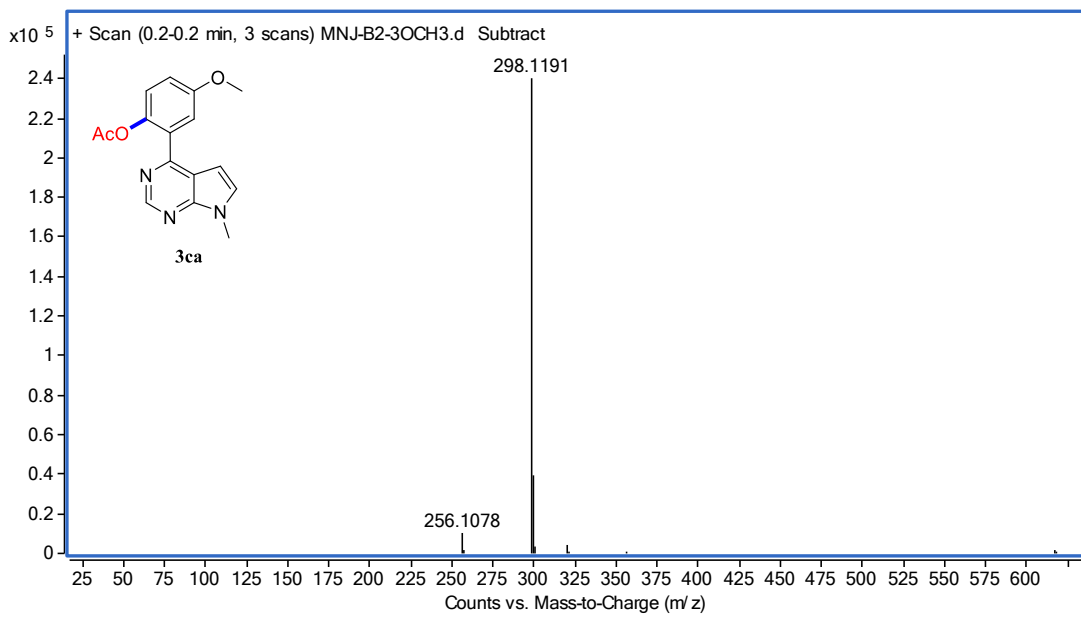

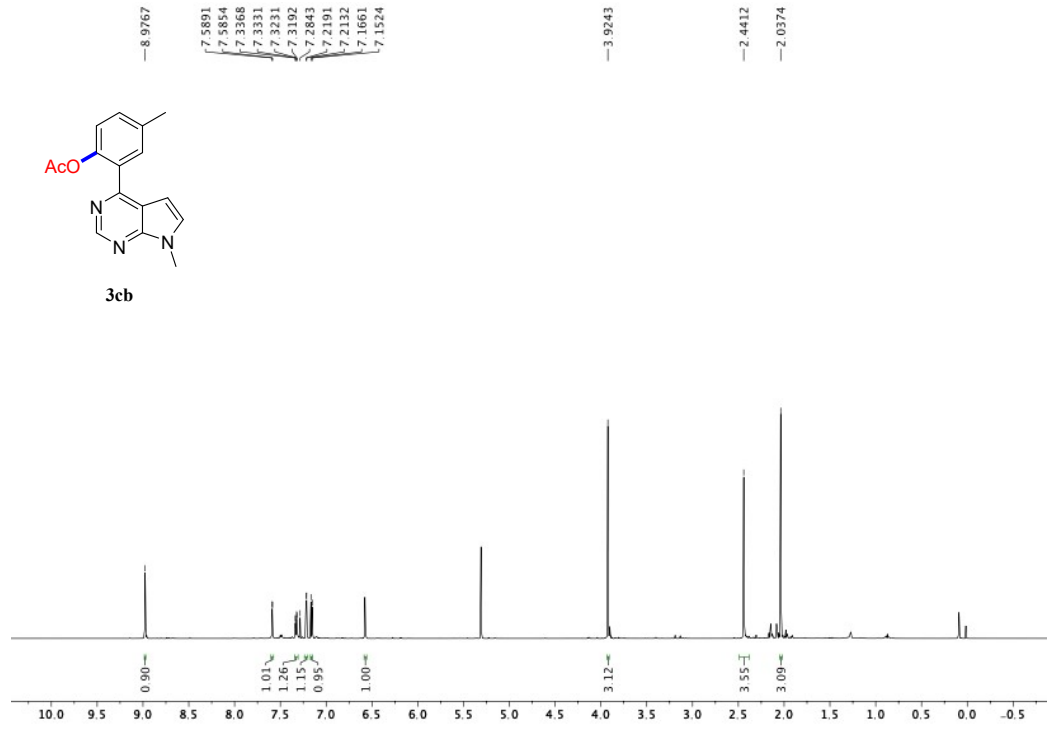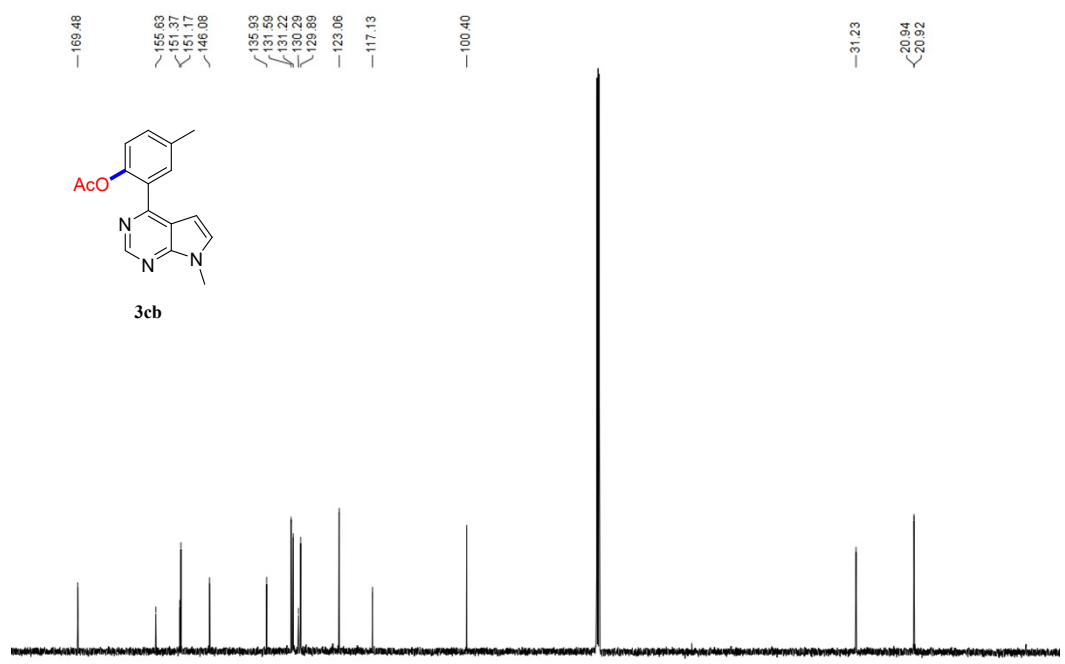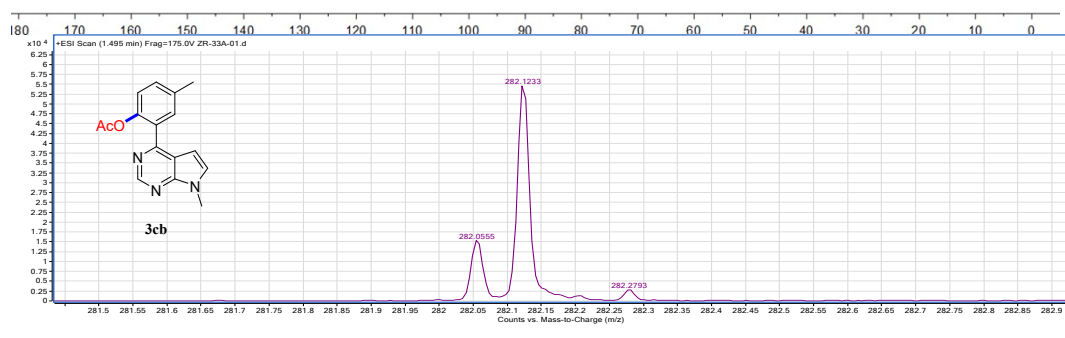

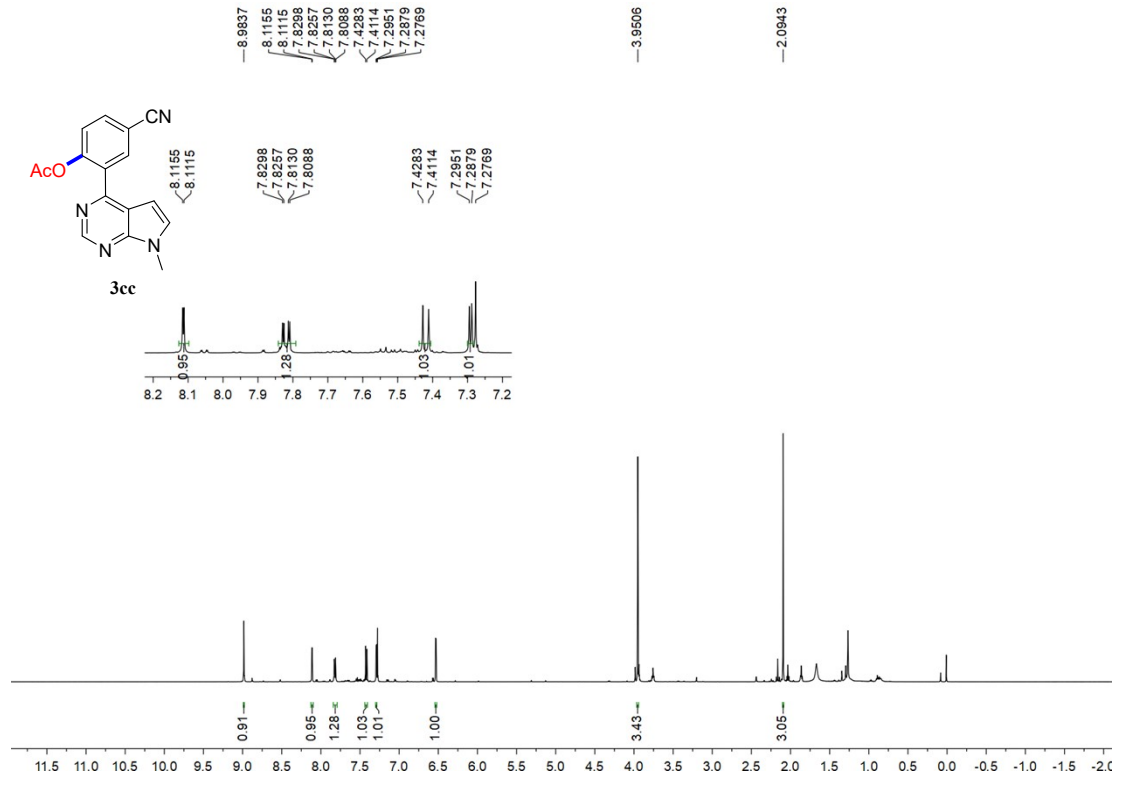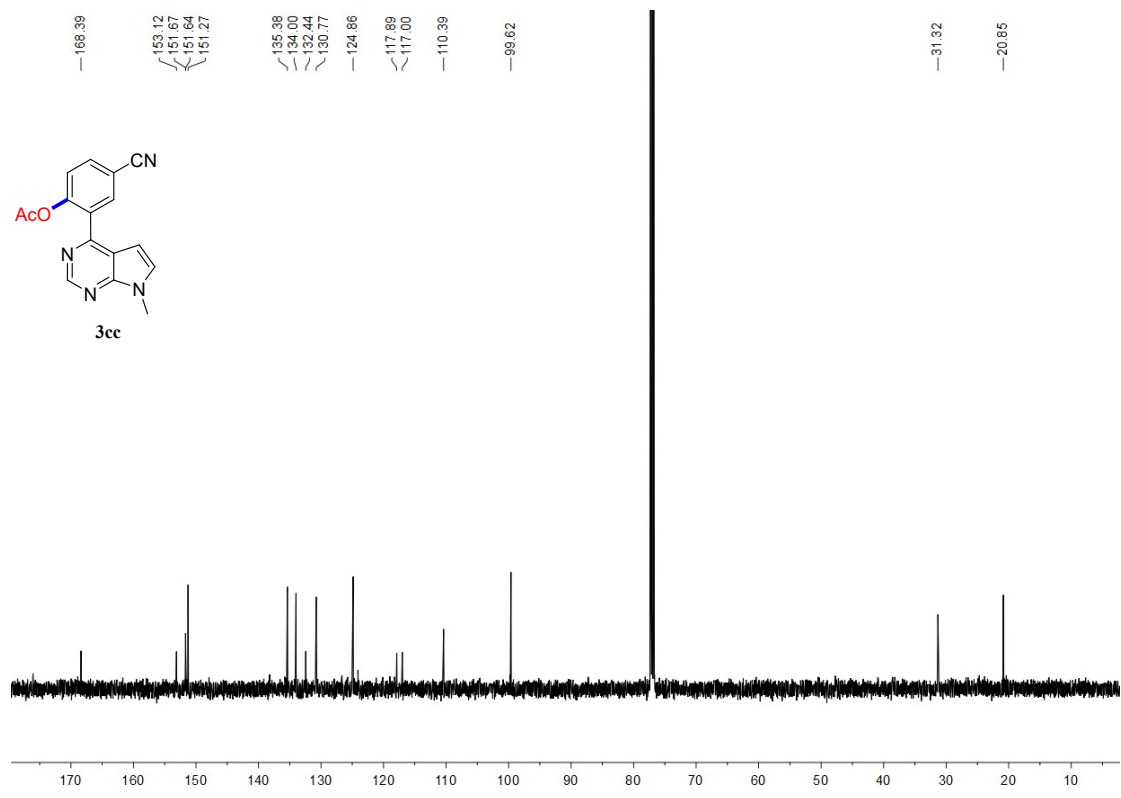



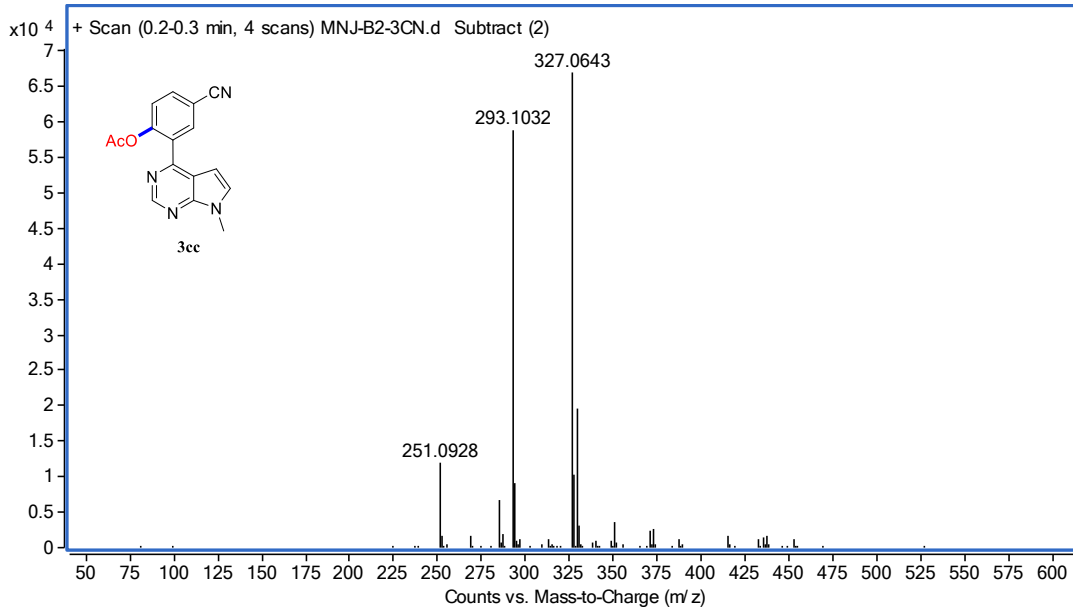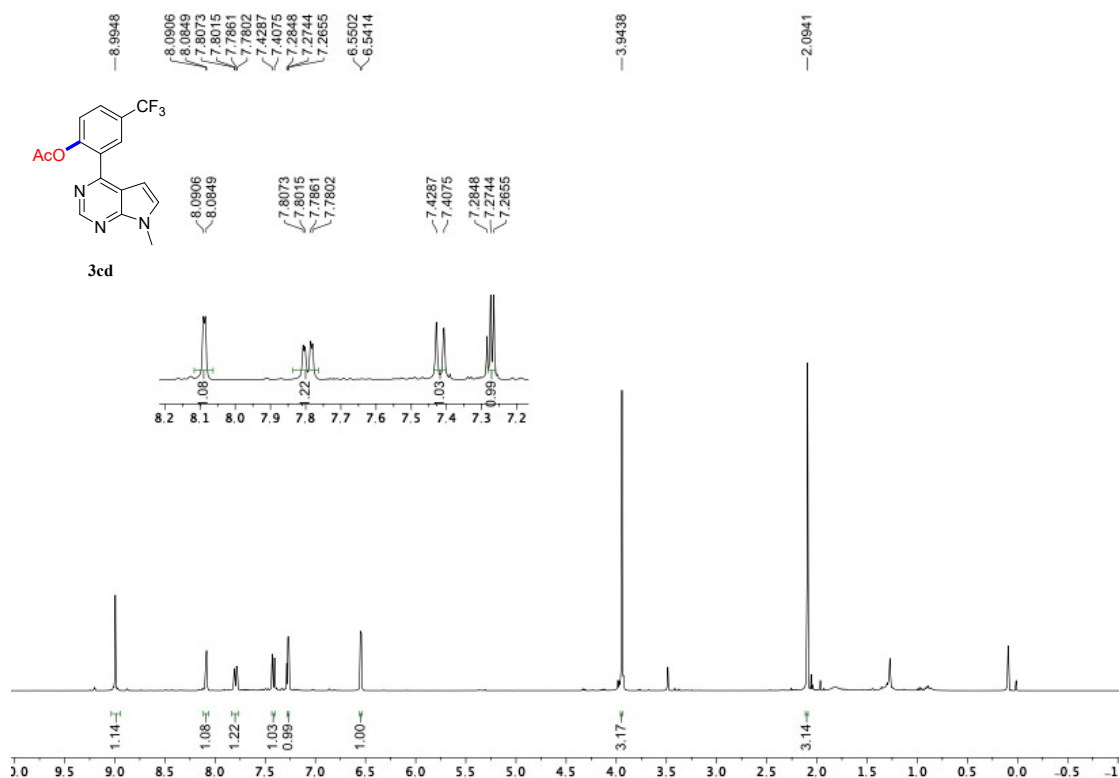

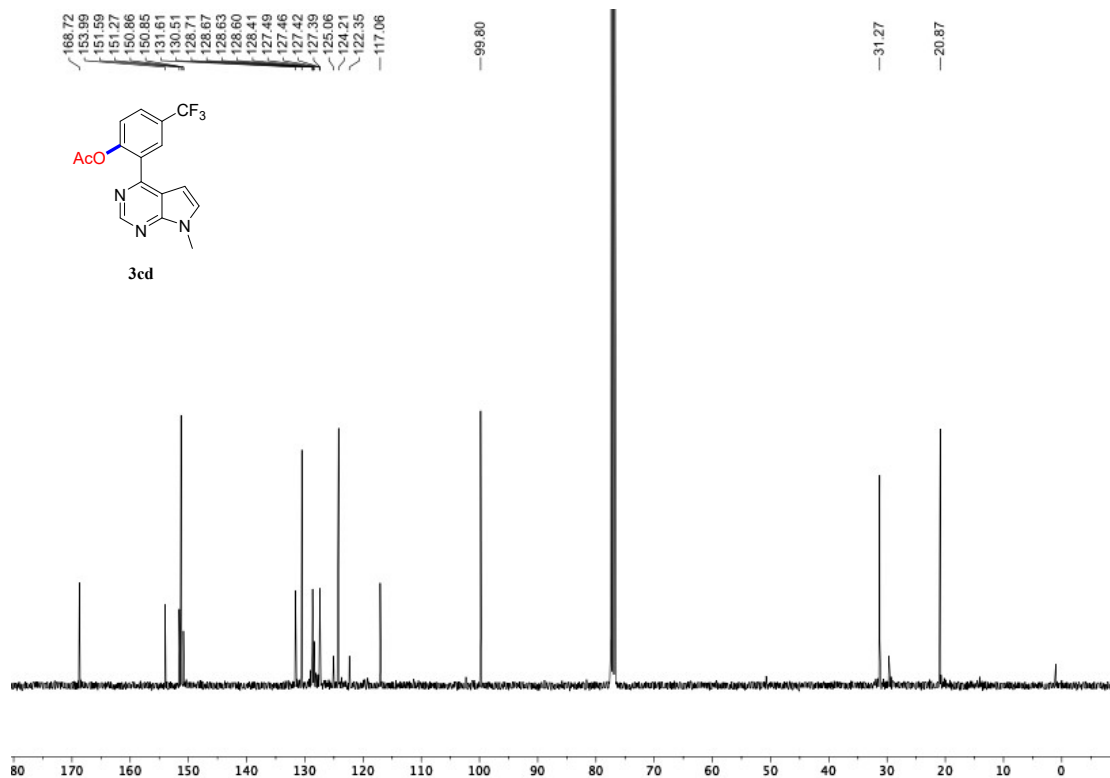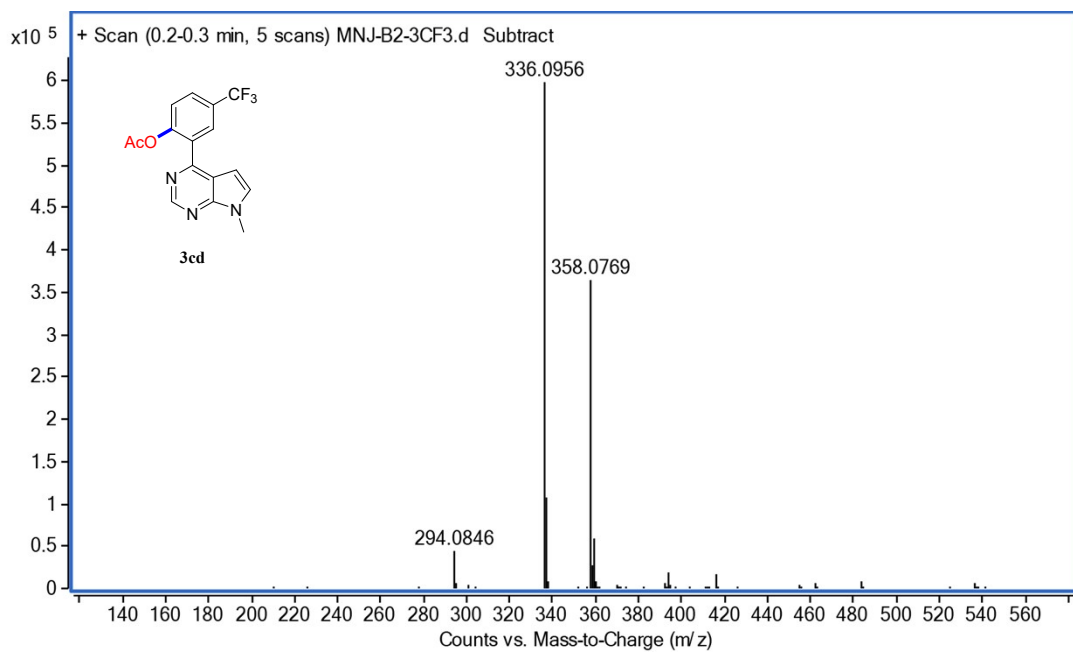

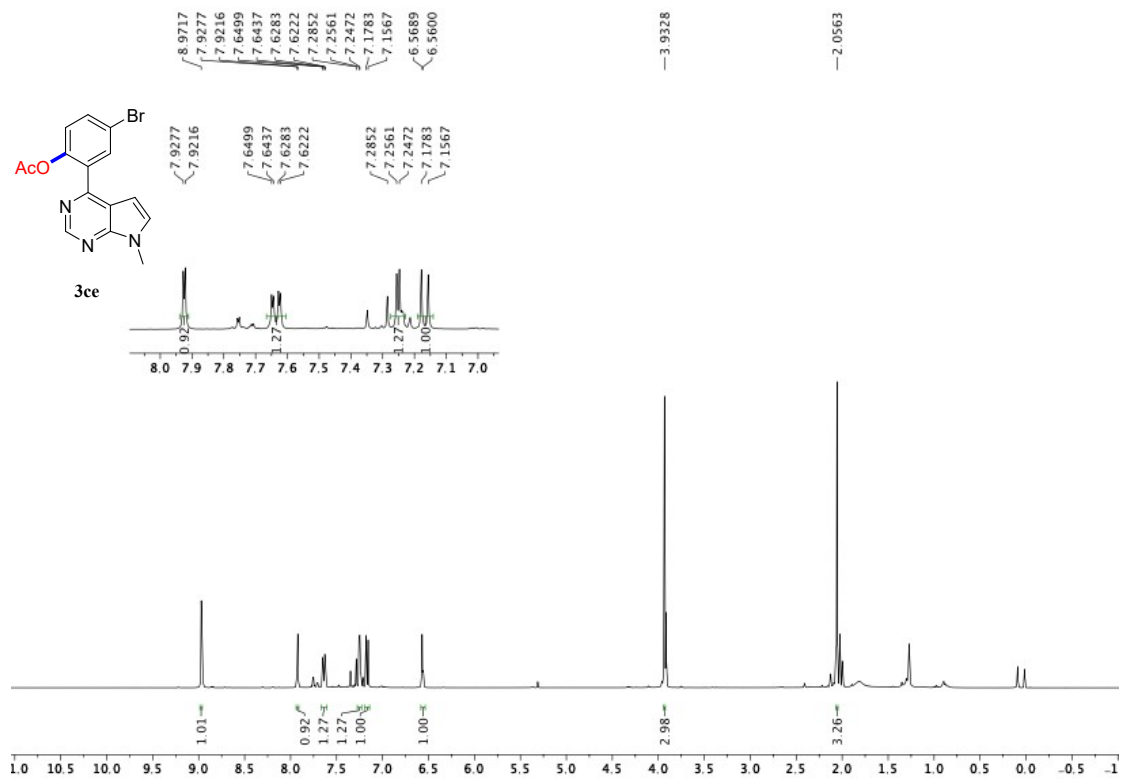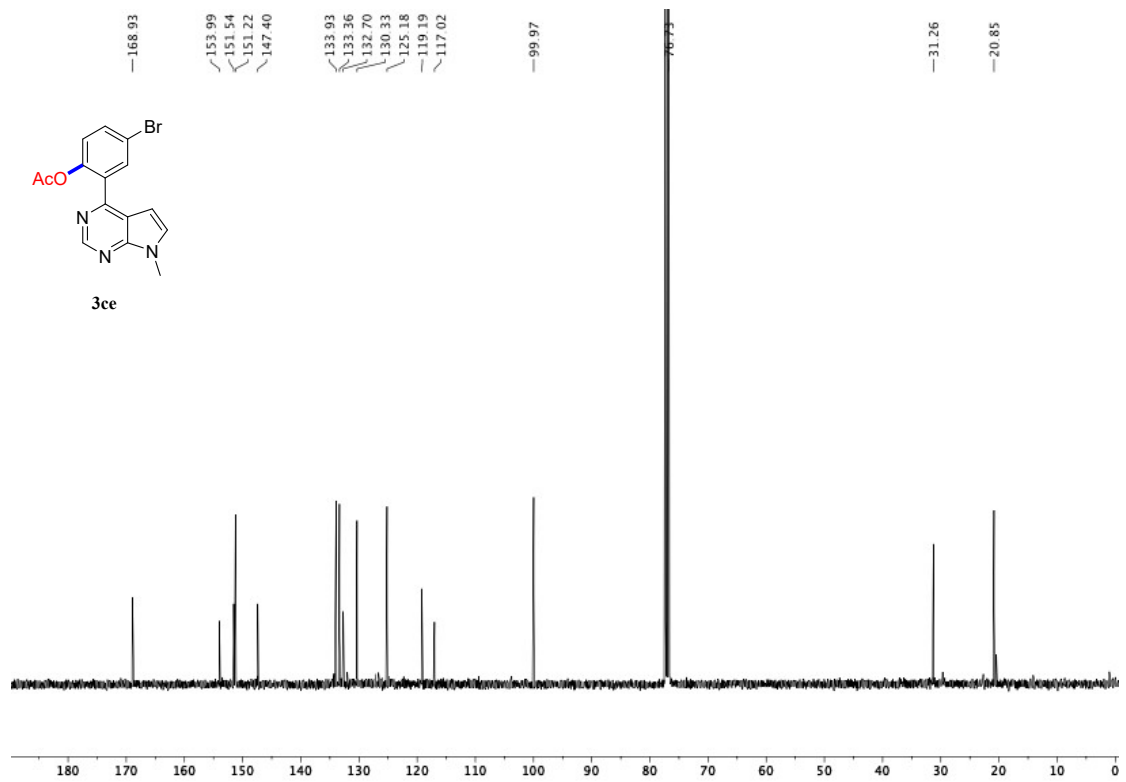

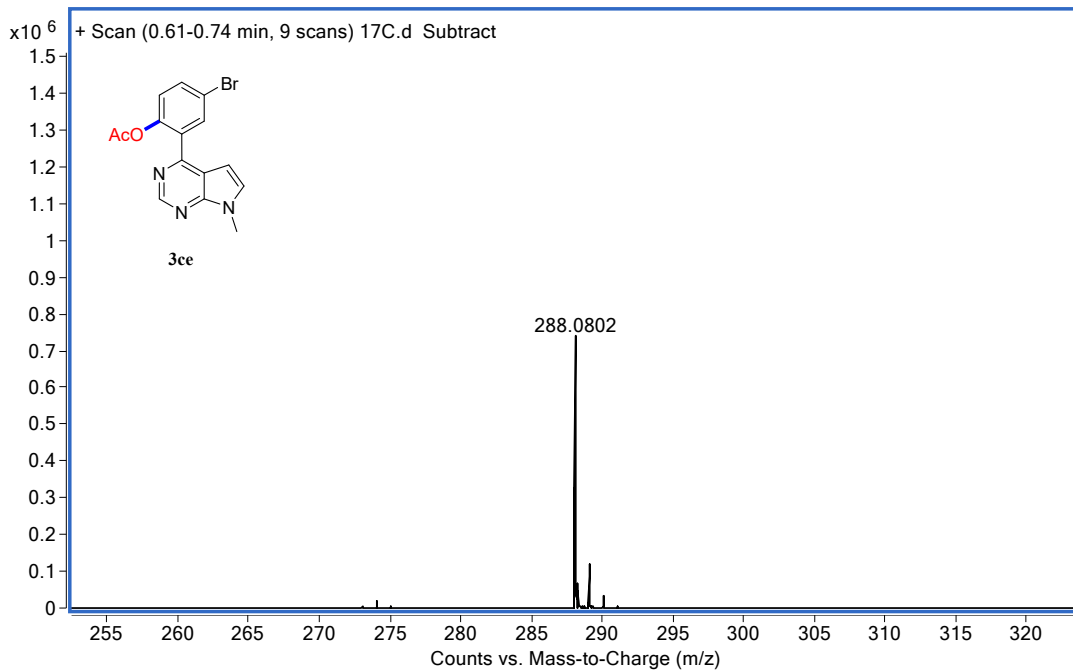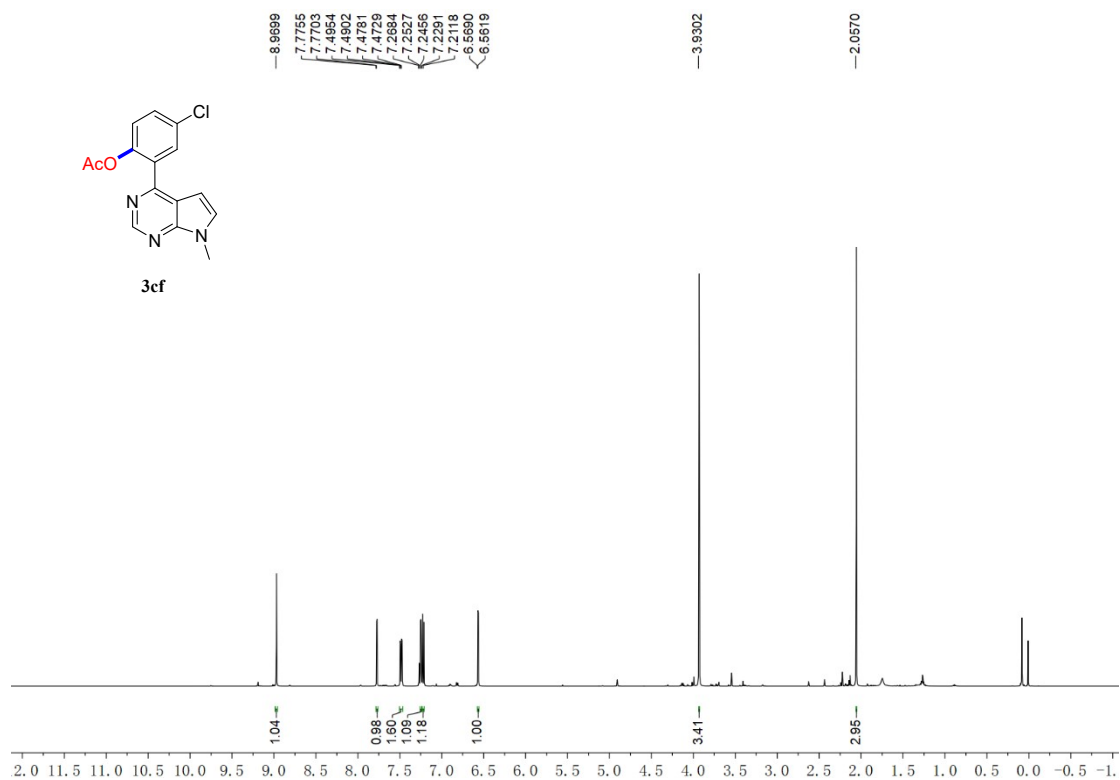

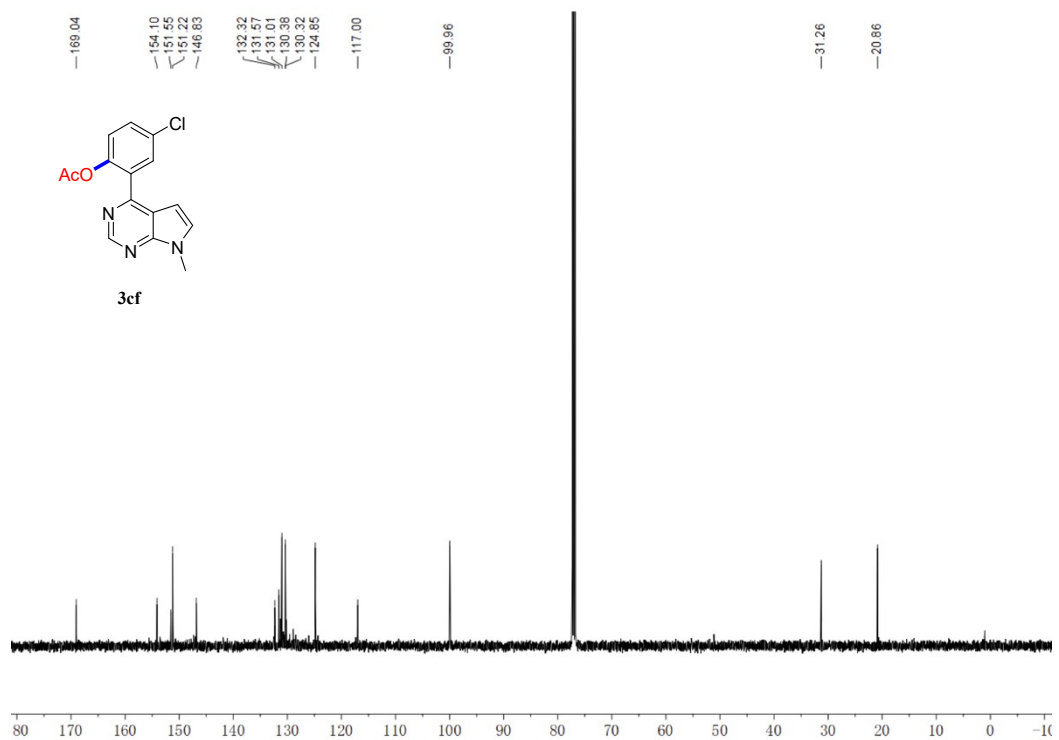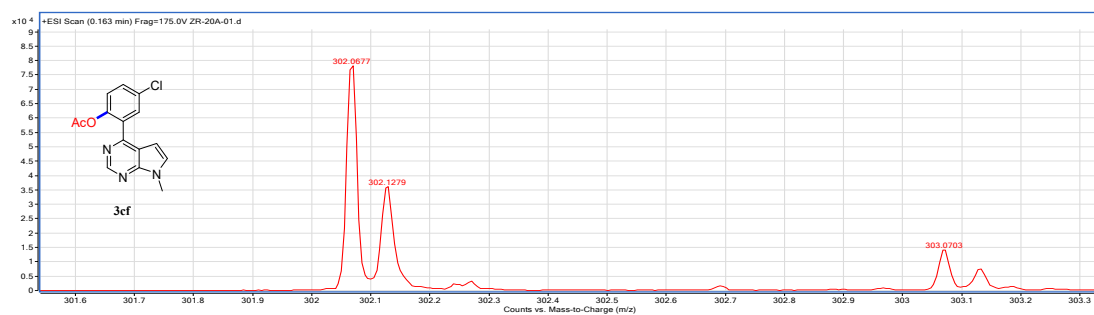

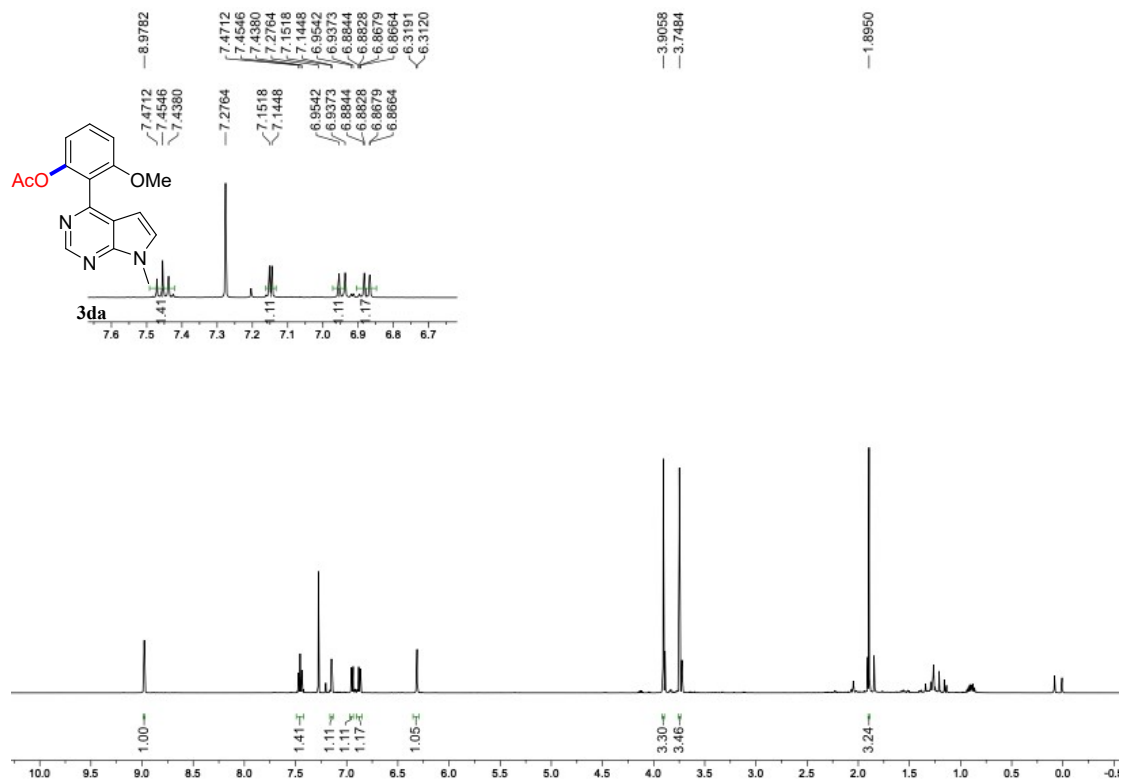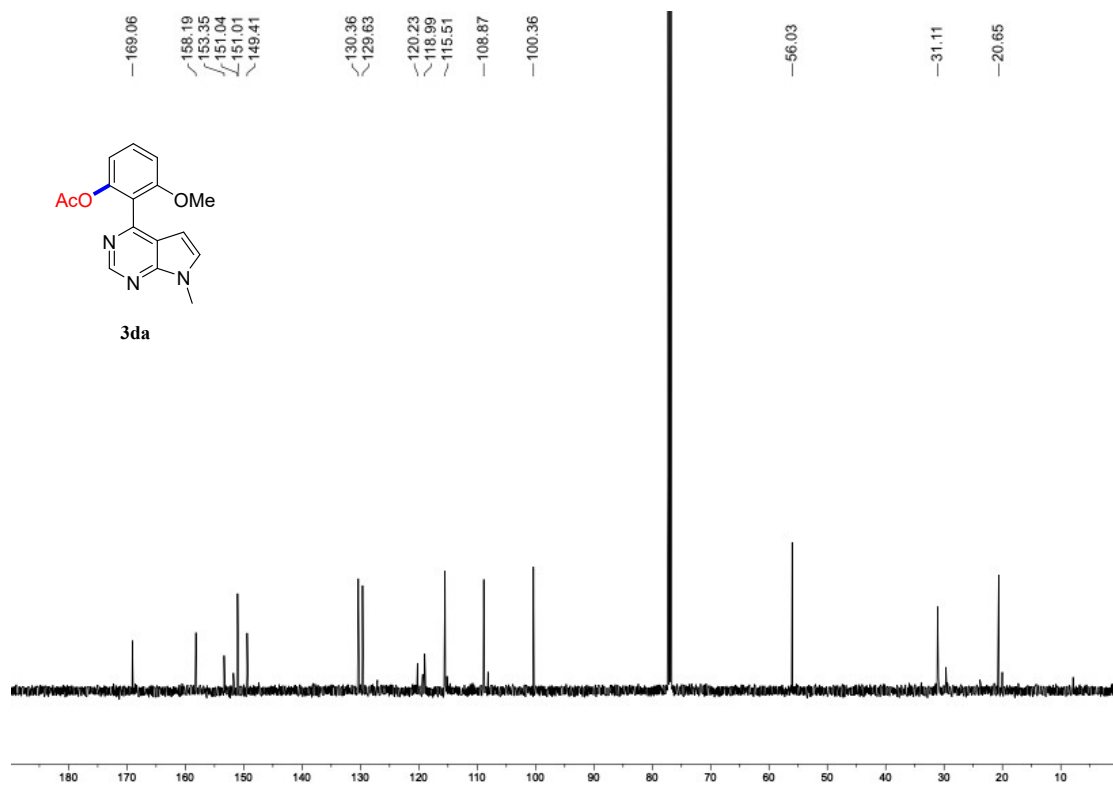

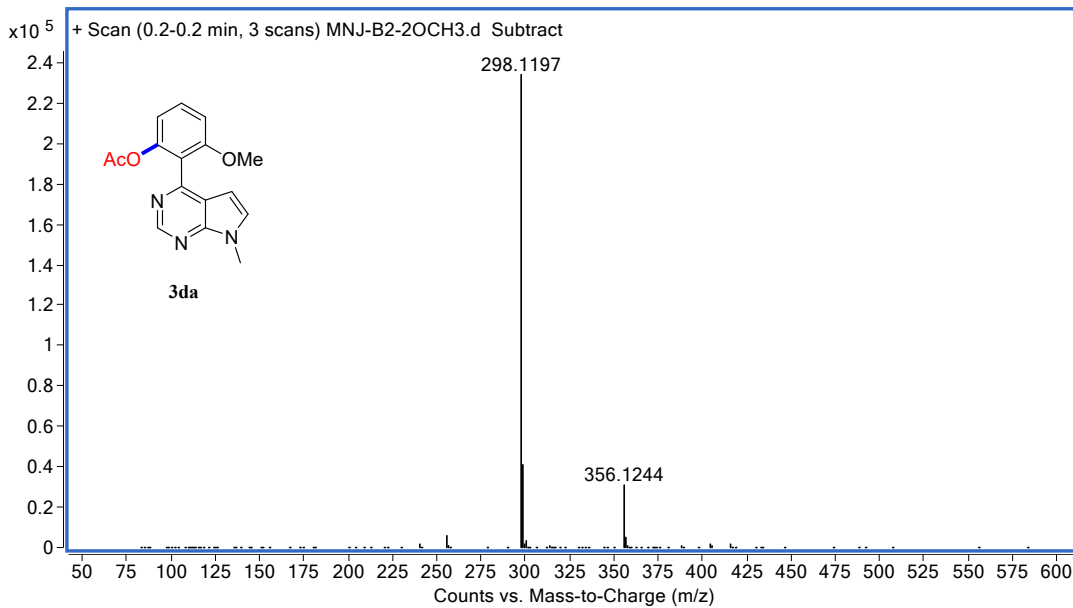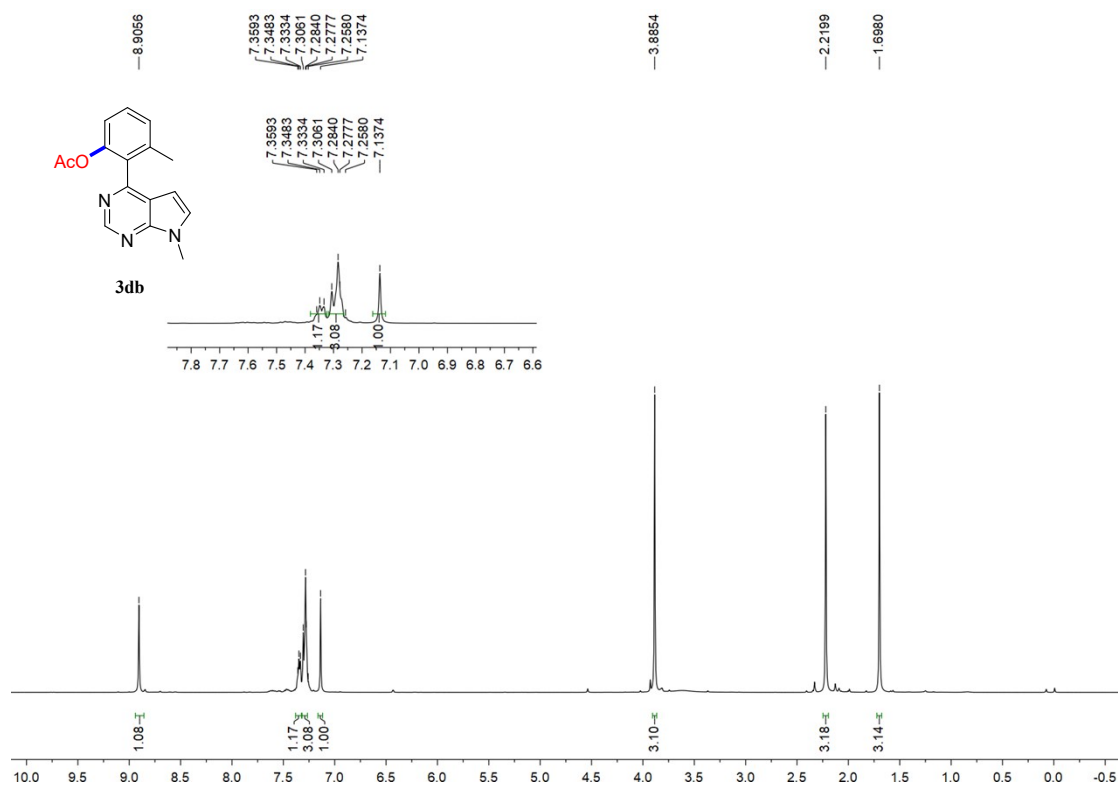

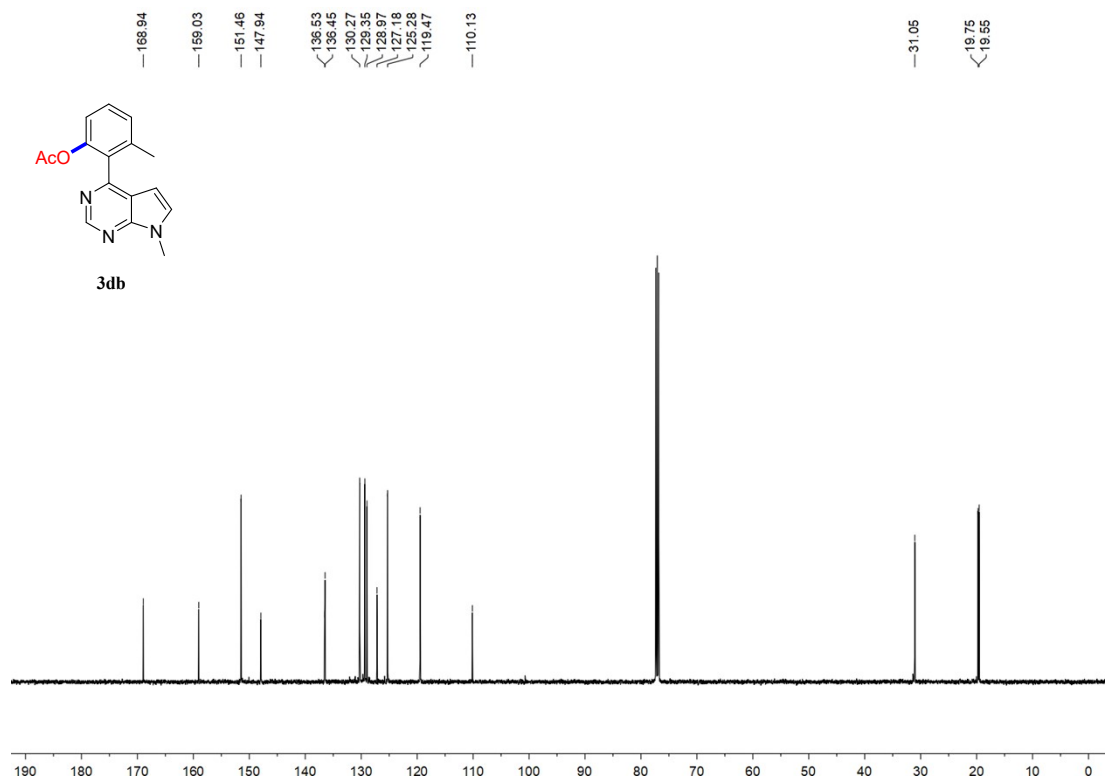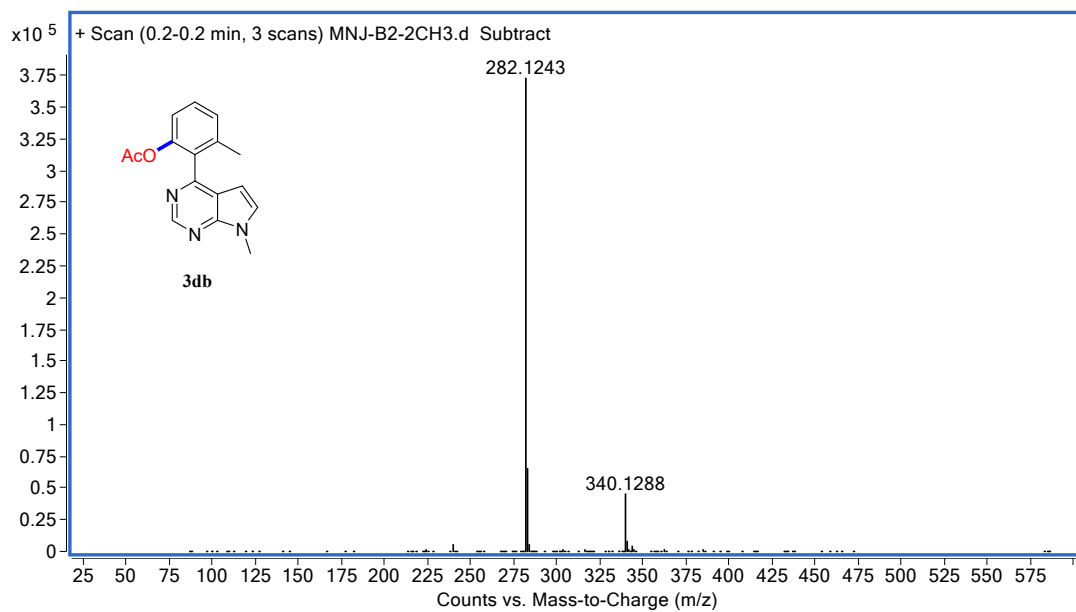



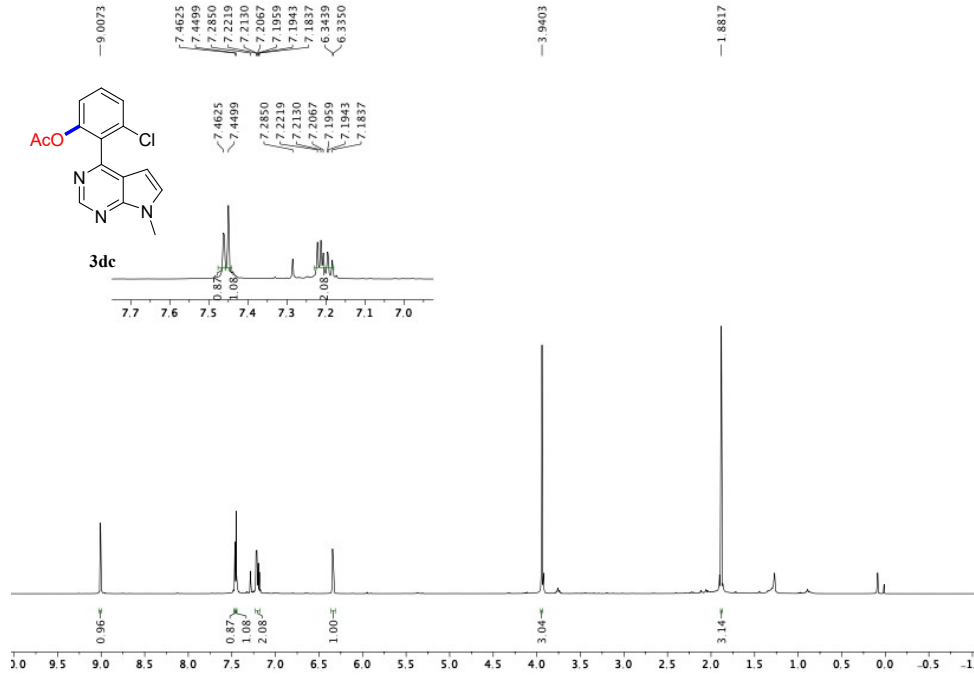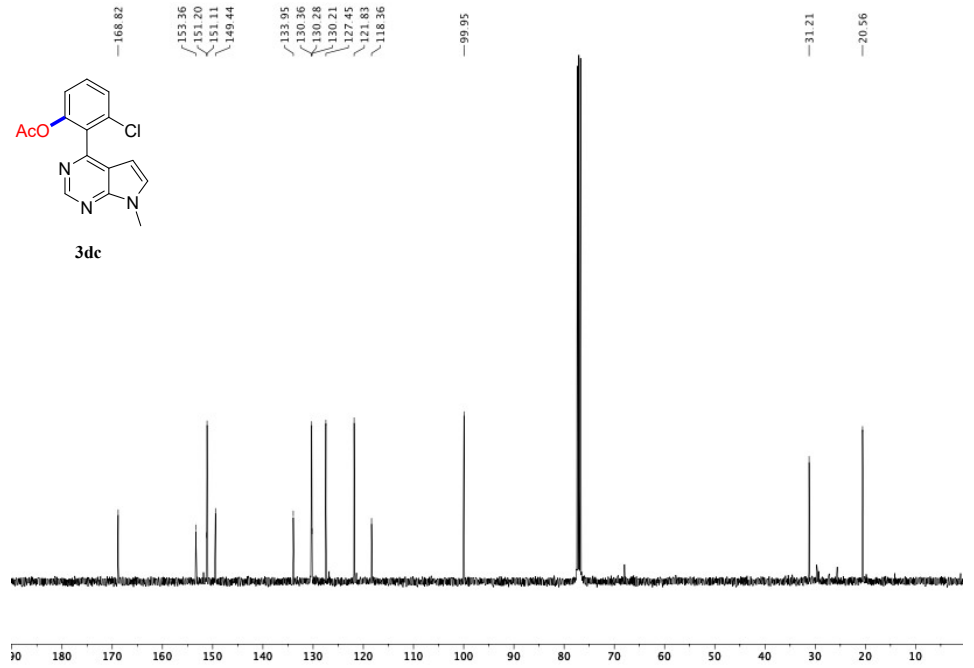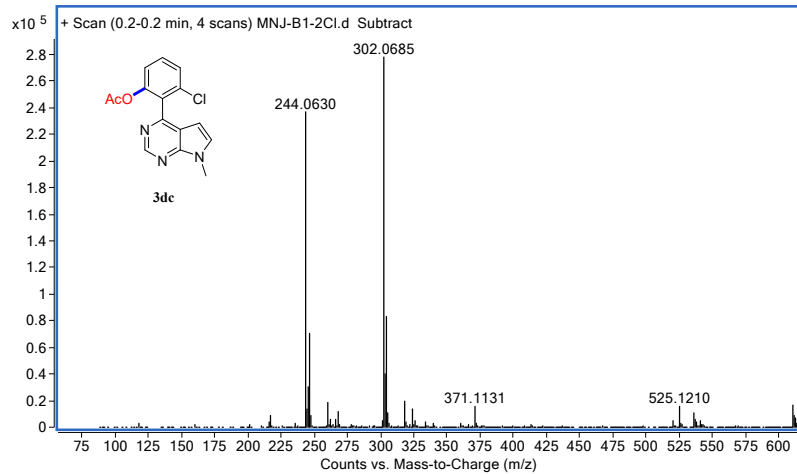

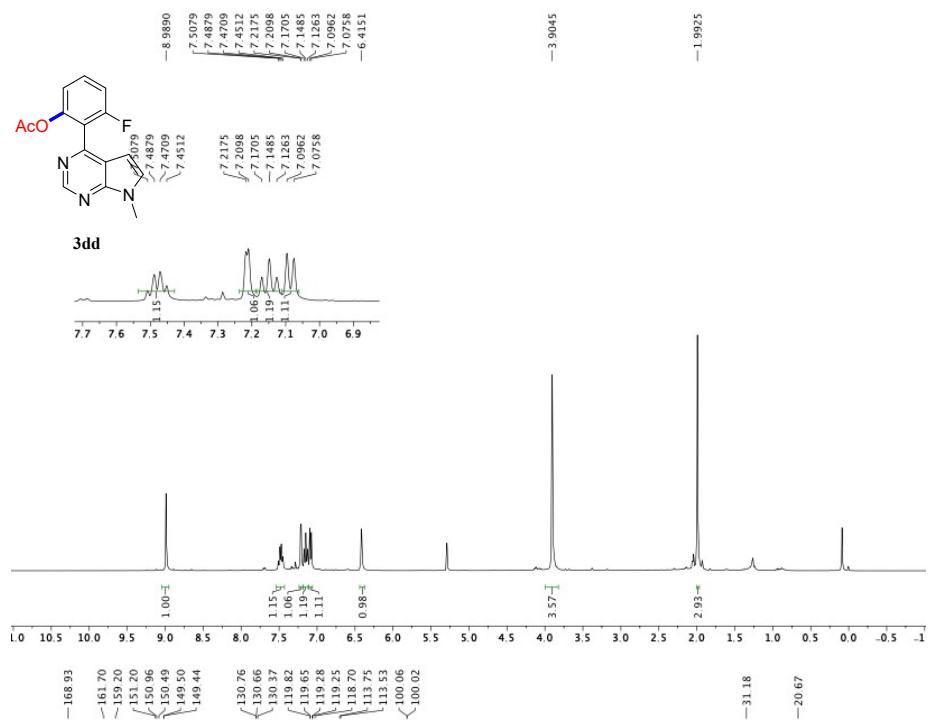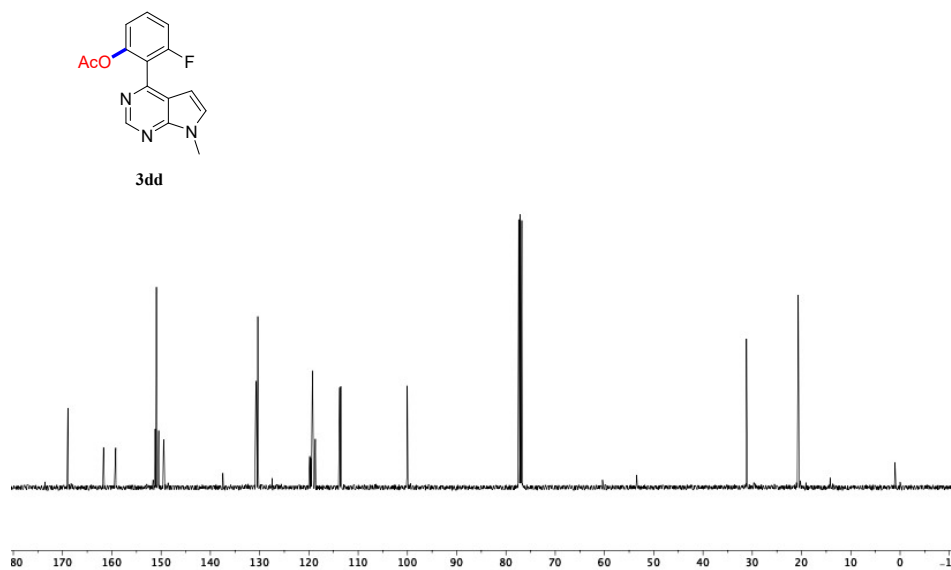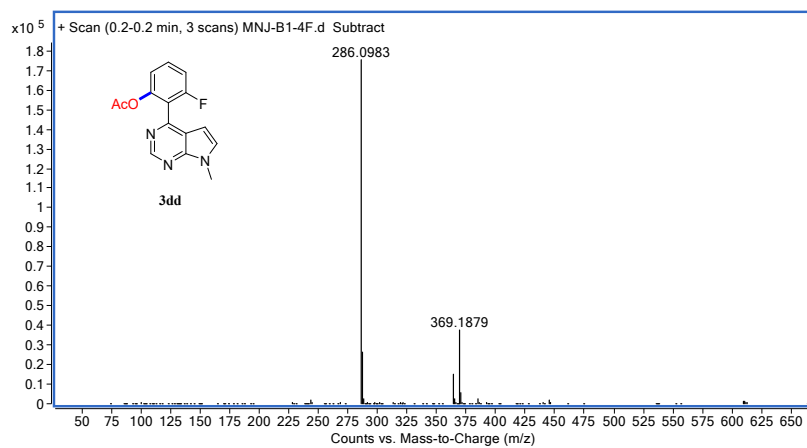

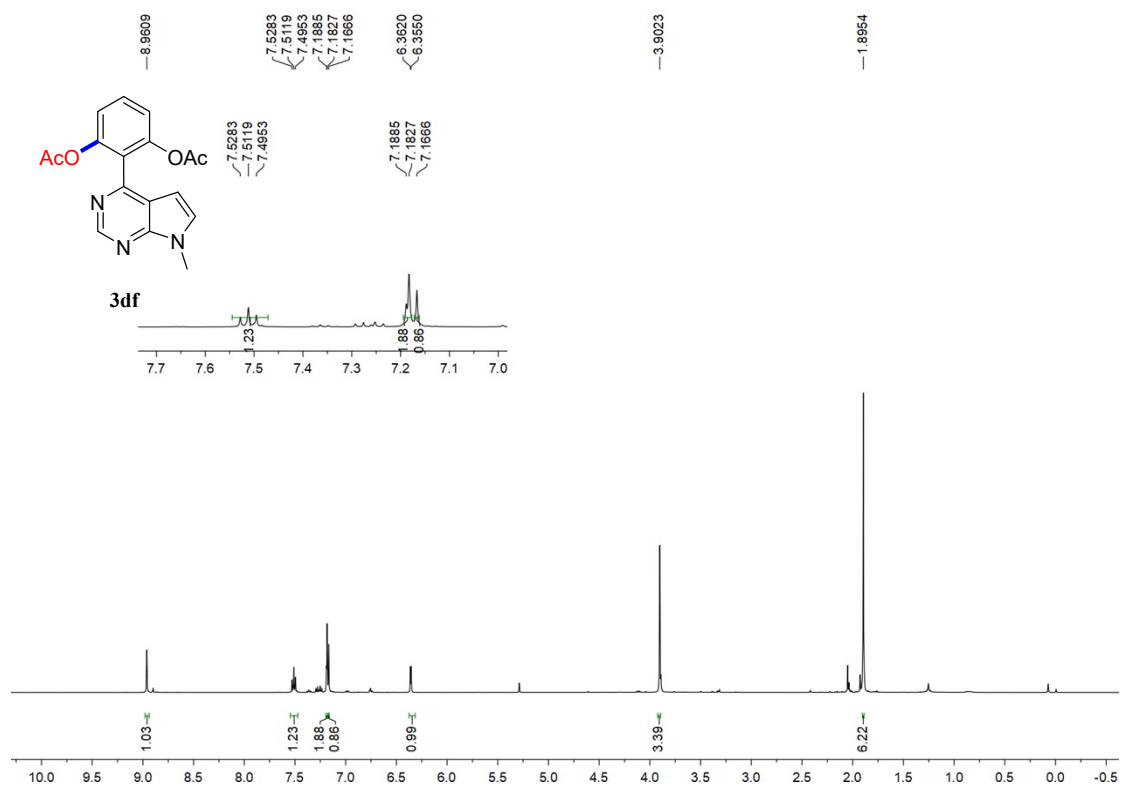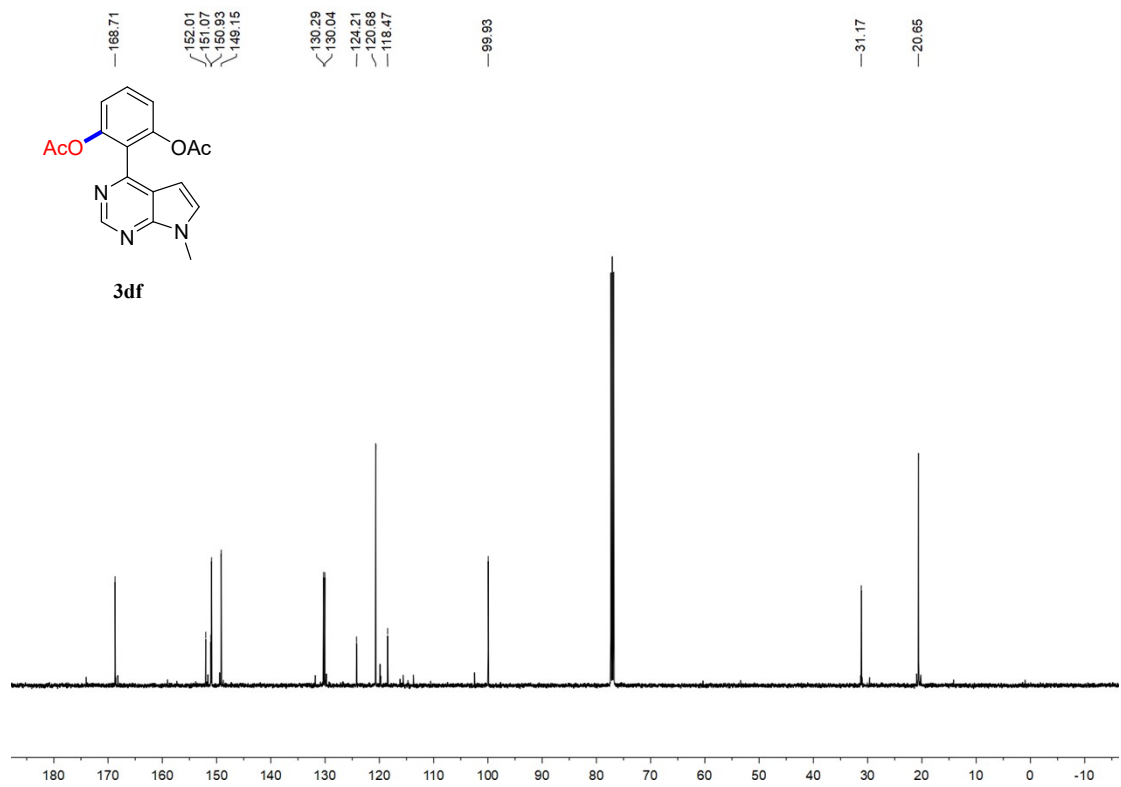

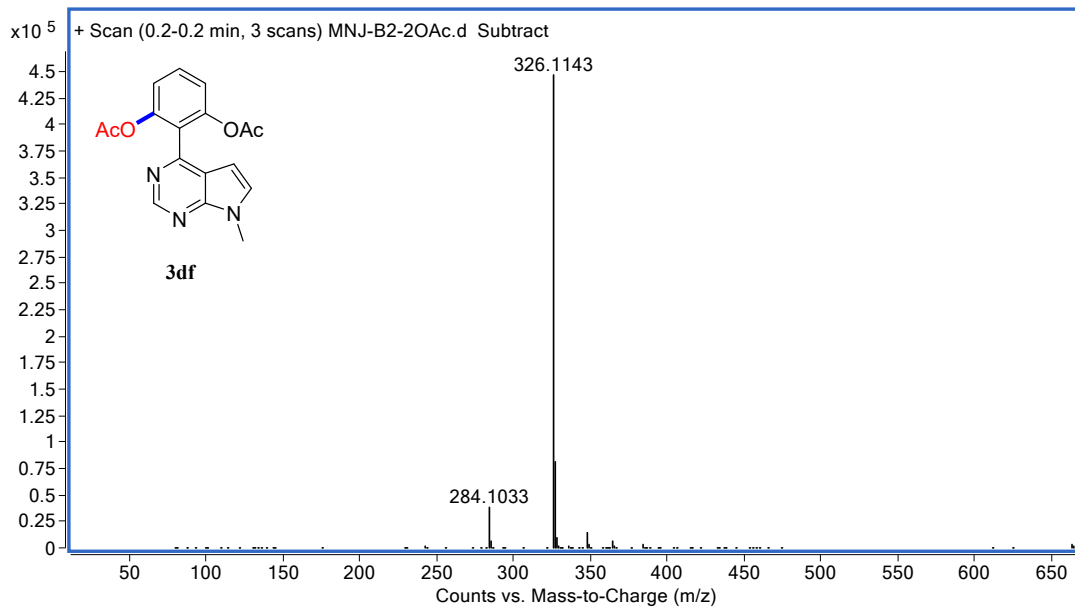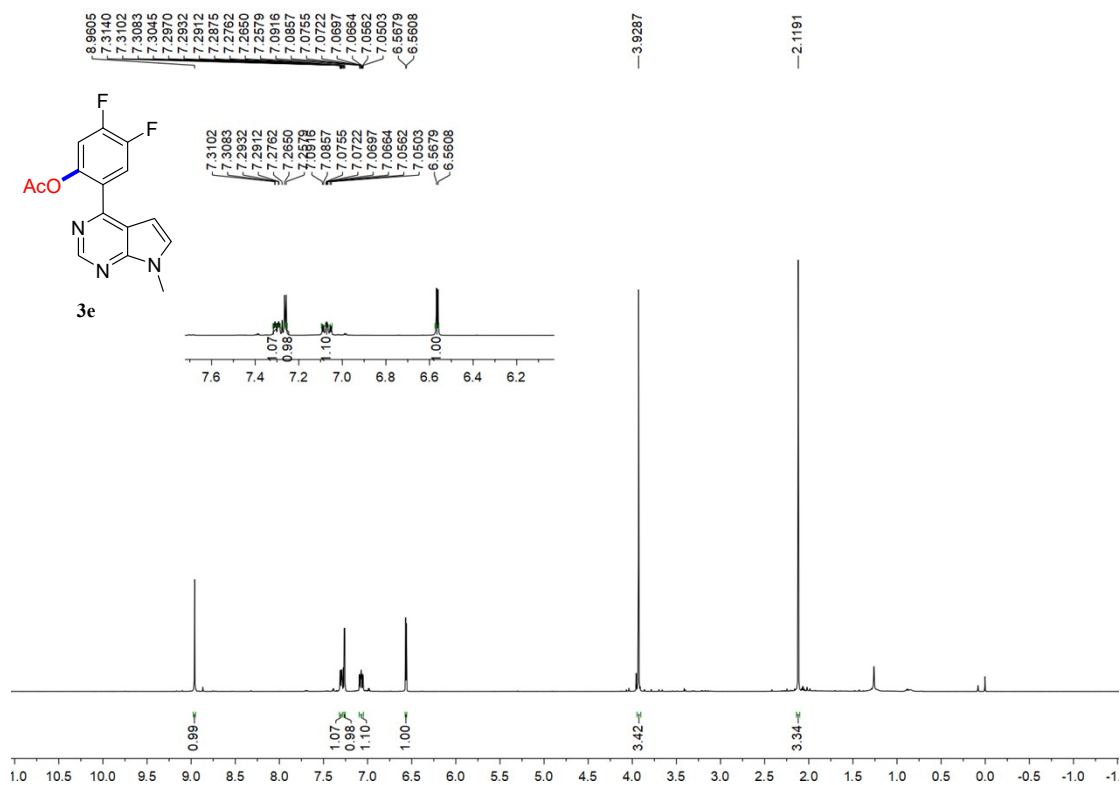

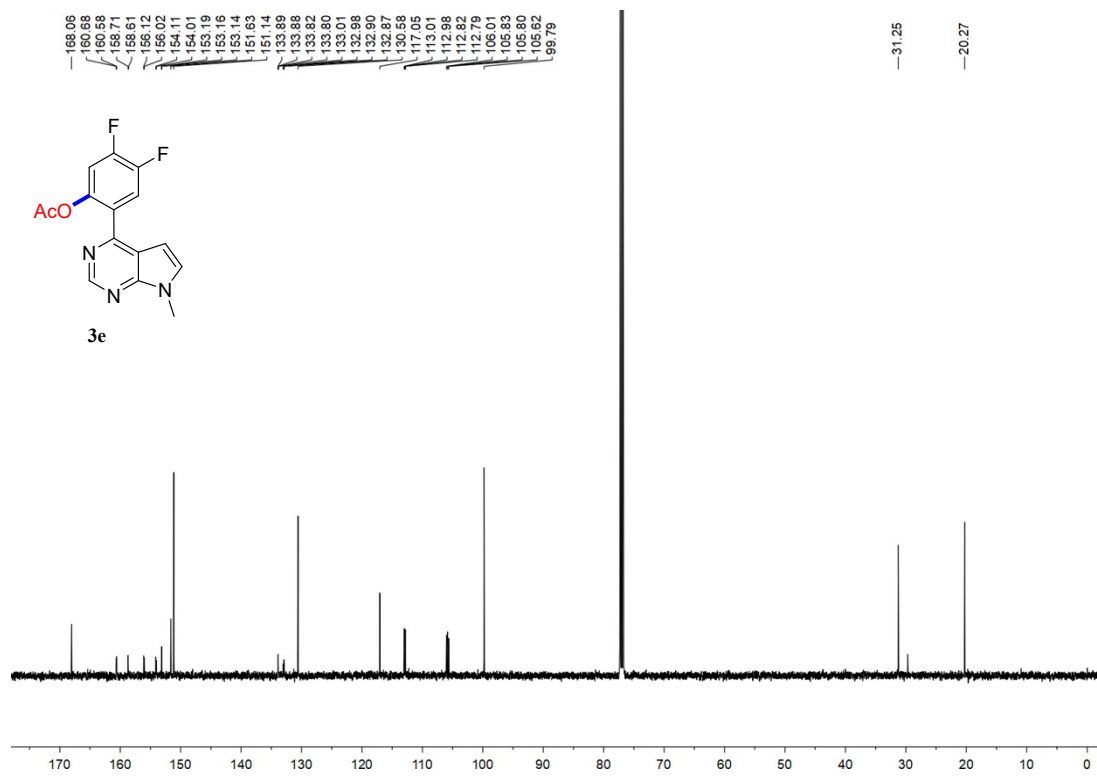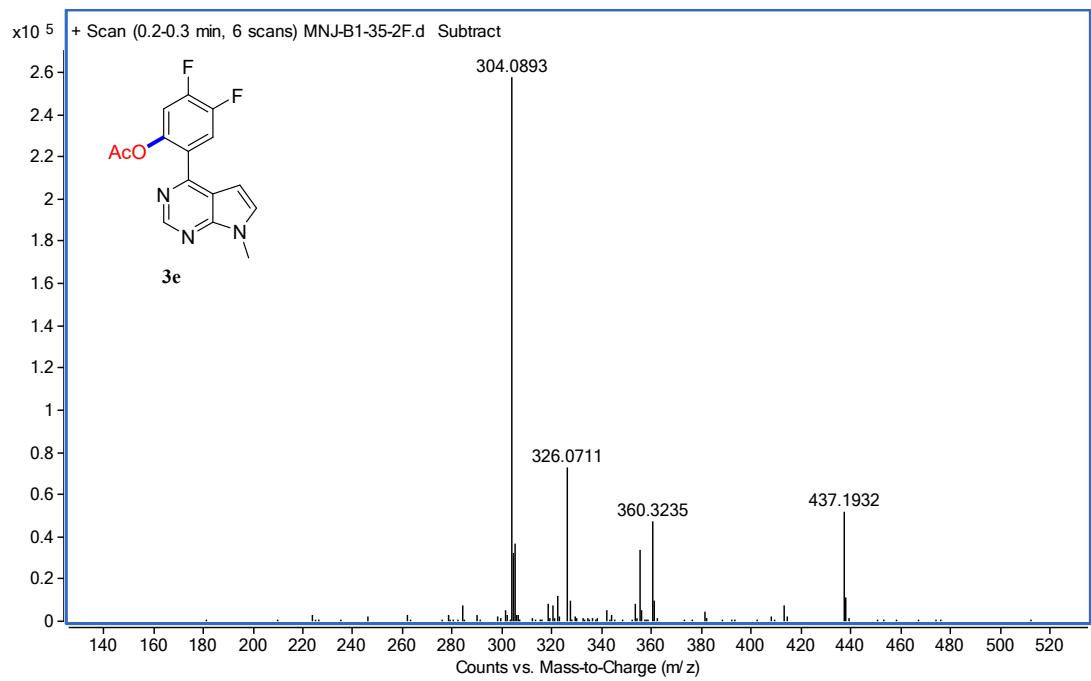

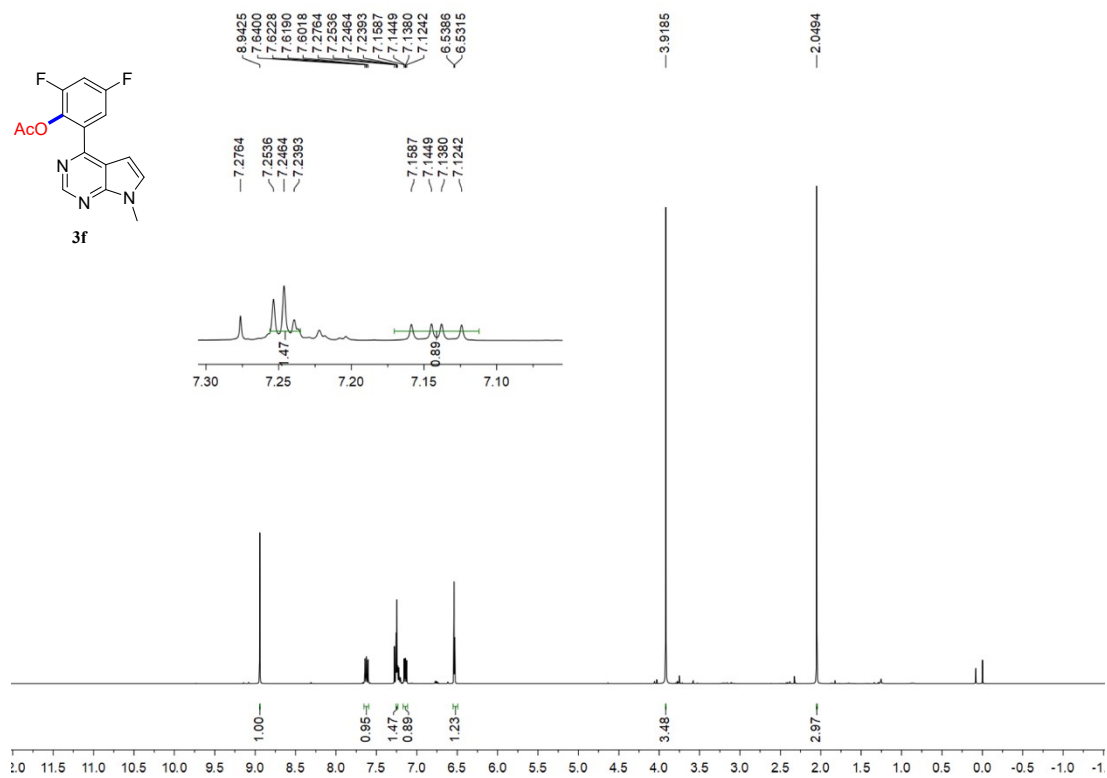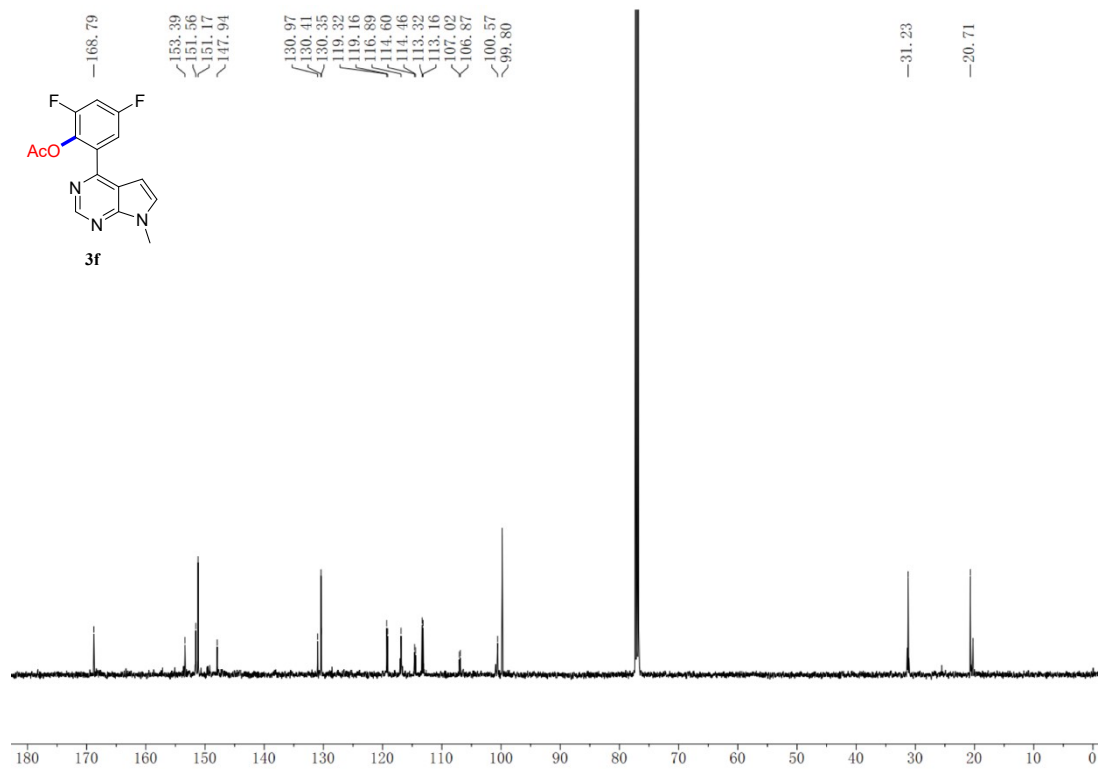

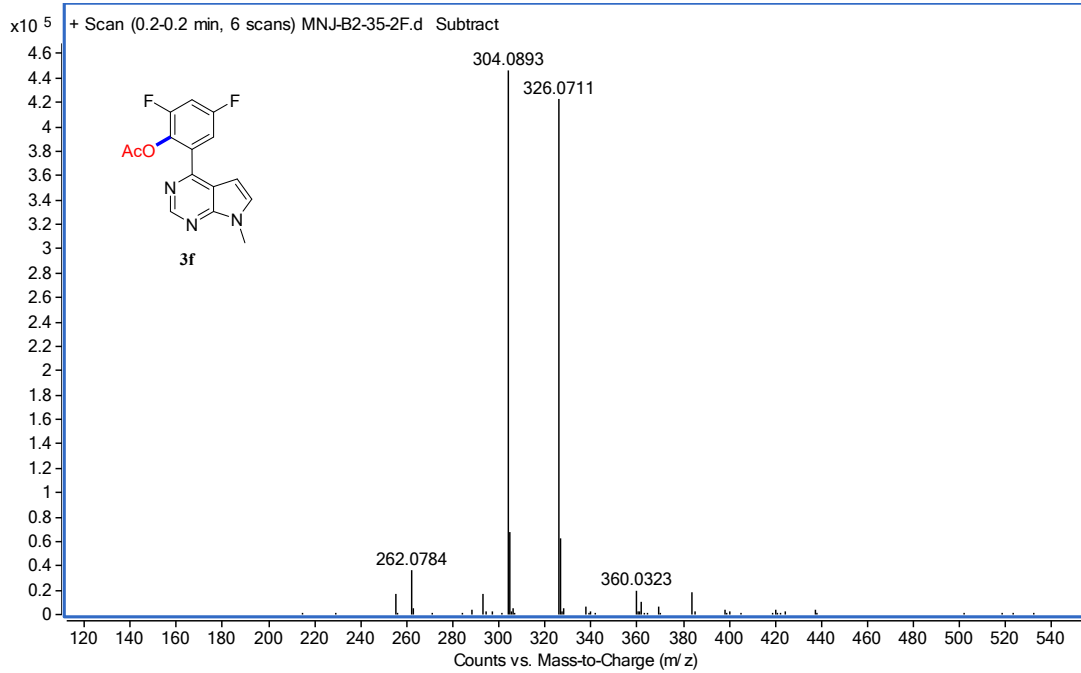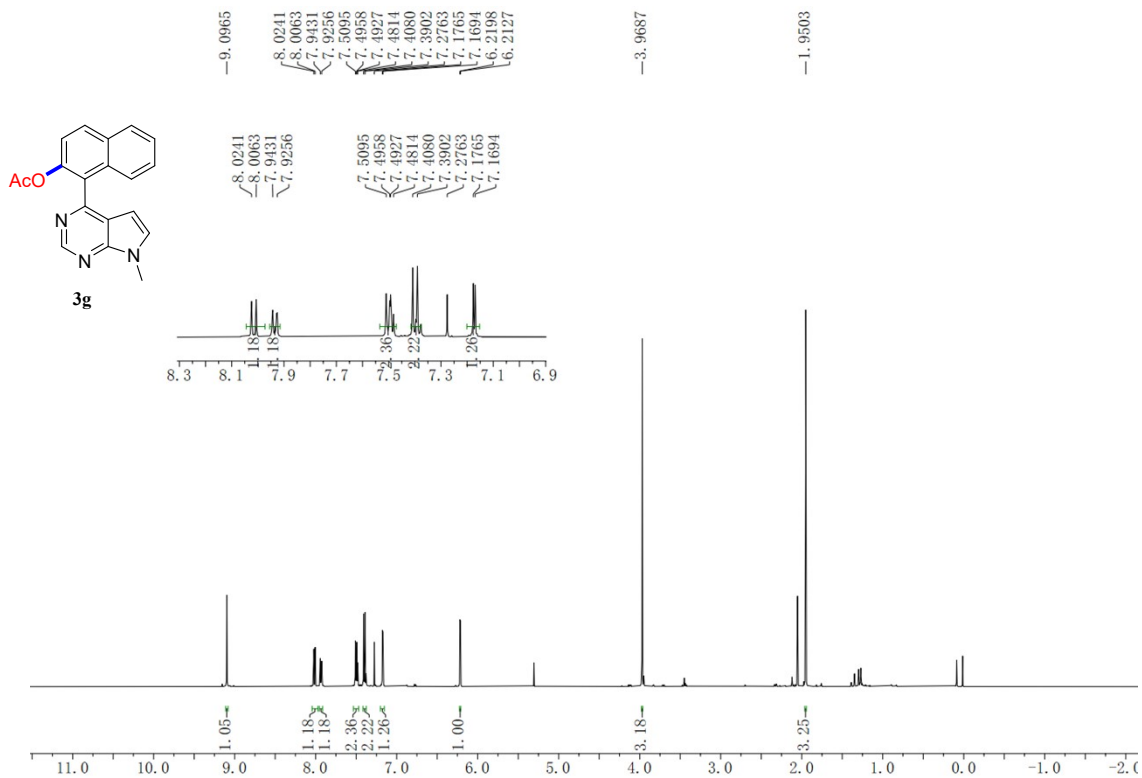

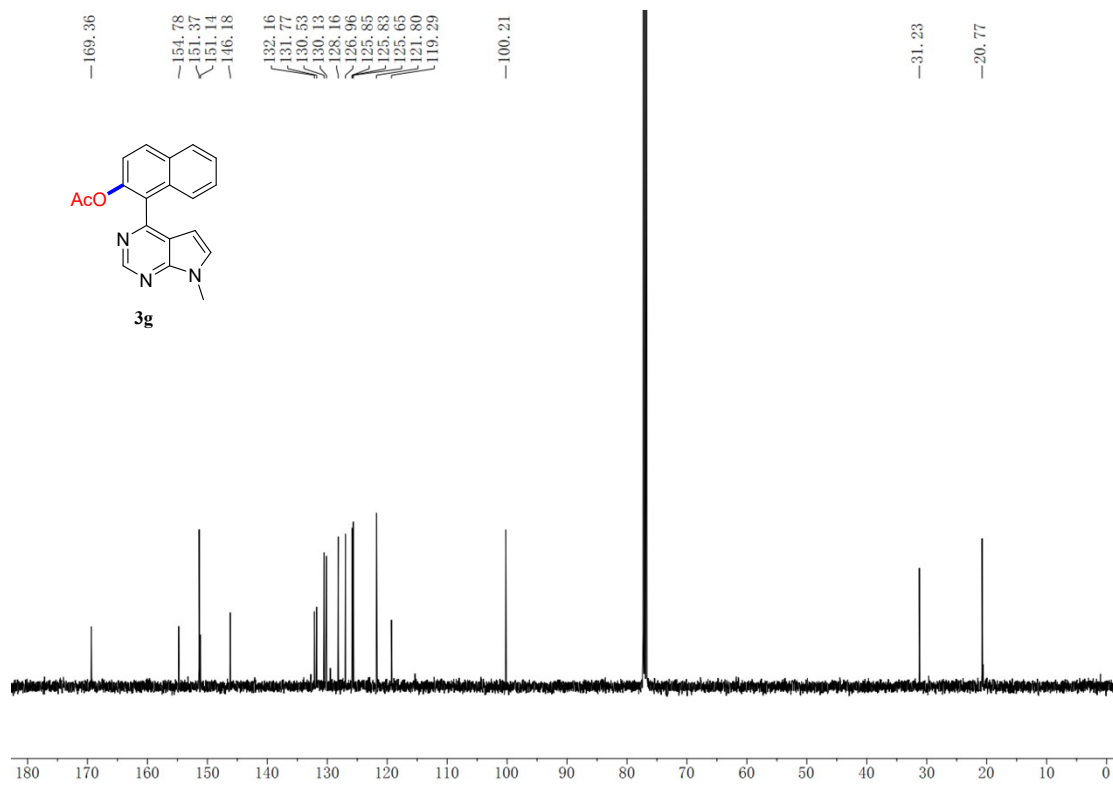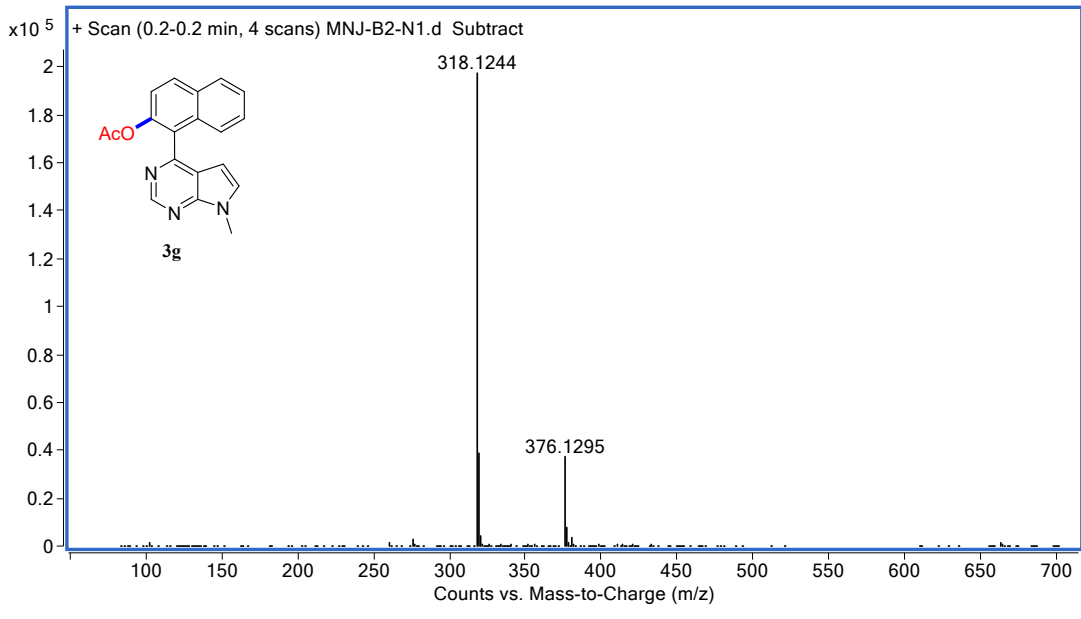



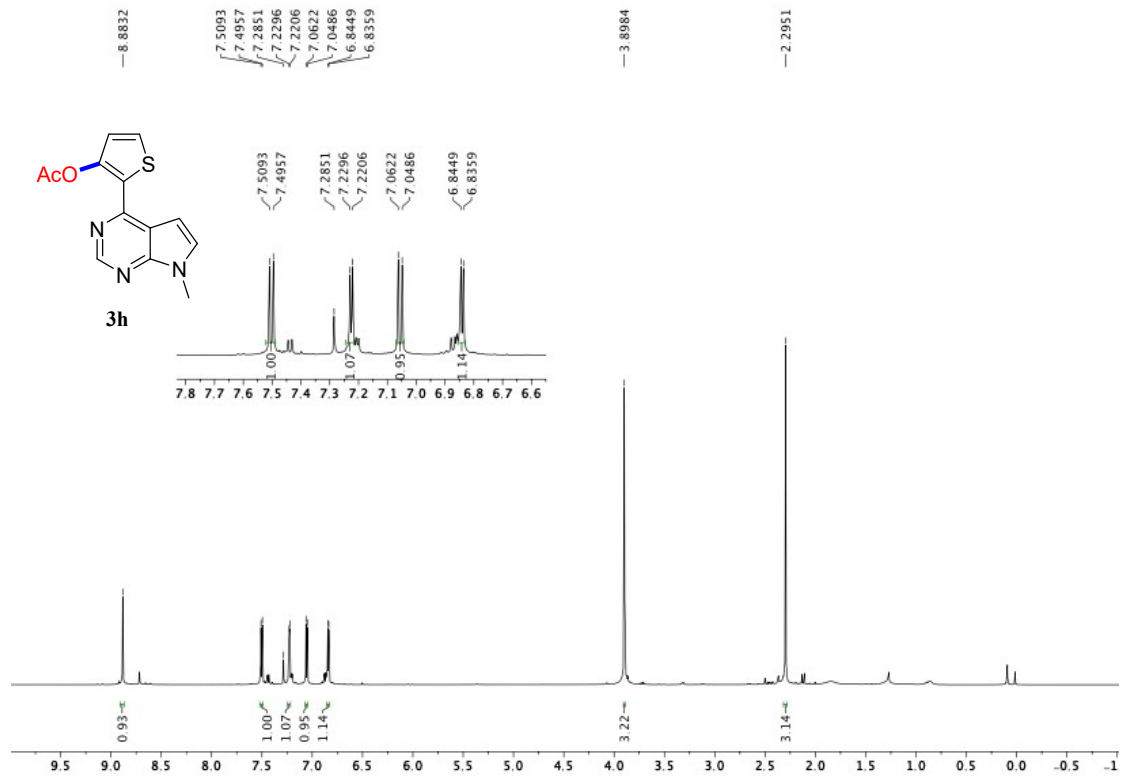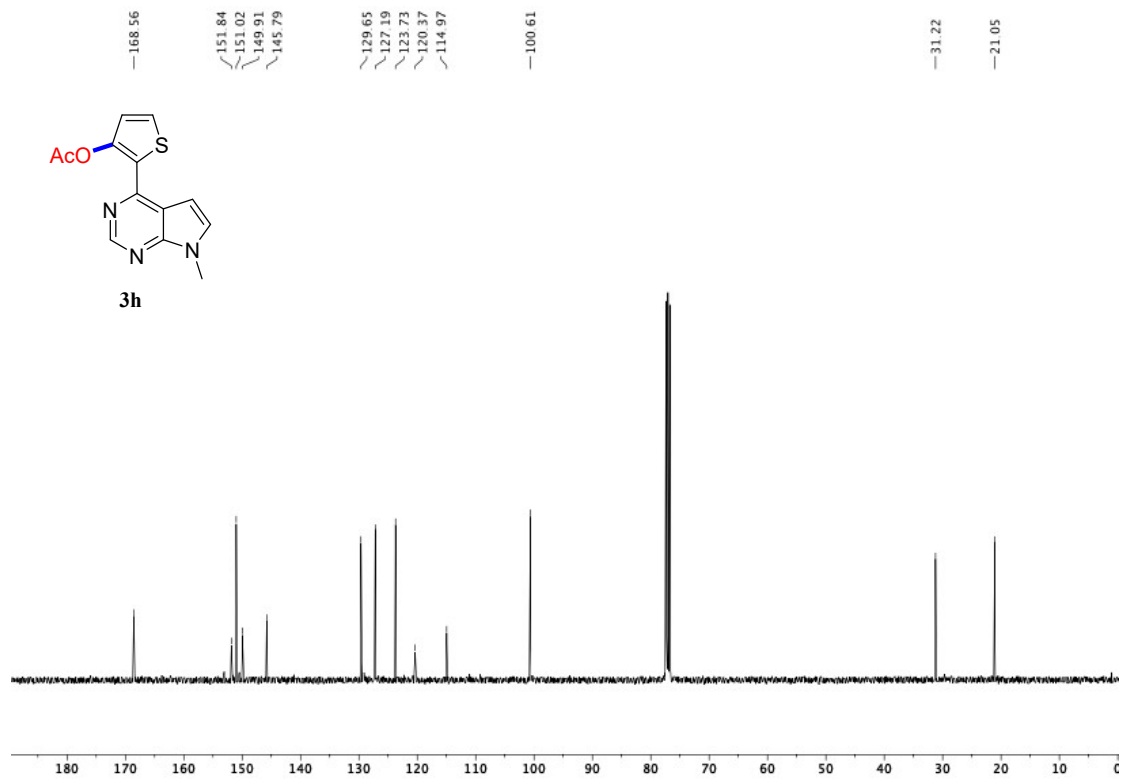

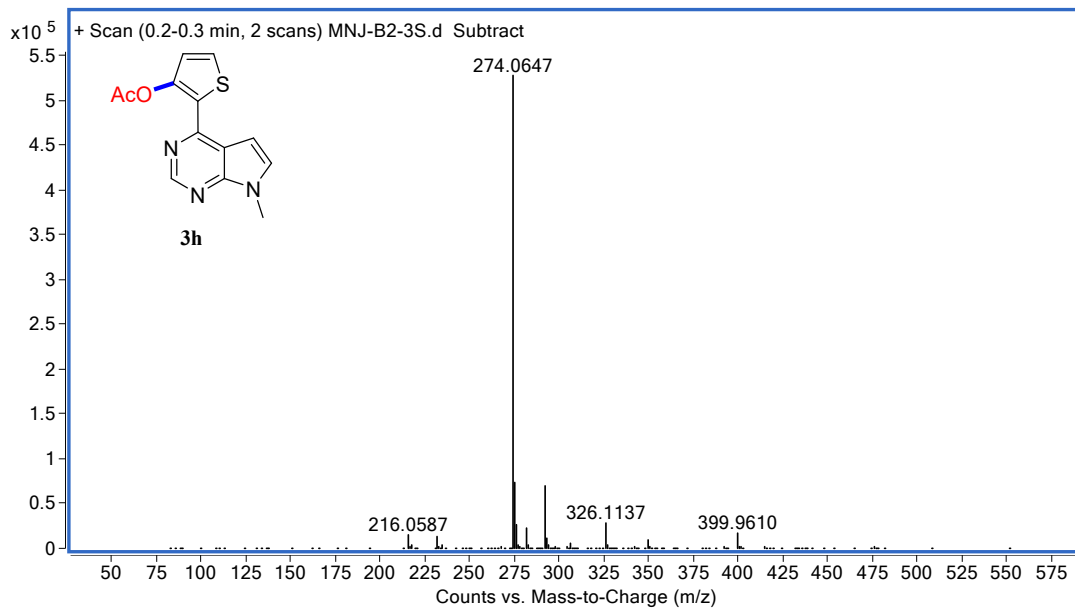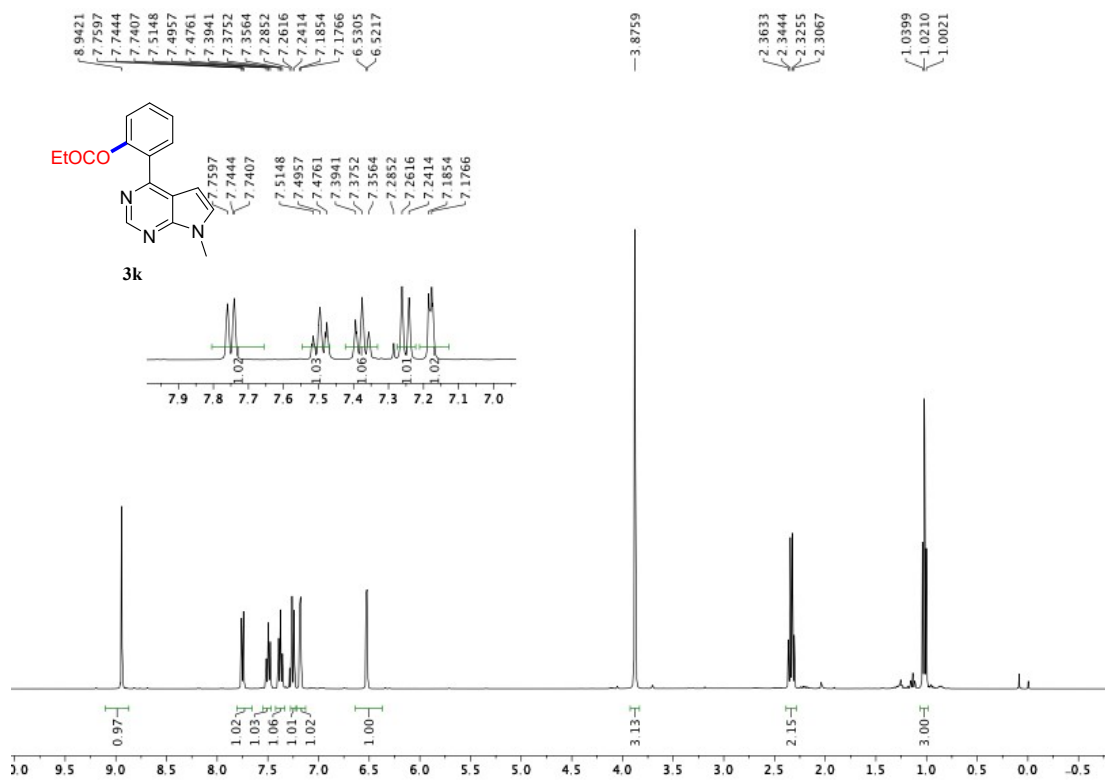

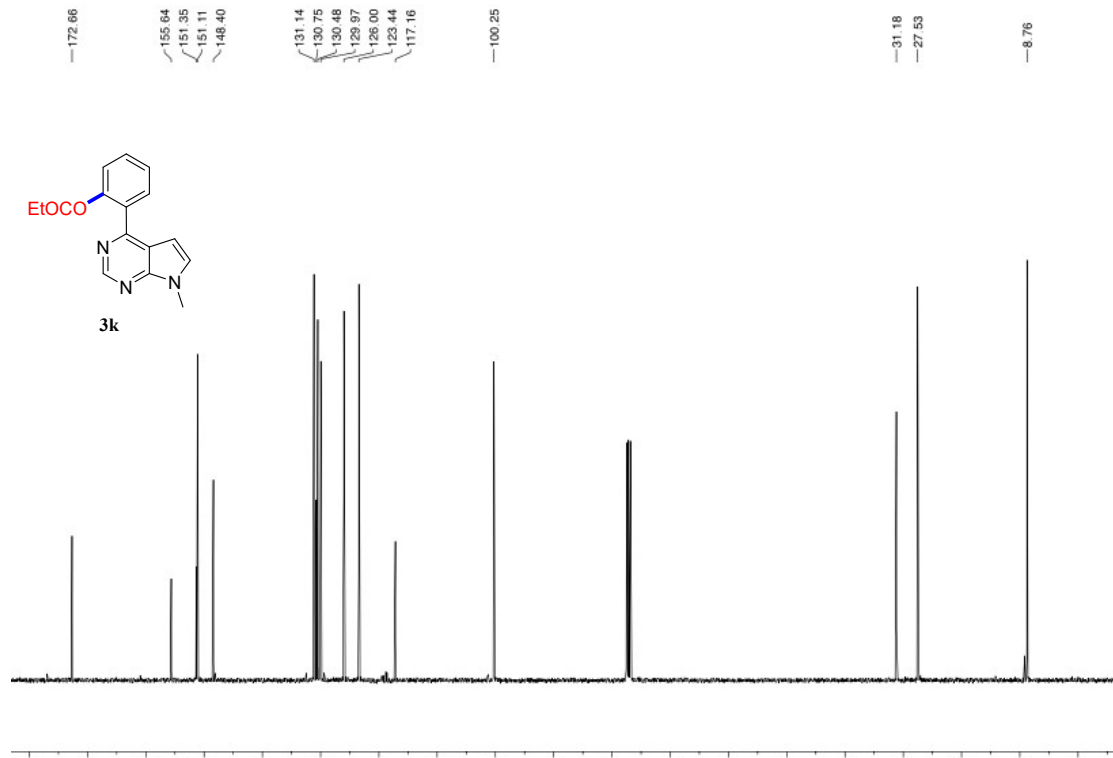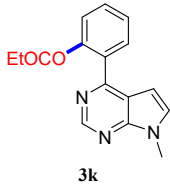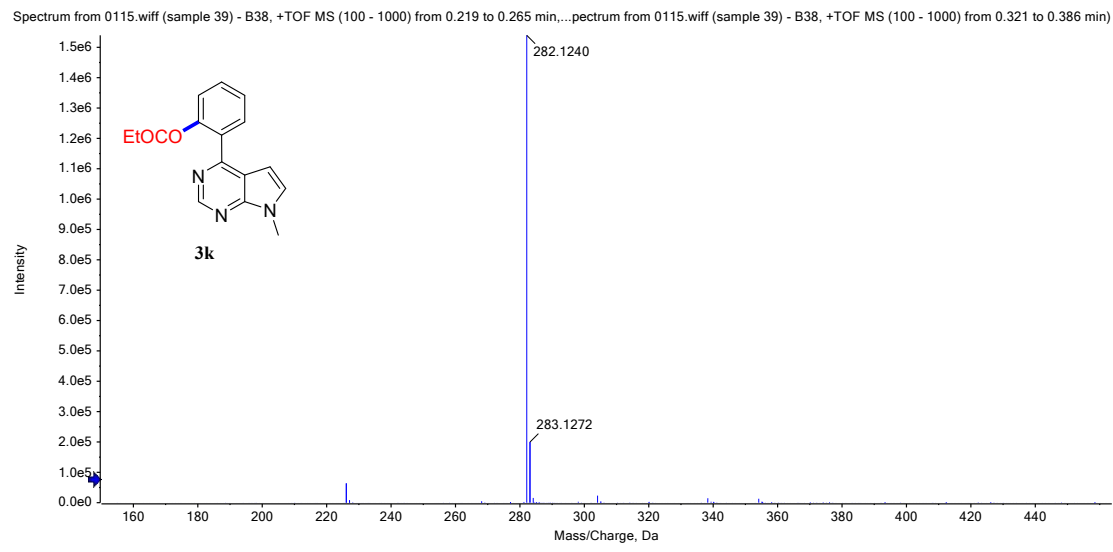

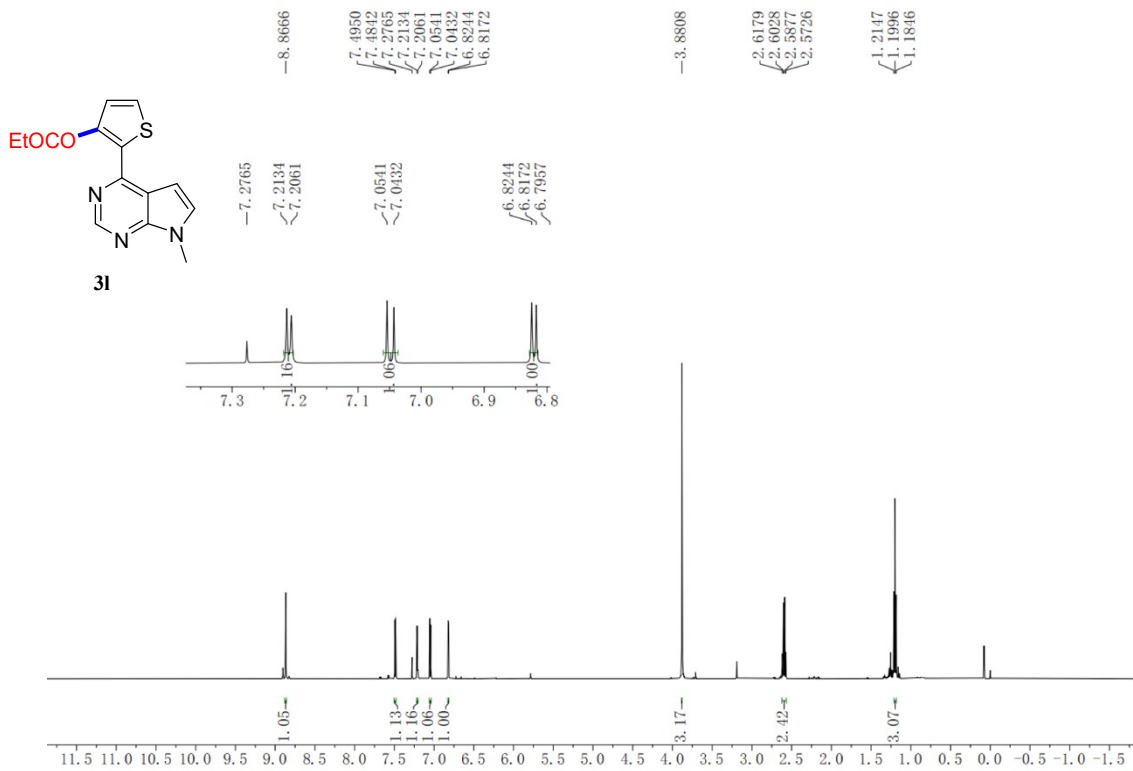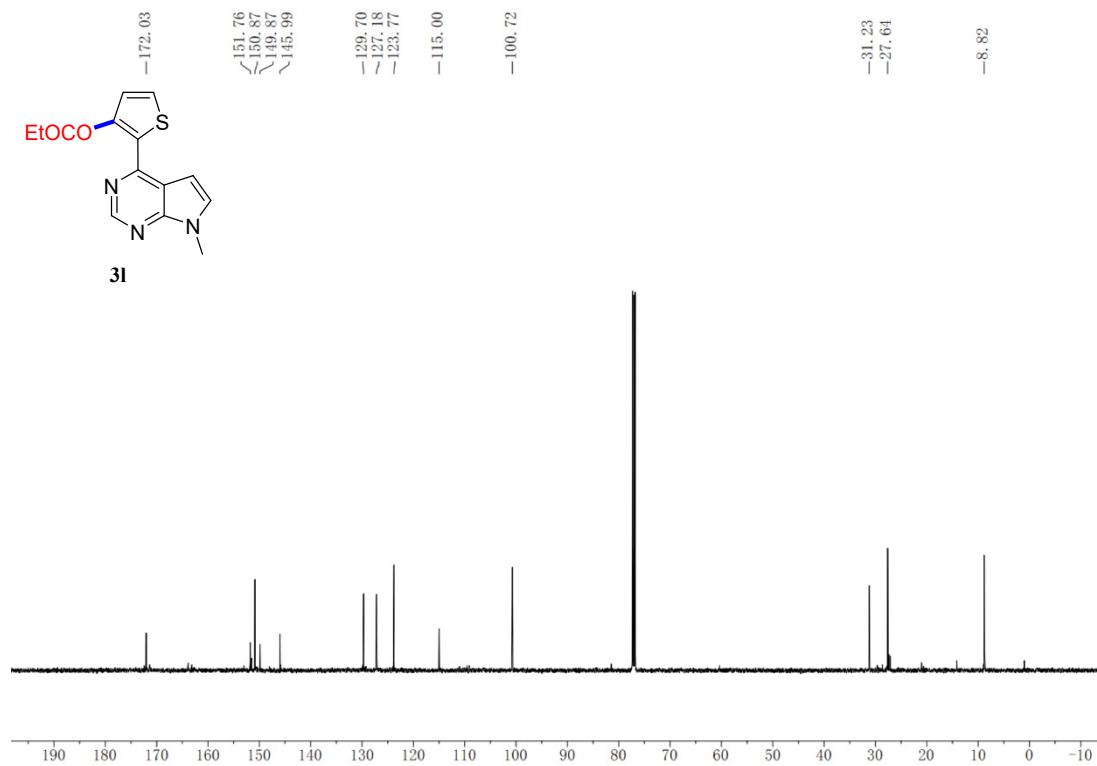

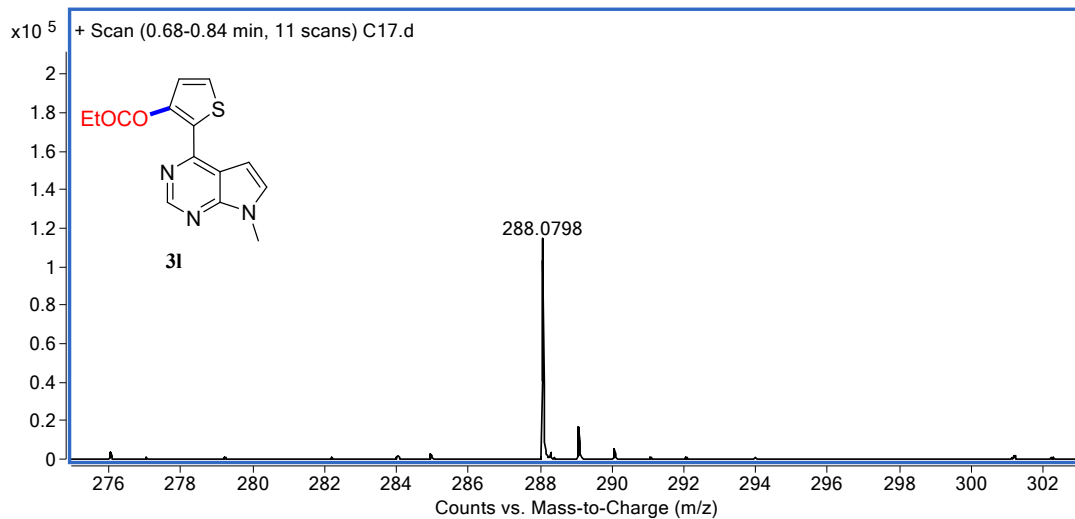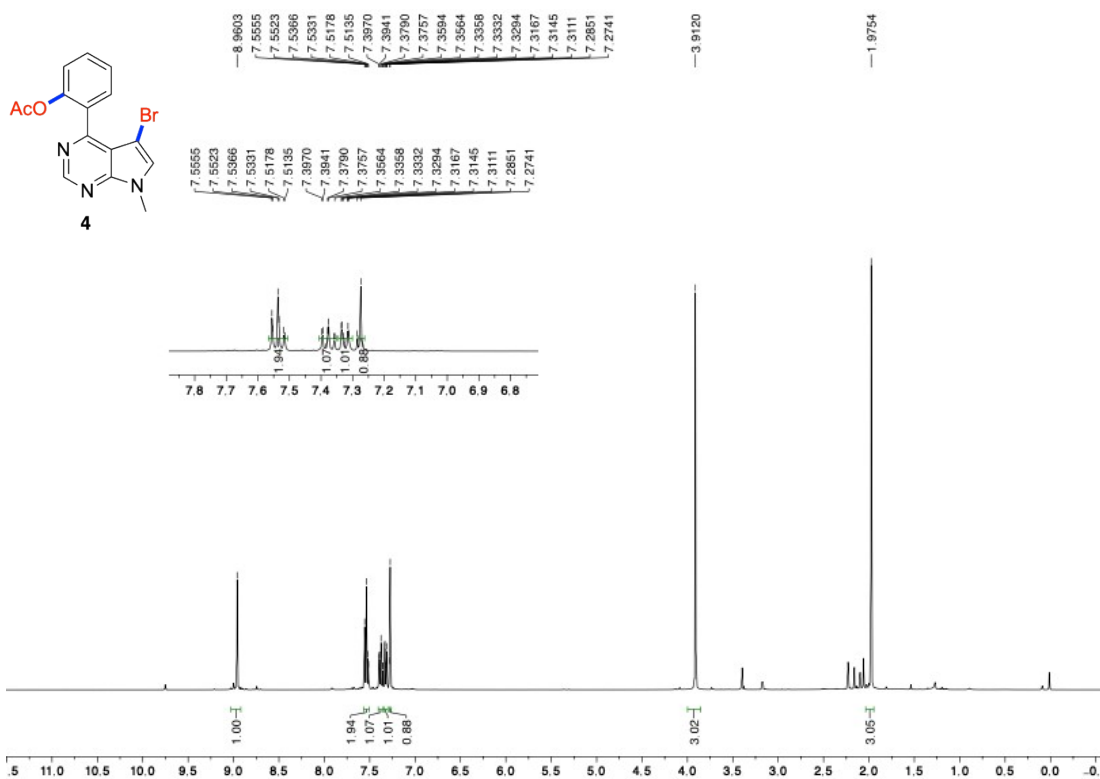

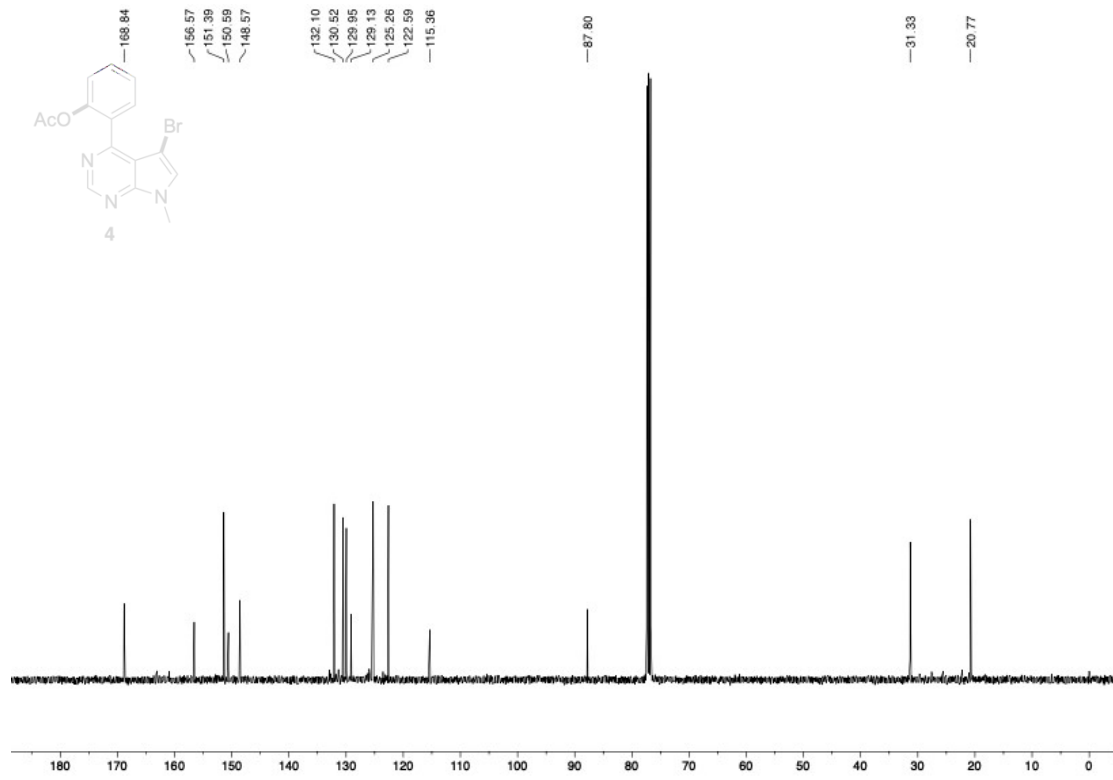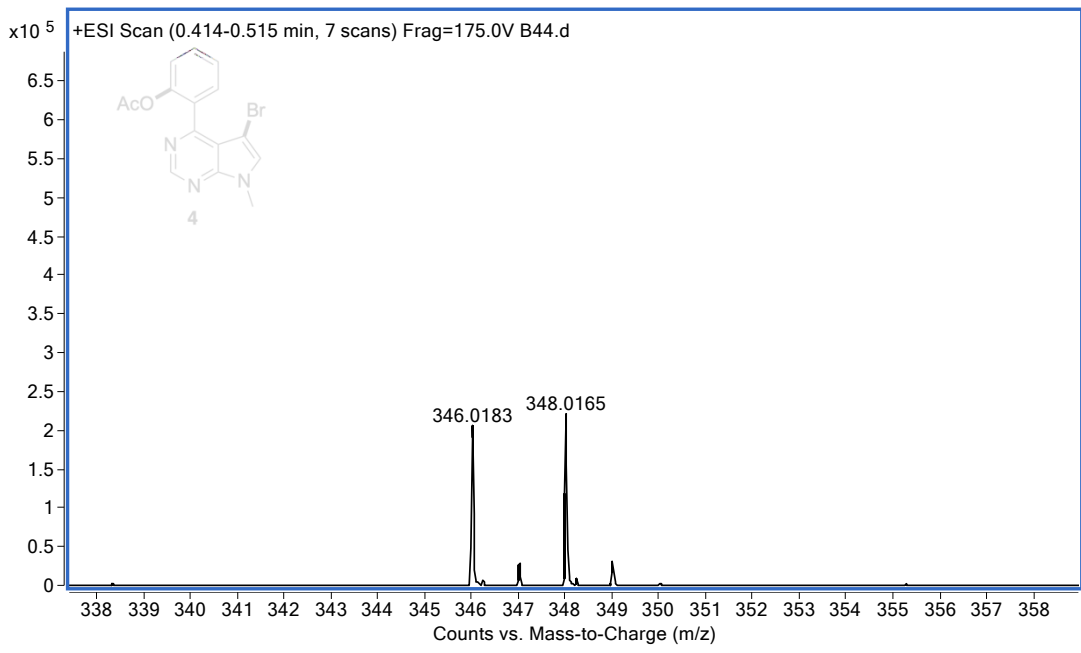

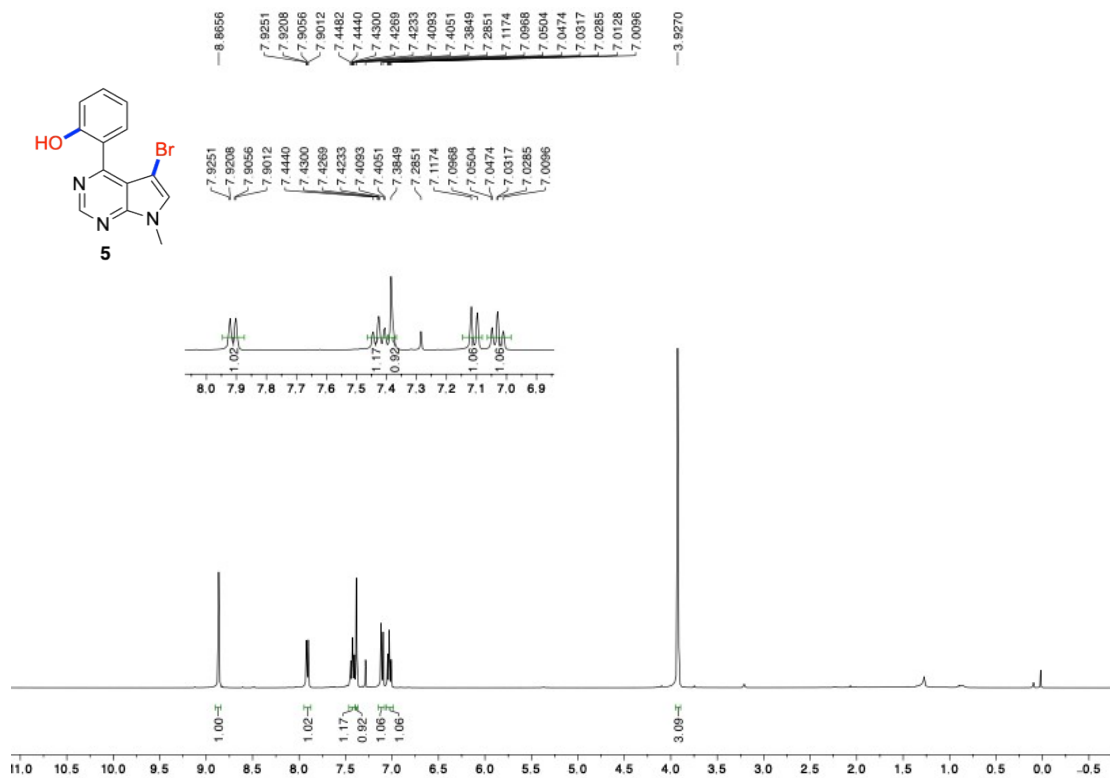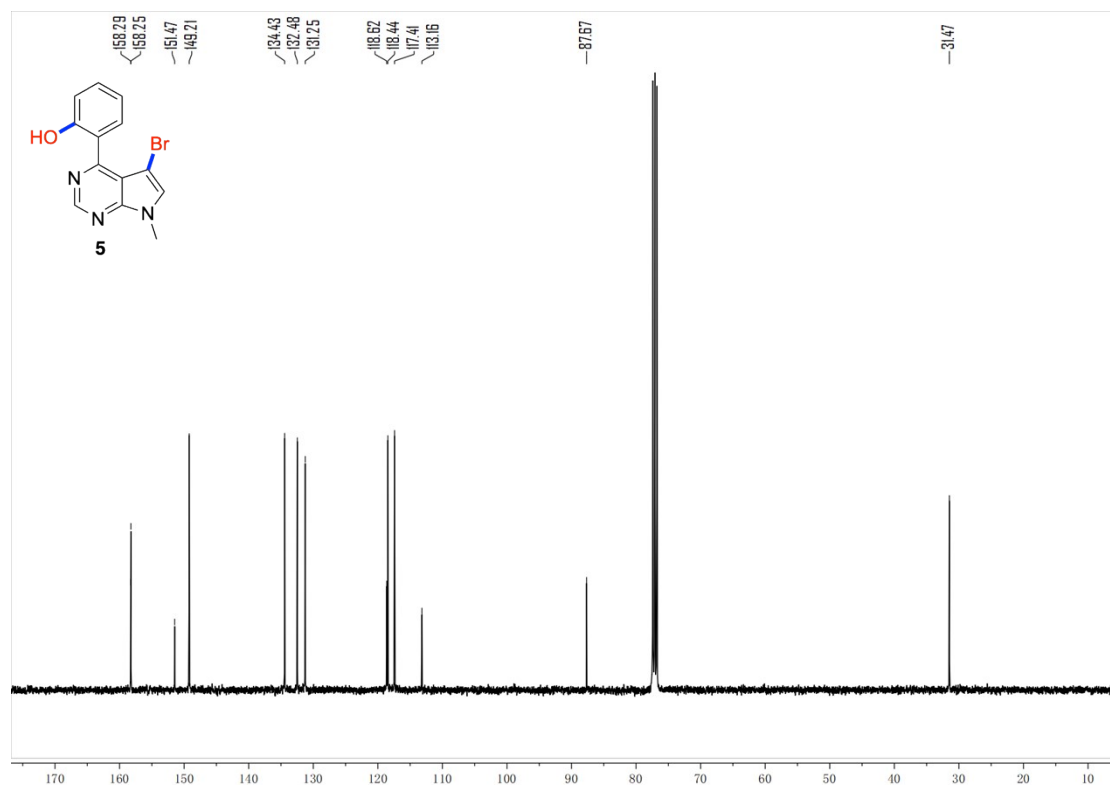

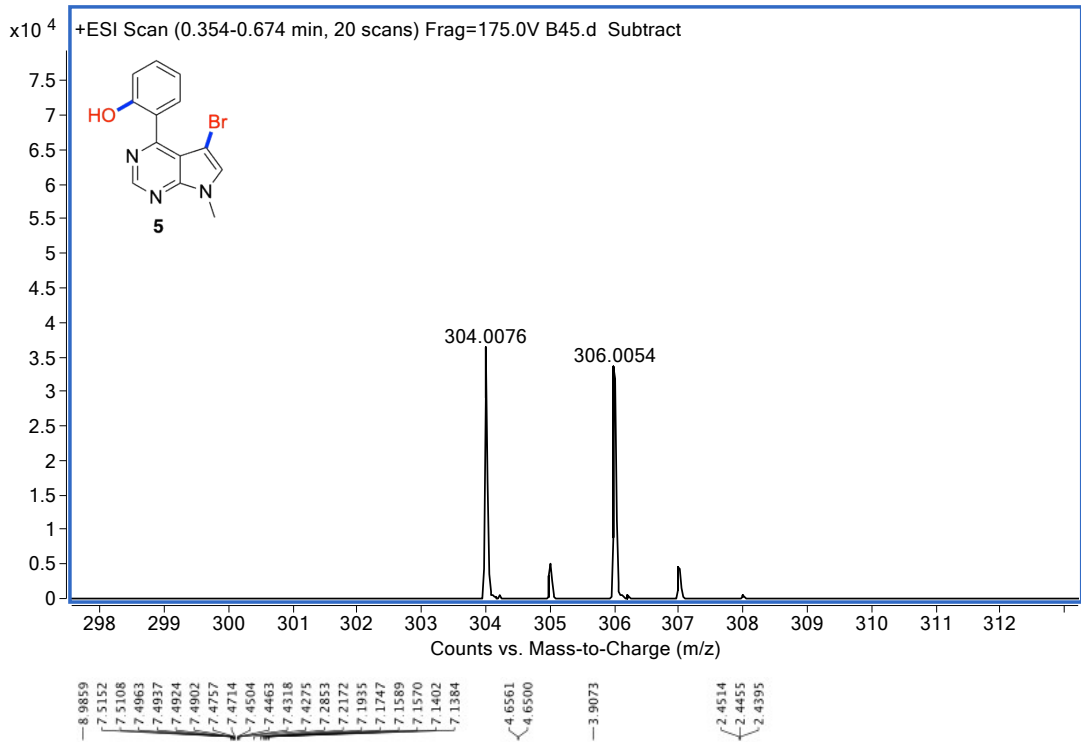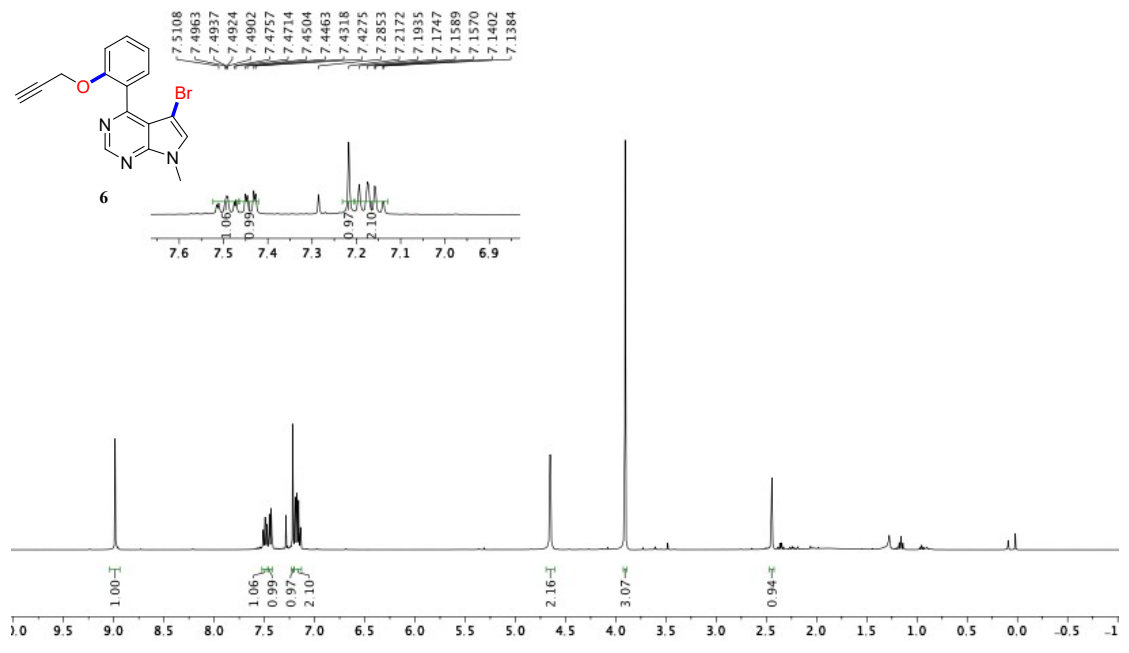



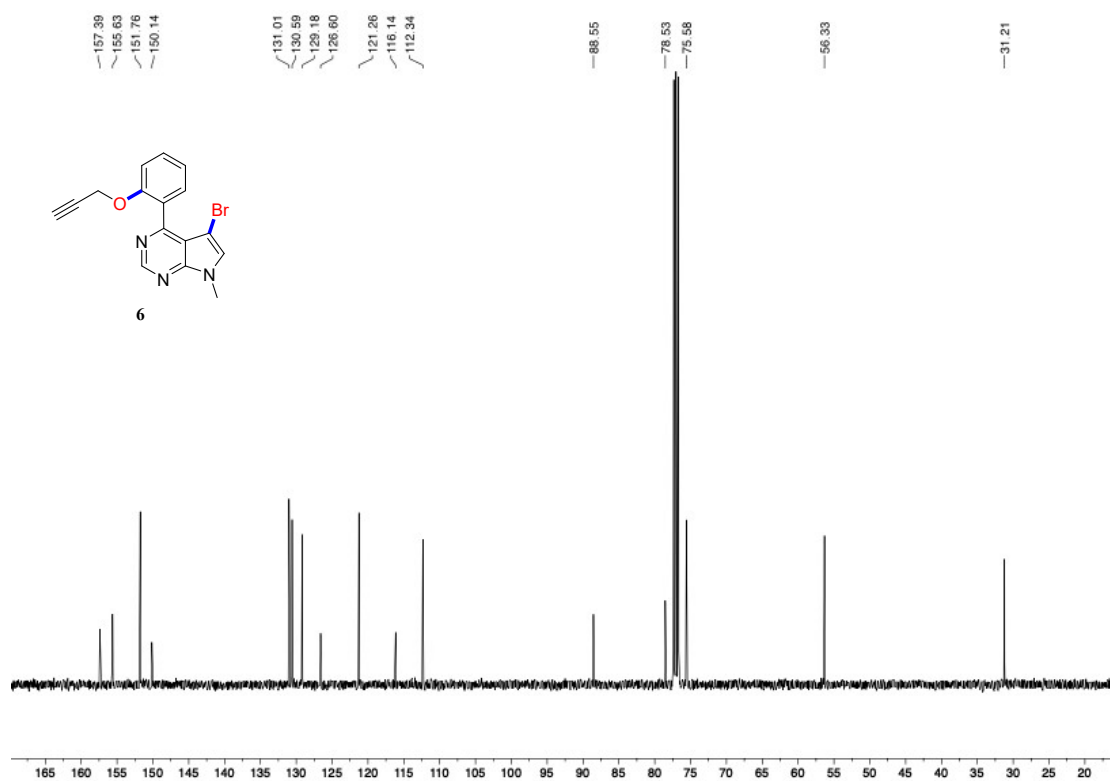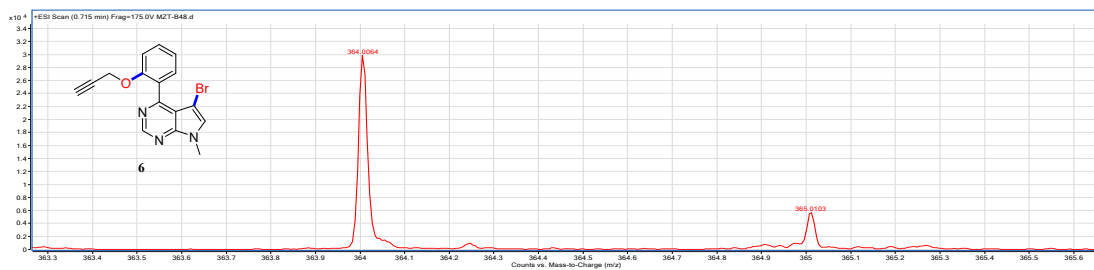

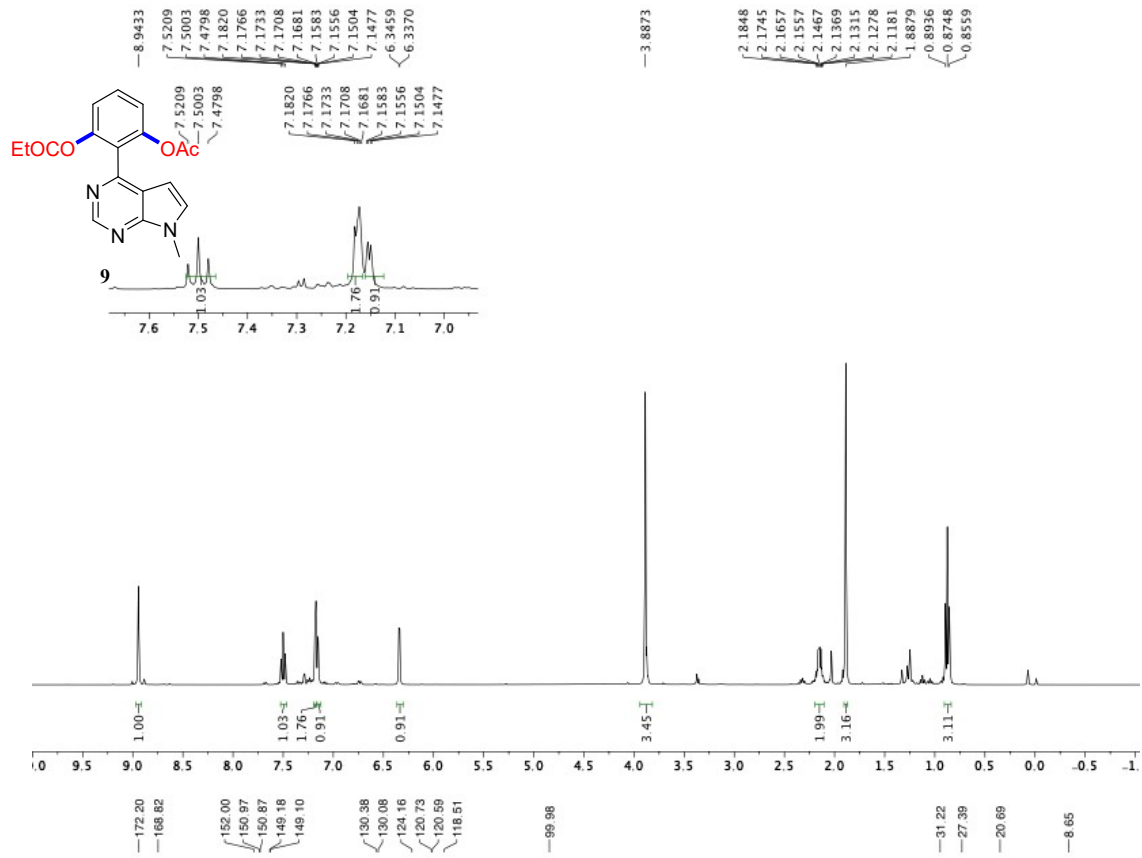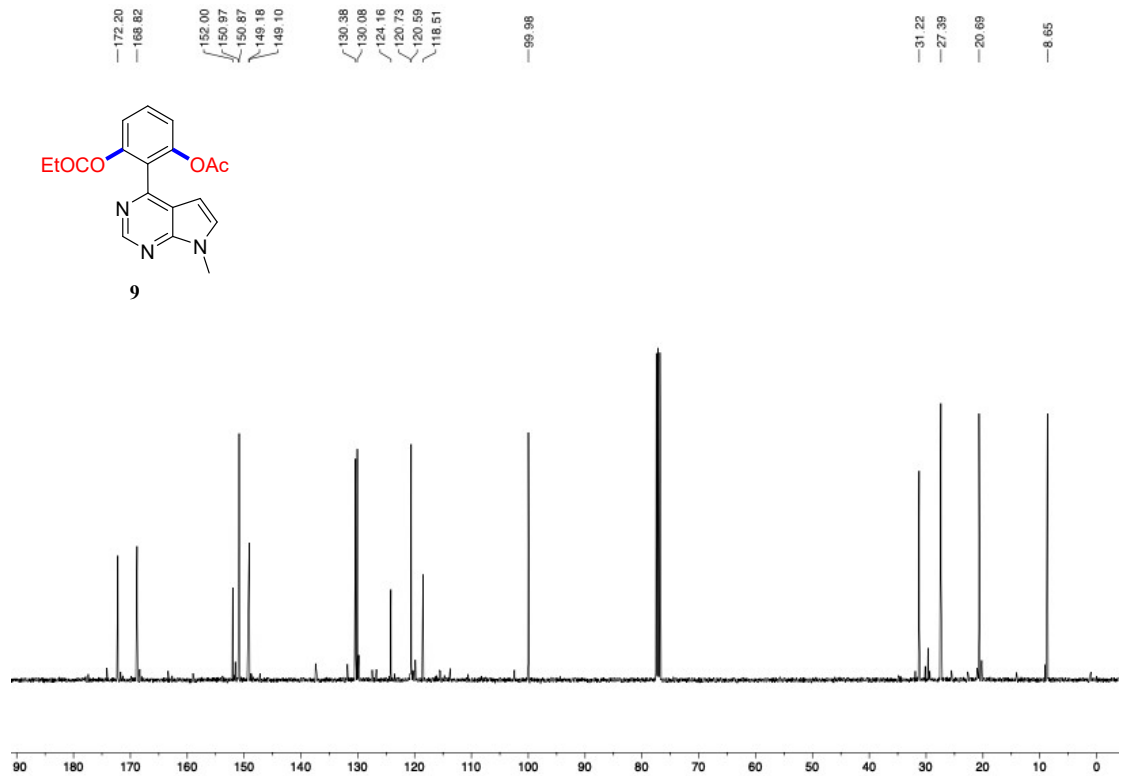

Spectrum from 0115.wiff (sample 40) - B43, +TOF MS (100 - 1000) from 0.242 to 0.307 min,...spectrum from 0115.wiff (sample 40) - B43, +TOF MS (100 - 1000) from 0.372 to 0.456 min)

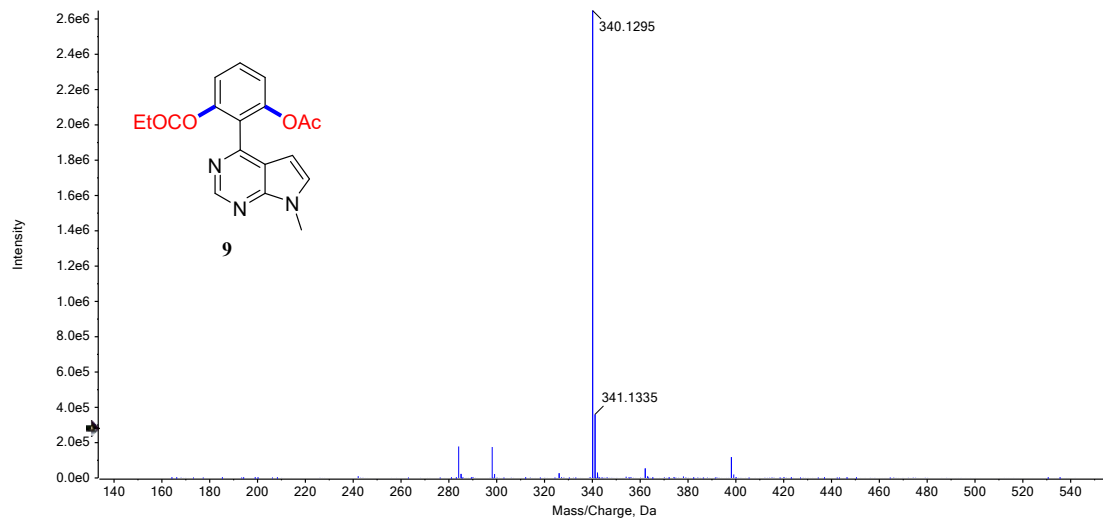

## 6. ESI-MS spectra for radical trapping experiment with BHT

MZT-BHT1 #81 RT: 0.44 AV: 1 SB: 86 0.05-0.28 , 0.69-1.40 NL: 3.20E5 F:ITMS + c  
ESI Full ms [50.00-1200.00]

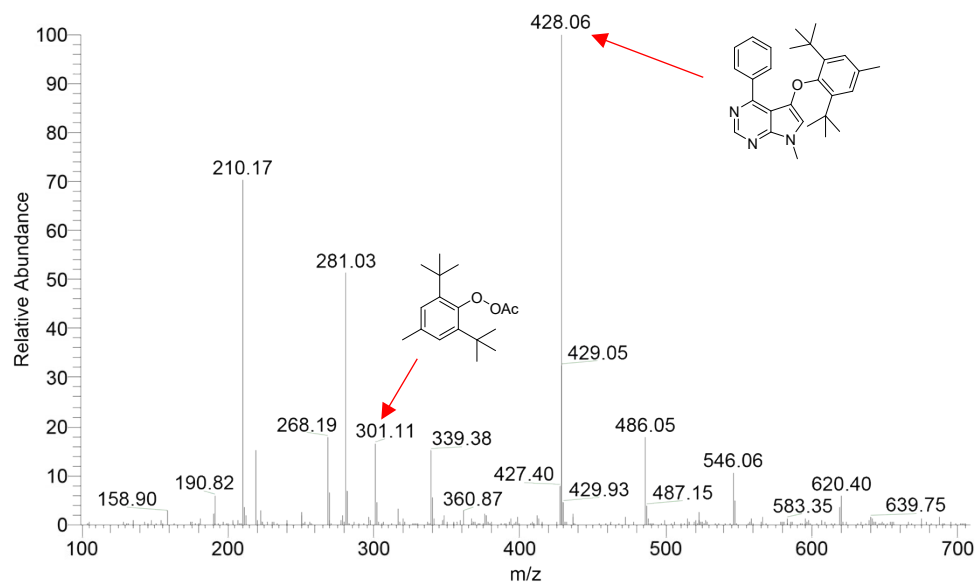

MZT-BHT2 #89 RT: 0.48 AV: 1 NL: 2.13E4  
F: ITMS + c ESI Full ms [50.00-1200.00]

D:\2021\0324\MZT-BHT2

03/24/21 10:13:56

MZT-BHT2 #89 RT: 0.48 AV: 1 NL: 2.13E4  
F: ITMS + c ESI Full ms [50.00-1200.00]

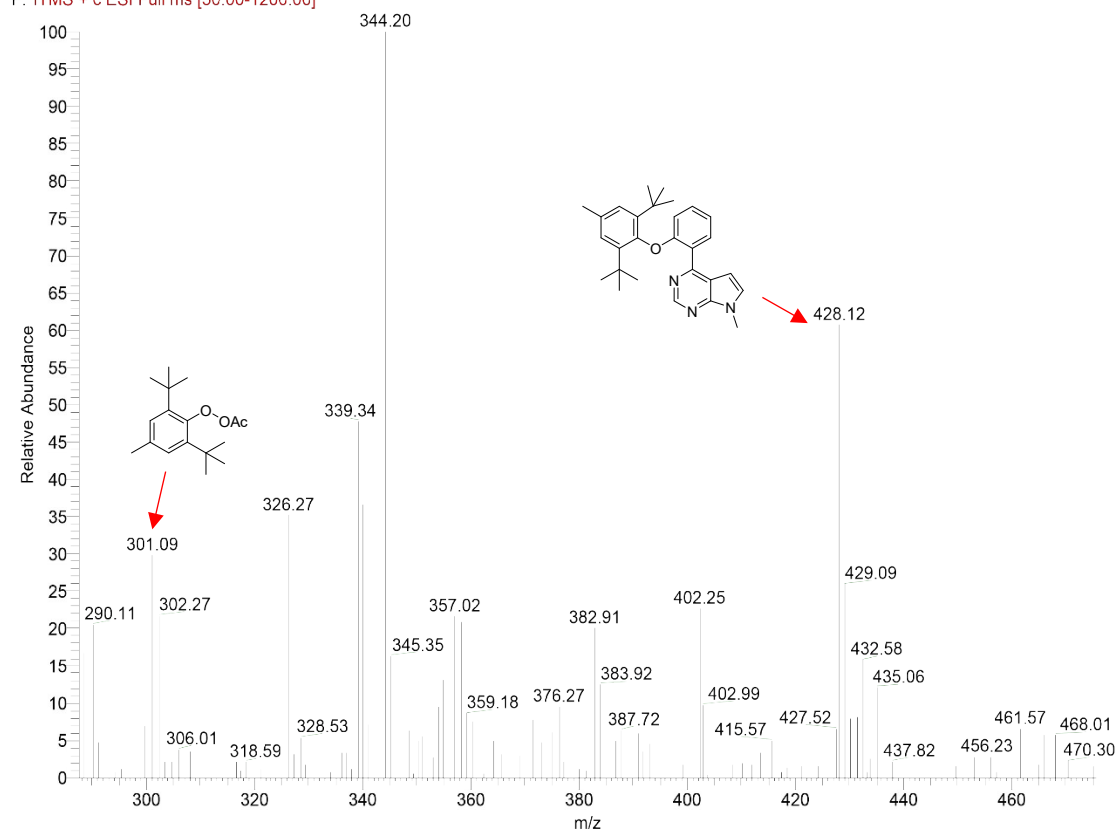

Supplement: d1ob01486b1.pdf [file d1ob01486b1.pdf]
